# Supplementary material
Source: Royal Society of Chemistry journal article supplement (doi:10.1039/d6cc01503d)
Supplement: d6cc01503d1.pdf [file d6cc01503d1.pdf]

# Efficient Access to $\alpha$ -Substituted $\beta$ -Keto Phosphonates via NHC-Catalyzed Dehaloacylation of $\alpha$ -Bromo Phosphonates

## Supporting Information

Ziye Cheng,<sup>1</sup> Lala Wang,<sup>1</sup> Hongqian Zou,<sup>1</sup> Tingting Li,<sup>1</sup> Ge-Fei Hao,<sup>1</sup> Lin-Hong Jin,<sup>1</sup>  
B. Marambe,<sup>3</sup> Barana C. Jayawardana,<sup>3</sup> Huimin Xia,<sup>2,\*</sup> Shi-Chao Ren<sup>1,\*</sup>

<sup>1</sup>State Key Laboratory of Green Pesticide, Guizhou University, Guiyang, 550025, China.

<sup>2</sup>School of Pharmaceutical Science, Guizhou University, Guiyang, 550025, China.

<sup>3</sup>Faculty of Agriculture, University of Peradeniya, Peradeniya 20400, Sri Lanka

Corresponding Author Email: [sren@gzu.edu.cn](mailto:sren@gzu.edu.cn); [hmxia@gzu.edu.cn](mailto:hmxia@gzu.edu.cn)

## Table of Contents

|                                                                                                              |    |
|--------------------------------------------------------------------------------------------------------------|----|
| <b>1. General information</b> .....                                                                          | 1  |
| <b>2. Optimization of the reaction conditions<sup>a</sup></b> .....                                          | 2  |
| <b>3. Mechanistic study and proposed reaction pathway.</b> .....                                             | 3  |
| <b>4. Supplementary Methods</b> .....                                                                        | 3  |
| <b>4.1 Preparation and characterization of carbene catalysts</b> .....                                       | 3  |
| <b>4.2 Preparation of Starting Materials</b> .....                                                           | 8  |
| <b>4.3 Typical procedure for the preparation of diethyl <math>\alpha</math>-bromobenzylphosphonate</b> ..... | 8  |
| <b>4.4 Typical procedure for the preparation of aldehydes derived from drug molecules</b> ....               | 9  |
| <b>4.5 General procedure for substrate scope</b> .....                                                       | 10 |
| <b>4.6 Gram-scale synthesis and chemical transformation of products</b> .....                                | 10 |
| <b>4.7 Further methods for product transformation</b> .....                                                  | 11 |
| <b>5. Antibacterial studies of the products</b> .....                                                        | 13 |
| <b>6. Analytical data of products</b> .....                                                                  | 14 |
| <b>6. Supplementary Reference</b> .....                                                                      | 42 |
| <b>7. Supplementary Figures</b> .....                                                                        | 44 |

## 1. General information

All compounds were fully characterized by spectroscopic data. The NMR spectra were recorded on a Bruker ASCEND 400 (400 MHz) spectrometer ( $^1\text{H}$ : 400 MHz,  $^{13}\text{C}$ : 101 MHz,  $^{19}\text{F}$ : 377 MHz,  $^{31}\text{P}$ : 162 MHz), and deuterated  $\text{CDCl}_3$  was used as solvent. Chemical shifts ( $\delta$ ) for  $^1\text{H}$  and  $^{13}\text{C}$  NMR spectra are given in ppm relative to TMS. The residual solvent signals were used as references for  $^1\text{H}$ ,  $^{13}\text{C}$ , and  $^{31}\text{P}$  NMR spectra, and the chemical shifts were converted to the TMS scale ( $\text{CDCl}_3$ :  $\delta\text{H} = 7.26$  ppm,  $\delta\text{C} = 77.0$  ppm; DMSO:  $\delta\text{H} = 2.50$  ppm,  $\delta\text{C} = 40.0$  ppm). The following abbreviations were used to explain the multiplicities: s = singlet, d = doublet, t = triplet, q = quartet, m = multiplet, dd = doublet of doublet, etc. All first-order splitting patterns were assigned on the basis of the appearance of the multiplet. Splitting patterns that could not be easily interpreted are designated as multiplet (m). High-resolution mass spectrometer analysis (HRMS) was performed on a Thermo Fisher Q Exactive mass spectrometer. Analytical thin-layer chromatography (TLC) was carried out on a pre-coated silica gel plate (0.2 mm thickness). All chemicals and solvents were used as received without further purification unless otherwise stated. Column chromatography was performed on silica gel (200–300 mesh).

## 2. Optimization of the reaction conditions<sup>a</sup>

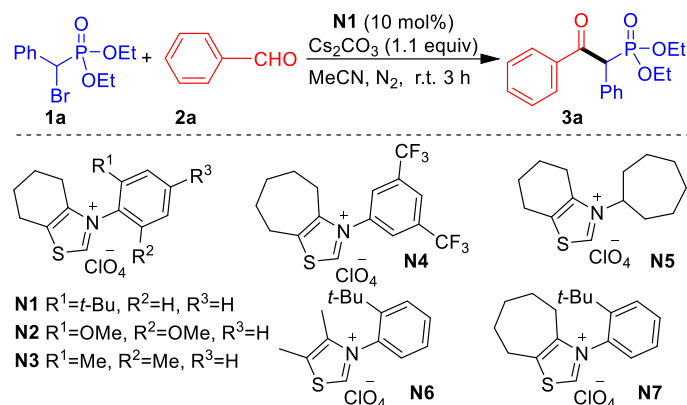

**Table S1.**

| Entry | Variation from the initial conditions                                                               | <b>3a</b> [%] <sup>b</sup> |
|-------|-----------------------------------------------------------------------------------------------------|----------------------------|
| 1     | none                                                                                                | 13                         |
| 2     | 60 °C instead of room temperature                                                                   | 59                         |
| 3     | 80 °C instead of room temperature                                                                   | 74                         |
| 4     | As entry 3, <b>N2</b> instead of <b>N1</b>                                                          | 45                         |
| 5     | As entry 3, <b>N3</b> instead of <b>N1</b>                                                          | 39                         |
| 6     | As entry 3, <b>N4</b> instead of <b>N1</b>                                                          | 26                         |
| 7     | As entry 3, <b>N5</b> instead of <b>N1</b>                                                          | 27                         |
| 8     | As entry 3, <b>N6</b> instead of <b>N1</b>                                                          | 19                         |
| 9     | As entry 3, <b>N7</b> instead of <b>N1</b>                                                          | 55                         |
| 10    | As entry 3, DMSO, EtOAc instead of MeCN                                                             | 16, 63                     |
| 11    | As entry 3, THF or 1,4-dioxane instead of MeCN                                                      | 45, 62                     |
| 12    | As entry 3, DCM instead of MeCN                                                                     | 90                         |
| 13    | As entry 3, DCE instead of MeCN                                                                     | 22                         |
| 14    | As entry 12, $\text{K}_3\text{PO}_4$ instead of $\text{Cs}_2\text{CO}_3$                            | 98(90) <sup>c</sup>        |
| 15    | As entry 12, DBU instead of $\text{Cs}_2\text{CO}_3$                                                | 24                         |
| 16    | As entry 12, $\text{Na}_2\text{CO}_3$ , $\text{K}_2\text{CO}_3$ instead of $\text{Cs}_2\text{CO}_3$ | 0, 12                      |
| 17    | As entry 14, without NHC or base                                                                    | 0                          |

<sup>a</sup> Reaction conditions: **1a** (1.0 equiv), **2a** (1.2 equiv), NHC (10 mol%),  $\text{K}_3\text{PO}_4$  (1.1 equiv), DCM (1.0 mL),  $\text{N}_2$  atmosphere, 80 °C, 3 h. <sup>b</sup> The yield is determined by <sup>1</sup>H NMR of the reaction mixture with 1,3,5-trimethoxybenzene being used as internal standard. <sup>c</sup> Isolated yields.

### 3. Mechanistic study and proposed reaction pathway.

#### a. Reactions in the presence of radical scavenger

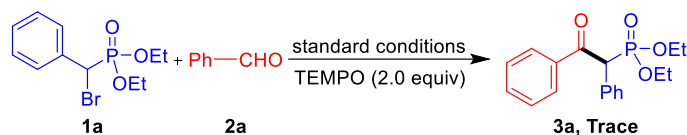

#### b. Possible reaction pathway

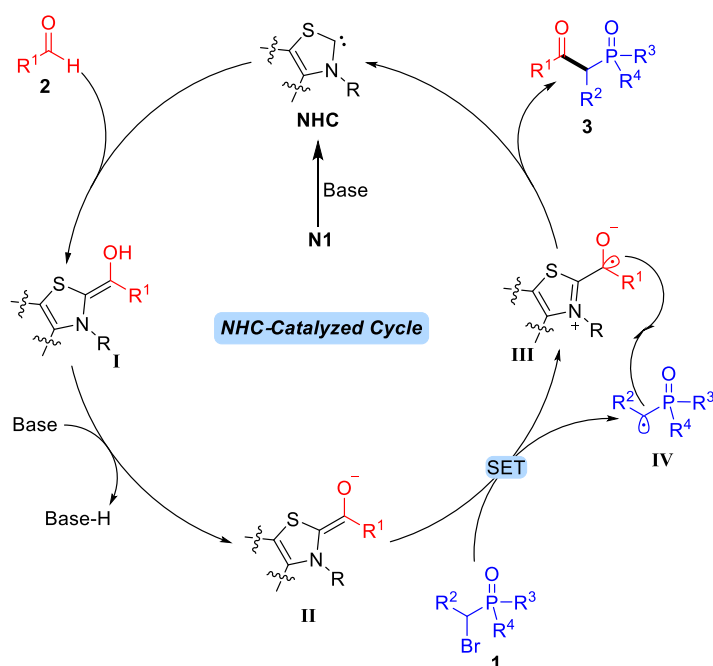

Figure S1

**Radical trapping experiment:** In an oven dried 10 mL Schlenk tube equipped with a magnetic stir bar, substrates **1a** (0.1 mmol), **2a** (0.12 mmol), **N1** (10 mol%), Tempo (0.2 mmol, 2 equiv) and 0.11 mmol  $K_3PO_4$  were added to degassed DCM (1 mL) under the nitrogen atmosphere. Then, the reaction mixture was stirred under 80 °C for 3 h.

## 4. Supplementary Methods

### 4.1 Preparation and characterization of carbene catalysts

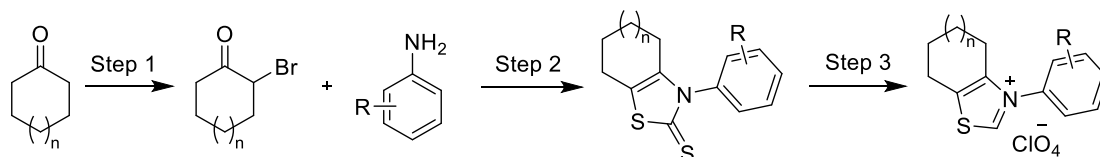

Scheme S1.

**Step 1:** A round-bottom flask was charged with the ketone (1.0 equiv) in  $CH_2Cl_2$  (0.25 mL/mmol). At room temperature, *p*-toluenesulfonic acid monohydrate (0.1 equiv) was added in one portion, followed by portionwise addition of *N*-bromosuccinimide (1.0 equiv). The reaction was cooled as necessary. After complete conversion, *n*-pentane was added, and stirring was continued for an additional 5-10 min. The solid was collected by suction filtration and washed with *n*-pentane. The organic phase was then washed successively with saturated aqueous  $Na_2S_2O_5$  solution,

half-saturated aqueous NaHCO<sub>3</sub> solution, and brine. The organic phase was dried over anhydrous MgSO<sub>4</sub>, and the volatiles were removed under reduced pressure. The crude product obtained was used directly in the next step without further purification.

**Step 2:** A solution of the aniline (1.0 equiv) in DMSO (0.50 mL/mmol) was treated with 20 N aq. NaOH solution (1.0 equiv). At 0 °C CS<sub>2</sub> (1.0 equiv) was added dropwise and stirred for 1 h at room temperature. The ketone (1.0 equiv) was added 0 °C and the mixture was stirred for 1-3 h at room temperature. H<sub>2</sub>O (1 mL/mmol) was added, the mixture was stirred for 10 min at 0 °C and the supernatant solution was decanted three times. The resulting slurry was suspended in EtOH (1 mL/mmol), concd. HCl (0.05 mL/mmol) was added and the mixture was heated to reflux for 1 h. After cooling, a precipitate formed. The precipitate was collected by filtration, washed with H<sub>2</sub>O, and the resulting solid was used directly in the next step without further purification.

**Step 3:** A solution of the thione (1.0 equiv) in glacial acetic acid (4.12 mL/mmol) was treated under water bath cooling dropwise with H<sub>2</sub>O<sub>2</sub> (3.3 equiv) and was stirred for 30 min at that temperature. The volatile components were removed under reduced pressure. The residue was dissolved in MeOH (0.69 mL/mmol). At 0 °C a mixture of sodium perchlorate monohydrate (4.12 equiv) in a mixture of MeOH/H<sub>2</sub>O = 2/1 (3.45 mL/mmol) was added. The reaction mixture was extracted with CH<sub>2</sub>Cl<sub>2</sub> and H<sub>2</sub>O. The organic layer was separated, dried over anhydrous Na<sub>2</sub>SO<sub>4</sub>, and concentrated under reduced pressure. The resulting solid was recrystallized from methanol.<sup>1</sup>

### 3-(2-(tert-butyl)phenyl)-4,5,6,7-tetrahydrobenzo[d]thiazol-3-ium perchlorate(N1)

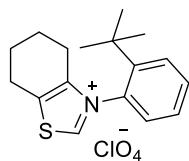

**According to Method in Section 4.1:** According to Step 1, 19.63 g of cyclohexanone (200 mmol), 35.60 g of NBS (200 mmol), and 3.80 g of *p*-toluenesulfonic acid monohydrate (20 mmol) were used to obtain 31.16 g of 2-bromocyclohexan-1-one (88% yield). According to Step 2, 7.46 g of 2-(tert-butyl)aniline (50 mmol) and 3.81 g of CS<sub>2</sub> (50 mmol) were taken, followed by the addition of 8.85 g of 2-bromocyclohexan-1-one (50 mmol). After the reaction, 3.12 g of crude 3-(2-(tert-butyl)phenyl)-4,5,6,7-tetrahydrobenzo[d]thiazole-2(3H)-thione (21% yield) was obtained, which was used directly in the next step without purification. According to Step 3, 3.12 g of the above thione (10.3 mmol) was treated with H<sub>2</sub>O<sub>2</sub> and glacial acetic acid, then reacted with 5.96 g of sodium perchlorate monohydrate. After recrystallization from methanol, 2.64 g of pure **N1** solid (69% yield) was obtained. The overall yield for the three steps is 14%. The characterization data for **N1** are as follows.

**<sup>1</sup>H NMR (400 MHz, CDCl<sub>3</sub>):** δ 9.83 (s, 1H), 7.70 – 7.68(m, 1H), 7.59 – 7.55 (m, 1H), 7.42 – 7.38 (m, 1H), 7.35 – 7.32 (m, 1H), 3.16 – 3.09 (m, 1H), 2.98 – 2.92 (m, 1H), 2.59 – 2.51 (m, 1H), 2.34 – 2.27 (m, 1H), 2.07 – 1.90 (m, 3H), 1.85 – 1.76 (m, 1H), 1.16 (s, 9H).

**<sup>13</sup>C NMR (101 MHz, CDCl<sub>3</sub>):** δ 157.31, 145.66, 145.20, 136.48, 131.92, 130.01, 129.05, 128.21, 36.15, 31.74, 24.22, 23.81, 21.52, 20.75.

**HRMS (ESI-TOF, m/z):** Found: *m/z* 272.1476. Calcd for C<sub>17</sub>H<sub>21</sub>NS<sup>+</sup>(M+H)<sup>+</sup> 272.1467

**3-(2,6-dimethoxycyclohexa-2,4-dien-1-yl)-4,5,6,7-tetrahydrobenzo[d]thiazol-3-ium perchlorate (N2)**

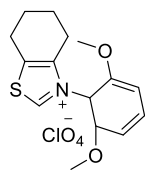

**According to Method in Section 4.1:** According to Step 1, 19.63 g of cyclohexanone (200 mmol), 35.60 g of NBS (200 mmol), and 3.80 g of *p*-toluenesulfonic acid monohydrate (20 mmol) were used to obtain 31.16 g of 2-bromocyclohexan-1-one (88% yield). According to Step 2, 22.98 g of 2,6-dimethoxyaniline (150 mmol) and 11.42 g of CS<sub>2</sub> (150 mmol) were taken, followed by the addition of 26.55 g of 2-bromocyclohexan-1-one (150 mmol) to obtain 16.33 g of crude product 3-(2,6-dimethoxyphenyl)-4,5,6,7-tetrahydrobenzo[d]thiazole-2(3H)-thione (35%), which was used directly in the next step without purification. According to Step 3, 16.33 g of the thione (53.1 mmol) was treated with H<sub>2</sub>O<sub>2</sub> and glacial acetic acid, then reacted with 30.73 g of sodium perchlorate monohydrate, and after recrystallization from methanol, 10.38 g of pure **N2** solid (52%) was obtained. The overall yield for the three steps is 19%. The following are the characterization data for **N2**.

**<sup>1</sup>H NMR (400 MHz, CDCl<sub>3</sub>):** δ 9.65 (s, 1H), 7.51 (t, J = 8.6 Hz, 1H), 6.73 (d, J = 8.6 Hz, 2H), 3.81 (s, 6H), 2.99 – 2.96 (m, 2H), 2.41 – 2.37 (m, 2H), 1.99 – 1.93 (m, 2H), 1.92 – 1.85 (m, 2H).

**<sup>13</sup>C NMR (101 MHz, CDCl<sub>3</sub>):** δ 158.45, 154.52, 144.94, 134.77, 133.56, 112.53, 104.60, 56.51, 23.66, 22.42, 21.61, 20.63.

**HRMS (ESI-TOF, m/z):** Found: *m/z* 276.1063. Calcd for C<sub>15</sub>H<sub>17</sub>NO<sub>2</sub>S<sup>+</sup>(M+H)<sup>+</sup> 276.1052

**3-(2,6-dimethylcyclohexa-2,4-dien-1-yl)-4,5,6,7-tetrahydrobenzo[d]thiazol-3-ium perchlorate (N3)**

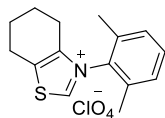

**According to Method in Section 4.1:** According to Step 1, 19.63 g of cyclohexanone (200 mmol), 35.60 g of NBS (200 mmol), and 3.80 g of *p*-toluenesulfonic acid monohydrate (20 mmol) were used to obtain 31.16 g of 2-bromocyclohexan-1-one (88% yield). According to Step 2, 6.06 g of 2,6-dimethylaniline (50 mmol) and 3.81 g of CS<sub>2</sub> (50 mmol) were taken, followed by the addition of 8.85 g of 2-bromocyclohexan-1-one (50 mmol) to obtain 10.18 g of crude product 3-(2,6-dimethylphenyl)-4,5,6,7-tetrahydrobenzo[d]thiazole-2(3H)-thione (74%), which was used directly in the next step without purification. According to Step 3, 10.18 g of the thione (37.0 mmol) was treated with H<sub>2</sub>O<sub>2</sub> and glacial acetic acid, then reacted with 21.41 g of sodium perchlorate monohydrate, and after recrystallization from methanol, 5.32 g of pure **N3** solid (42%) was obtained. The overall yield for the three steps is 31%. The following are the characterization data for **N3**.

**<sup>1</sup>H NMR (400 MHz, CDCl<sub>3</sub>):** δ 10.67 (s, 1H), 7.42 (t, J = 7.7 Hz, 1H), 7.27 (s, 2H), 3.02 (t, J = 6.0 Hz, 2H), 2.31 (t, J = 6.0, 2H), 2.04 (s, 6H), 2.04 – 1.97 (m, 2H), 1.94 – 1.91 (m, 2H).

**<sup>13</sup>C NMR (101 MHz, CDCl<sub>3</sub>):** δ 160.7, 144.3, 142.9, 136.9, 134.0, 131.6, 129.6, 23.8, 22.9, 21.7, 20.9, 17.5.

**HRMS (ESI-TOF, m/z):** Found:  $m/z$  244.1161. Calcd for  $C_{15}H_{17}NS^+$  ( $M+Na$ )<sup>+</sup> 244.1154

**3-(3,5-bis(trifluoromethyl)phenyl)-4,5,6,7-tetrahydrobenzo[d]thiazol-3-ium perchlorate (N4)**

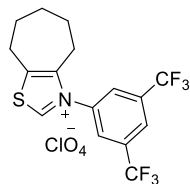

**According to Method in Section 4.1:** According to Step 1, 22.43 g of cycloheptanone (200 mmol), 35.60 g of NBS (200 mmol), and 3.80 g of *p*-toluenesulfonic acid monohydrate (20 mmol) were used to obtain 32.86 g of 2-bromocycloheptanone (86% yield). According to Step 2, 11.46 g of 3,5-bis(trifluoromethyl)aniline (50 mmol) and 3.81 g of  $CS_2$  (50 mmol) were taken, followed by the addition of 9.55 g of 2-bromocycloheptanone (50 mmol) to obtain 10.56 g of crude product 3-(3,5-bis(trifluoromethyl)phenyl)-3,4,5,6,7,8-hexahydro-2H-cyclohepta[d]thiazole-2-thione (53%), which was used directly in the next step without purification. According to Step 3, 10.56 g of the thione (26.6 mmol) was treated with  $H_2O_2$  and glacial acetic acid, then reacted with 15.39 g of sodium perchlorate monohydrate, and after recrystallization from methanol, 4.57 g of pure **N4** solid (37%) was obtained. The overall yield for the three steps is 20%. The following are the characterization data for **N4**.

**$^1H$  NMR (400 MHz,  $CDCl_3$ ):**  $\delta$  9.66 (s, 1H), 8.14 – 8.12 (m, 3H), 3.06 – 3.04 (m, 2H), 2.71 – 2.68 (m, 2H), 1.93 – 1.88 (m, 4H), 1.76 – 1.74 (m, 2H).

**$^{13}C$  NMR (101 MHz, DMSO):**  $\delta$  157.8, 148.6, 139.1, 138.7, 132.1 (q,  $J = 34.1$  Hz), 129.1 (d,  $J = 4.0$  Hz), 126.5 – 125.4 (m), 123.0 (q,  $J = 273.2$  Hz), 30.2, 27.5, 27.0, 26.4, 24.6.

**HRMS (ESI-TOF, m/z):** Found:  $m/z$  366.0746. Calcd for  $C_{16}H_{13}F_6NS^+$  ( $M+H$ )<sup>+</sup> 366.0745

**3-cycloheptyl-4,5,6,7-tetrahydrobenzo[d]thiazol-3-ium perchlorate (N5)**

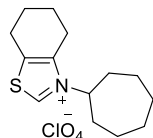

**According to Method in Section 4.1:** According to Step 1, 19.63 g of cyclohexanone (200 mmol), 35.60 g of NBS (200 mmol), and 3.80 g of *p*-toluenesulfonic acid monohydrate (20 mmol) were used to obtain 31.16 g of 2-bromocyclohexan-1-one (88% yield). According to Step 2, 5.66 g of cycloheptylamine (50 mmol) and 3.81 g of  $CS_2$  (50 mmol) were taken, followed by the addition of 8.85 g of 2-bromocyclohexan-1-one (50 mmol) to obtain 11.62 g of crude product 3-cycloheptyl-4,5,6,7-tetrahydrobenzo[d]thiazole-2(3H)-thione (87%), which was used directly in the next step without purification. According to Step 3, 11.62 g of the thione (43.5 mmol) was treated with  $H_2O_2$  and glacial acetic acid, then reacted with 25.17 g of sodium perchlorate monohydrate, and after recrystallization from methanol, 10.34 g of pure **N5** solid (71%) was obtained. The overall yield for the three steps is 62%. The following are the characterization data for **N5**.

**$^1H$  NMR (400 MHz,  $CDCl_3$ ):**  $\delta$  9.85 (s, 1H), 4.51 – 4.43 (m, 1H), 2.92 – 2.84 (m, 4H), 2.21 – 2.15 (m, 2H), 2.10 – 2.07 (m, 1H), 2.05 – 2.04 (m, 1H), 2.02 – 1.98 (m, 2H), 1.96 – 1.92 (m, 2H), 1.91 – 1.85 (m, 2H), 1.69 – 1.64 (m, 4H), 1.62 – 1.53 (m, 2H).

**$^{13}C$  NMR (101 MHz,  $CDCl_3$ ):**  $\delta$  152.69, 143.07, 136.16, 65.00, 35.29, 26.69, 24.30, 23.86, 23.28, 21.61, 20.91.

**HRMS (ESI-TOF, m/z):** Found:  $m/z$  236.1458. Calcd for  $C_{14}H_{21}NS^+$  (M+H) $^+$  236.1467

**3-(2-(tert-butyl)phenyl)-4,5-dimethylthiazol-3-ium perchlorate (N6)**

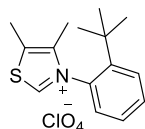

**According to Method in Section 4.1:** According to Step 2, 8.95 g of 2-(tert-butyl)aniline (60 mmol) and 4.58 g of  $CS_2$  (60 mmol) were taken, followed by the addition of 6.39 g of 3-chloro-2-butanone (60 mmol) to obtain 8.53 g of crude product 3-(2-(tert-butyl)phenyl)-4,5-dimethylthiazole-2(3H)-thione (51%), which was used directly in the next step without purification. According to Step 3, 8.53 g of the thione (30.6 mmol) was treated with  $H_2O_2$  and glacial acetic acid, then reacted with 17.71 g of sodium perchlorate monohydrate, and after recrystallization from methanol, 6.89 g of pure **N6** solid (65%) was obtained. The overall yield for the three steps is 33%. The following are the characterization data for **N6**.

**$^1H$  NMR (400 MHz,  $CDCl_3$ ):**  $\delta$  9.79 (s, 1H), 7.72 – 7.69 (m, 1H), 7.61 – 7.57 (m, 1H), 7.44 – 7.39 (m, 1H), 7.31 – 7.29 (m, 1H), 2.78 – 2.49 (m, 3H), 2.36 – 2.02 (m, 3H), 1.16 (s, 9H).

**$^{13}C$  NMR (101 MHz,  $CDCl_3$ ):**  $\delta$  156.98, 145.19, 143.74, 134.29, 134.16, 132.04, 130.10, 129.12, 128.34, 36.17, 31.72, 12.84, 12.66.

**HRMS (ESI-TOF, m/z):** Found:  $m/z$  246.1319. Calcd for  $C_{15}H_{19}NS^+$  (M+H) $^+$  246.1310

**3-(2-(tert-butyl)phenyl)-5,6,7,8-tetrahydro-4H-cyclohepta[d]thiazol-3-ium perchlorate (N7)**

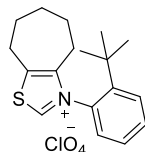

**According to Method in Section 4.1:** According to Step 1, 22.43 g of cycloheptanone (200 mmol), 35.60 g of NBS (200 mmol), and 3.80 g of *p*-toluenesulfonic acid monohydrate (20 mmol) were used to obtain 32.86 g of 2-bromocycloheptanone (86% yield). According to Step 2, 22.38 g of 2-(tert-butyl)aniline (150 mmol) and 11.43 g of  $CS_2$  (150 mmol) were taken, followed by the addition of 28.65 g of 2-bromocycloheptanone (150 mmol) to obtain 18.41 g of crude product 3-(2-(tert-butyl)phenyl)-3,4,5,6,7,8-hexahydro-2H-cyclohepta[d]thiazole-2-thione (39%), which was used directly in the next step without purification. According to Step 3, 18.41 g of the thione (58.0 mmol) was treated with  $H_2O_2$  and glacial acetic acid, then reacted with 33.56 g of sodium perchlorate monohydrate, and after recrystallization from methanol, 12.98 g of pure **N7** solid (65%) was obtained. The overall yield for the three steps is 22%. The following are the characterization data for **N7**.

**$^1H$  NMR (400 MHz,  $CDCl_3$ ):**  $\delta$  9.64 (s, 1H), 7.72 – 7.69 (m, 1H), 7.61 – 7.56 (m, 1H), 7.41 – 7.37 (m, 1H), 7.29 – 7.27 (m, 1H), 3.19 – 3.04 (m, 2H), 2.72 – 2.65 (m, 1H), 2.60 – 2.53 (m, 1H), 1.98 – 1.91 (m, 3H), 1.84 – 1.73 (m, 2H), 1.64 – 1.62 (m, 1H), 1.17 (s, 9H).

**$^{13}C$  NMR (101 MHz,  $CDCl_3$ ):**  $\delta$  155.62, 149.52, 145.25, 139.90, 134.33, 131.88, 129.88, 129.15, 128.11, 36.07, 31.63, 30.44, 28.23, 28.00, 26.42, 24.85.

**HRMS (ESI-TOF, m/z):** Found:  $m/z$  286.1629 Calcd for  $C_{18}H_{23}NS^+$  (M+H) $^+$  286.1623

### 3-(2,6-diisopropylphenyl)-4,5,6,7-tetrahydrobenzo[d]thiazol-3-ium perchlorate (N8)

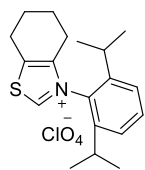

According to Method in Section 4.1

<sup>1</sup>H NMR (400 MHz, CDCl<sub>3</sub>): δ 9.88 – 9.85 (m, 1H), 7.60 – 7.56 (m, 1H), 7.37 – 7.34 (m, 2H), 3.12 (s, 2H), 2.27 (s, 2H), 2.10 – 2.06 (m, 2H), 2.05 – 1.97 (m, 2H), 1.90 (d, J = 6.3 Hz, 2H), 1.20 – 1.13 (m, 12H). This compound has already been reported in the literature.<sup>1</sup>

#### 4.2 Preparation of Starting Materials

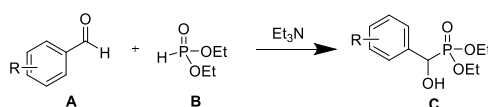

Scheme S2.

**General Procedure for the Synthesis of  $\alpha$ -Hydroxy-Phosphonates:** A mixture of aldehyde (1.01 equiv), diethylphosphite (1.00 equiv), and triethylamine (0.50 equiv) was stirred at room temperature or 50 °C for the indicated time. The reaction mixture was then diluted with chloroform and concentrated under reduced pressure to remove Et<sub>3</sub>N.<sup>2</sup>

#### 4.3 Typical procedure for the preparation of diethyl $\alpha$ -bromobenzylphosphonate

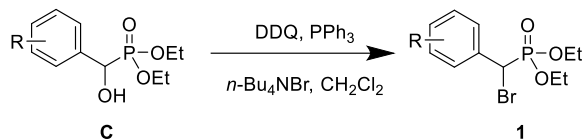

Scheme S3.

**Method A:** *n*-Bu<sub>4</sub>NBr (2 mmol, 0.644 g) was added to a stirring mixture of DDQ (2 mmol, 0.454 g) and PPh<sub>3</sub> (2 mmol, 0.524 g) in dry CH<sub>2</sub>Cl<sub>2</sub> (10 mL) at room temperature. Then **C** (1 mmol, 0.244 g) was added to the reaction mixture, and the progress of the reaction was monitored by TLC. After 5 h, the reaction mixture was washed with H<sub>2</sub>O (3 × 20 mL). The organic layer was separated and dried over anhydrous Na<sub>2</sub>SO<sub>4</sub> and filtered. Evaporation of the solvent afforded a crude product that was purified by preparative plate chromatography (silica gel) eluted with PE/EtOAc (3 : 1) to afford diethyl  $\alpha$ -bromobenzylphosphonate in 98% yield (0.3 g) as a yellow oily compound.<sup>3</sup>

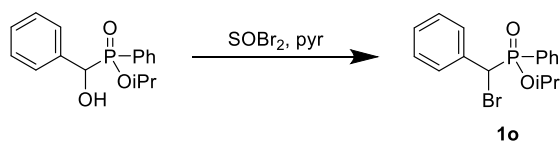

Scheme S4

**Method B:** In a round bottom flask,  $\alpha$ -hydroxy benzylic phosphonates (4 mmol) was dissolved in dry DCM (10 mL), and dry pyridine (5 mmol) was added. Thionyl bromide or thionyl chloride (5 mmol) was then added to the round bottom flask under inert atmosphere. The round bottom flask was sealed with a septum, cooled in an ice bath, and slowly allowed to come to room temperature overnight. The solvent was then evaporated, and the crude product was dissolved in ethyl acetate. The organic layer was washed with 1 M HCl, saturated NaHCO<sub>3</sub>, water, brine, then dried over Na<sub>2</sub>SO<sub>4</sub> and filtered. Evaporation of the solvent afforded a crude product that was purified by

preparative plate chromatography (silica gel) eluted with Hexane/EtOAc (3 : 1) to afford  $\alpha$ -halobenzylphosphonates as yellow oily compounds.<sup>4</sup>

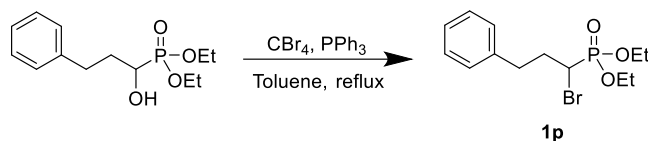

**Scheme S5**

**Method C:** Carbon tetrabromide (7.63 g, 0.023 mol) is added in one portion to a stirred solution of diethyl 1-hydroxyalkylphosphonate (0.02 mol) and triphenylphosphine (6.56 g, 0.025 mol) in dry toluene (25 mL) at room temperature (ice-water bath). Stirring is continued for 15 min at room temperature, and the mixture is then refluxed for 8 h. The solvent is removed in vacuo, and the brown, semisolid residue is extracted with hexane (3 × 50 ml). The combined extracts are filtered, and the solvent is evaporated under reduced pressure. The oily residue is distilled in vacuo to give analytically pure **1p**.<sup>5</sup>

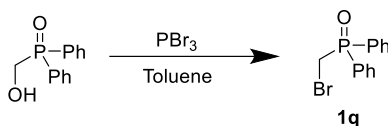

**Scheme S6**

**Method D:** A mixture of diaryl(hydroxymethyl)phosphine oxide (3.48 g, 15.0 mmol) and PBr<sub>3</sub> (1.62 g, 6.0 mmol) in 10 mL of anhydrous toluene was stirred in a 100 °C heating mantle for 1-3 h. Then the reaction mixture was diluted with an equal volume of chloroform. The organic solution was washed with water, NaHCO<sub>3</sub> saturated solution, water, and dried over Na<sub>2</sub>SO<sub>4</sub>. The solvent was removed in a vacuum, and the products were crystallized on standing as a white solid.<sup>6</sup>

#### 4.4 Typical procedure for the preparation of aldehydes derived from drug molecules

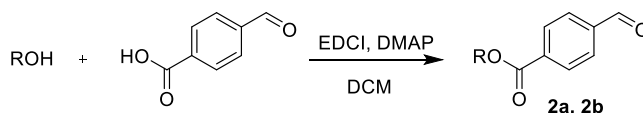

**Scheme S7**

**Method A:** To a solution of the 4-carboxybenzaldehyde (6 mmol, 1.2 equiv) in DCM (0.02 mmol/mL) was added EDCI (13 mmol, 2.6 equiv) at rt under an Ar atmosphere. Then, the resulting mixture was stirred for 5 min. Then the DMAP (2.5 mmol, 0.5 equiv) and the corresponding alcohol (5 mmol, 1.0 equiv) were added. After stirring overnight at rt, the mixture was washed with Na<sub>2</sub>CO<sub>3</sub>, H<sub>2</sub>O, and brine. The combined organic phases were dried over anhydrous Na<sub>2</sub>SO<sub>4</sub>, filtered, and concentrated in a vacuum, and the crude residue was then purified by column chromatography on silica gel.<sup>7</sup>

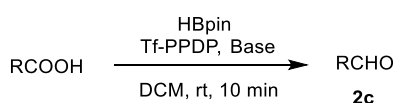

**Scheme S8**

**Method B:** To a 25 mL Schlenk tube equipped with a magnetic stirring bar, carboxylic acid (0.3 or 1.0 mmol, 1.0 equiv), base (1.6 or 1.8 equiv), and DCM (2.0 ~ 5.0 mL) were added under a dry nitrogen atmosphere. Then the Tf-PPDP (1.7 equiv) and HBpin (1.1 ~ 1.8 equiv) were added to the reaction mixture. After the reaction was stirred for 10 min, the crude mixture was quenched by H<sub>2</sub>O and extracted by DCM (3 × 3.0 mL). The combined organic layers were dried over anhydrous Na<sub>2</sub>SO<sub>4</sub>. After the solvent was removed under reduced pressure, the resulting residue was purified by flash column chromatography on silica gel and eluted with petroleum ether/ethyl acetate to afford the desired aldehydes.<sup>8</sup>

#### 4.5 General procedure for substrate scope

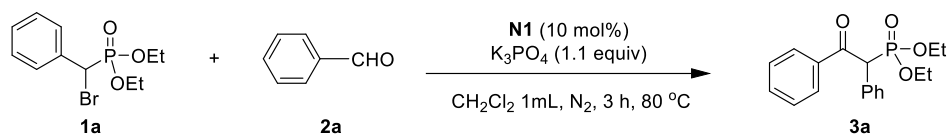

**Scheme S9**

**The model reaction A:** In an oven dried 10 mL Schlenk tube equipped with a magnetic stir bar, substrates **1a** (0.1 mmol), **2a** (0.12 mmol), **N1**(10 mol%), and 0.11 mmol K<sub>3</sub>PO<sub>4</sub> were added to degassed DCM (1 mL) under the nitrogen atmosphere. Then, the reaction mixture was stirred under 80 °C for 3 h. After completion of the reaction, the mixture removed under vacuum. The residue was purified by column chromatography on silica gel (petroleum ether/ethyl acetate from 2/1) to afford **3a** (90%).

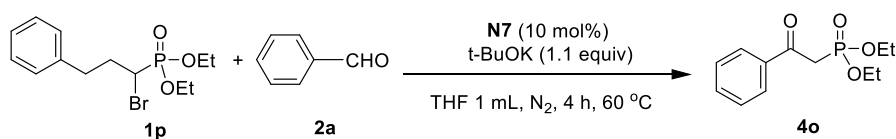

**Scheme S10**

**The model reaction B:** In an oven dried 10 mL Schlenk tube equipped with a magnetic stir bar, substrates **1p** (0.1 mmol), **2a** (0.12 mmol), **N7**(10 mol%), and 0.11 mmol t-BuOK were added to degassed THF (1 mL) under the nitrogen atmosphere. Then, the reaction mixture was stirred under 60 °C for 4 h. After completion of the reaction, the mixture removed under vacuum. The residue was purified by column chromatography on silica gel to afford **4o** (51%).

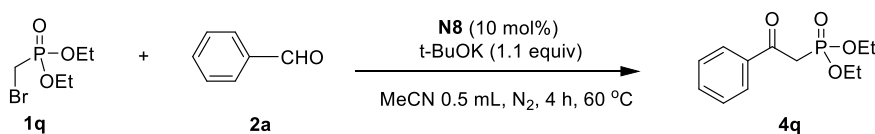

**Scheme S11**

**The model reaction C:** In an oven dried 10 mL Schlenk tube equipped with a magnetic stir bar, substrates **1q** (0.05 mmol), **2a** (0.06 mmol), **N8**(10 mol%), and 0.055 mmol t-BuOK were added to degassed MeCN (0.5 mL) under the nitrogen atmosphere. Then, the reaction mixture was stirred under 60 °C for 4 h. After completion of the reaction, the mixture removed under vacuum. The residue was purified by column chromatography on silica gel to afford **4q** (60%).

#### 4.6 Gram-scale synthesis and chemical transformation of products

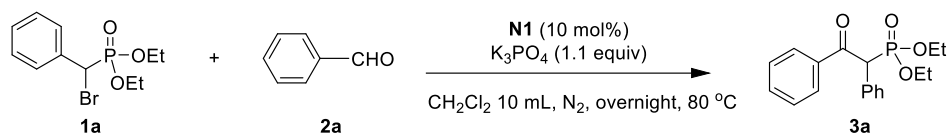

**Scheme S12**

In an oven dried 10 mL Schlenk tube equipped with a magnetic stir bar, substrates **1** (1.53 g), **2a** (0.64 g), **N2**(0.19 g), and  $K_3PO_4$ (1.16 g) were added to degassed DCM (10 mL) under the nitrogen atmosphere. Then, the reaction mixture was stirred under 80 °C for overnight. After completion of the reaction, the mixture removed under vacuum. The residue was purified by column chromatography on silica gel (petroleum ether/ethyl acetate from 2/1) to afford **3a** (79%).

#### 4.7 Further methods for product transformation

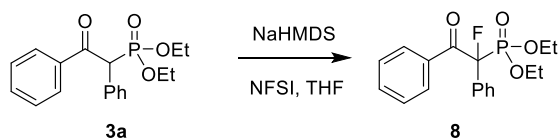

**Scheme S13**

**Method A:** To a solution of **3a** (0.097 g, 0.29 mmol) in dry THF (3 mL) at -78°C was added a solution of NaHMDS (0.22 mL, 2.0 M in THF, 0.44 mmol) over a period of 10 min under an atmosphere of dry argon. The resulting solution was stirred for 1 h at -78 °C. A solution of NFSI (0.12 g, 0.38 mmol) in dry THF (2 mL) was added over a period of 10 min, and the resulting solution stirred at -78 °C for 2 h. The solution was allowed to warm to -30 °C, and a precipitate formed, and quenched with 0.01 M hydrochloric acid. Volatiles were removed under reduced pressure, and the residue extracted with  $CH_2Cl_2$ . The organic layers were combined and concentrated by rotary evaporation. The crude material was purified via flash column chromatography of silica gel to yield **8** (0.093 g, 91% yield).<sup>9</sup>

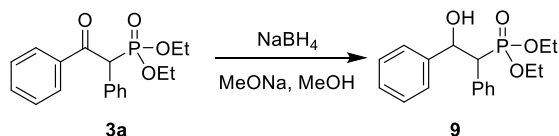

**Scheme S14**

**Method B:** A 100 mL two-necked round-bottom flask, equipped with a magnetic stir bar and fitted with a rubber septum, was charged with **3a** (0.15 mmol), methanol (5 mL), and NaOMe (0.0075 mmol) at 25 °C. Powdered  $NaBH_4$  (0.3 mmol) was added in one portion to the reaction mixture with constant stirring. The progress of the reaction was followed by TLC. The mixture was stirred for 3 h at 25 °C. The reaction was quenched by the addition of excess methanol. The resultant solution was evaporated on a rotary evaporator at reduced pressure, and the residue was extracted with  $CH_2Cl_2$ (5 × 10 mL). The organic layers were combined and concentrated by rotary evaporation. The crude material was purified via flash column chromatography of silica gel to yield **9** (0.0390 g, 78% yield).<sup>10</sup>

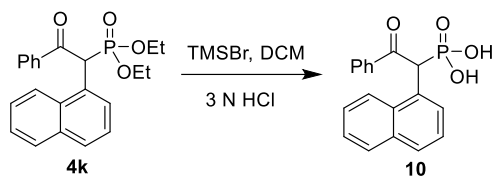

**Scheme S15**

**Method C:** To a stirred solution of 0.0704 g of **3a** in 3 mL of CH<sub>2</sub>Cl<sub>2</sub> was added a solution of 0.162 g of bromotrimethylsilane in 3 mL of CH<sub>2</sub>Cl<sub>2</sub>, and the mixture was stirred for 18 h, then concentrated under reduced pressure. The residue was treated with 3 N HCl (aq) and stirred for 3 h. The precipitate was collected, rinsed with ether, and dissolved in boiling methanol. The product precipitates upon addition of ethyl acetate to the boiling methanol solution. The precipitate was collected and rinsed with ethyl acetate to afford 0.0470 g (80%) of **10** as a solid.<sup>11</sup>

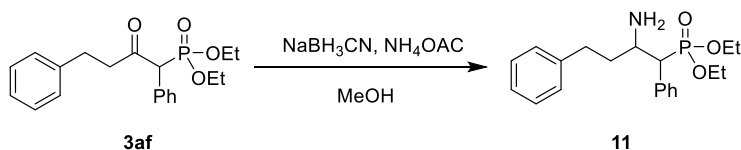

**Scheme S16**

**Method D:**  $\beta$ -Keto phosphonate **3af** (0.072 g) was dissolved in dried MeOH (5 mL). NH<sub>4</sub>OAc (0.611 g) was added and the reaction was heated to 25 °C for 10 min followed by addition of NaBH<sub>3</sub>CN (0.0664 g) and reflux at 60 °C for 16 h. Solvent removal was performed using reduced pressure and the remaining was dissolved in 0.5 M aq NaOH (5 mL) followed by extraction with EtOAc (3  $\times$  10 mL). The organic layers were combined and concentrated by rotary evaporation. The crude material was purified via flash column chromatography of silica gel to yield **11** (0.055 g, 76%).<sup>12</sup>

## 5. Antibacterial studies of the products

**Table S2. In vitro antibacterial activity of the new compounds. (50 µg/mL)**

| Compd               | Inhibition rate (%) |            |            |            |            |            |            |            |
|---------------------|---------------------|------------|------------|------------|------------|------------|------------|------------|
|                     | <i>Rs</i>           | <i>Ps</i>  | <i>Fo</i>  | <i>Ss</i>  | <i>Af</i>  | <i>Pc</i>  | <i>Fg</i>  | <i>Ab</i>  |
| <b>3c</b>           | 35.77±3.55          | 53.6±2.04  | 35.97±1.01 | 59.15±0.99 | 57.28±1.42 | 52.31±3.12 | 45.39±2.06 | 55.76±1.51 |
| <b>3r</b>           | 46.02±1.66          | 31.65±2.25 | 24.82±1.47 | 33.45±3.14 | 18.27±1.07 | 48.74±1.90 | 66.05±1.03 | 23.05±1.68 |
| <b>3h</b>           | 42.68±1.19          | 4.32±2.93  | 22.30±1.23 | 37.68±3.14 | 77.71±1.39 | 42.76±3.02 | 68.63±0.81 | 24.91±2.43 |
| <b>3g</b>           | 15.16±1.57          | 3.24±3.12  | 26.26±1.47 | 23.94±4.52 | 24.46±0.88 | 51.02±2.42 | 71.08±0.89 | 24.16±2.20 |
| <b>3q</b>           | 22.36±3.48          | 21.94±1.47 | 25.54±1.07 | 32.75±1.26 | 20.74±1.76 | 49.22±2.18 | 45.88±2.90 | 29.00±2.95 |
| <b>3ac</b>          | 52.44±3.01          | 75.18±1.07 | 47.12±1.07 | 78.52±1.44 | 59.13±1.07 | 44.22±3.94 | 67.45±1.58 | 69.14±0.82 |
| <b>3n</b>           | 35.37±1.06          | 39.57±3.26 | 28.06±1.59 | 53.17±3.29 | 38.70±1.52 | 42.50±1.34 | 63.53±2.21 | 47.21±3.95 |
| <b>3z</b>           | 58.94±3.99          | 11.08±4.16 | 23.74±1.01 | 27.11±2.00 | 5.57±1.28  | 51.41±4.19 | 44.58±2.11 | 21.56±2.95 |
| <b>3ad</b>          | 39.84±2.97          | 30.94±2.46 | 35.25±1.23 | 65.85±2.23 | 32.51±1.39 | 45.61±2.36 | 49.80±2.51 | 35.69±4.65 |
| <b>3d</b>           | 38.62±2.54          | 49.28±2.04 | 32.37±1.01 | 65.14±1.60 | 46.75±1.39 | 45.24±2.12 | 71.08±0.88 | 59.85±1.27 |
| <b>3k</b>           | 21.32±1.62          | 10.79±2.93 | 25.54±1.07 | 27.11±3.14 | 17.03±3.16 | 48.32±2.13 | 49.08±2.52 | 21.56±0.82 |
| <b>3s</b>           | 42.28±2.97          | 6.47±2.93  | 22.30±2.46 | 30.28±1.21 | 16.10±1.28 | 52.82±1.56 | 66.67±3.56 | 39.41±2.27 |
| <b>3e</b>           | 38.62±4.84          | 10.79±3.41 | 21.58±1.59 | 33.10±3.95 | 15.48±0.93 | 52.13±2.11 | 57.20±1.63 | 18.59±2.10 |
| <b>3b</b>           | 28.46±2.97          | 5.40±2.28  | 32.37±4.02 | 53.52±4.36 | 49.85±1.42 | 43.36±1.81 | 65.86±1.62 | 32.34±1.77 |
| <b>3i</b>           | 13.28±1.41          | 10.79±1.59 | 25.90±1.59 | 36.41±2.50 | 19.50±1.76 | 40.34±2.87 | 70.85±0.81 | 27.88±2.74 |
| <b>3f</b>           | 43.5±1.67           | 52.16±1.92 | 29.50±2.01 | 69.01±2.31 | 47.68±1.28 | 39.18±2.53 | 44.31±1.34 | 53.16±1.27 |
| <b>3t</b>           | 65.45±3.2           | 11.51±3.48 | 22.66±1.47 | 26.06±4.68 | 19.20±1.42 | 47.39±2.32 | 73.43±1.03 | 45.72±3.74 |
| <b>3j</b>           | 48.02±2.36          | 12.52±2.95 | 21.94±1.47 | 35.21±1.25 | 14.24±2.26 | 44.59±2.19 | 55.35±0.81 | 9.29±1.64  |
| <b>3x</b>           | 34.96±4.05          | 15.83±2.46 | 28.06±3.03 | 42.25±3.22 | 32.51±1.39 | 53.06±2.12 | 55.69±0.86 | 39.78±2.84 |
| <b>3o</b>           | 32.36±2.22          | 39.57±1.74 | 34.53±1.59 | 35.56±4.64 | 41.80±1.39 | 31.62±1.68 | 52.61±2.60 | 53.16±2.20 |
| <b>Mancozeb</b>     | 70.73±3.64          | 66.19±2.93 | 87.77±2.01 | 42.25±2.61 | 42.72±0.69 | 64.31±3.01 | 87.9±1.56  | 31.97±1.10 |
| <b>Azoxystrobin</b> | 67.07±3.57          | 56.12±3.41 | 56.12±1.01 | 57.75±2.42 | 52.01±2.26 | 54.23±2.04 | 61.62±1.63 | 59.13±2.04 |

All data were obtained as the average of three replicates; the commercial bactericides Mancozeb and Azoxystrobin were selected as the positive control; The antifungal activities of the compounds against *Rhizoctonia solani* (*Rs*), *Phomopsis* sp. (*Ps*), *Fusarium oxysporum* f. sp. *capsicum* (*Fo*), *Sclerotinia sclerotiorum* (*Ss*), *Phytophthora capsici* (*Pc*), *Fusarium graminearum* (*Fg*), and *Alternaria brassicicola* (*Ab*) were evaluated using the mycelial growth rate method.<sup>13</sup>



Hz, 3H). This compound has already been reported in the literature.<sup>14</sup>

**diethyl (bromo(4-bromophenyl)methyl)phosphonate (1d)**

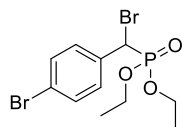

**According to Method A in Section 4.3**

**<sup>1</sup>H NMR (400 MHz, CDCl<sub>3</sub>):** δ 7.45 – 7.38 (m, 4H), 4.78 (d, <sup>1</sup>J<sub>P-H</sub> = 13.3 Hz, 1H), 4.22 – 4.14 (m, 2H), 4.10 – 3.99 (m, 1H), 3.93 – 3.82 (m, 1H), 1.29 (t, J = 7.1 Hz, 3H), 1.14 (t, J = 7.1 Hz, 3H). This compound has already been reported in the literature.<sup>15</sup>

**diethyl (bromo(naphthalen-1-yl)methyl)phosphonate (1l)**

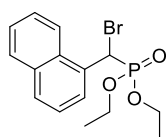

**According to Method A in Section 4.3**

**<sup>1</sup>H NMR (400 MHz, CDCl<sub>3</sub>):** δ 8.24 (s, 1H), 8.10 – 7.97 (m, 1H), 7.89 – 7.83 (m, 2H), 7.61 – 7.57 (m, 1H), 7.53 – 7.49 (m, 2H), 5.80 (d, <sup>1</sup>J<sub>P-H</sub> = 11.5 Hz, 1H), 4.35 – 4.21 (m, 2H), 4.09 – 3.95 (m, 1H), 3.80 – 3.71 (m, 1H), 1.35 (t, J = 7.1 Hz, 3H), 1.01 (t, J = 7.1 Hz, 3H). This compound has already been reported in the literature.<sup>3</sup>

**diethyl (bromo(4-methoxyphenyl)methyl)phosphonate (1g)**

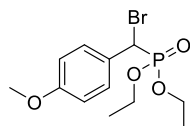

**According to Method A in Section 4.3**

**<sup>1</sup>H NMR (400 MHz, CDCl<sub>3</sub>):** δ 7.49 – 7.47 (m, 2H), 6.86 – 6.84 (m, 2H), 4.84 (d, <sup>1</sup>J<sub>P-H</sub> = 12.8 Hz, 1H), 4.27 – 4.16 (m, 2H), 4.08 – 3.98 (m, 1H), 3.90 – 3.82 (m, 1H), 3.79 (s, 1H), 1.32 (t, J = 7.1 Hz, 3H), 1.14 (t, J = 7.1 Hz, 3H). This compound has already been reported in the literature.<sup>3</sup>

**diethyl (bromo(3-methoxyphenyl)methyl)phosphonate (1h)**

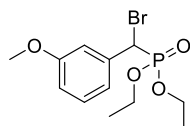

**According to Method A in Section 4.3**

**<sup>1</sup>H NMR (400 MHz, CDCl<sub>3</sub>):** δ 7.24 – 7.18 (m, 1H), 7.12 – 7.06 (m, 3H), 6.85 – 6.81 (m, 1H), 4.80 (d, <sup>1</sup>J<sub>P-H</sub> = 13.0 Hz, 1H), 4.24 – 4.14 (m, 2H), 4.11 – 3.99 (m, 1H), 3.91 – 3.81 (m, 1H), 3.78 (s, 3H), 1.33 – 1.28 (m, 3H), 1.15 – 1.10 (m, 3H). This compound has already been reported in the literature.<sup>15</sup>

### diethyl (1-bromo-3-phenylpropyl)phosphonate (1p)

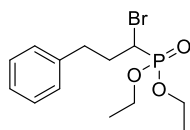

#### According to Method C in Section 4.3

<sup>1</sup>H NMR (400 MHz, CDCl<sub>3</sub>): δ 7.32 – 7.28 (m, 2H), 7.23 – 7.19 (m, 3H), 4.24 – 4.10 (m, 4H), 3.75 – 3.69 (m, 1H), 3.05 – 2.98 (m, 1H), 2.80 – 2.72 (m, 1H), 2.45 – 2.35 (m, 1H), 2.24 – 2.15 (m, 1H), 1.35 – 1.30 (m, 6H). This compound has already been reported in the literature.<sup>16</sup>

### diethyl (bromomethyl)phosphonate (1q)

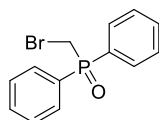

#### According to Method D in Section 4.3

<sup>1</sup>H NMR (400 MHz, CDCl<sub>3</sub>): δ 7.82 – 7.77 (m, 4H), 7.60 – 7.48 (m, 6H), 3.80 (d, <sup>1</sup>J<sub>P-H</sub> = 5.7 Hz, 2H). This compound has already been reported in the literature.<sup>6</sup>

### (2R,5S)-2-isopropyl-5-methylcyclohexyl 4-formylbenzoate (2a)

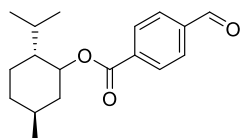

#### According to Method A in Section 4.4

<sup>1</sup>H NMR (400 MHz, CDCl<sub>3</sub>): δ 10.15 (s, 1H), 8.45 – 8.32 (m, 2H), 8.09 – 7.99 (m, 2H), 7.26 (d, *J* = 7.7, 1H), 7.14 – 7.05 (m, 1H), 6.95 (d, *J* = 1.8, 1H), 3.09 – 2.99 (m, 1H), 2.35 (s, 3H), 1.22 (d, *J* = 6.8, 6H). This compound has already been reported in the literature.<sup>7</sup>

### 6-((3r,5r,7r)-adamantan-1-yl)-4-methoxyphenyl)-2-naphthaldehyde (2b)

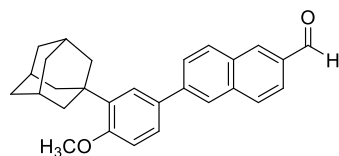

#### According to Method A in Section 4.4

<sup>1</sup>H NMR (400 MHz, CDCl<sub>3</sub>): δ 10.16 (s, 1H), 8.34 (d, *J* = 1.2, 1H), 8.04 (dd, *J* = 5.1, 3.3, 2H), 7.97 (d, *J* = 1.1, 2H), 7.84 (dd, *J* = 8.6, 1.8, 1H), 7.61 (d, *J* = 2.4, 1H), 7.56 (dd, *J* = 8.4, 2.3, 1H), 7.01 (d, *J* = 8.5, 1H), 3.91 (s, 3H), 2.19 (d, *J* = 3.0, 6H), 2.14 – 2.08 (m, 3H), 1.81 (t, *J* = 3.1, 6H). This compound has already been reported in the literature.<sup>7</sup>

### 2-(1-(4-chlorobenzoyl)-6-methoxy-2-methyl-1H-indol-3-yl)acetaldehyde (2c)

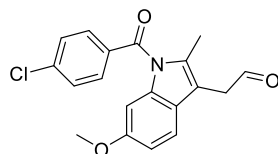

#### According to Method B in Section 4.4

<sup>1</sup>H NMR (400 MHz, CDCl<sub>3</sub>): δ 9.70 (t, *J* = 2.4 Hz, 1H), 7.67 (d, *J* = 8.6 Hz, 2H), 7.47 (d, *J* = 8.5 Hz,

2H), 6.88 – 6.84 (m, 2H), 6.68 (dd,  $J = 9.0, 2.5$  Hz, 1H), 3.82 (s, 3H), 3.72 (d,  $J = 2.4$  Hz, 2H), 2.37 (s, 3H). This compound has already been reported in the literature.<sup>8</sup>

**The following substrates have not been previously reported.**

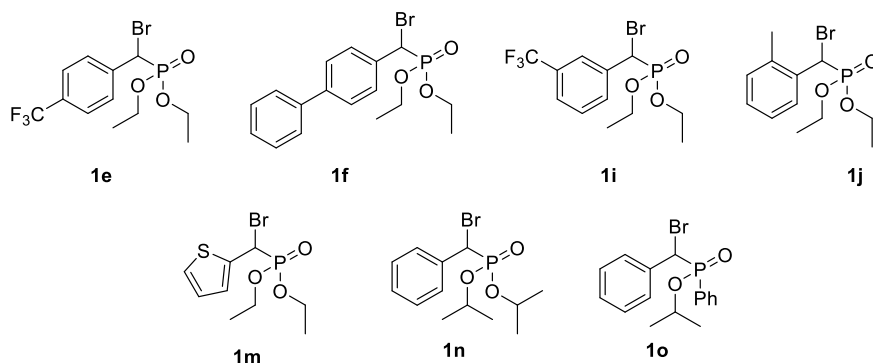

**diethyl (bromo(4-(trifluoromethyl)phenyl)methyl)phosphonate (1e)**

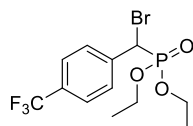

**According to Method A in Section 4.3**

**<sup>1</sup>H NMR (400 MHz, CDCl<sub>3</sub>):**  $\delta$  7.68 – 7.58 (m, 4H), 4.87 (d,  $^1J_{P-H} = 13.5$  Hz, 1H), 4.26 – 4.18 (m, 2H), 4.13 – 4.02 (m, 1H), 3.99 – 3.90 (m, 1H), 1.35 – 1.30 (m, 3H), 1.20 – 1.15 (m, 3H).

**<sup>13</sup>C NMR (101 MHz, CDCl<sub>3</sub>):**  $\delta$  138.7 (d,  $J = 3.1$  Hz), 130.9 (qd,  $J = 32.7, 2.5$  Hz), 129.9 (d,  $J = 6.3$  Hz), 125.6 – 125.5 (m), 123.7 (q,  $J = 272.4$  Hz), 64.4 (d,  $^2J_{P-C} = 7.1$  Hz), 64.1 (d,  $^2J_{P-C} = 6.9$  Hz), 40.3 (d,  $^1J_{P-C} = 158.0$  Hz), 16.3 (d,  $^3J_{P-C} = 5.8$  Hz), 16.2 (d,  $^3J_{P-C} = 5.8$  Hz).

**<sup>31</sup>P NMR (162 MHz, CDCl<sub>3</sub>):**  $\delta$  16.36.

**<sup>19</sup>F NMR (377 MHz, CDCl<sub>3</sub>):**  $\delta$  -62.84 (d,  $J = 3.5$  Hz).

**HRMS (ESI-TOF, m/z):** Found: m/z374.9969. Calcd for C<sub>12</sub>H<sub>15</sub>BrF<sub>3</sub>O<sub>3</sub>P (M+H)<sup>+</sup> 374.9967

**diethyl ([1,1'-biphenyl]-4-ylbromomethyl)phosphonate (1f)**

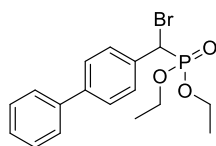

**According to Method A in Section 4.3**

**<sup>1</sup>H NMR (400 MHz, CDCl<sub>3</sub>):**  $\delta$  7.65 – 7.63 (m, 2H), 7.60 – 7.56 (m, 4H), 7.46 – 7.42 (m, 2H), 7.38 – 7.33 (m, 1H), 4.92 (d,  $^1J_{P-H} = 13.0$  Hz, 1H), 4.30 – 4.20 (m, 2H), 4.14 – 4.04 (m, 1H), 3.98 – 3.88 (m, 1H), 1.36 (t,  $J = 7.1$  Hz, 3H), 1.18 (t,  $J = 7.1$  Hz, 3H).

**<sup>13</sup>C NMR (101 MHz, CDCl<sub>3</sub>):**  $\delta$  141.7 (d,  $J_{P-C} = 2.4$  Hz), 140.1, 133.5 (d,  $J_{P-C} = 3.3$  Hz), 129.8 (d,  $J_{P-C} = 6.6$  Hz), 128.7, 127.6, 127.2 (d,  $J_{P-C} = 1.7$  Hz), 127.0, 64.1 (d,  $^2J_{P-C} = 7.0$  Hz), 64.0 (d,  $^2J_{P-C} = 6.9$  Hz), 41.2 (d,  $^1J_{P-C} = 159.6$  Hz), 16.3 (d,  $^3J_{P-C} = 5.9$  Hz), 16.1 (d,  $^3J_{P-C} = 5.8$  Hz)

**<sup>31</sup>P NMR (162 MHz, CDCl<sub>3</sub>):**  $\delta$  17.04.

**HRMS (ESI-TOF, m/z):** Found: m/z383.0406. Calcd for C<sub>17</sub>H<sub>20</sub>BrO<sub>3</sub>P (M+H)<sup>+</sup> 383.0406

**diethyl (bromo(3-(trifluoromethyl)phenyl)methyl)phosphonate (1i)**

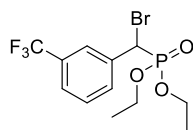

**According to Method A in Section 4.3**

**<sup>1</sup>H NMR (400 MHz, CDCl<sub>3</sub>):** δ 7.80 – 7.77 (m, 2H), 7.59 – 7.57 (m, 1H), 7.50 – 7.47 (m, 1H), 4.88 (d, <sup>1</sup>J<sub>P-H</sub> = 13.6 Hz, 1H), 4.29 – 4.17 (m, 2H), 4.13 – 4.03 (m, 1H), 4.01 – 3.91 (m, 1H), 1.33 (t, *J* = 7.1 Hz, 3H), 1.18 (t, *J* = 7.1 Hz, 3H).

**<sup>13</sup>C NMR (101 MHz, CDCl<sub>3</sub>):** δ 135.8 (d, *J* = 3.6 Hz), 132.9 (d, *J* = 6.0 Hz), 130.9 (qd, *J* = 32.5, 1.4 Hz), 129.2 (d, *J*<sub>P-C</sub> = 1.8 Hz), 126.3 – 126.2 (m), 125.8 – 125.5 (m), 123.7 (q, *J* = 272.5 Hz), 64.4 (d, <sup>2</sup>J<sub>P-C</sub> = 7.2 Hz), 64.1 (d, <sup>2</sup>J<sub>P-C</sub> = 6.9 Hz), 40.4 (d, <sup>1</sup>J<sub>P-C</sub> = 158.5 Hz), 16.3 (d, <sup>3</sup>J<sub>P-C</sub> = 5.9 Hz), 16.1 (d, <sup>3</sup>J<sub>P-C</sub> = 5.8 Hz).

**<sup>31</sup>P NMR (162 MHz, CDCl<sub>3</sub>):** δ 16.29.

**<sup>19</sup>F NMR (377 MHz, CDCl<sub>3</sub>):** δ -62.77.

**HRMS (ESI-TOF, m/z):** Found: m/z 374.9965. Calcd for C<sub>12</sub>H<sub>15</sub>BrF<sub>3</sub>O<sub>3</sub>P (M+H)<sup>+</sup> 374.9967

**diethyl (bromo(o-tolyl)methyl)phosphonate (1j)**

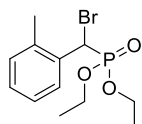

**According to Method A in Section 4.3**

**<sup>1</sup>H NMR (400 MHz, CDCl<sub>3</sub>):** δ 7.88 – 7.85 (m, 1H), 7.25 – 7.17 (m, 2H), 7.14 – 7.12 (m, 1H), 5.15 (d, <sup>1</sup>J<sub>P-H</sub> = 13.9 Hz, 1H), 4.29 – 4.14 (m, 2H), 4.09 – 4.00 (m, 1H), 3.92 – 3.81 (m, 1H), 2.38 (s, 3H), 1.34 (t, *J* = 7.0 Hz, 3H), 1.13 (t, *J* = 7.1 Hz, 3H).

**<sup>13</sup>C NMR (101 MHz, CDCl<sub>3</sub>):** δ 136.0 (d, *J*<sub>P-C</sub> = 9.1 Hz), 132.9 (d, *J*<sub>P-C</sub> = 2.5 Hz), 130.5 (d, *J*<sub>P-C</sub> = 3.9 Hz), 130.2, 128.8 (d, *J*<sub>P-C</sub> = 2.2 Hz), 126.7 (d, *J*<sub>P-C</sub> = 2.2 Hz), 64.0 (d, <sup>2</sup>J<sub>P-C</sub> = 7.0 Hz), 63.9 (d, <sup>2</sup>J<sub>P-C</sub> = 6.9 Hz), 37.4 (d, <sup>1</sup>J<sub>P-C</sub> = 161.1 Hz), 19.4, 16.3 (d, <sup>3</sup>J<sub>P-C</sub> = 5.9 Hz), 16.1 (d, <sup>3</sup>J<sub>P-C</sub> = 5.8 Hz).

**<sup>31</sup>P NMR (162 MHz, CDCl<sub>3</sub>):** δ 17.95.

**HRMS (ESI-TOF, m/z):** Found: m/z 321.0250. Calcd for C<sub>12</sub>H<sub>18</sub>BrO<sub>3</sub>P (M+H)<sup>+</sup> 321.0249

**diethyl (bromo(2-fluorophenyl)methyl)phosphonate (1k)**

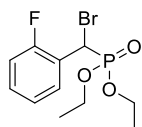

**According to Method A in Section 4.3**

**<sup>1</sup>H NMR (400 MHz, CDCl<sub>3</sub>):** δ 7.91 – 7.84 (m, 1H), 7.36 – 7.29 (m, 1H), 7.23 – 7.17 (m, 1H), 7.09 – 7.02 (m, 1H), 5.35 – 5.29 (m, 1H), 4.32 – 4.22 (m, 2H), 4.14 – 4.06 (m, 1H), 4.04 – 3.94 (m, 1H), 1.39 – 1.34 (m, 3H), 1.32 – 1.16 (m, 3H).

**<sup>13</sup>C NMR (101 MHz, CDCl<sub>3</sub>):** δ 159.4 (dd, *J* = 248.9, 8.5 Hz), 131.8 (dd, *J* = 3.9, 1.8 Hz), 130.6 (dd, *J* = 8.6, 2.2 Hz), 124.7 (dd, *J* = 4.0, 2.2 Hz), 122.3 (dd, *J* = 13.4, 2.5 Hz), 115.2 (dd, *J* = 22.1, 1.5 Hz), 64.3 (d, <sup>2</sup>J<sub>P-C</sub> = 7.0 Hz), 64.0 (d, <sup>2</sup>J<sub>P-C</sub> = 7.0 Hz), 32.1 (dd, <sup>1</sup>J<sub>P-C</sub> = 163.0, 4.0 Hz), 16.3 (d, <sup>3</sup>J<sub>P-C</sub> = 6.0 Hz), 16.1 (d, <sup>3</sup>J<sub>P-C</sub> = 5.8 Hz).

**<sup>31</sup>P NMR (162 MHz, CDCl<sub>3</sub>):** δ 16.68 (d, J = 4.0 Hz).

**<sup>19</sup>F NMR (377 MHz, CDCl<sub>3</sub>):** δ -117.37 (t, J = 5.1 Hz).

**HRMS (ESI-TOF, m/z):** Found: m/z 324.9996. Calcd for C<sub>11</sub>H<sub>15</sub>BrFO<sub>3</sub>P (M+H)<sup>+</sup> 324.9998

**diethyl (bromo(thiophen-2-yl)methyl)phosphonate (1m)**

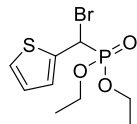

**According to Method A in Section 4.3**

**<sup>1</sup>H NMR (400 MHz, CDCl<sub>3</sub>):** δ 7.36 – 7.27 (m, 2H), 7.00 – 6.96 (m, 1H), 5.22 (d, <sup>1</sup>J<sub>P-H</sub> = 13.9, 1H), 4.28 – 4.21 (m, 2H), 4.19 – 4.11 (m, 1H), 4.08 – 3.98 (m, 1H), 1.36 – 1.32 (m, 3H), 1.26 – 1.21 (m, 3H).

**<sup>13</sup>C NMR (101 MHz, CDCl<sub>3</sub>):** δ 129.4 (d, J<sub>P-C</sub> = 7.7 Hz), 128.9 (d, J<sub>P-C</sub> = 7.5 Hz), 127.4 (dd, J = 65.6, J<sub>P-C</sub> = 2.0 Hz), 127.2 (dd, J = 61.6, J<sub>P-C</sub> = 2.0 Hz), 64.44 (d, <sup>2</sup>J<sub>P-C</sub> = 3.5 Hz), 64.37 (d, <sup>2</sup>J<sub>P-C</sub> = 3.3 Hz), 35.97 (d, <sup>1</sup>J<sub>P-C</sub> = 166.2 Hz), 16.39 (d, <sup>3</sup>J<sub>P-C</sub> = 5.9 Hz), 16.25 (d, <sup>3</sup>J<sub>P-C</sub> = 5.8 Hz).

**<sup>31</sup>P NMR (162 MHz, CDCl<sub>3</sub>):** δ 15.50 (d, J = 30.9 Hz).

**HRMS (ESI-TOF, m/z):** Found: m/z 334.9479. Calcd for C<sub>9</sub>H<sub>14</sub>BrO<sub>3</sub>PS (M+H)<sup>+</sup> 334.9476

**diisopropyl (bromo(phenyl)methyl)phosphonate (1n)**

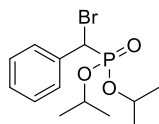

**According to Method A in Section 4.3**

**<sup>1</sup>H NMR (400 MHz, CDCl<sub>3</sub>):** δ 7.61 – 7.50 (m, 2H), 7.38 – 7.24 (m, 3H), 4.96 – 4.68 (m, 2H), 4.61 – 4.37 (m, 1H), 1.34 (d, J = 6.2 Hz, 3H), 1.31 (d, J = 6.2 Hz, 3H), 1.25 (d, J = 6.2 Hz, 3H), 0.94 (d, J = 6.2 Hz, 3H).

**<sup>13</sup>C NMR (101 MHz, CDCl<sub>3</sub>):** δ 134.9 (d, J<sub>P-C</sub> = 3.0 Hz), 129.5 (d, J<sub>P-C</sub> = 6.6 Hz), 128.8 (d, J<sub>P-C</sub> = 2.1 Hz), 128.5 (d, J<sub>P-C</sub> = 1.6 Hz), 72.7 (d, <sup>2</sup>J<sub>P-C</sub> = 7.1 Hz), 72.6 (d, <sup>2</sup>J<sub>P-C</sub> = 7.2 Hz), 42.1 (d, <sup>1</sup>J<sub>P-C</sub> = 160.9 Hz), 24.2 (d, <sup>3</sup>J<sub>P-C</sub> = 2.8 Hz), 24.1 (d, <sup>3</sup>J<sub>P-C</sub> = 3.2 Hz), 23.68 (d, <sup>3</sup>J<sub>P-C</sub> = 5.9 Hz), 23.0 (d, <sup>3</sup>J<sub>P-C</sub> = 6.1 Hz).

**<sup>31</sup>P NMR (162 MHz, CDCl<sub>3</sub>):** δ 15.52.

**HRMS (ESI-TOF, m/z):** Found: m/z 357.0225. Calcd for C<sub>13</sub>H<sub>20</sub>BrO<sub>3</sub>P (M+Na)<sup>+</sup> 357.0223

**isopropyl (bromo(phenyl)methyl)(phenyl)phosphinate (1o, dr: 1: 1.1)**

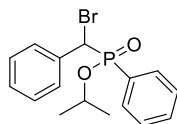

**According to Method B in Section 4.3**

**<sup>1</sup>H NMR (400 MHz, CDCl<sub>3</sub>):** δ 7.74 – 7.69 (m, 2H), 7.57 – 7.52 (m, 3H), 7.47 – 7.39 (m, 5H), 7.34 – 7.27 (m, 7H), 7.21 – 7.17 (m, 3H), 4.8 – 4.81 (m, 3H), 4.69 – 4.60 (m, 1H), 1.47 (d, J = 6.1 Hz, 3H), 1.27 (d, J = 6.2 Hz, 3H), 1.19 (d, J = 2.0 Hz, 3H), 1.18 (d, J = 2.0 Hz, 3H).

**<sup>13</sup>C NMR (101 MHz, CDCl<sub>3</sub>):** δ 134.3, 134.2, 134.1, 134.0, 132.7 (d, J<sub>P-C</sub> = 9.4 Hz), 132.6, 132.5 (d, J<sub>P-C</sub> = 9.4 Hz), 132.4, 129.8 (d, J<sub>P-C</sub> = 5.3 Hz), 129.7 (d, J<sub>P-C</sub> = 5.6 Hz), 128.7 (d, J<sub>P-C</sub> = 2.3 Hz), 128.6 (d, J<sub>P-C</sub> = 2.5 Hz), 128.3 (d, J<sub>P-C</sub> = 1.7 Hz), 128.2 (d, J<sub>P-C</sub> = 2.2 Hz), 128.1 (d, J<sub>P-C</sub> = 7.1 Hz), 128.0 (d, J

$J_{P-C} = 6.9$  Hz), 71.7 (t,  $^2J_{P-C} = 6.4$  Hz), 46.4, 46.2 (d,  $^1J_{P-C} = 101.7$  Hz), 24.2 (d,  $^3J_{P-C} = 4.3$  Hz), 24.1 (d,  $^3J_{P-C} = 4.3$  Hz), 24.0 (d,  $^3J_{P-C} = 4.0$  Hz), 23.8 (d,  $^3J_{P-C} = 4.3$  Hz).

$^{31}\text{P}$  NMR (162 MHz,  $\text{CDCl}_3$ ):  $\delta$  31.41, 31.35.

HRMS (ESI-TOF,  $m/z$ ): Found:  $m/z$  375.0120. Calcd for  $\text{C}_{16}\text{H}_{18}\text{BrO}_2\text{P}$  ( $\text{M}+\text{Na}$ ) $^+$  375.0122

**diethyl (2-(4-nitrophenyl)-2-oxo-1-phenylethyl)phosphonate(3a)**

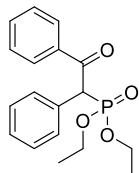

**According to Method A in Section 4.5**

$^1\text{H}$  NMR (400 MHz,  $\text{CDCl}_3$ ):  $\delta$  7.96 – 7.94 (m, 2H), 7.55-7.49 (m, 3H), 7.43-7.39 (m, 2H), 7.36 – 7.27(m, 3H), 5.34 (d,  $^1J_{P-H} = 22.3$  Hz, 1H), 4.16 – 4.00 (m, 4H), 1.23-1.17 (m, 6H).

$^{13}\text{C}$  NMR (101 MHz,  $\text{CDCl}_3$ ):  $\delta$  193.6 (d,  $^2J_{P-C} = 5.2$  Hz), 136.5 (d,  $J_{P-C} = 5.6$  Hz), 133.3, 131.4 (d,  $J_{P-C} = 9.1$  Hz), 129.6 (d,  $J_{P-C} = 6.4$  Hz), 128.9, 128.8 (d,  $J_{P-C} = 2.7$  Hz), 128.6, 127.8 (d,  $J_{P-C} = 3.3$  Hz), 63.2 (d,  $^2J_{P-C} = 6.8$  Hz), 62.9 (d,  $^2J_{P-C} = 7.1$  Hz), 54.3 (d,  $^1J_{P-C} = 138.2$  Hz), 16.3 (d,  $^3J_{P-C} = 3.4$  Hz), 16.2 (d,  $^3J_{P-C} = 3.5$  Hz).

$^{31}\text{P}$  NMR (162 MHz,  $\text{CDCl}_3$ ):  $\delta$  19.69.

HRMS (ESI-TOF,  $m/z$ ): Found:  $m/z$  333.1250. Calcd for  $\text{C}_{18}\text{H}_{21}\text{O}_4\text{P}$  ( $\text{M}+\text{H}$ ) $^+$  333.1250

**diethyl (2-(4-nitrophenyl)-2-oxo-1-phenylethyl)phosphonate(3b)**

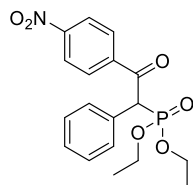

**According to Method A in Section 4.5**

$^1\text{H}$  NMR (400 MHz,  $\text{CDCl}_3$ ):  $\delta$  8.26 – 8.24 (m, 2H), 8.11 – 8.08 (m, 2H), 7.51 – 7.49 (m, 2H), 7.38 – 7.30 (m, 3H), 5.28 (d,  $^1J_{P-H} = 22.7$  Hz, 1H), 4.17 – 4.01 (m, 4H), 1.23 – 1.18 (m, 6H).

$^{13}\text{C}$  NMR (101 MHz,  $\text{CDCl}_3$ ):  $\delta$  192.3 (d,  $^2J_{P-C} = 5.2$  Hz), 150.2, 141.0 (d,  $J_{P-C} = 5.4$  Hz), 130.5 (d,  $J_{P-C} = 9.0$  Hz), 129.9, 129.6 (d,  $J_{P-C} = 6.1$  Hz), 128.5 (d,  $J_{P-C} = 3.0$  Hz), 128.3 (d,  $J_{P-C} = 3.2$  Hz), 123.8, 63.6 (d,  $^2J_{P-C} = 6.8$  Hz), 63.2 (d,  $^2J_{P-C} = 7.3$  Hz), 55.0 (d,  $^1J_{P-C} = 137.7$  Hz), 16.3 (d,  $^3J_{P-C} = 3.4$  Hz), 16.2 (d,  $^3J_{P-C} = 3.6$  Hz).

$^{31}\text{P}$  NMR (162 MHz,  $\text{CDCl}_3$ ):  $\delta$  18.35.

HRMS (ESI-TOF,  $m/z$ ): Found:  $m/z$  400.0905. Calcd for  $\text{C}_{18}\text{H}_{20}\text{NO}_6\text{P}$  ( $\text{M}+\text{Na}$ ) $^+$  400.0920

**diethyl (2-(4-cyanophenyl)-2-oxo-1-phenylethyl)phosphonate(3c)**

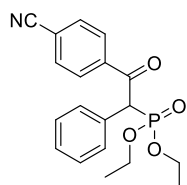

**According to Method A in Section 4.5**

$^1\text{H}$  NMR (400 MHz,  $\text{CDCl}_3$ ):  $\delta$  8.03Z (d,  $J = 8.5$  Hz, 2H), 7.71 (d,  $J = 8.5$  Hz, 2H), 7.51 – 7.48 (m, 2H), 7.38 – 7.29 (m, 3H), 5.26 (d,  $^1J_{P-H} = 22.6$  Hz, 1H), 4.11 – 4.00 (m, 4H), 1.22-1.17 (m, 6H).

**<sup>13</sup>C NMR (101 MHz, CDCl<sub>3</sub>):** δ 192.4 (d, <sup>2</sup>J<sub>P-C</sub> = 5.1 Hz), 139.5(d, J<sub>P-C</sub> = 5.5 Hz), 132.4, 130.6 (d, J<sub>P-C</sub> = 9.0 Hz), 129.6 (d, J<sub>P-C</sub> = 6.2 Hz), 129.2, 129.0 (d, J<sub>P-C</sub> = 2.6 Hz), 128.2 (d, J<sub>P-C</sub> = 3.2 Hz), 117.7, 116.5, 63.5 (d, <sup>2</sup>J<sub>P-C</sub> = 6.7 Hz), 63.1 (d, <sup>2</sup>J<sub>P-C</sub> = 7.2 Hz), 54.7 (d, <sup>1</sup>J<sub>P-C</sub> = 137.7 Hz), 16.3 (d, <sup>3</sup>J<sub>P-C</sub> = 3.7 Hz), 16.2 (d, <sup>3</sup>J<sub>P-C</sub> = 3.8 Hz).

**<sup>31</sup>P NMR (162 MHz, CDCl<sub>3</sub>):** δ 18.53.

**HRMS (ESI-TOF, m/z):** Found: m/z 358.1199. Calcd for C<sub>19</sub>H<sub>20</sub>NO<sub>4</sub>P (M+H)<sup>+</sup> 358.1202

**diethyl (2-oxo-1-phenyl-2-(4-(trifluoromethyl)phenyl)ethyl)phosphonate(3d)**

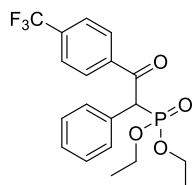

**According to Method A in Section 4.5**

**<sup>1</sup>H NMR (400 MHz, CDCl<sub>3</sub>):** δ 8.05 (d, J = 8.1 Hz, 2H), 7.67 (d, J = 8.2 Hz, 2H), 7.51 (d, J = 7.3 Hz, 2H), 7.37-7.28(m, 3H), 5.31 (d, <sup>1</sup>J<sub>P-H</sub> = 22.5 Hz, 1H), 4.16-4.01 (m, 4H), 1.23-1.18 (m, 6H).

**<sup>13</sup>C NMR (101 MHz, CDCl<sub>3</sub>):** δ 192.7 (d, J = 5.2 Hz), 139.2 (d, J = 5.5 Hz), 134.5(q, J = 32.6 Hz), 130.8 (d, J = 9.0 Hz), 129.6 (d, J = 6.2 Hz), 128.9 (d, J = 2.5 Hz), 128.1 (d, J = 3.1 Hz), 126.1(q, J = 273.7 Hz), 125.6 (d, J = 3.7 Hz), 63.4 (d, <sup>2</sup>J<sub>P-C</sub> = 6.7 Hz), 63.1 (d, <sup>2</sup>J<sub>P-C</sub> = 7.1 Hz), 54.6 (d, <sup>1</sup>J<sub>P-C</sub> = 138.1 Hz), 16.3 (d, <sup>3</sup>J<sub>P-C</sub> = 4.0 Hz), 16.2 (d, <sup>3</sup>J<sub>P-C</sub> = 4.1 Hz).

**<sup>31</sup>P NMR (162 MHz, CDCl<sub>3</sub>):** 18.85.

**<sup>19</sup>F NMR (377 MHz, CDCl<sub>3</sub>):** δ -63.24.

**HRMS (ESI-TOF, m/z):** Found: m/z 423.0945. Calcd for C<sub>19</sub>H<sub>20</sub>F<sub>3</sub>O<sub>4</sub>P (M+Na)<sup>+</sup> 423.0943

**methyl 4-(2-(diethoxyphosphoryl)-2-phenylacetyl)benzoate(3e)**

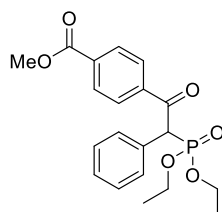

**According to Method A in Section 4.5**

**<sup>1</sup>H NMR (400 MHz, CDCl<sub>3</sub>):** δ 8.06 (d, J = 8.4 Hz, 2H), 7.99 (d, J = 8.4 Hz, 2H), 7.53 – 7.51 (m, 2H), 7.36 – 7.28 (m, 3H), 5.32 (d, <sup>1</sup>J<sub>P-H</sub> = 22.4 Hz, 1H), 4.15-4.00 (m, 4H), 3.91 (s, 3H), 1.21-1.17 (m, 6H).

**<sup>13</sup>C NMR (101 MHz, CDCl<sub>3</sub>):** δ 193.2 (d, <sup>2</sup>J<sub>P-C</sub> = 5.2 Hz), 165.9, 139.7 (d, J<sub>P-C</sub> = 5.4 Hz), 133.9, 130.9 (d, J<sub>P-C</sub> = 8.9 Hz), 129.7 (d, J<sub>P-C</sub> = 3.6 Hz), 129.6, 128.8 (d, J<sub>P-C</sub> = 2.5 Hz), 128.7, 128.0 (d, J<sub>P-C</sub> = 3.0 Hz), 63.3 (d, <sup>2</sup>J<sub>P-C</sub> = 6.7 Hz), 63.0 (d, <sup>2</sup>J<sub>P-C</sub> = 7.1 Hz), 54.6 (d, <sup>1</sup>J<sub>P-C</sub> = 137.9 Hz), 52.4, 16.2 (d, <sup>3</sup>J<sub>P-C</sub> = 2.7 Hz), 16.1 (d, <sup>3</sup>J<sub>P-C</sub> = 2.7 Hz).

**<sup>31</sup>P NMR (162 MHz, CDCl<sub>3</sub>):** δ 19.07.

**HRMS (ESI-TOF, m/z):** Found: m/z 413.1129. Calcd for C<sub>20</sub>H<sub>23</sub>O<sub>6</sub>P (M+Na)<sup>+</sup> 413.1124

**diethyl (2-(4-acetylphenyl)-2-oxo-1-phenylethyl)phosphonate(3f)**

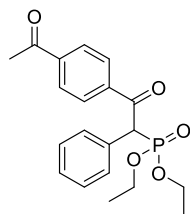

**According to Method A in Section 4.5**

**<sup>1</sup>H NMR (400 MHz, CDCl<sub>3</sub>):** δ 8.02 (d, *J* = 8.6 Hz, 2H), 7.97 (d, *J* = 8.5 Hz, 2H), 7.53 – 7.50 (m, 2H), 7.37 – 7.29 (m, 3H), 5.32 (d, <sup>1</sup>*J*<sub>P-H</sub> = 22.4 Hz, 1H), 4.16 – 4.00 (m, 4H), 2.60 (s, 3H), 1.23 – 1.18 (m, 6H).

**<sup>13</sup>C NMR (101 MHz, CDCl<sub>3</sub>):** δ 197.2, 193.1 (d, <sup>2</sup>*J*<sub>P-C</sub> = 5.4 Hz), 140.1, 139.7 (d, *J*<sub>P-C</sub> = 5.5 Hz), 131.0 (d, *J*<sub>P-C</sub> = 8.9 Hz), 129.6 (d, *J*<sub>P-C</sub> = 6.2 Hz), 129.1, 128.9 (d, *J*<sub>P-C</sub> = 2.8 Hz), 128.4, 128.0 (d, *J*<sub>P-C</sub> = 3.2 Hz), 63.3 (d, <sup>2</sup>*J*<sub>P-C</sub> = 6.7 Hz), 63.0 (d, <sup>2</sup>*J*<sub>P-C</sub> = 7.1 Hz), 54.7 (d, <sup>1</sup>*J*<sub>P-C</sub> = 138.0 Hz), 26.8, 16.2 (d, <sup>2</sup>*J*<sub>P-C</sub> = 3.4 Hz), 16.2 (d, <sup>2</sup>*J*<sub>P-C</sub> = 3.4 Hz).

**<sup>31</sup>P NMR (162 MHz, CDCl<sub>3</sub>):** δ 19.02.

**HRMS (ESI-TOF, *m/z*):** Found: *m/z* 397.1184. Calcd for C<sub>20</sub>H<sub>23</sub>O<sub>5</sub>P (M+Na)<sup>+</sup> 397.1175

**diethyl (2-(4-fluorophenyl)-2-oxo-1-phenylethyl)phosphonate(3g).**

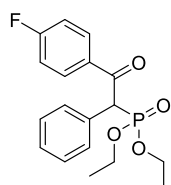

**According to Method A in Section 4.5**

**<sup>1</sup>H NMR (400 MHz, CDCl<sub>3</sub>):** δ 8.01– 7.97 (m, 2H), 7.54 – 7.51 (m, 2H), 7.37 – 7.25 (m, 3H), 7.10 – 7.06 (m, 2H), 5.29 (d, <sup>1</sup>*J*<sub>P-H</sub> = 22.3 Hz, 1H), 4.19 – 3.99 (m, 5H), 1.23-1.18 (m, 6H).

**<sup>13</sup>C NMR (101 MHz, CDCl<sub>3</sub>):** δ 192.0 (d, *J* = 5.1 Hz), 165.7 (d, *J* = 255.9 Hz), 132.7 (dd, *J* = 5.6, 3.0 Hz), 131.6 (d, *J* = 9.5 Hz), 131.2 (d, *J* = 9.1 Hz), 129.5 (d, *J* = 6.2 Hz), 128.7 (d, *J* = 2.8 Hz), 127.9 (d, *J* = 3.2 Hz), 115.6 (d, *J* = 22.0 Hz), 63.2 (d, <sup>2</sup>*J*<sub>P-C</sub> = 6.6 Hz), 62.8 (d, <sup>2</sup>*J*<sub>P-C</sub> = 7.1 Hz), 54.3 (d, <sup>1</sup>*J*<sub>P-C</sub> = 138.2 Hz), 16.2 (d, <sup>3</sup>*J*<sub>P-C</sub> = 4.0 Hz), 16.1 (d, <sup>3</sup>*J*<sub>P-C</sub> = 4.1 Hz).

**<sup>31</sup>P NMR (162 MHz, CDCl<sub>3</sub>):** δ 19.35.

**<sup>19</sup>F NMR (377 MHz, CDCl<sub>3</sub>):** δ -104.34.

**HRMS (ESI-TOF, *m/z*):** Found: *m/z* 351.1157. Calcd for C<sub>18</sub>H<sub>20</sub>FO<sub>4</sub>P (M+H)<sup>+</sup> 351.1156

**diethyl (2-(4-chlorophenyl)-2-oxo-1-phenylethyl)phosphonate(3h)**

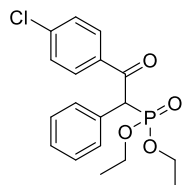

**According to Method A in Section 4.5**

**<sup>1</sup>H NMR (400 MHz, CDCl<sub>3</sub>):** δ 7.89 – 7.87 (m, 2H), 7.51 – 7.49 (m, 2H), 7.38 – 7.28 (m, 5H), 5.26 (d, <sup>1</sup>*J*<sub>P-H</sub> = 22.4 Hz, 1H), 4.15 – 3.99 (m, 4H), 1.22 – 1.17 (m, 6H).

**<sup>13</sup>C NMR (101 MHz, CDCl<sub>3</sub>):** δ 192.4 (d, <sup>2</sup>*J*<sub>P-C</sub> = 5.1 Hz), 139.9, 134.8 (d, *J*<sub>P-C</sub> = 5.7 Hz), 131.2 (d, *J*<sub>P-C</sub> = 9.0 Hz), 130.3, 129.6 (d, *J*<sub>P-C</sub> = 6.3 Hz), 128.9, 128.1 (d, *J*<sub>P-C</sub> = 2.9 Hz), 128.0 (d, *J*<sub>P-C</sub> = 3.3

Hz). 63.2 (d,  $^2J_{P-C} = 6.8$  Hz), 62.9 (d,  $^2J_{P-C} = 7.1$  Hz), 54.3 (d,  $^1J_{P-C} = 138.2$  Hz), 16.2 (d,  $^3J_{P-C} = 4.0$  Hz), 16.2 (d,  $^3J_{P-C} = 4.0$  Hz).

$^{31}\text{P}$  NMR (162 MHz,  $\text{CDCl}_3$ ):  $\delta$  19.25.

HRMS (ESI-TOF,  $m/z$ ): Found:  $m/z$  389.0682. Calcd for  $\text{C}_{18}\text{H}_{20}\text{ClO}_4\text{P}$  ( $\text{M}+\text{Na}$ ) $^+$  389.0679

**diethyl (2-(4-bromophenyl)-2-oxo-1-phenylethyl)phosphonate(3i)**

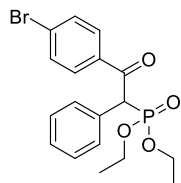

**According to Method A in Section 4.5**

$^1\text{H}$  NMR (400 MHz,  $\text{CDCl}_3$ ):  $\delta$  7.81 (d,  $J = 8.5$  Hz, 2H), 7.54 (d,  $J = 8.5$  Hz, 2H), 7.51 – 7.49 (m, 2H), 7.36–7.28 (m, 3H), 5.25 (d,  $^2J_{P-H} = 22.4$  Hz, 1H), 4.17 – 3.99 (m, 4H), 1.22–1.17 (m, 6H).

$^{13}\text{C}$  NMR (101 MHz,  $\text{CDCl}_3$ ):  $\delta$  192.6(d,  $^1J_{P-C} = 5.1$  Hz), 135.1 (d,  $J_{P-C} = 5.6$  Hz), 131.9, 131.1 (d,  $J_{P-C} = 9.0$  Hz), 130.4, 129.6 (d,  $J_{P-C} = 6.2$  Hz), 128.8(d,  $J_{P-C} = 2.6$  Hz), 128.6, 128.0 (d,  $J_{P-C} = 3.2$  Hz), 63.3 (d,  $^2J_{P-C} = 6.7$  Hz), 62.9 (d,  $^2J_{P-C} = 7.1$  Hz), 54.3 (d,  $^1J_{P-C} = 138.3$  Hz), 16.3(d,  $^1J_{P-C} = 3.6$  Hz), 16.2 (d,  $^1J_{P-C} = 3.7$  Hz).

$^{31}\text{P}$  NMR (162 MHz,  $\text{CDCl}_3$ ):  $\delta$  19.24.

HRMS (ESI-TOF,  $m/z$ ): Found:  $m/z$  433.0166. Calcd for  $\text{C}_{18}\text{H}_{20}\text{BrO}_4\text{P}$  ( $\text{M}+\text{Na}$ ) $^+$  433.0174

**diethyl (2-([1,1'-biphenyl]-4-yl)-2-oxo-1-phenylethyl)phosphonate (3j)**

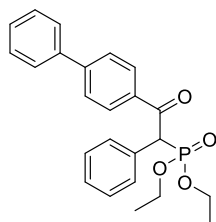

**According to Method A in Section 4.5**

$^1\text{H}$  NMR (400 MHz,  $\text{CDCl}_3$ ):  $\delta$  8.03 (d,  $J = 8.5$  Hz, 2H), 7.63 (d,  $J = 8.5$  Hz, 2H), 7.59 – 7.55 (m, 4H), 7.46–7.43 (m, 2H), 7.40–7.34 (m, 3H), 7.31 – 7.27 (m, 1H), 5.37 (d,  $^1J_{P-H} = 22.2$  Hz, 1H), 4.21 – 4.02 (m, 4H), 1.25–1.19 (m, 6H).

$^{13}\text{C}$  NMR (101 MHz,  $\text{CDCl}_3$ ):  $\delta$  193.0 (d,  $^2J_{P-C} = 5.2$  Hz), 146.0, 139.5, 135.0 (d,  $J_{P-C} = 5.7$  Hz), 131.4(d,  $J_{P-C} = 9.1$  Hz), 129.6, 129.6, 129.5, 128.8, 128.7 (d,  $J_{P-C} = 2.7$  Hz), 128.2, 127.8 (d,  $J_{P-C} = 3.2$  Hz), 127.1 (d,  $J_{P-C} = 1.7$  Hz), 63.2 (d,  $^2J_{P-C} = 6.7$  Hz), 62.9 (d,  $^2J_{P-C} = 7.1$  Hz), 54.3(d,  $^1J_{P-C} = 138.4$  Hz), 16.3 (d,  $^2J_{P-C} = 3.6$  Hz), 16.2 (d,  $^2J_{P-C} = 3.6$  Hz).

$^{31}\text{P}$  NMR (162 MHz,  $\text{CDCl}_3$ ):  $\delta$  19.75.

HRMS (ESI-TOF,  $m/z$ ): Found:  $m/z$  409.1564. Calcd for  $\text{C}_{24}\text{H}_{25}\text{O}_4\text{P}$  ( $\text{M}+\text{H}$ ) $^+$  409.1563

**diethyl (2-oxo-2-(4-phenoxyphenyl)-1-phenylethyl)phosphonate(3k)**

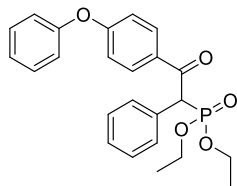

**According to Method A in Section 4.5**

**<sup>1</sup>H NMR (400 MHz, CDCl<sub>3</sub>):** δ 7.93 (d, *J* = 8.9 Hz, 2H), 7.52 – 7.50 (m, 2H), 7.40 – 7.27 (m, 5H), 7.21-7.17 (m, 1H), 7.04 – 7.02 (m, 2H), 6.93 (d, *J* = 8.9 Hz, 2H), 5.28 (d, <sup>1</sup>*J*<sub>P-H</sub> = 22.1 Hz, 1H), 4.20 – 4.00 (m, 4H), 1.24-1.18 (m, 6H).

**<sup>13</sup>C NMR (101 MHz, CDCl<sub>3</sub>):** δ 192.0 (d, <sup>2</sup>*J*<sub>P-C</sub> = 5.2 Hz), 162.3, 155.1, 131.6 (d, *J*<sub>P-C</sub> = 9.1 Hz), 131.3, 130.8 (d, *J*<sub>P-C</sub> = 5.8 Hz), 130.0, 129.6 (d, *J*<sub>P-C</sub> = 6.2 Hz), 128.7 (d, *J*<sub>P-C</sub> = 2.7 Hz), 127.8 (d, *J*<sub>P-C</sub> = 3.2 Hz), 124.7, 120.3, 117.1, 63.2 (d, <sup>2</sup>*J*<sub>P-C</sub> = 6.7 Hz), 62.8 (d, <sup>2</sup>*J*<sub>P-C</sub> = 7.1 Hz), 54.2 (d, <sup>1</sup>*J*<sub>P-C</sub> = 138.7 Hz), 16.3 (d, <sup>2</sup>*J*<sub>P-C</sub> = 4.9 Hz), 16.2 (d, <sup>2</sup>*J*<sub>P-C</sub> = 5.1 Hz).

**<sup>31</sup>P NMR (162 MHz, CDCl<sub>3</sub>):** δ 19.83.

**HRMS (ESI-TOF, *m/z*):** Found: *m/z* 425.1521. Calcd for C<sub>24</sub>H<sub>25</sub>O<sub>5</sub>P (M+H)<sup>+</sup> 425.1512

**diethyl (2-oxo-1-phenyl-2-(p-tolyl)ethyl)phosphonate(3l)**

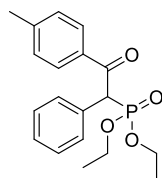

**According to Method A in Section 4.5**

**<sup>1</sup>H NMR (400 MHz, CDCl<sub>3</sub>):** δ 7.85 (d, *J* = 8.3 Hz, 2H), 7.53 – 7.50 (m, 2H), 7.34 – 7.27 (m, 3H), 7.20 (d, *J* = 8.1 Hz, 2H), 5.31 (d, <sup>1</sup>*J*<sub>P-H</sub> = 22.1 Hz, 1H), 4.18 – 3.96 (m, 4H), 2.36 (s, 3H), 1.23-1.17 (m, 6H).

**<sup>13</sup>C NMR (101 MHz, CDCl<sub>3</sub>):** δ 193.1 (d, <sup>2</sup>*J*<sub>P-C</sub> = 5.2 Hz), 144.3, 133.9 (d, *J*<sub>P-C</sub> = 5.7 Hz), 131.6 (d, *J*<sub>P-C</sub> = 9.0 Hz), 129.6 (d, *J*<sub>P-C</sub> = 6.2 Hz), 129.2, 129.0, 128.7 (d, *J*<sub>P-C</sub> = 2.8 Hz), 127.7 (d, *J*<sub>P-C</sub> = 3.3 Hz), 63.1 (d, <sup>2</sup>*J*<sub>P-C</sub> = 6.7 Hz), 62.9 (d, <sup>2</sup>*J*<sub>P-C</sub> = 7.0 Hz), 54.2 (d, <sup>1</sup>*J*<sub>P-C</sub> = 138.5 Hz), 21.5, 16.3 (d, <sup>3</sup>*J*<sub>P-C</sub> = 3.8 Hz), 16.2 (d, <sup>3</sup>*J*<sub>P-C</sub> = 3.8 Hz).

**<sup>31</sup>P NMR (162 MHz, CDCl<sub>3</sub>):** δ 19.97.

**HRMS (ESI-TOF, *m/z*):** Found: *m/z* 347.1405. Calcd for C<sub>19</sub>H<sub>23</sub>O<sub>4</sub>P (M+H)<sup>+</sup> 347.1406

**diethyl (2-(4-methoxyphenyl)-2-oxo-1-phenylethyl)phosphonate (3m)**

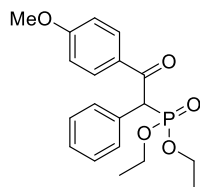

**According to Method A in Section 4.5**

**<sup>1</sup>H NMR (400 MHz, CDCl<sub>3</sub>):** δ 7.95 (d, *J* = 8.6 Hz, 2H), 7.54 – 7.52 (m, 2H), 7.36 – 7.27 (m, 3H), 6.88 (d, *J* = 8.6 Hz, 2H), 5.30 (d, <sup>1</sup>*J*<sub>P-H</sub> = 22.1 Hz, 1H), 4.18 – 4.01 (m, 4H), 3.83 (s, 3H), 1.26 – 1.18 (m, 6H).

**<sup>13</sup>C NMR (101 MHz, CDCl<sub>3</sub>):** δ 192.0 (d, <sup>2</sup>*J*<sub>P-C</sub> = 5.2 Hz), 163.7, 131.8 (d, *J*<sub>P-C</sub> = 9.1 Hz), 131.3, 129.6 (d, *J*<sub>P-C</sub> = 6.3 Hz), 129.3 (d, *J*<sub>P-C</sub> = 5.7 Hz), 128.7 (d, *J*<sub>P-C</sub> = 2.7 Hz), 127.7 (d, *J*<sub>P-C</sub> = 3.2 Hz),

113.78, 63.1 (d,  $^2J_{P-C} = 6.7$  Hz), 62.8 (d,  $^2J_{P-C} = 7.1$  Hz), 55.4, 54.0 (d,  $^1J_{P-C} = 138.6$  Hz), 16.3 (d,  $^3J_{P-C} = 4.7$  Hz), 16.2 (d,  $^3J_{P-C} = 4.7$  Hz).

$^{31}\text{P}$  NMR (162 MHz,  $\text{CDCl}_3$ ):  $\delta$  20.08.

HRMS (ESI-TOF,  $m/z$ ): Found:  $m/z$  385.1175. Calcd for  $\text{C}_{19}\text{H}_{23}\text{O}_5\text{P}$  ( $\text{M}+\text{Na}$ ) $^+$  385.1175

**diethyl (2-(3-chlorophenyl)-2-oxo-1-phenylethyl)phosphonate (3n)**

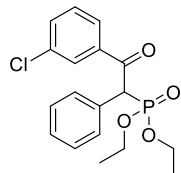

According to Method A in Section 4.5

$^1\text{H}$  NMR (400 MHz,  $\text{CDCl}_3$ ):  $\delta$  7.93 (s, 1H), 7.81 (d,  $J = 7.8$  Hz, 1H), 7.53 – 7.48 (m, 3H), 7.37 – 7.29 (m, 4H), 5.27 (d,  $^1J_{P-H} = 22.4$  Hz, 1H), 4.15 – 4.00 (m, 4H), 1.23 – 1.18 (m, 6H).

$^{13}\text{C}$  NMR (101 MHz,  $\text{CDCl}_3$ ):  $\delta$  192.4 (d,  $^2J_{P-C} = 5.3$  Hz), 138.0 (d,  $J_{P-C} = 5.6$  Hz), 134.9, 133.2, 130.9 (d,  $J_{P-C} = 9.0$  Hz), 129.8, 129.6 (d,  $J_{P-C} = 6.2$  Hz), 128.9, 128.8 (d,  $J_{P-C} = 2.7$  Hz), 128.0 (d,  $J_{P-C} = 3.3$  Hz), 126.9, 63.3 (d,  $^2J_{P-C} = 6.8$  Hz), 63.0 (d,  $^2J_{P-C} = 7.1$  Hz), 54.4 (d,  $^1J_{P-C} = 137.9$  Hz), 16.2 (d,  $^3J_{P-C} = 3.2$  Hz), 16.2 (d,  $^3J_{P-C} = 3.5$  Hz).

$^{31}\text{P}$  NMR (162 MHz,  $\text{CDCl}_3$ ):  $\delta$  19.08.

HRMS (ESI-TOF,  $m/z$ ): Found:  $m/z$  389.0679. Calcd for  $\text{C}_{18}\text{H}_{20}\text{ClO}_4\text{P}$  ( $\text{M}+\text{Na}$ ) $^+$  389.0679

**diethyl (2-(3-bromophenyl)-2-oxo-1-phenylethyl)phosphonate (3o)**

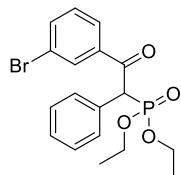

According to Method A in Section 4.5

$^1\text{H}$  NMR (400 MHz,  $\text{CDCl}_3$ ):  $\delta$  8.09 (t,  $J = 1.9$  Hz, 1H), 7.86 (d,  $J = 7.8$  Hz, 1H), 7.64 (d,  $J = 7.9$ , 1H), 7.53 – 7.50 (m, 2H), 7.37 – 7.27 (m, 4H), 5.26 (d,  $^1J_{P-H} = 22.5$  Hz, 1H), 4.15 – 4.00 (m, 4H), 1.22 – 1.18 (m, 6H).

$^{13}\text{C}$  NMR (101 MHz,  $\text{CDCl}_3$ ):  $\delta$  192.3 (d,  $^2J_{P-C} = 5.2$  Hz), 138.2 (d,  $J_{P-C} = 5.5$  Hz), 136.1, 131.8, 130.9 (d,  $J_{P-C} = 9.0$  Hz), 130.1, 129.6 (d,  $J_{P-C} = 6.2$  Hz), 128.8 (d,  $J_{P-C} = 2.7$  Hz), 128.0 (d,  $J_{P-C} = 3.3$  Hz), 127.4, 122.9, 63.3 (d,  $^2J_{P-C} = 6.7$  Hz), 63.0 (d,  $^2J_{P-C} = 7.0$  Hz), 54.4 (d,  $^1J_{P-C} = 137.8$  Hz), 16.2 (d,  $^3J_{P-C} = 2.9$  Hz), 16.2 (d,  $^3J_{P-C} = 3.0$  Hz).

$^{31}\text{P}$  NMR (162 MHz,  $\text{CDCl}_3$ ):  $\delta$  18.98.

HRMS (ESI-TOF,  $m/z$ ): Found:  $m/z$  433.0174. Calcd for  $\text{C}_{18}\text{H}_{20}\text{BrO}_4\text{P}$  ( $\text{M}+\text{Na}$ ) $^+$  433.0174

**diethyl (2-oxo-1-phenyl-2-(*m*-tolyl)ethyl)phosphonate (3p)**

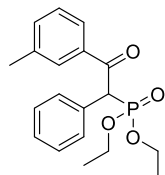

According to Method A in Section 4.5

$^1\text{H}$  NMR (400 MHz,  $\text{CDCl}_3$ ):  $\delta$  7.78 – 7.73 (m, 2H), 7.55 – 7.53 (m, 2H), 7.36 – 7.27 (m, 5H), 5.34 (d,  $^1J_{P-H} = 22.2$  Hz, 1H), 4.19 – 4.00 (m, 4H), 2.37 (s, 3H), 1.24 – 1.18 (m, 6H).

**<sup>13</sup>C NMR (101 MHz, CDCl<sub>3</sub>):** δ 192.8 (d, <sup>2</sup>J<sub>P-C</sub> = 5.2 Hz), 137.4, 135.5 (d, J<sub>P-C</sub> = 5.5 Hz), 133.1, 130.5 (d, J<sub>P-C</sub> = 9.1 Hz), 128.6 (d, J<sub>P-C</sub> = 6.3 Hz), 128.3, 127.7 (d, J<sub>P-C</sub> = 2.7 Hz), 127.4, 126.8 (d, J<sub>P-C</sub> = 3.2 Hz), 125.1, 62.1 (d, <sup>2</sup>J<sub>P-C</sub> = 6.7 Hz), 61.9 (d, <sup>2</sup>J<sub>P-C</sub> = 7.1 Hz), 53.3 (d, <sup>1</sup>J<sub>P-C</sub> = 138.1 Hz), 20.3, 15.3 (d, <sup>3</sup>J<sub>P-C</sub> = 3.4 Hz), 15.2 (d, <sup>3</sup>J<sub>P-C</sub> = 3.4 Hz).

**<sup>31</sup>P NMR (162 MHz, CDCl<sub>3</sub>):** δ 19.82.

**HRMS (ESI-TOF, m/z):** Found: m/z 369.1226. Calcd for C<sub>19</sub>H<sub>23</sub>O<sub>4</sub>P (M+Na)<sup>+</sup> 369.1226

**diethyl (2-(3-methoxyphenyl)-2-oxo-1-phenylethyl)phosphonate (3q)**

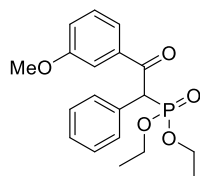

**According to Method A in Section 4.5**

**<sup>1</sup>H NMR (400 MHz, CDCl<sub>3</sub>):** δ 7.53 – 7.48 (m, 4H), 7.36 – 7.27 (m, 4H), 7.07 – 7.05 (m, 1H), 5.31 (d, <sup>1</sup>J<sub>P-H</sub> = 22.1 Hz, 1H), 4.15 – 4.00 (m, 3H), 3.81 (s, 3H), 1.25 – 1.18 (m, 7H).

**<sup>13</sup>C NMR (101 MHz, CDCl<sub>3</sub>):** δ 193.4 (d, <sup>2</sup>J<sub>P-C</sub> = 5.1 Hz), 159.7, 137.8 (d, J<sub>P-C</sub> = 5.7 Hz), 131.4 (d, J<sub>P-C</sub> = 9.1 Hz), 129.6 (d, J<sub>P-C</sub> = 6.2 Hz), 129.5, 128.8 (d, J<sub>P-C</sub> = 2.8 Hz), 127.8 (d, J<sub>P-C</sub> = 3.2 Hz), 121.5, 120.0, 113.0, 63.2 (d, <sup>2</sup>J<sub>P-C</sub> = 6.6 Hz), 62.9 (d, <sup>2</sup>J<sub>P-C</sub> = 7.1 Hz), 55.3, 54.4 (d, <sup>1</sup>J<sub>P-C</sub> = 138.4 Hz), 16.3 (d, <sup>3</sup>J<sub>P-C</sub> = 3.9 Hz), 16.2 (d, <sup>3</sup>J<sub>P-C</sub> = 3.9 Hz).

**<sup>31</sup>P NMR (162 MHz, CDCl<sub>3</sub>):** δ 19.70.

**HRMS (ESI-TOF, m/z):** Found: m/z 385.1190. Calcd for C<sub>19</sub>H<sub>23</sub>O<sub>5</sub>P (M+Na)<sup>+</sup> 385.1175

**diethyl (2-(3-cyanophenyl)-2-oxo-1-phenylethyl)phosphonate(3r)**

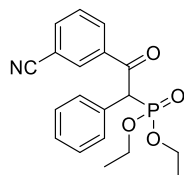

**According to Method A in Section 4.5**

**<sup>1</sup>H NMR (400 MHz, CDCl<sub>3</sub>):** δ 8.23–8.16 (m, 2H), 7.81 – 7.78 (m, 1H), 7.58 – 7.49 (m, 3H), 7.39 – 7.31 (m, 3H), 5.26 (d, <sup>1</sup>J<sub>P-H</sub> = 22.7 Hz, 1H), 4.16 – 4.01 (m, 4H), 1.23 – 1.18 (m, 6H).

**<sup>13</sup>C NMR (101 MHz, CDCl<sub>3</sub>):** δ 191.7 (d, <sup>2</sup>J<sub>P-C</sub> = 5.2 Hz), 137.3 (d, J<sub>P-C</sub> = 5.5 Hz), 136.1, 132.8, 132.5, 130.5 (d, J<sub>P-C</sub> = 9.0 Hz), 129.6, 129.6 (d, J<sub>P-C</sub> = 3.2 Hz), 129.0 (d, J<sub>P-C</sub> = 2.7 Hz), 128.3 (d, J<sub>P-C</sub> = 3.2 Hz), 117.7, 113.2, 63.5 (d, <sup>2</sup>J<sub>P-C</sub> = 6.8 Hz), 63.1 (d, <sup>2</sup>J<sub>P-C</sub> = 7.1 Hz), 54.5 (d, <sup>1</sup>J<sub>P-C</sub> = 137.8 Hz), 16.3 (d, <sup>3</sup>J<sub>P-C</sub> = 3.9 Hz), 16.2 (d, <sup>3</sup>J<sub>P-C</sub> = 4.1 Hz).

**<sup>31</sup>P NMR (162 MHz, CDCl<sub>3</sub>):** δ 18.51.

**HRMS (ESI-TOF, m/z):** Found: m/z 380.1009. Calcd for C<sub>19</sub>H<sub>20</sub>NO<sub>4</sub>P (M+Na)<sup>+</sup> 380.1022

**diethyl (2-oxo-1-phenyl-2-(o-tolyl)ethyl)phosphonate (3s)**

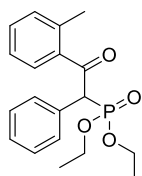

**According to Method A in Section 4.5**

**<sup>1</sup>H NMR (400 MHz, CDCl<sub>3</sub>):** δ 7.60 – 7.53 (m, 3H), 7.37 – 7.29 (m, 4H), 7.21-7.18 (m, 2H), 5.18 (d, <sup>1</sup>J<sub>P-H</sub> = 22.8 Hz, 1H), 4.17 – 3.95 (m, 4H), 2.45 (s, 3H), 1.22-1.16 (m, 6H).

**<sup>13</sup>C NMR (101 MHz, CDCl<sub>3</sub>):** δ 197.0 (d, <sup>2</sup>J<sub>P-C</sub> = 4.9 Hz), 138.5, 138.3 (d, J<sub>P-C</sub> = 4.6 Hz), 131.7, 131.4, 131.2 (d, J<sub>P-C</sub> = 8.8 Hz), 129.6 (d, J<sub>P-C</sub> = 6.4 Hz), 128.7 (d, J<sub>P-C</sub> = 2.6 Hz), 128.3, 127.9 (d, J<sub>P-C</sub> = 3.2 Hz), 125.5, 63.1 (d, <sup>2</sup>J<sub>P-C</sub> = 6.7 Hz), 62.9 (d, <sup>2</sup>J<sub>P-C</sub> = 7.2 Hz), 57.3 (d, <sup>1</sup>J<sub>P-C</sub> = 135.1 Hz), 20.9, 16.3 (d, <sup>3</sup>J<sub>P-C</sub> = 3.1 Hz), 16.2 (d, <sup>3</sup>J<sub>P-C</sub> = 3.2 Hz).

**<sup>31</sup>P NMR (162 MHz, CDCl<sub>3</sub>):** δ 19.57.

**HRMS (ESI-TOF, m/z):** Found: *m/z* 369.1208. Calcd for C<sub>19</sub>H<sub>23</sub>O<sub>4</sub>P (M+Na)<sup>+</sup> 369.1226

**diethyl (2-(4-chloro-3-methylphenyl)-2-oxo-1-phenylethyl)phosphonate (3t)**

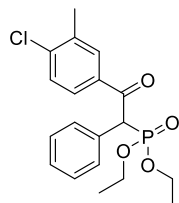

**According to Method A in Section 4.5**

**<sup>1</sup>H NMR (400 MHz, CDCl<sub>3</sub>):** δ 7.82 (s, 1H), 7.70– 7.68 (m, 1H), 7.51 – 7.50(m, 2H), 7.37 – 7.28 (m, 4H), 5.26 (d, <sup>1</sup>J<sub>P-H</sub> = 22.3 Hz, 1H), 4.17 – 3.99 (m, 4H), 2.38 (s, 3H), 1.23-1.17(m, 6H).

**<sup>13</sup>C NMR (101 MHz, CDCl<sub>3</sub>):** δ 192.7 (d, <sup>2</sup>J<sub>P-C</sub> = 5.1 Hz), 140.0, 136.6, 134.8 (d, J<sub>P-C</sub> = 5.6 Hz), 131.2, 131.2, 129.6(d, J<sub>P-C</sub> = 6.2 Hz), 129.2, 128.8 (d, J<sub>P-C</sub> = 2.6 Hz), 127.9 (d, J<sub>P-C</sub> = 3.3 Hz), 127.6, 63.2 (d, <sup>2</sup>J<sub>P-C</sub> = 6.7 Hz), 62.9 (d, <sup>2</sup>J<sub>P-C</sub> = 7.1 Hz), 54.2 (d, <sup>1</sup>J<sub>P-C</sub> = 138.3 Hz), 20.0, 16.3 (d, <sup>3</sup>J<sub>P-C</sub> = 3.8 Hz), 16.2 (d, <sup>3</sup>J<sub>P-C</sub> = 4.0 Hz).

**<sup>31</sup>P NMR (162 MHz, CDCl<sub>3</sub>):** δ 19.44.

**HRMS (ESI-TOF, m/z):** Found: *m/z* 381.1013. Calcd for C<sub>19</sub>H<sub>22</sub>ClO<sub>4</sub>P (M+Na)<sup>+</sup> 381.1017

**diethyl (2-(furan-2-yl)-2-oxo-1-phenylethyl)phosphonate(3u)**

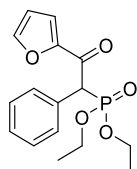

**According to Method A in Section 4.5**

**<sup>1</sup>H NMR (400 MHz, DMSO-*d*<sub>6</sub>):** δ 8.05 – 8.04 (m, 1H), 7.85 (d, *J* = 3.6 Hz, 1H), 7.61 – 7.59 (m, 3H), 7.37 – 7.27 (m, 3H), 6.74 (dd, *J* = 3.6, 1.7 Hz, 1H), 5.47 (d, <sup>1</sup>J<sub>P-H</sub> = 22.7 Hz, 1H), 4.02 – 3.87 (m, 4H), 1.13-1.07 (m, 6H).

**<sup>13</sup>C NMR (101 MHz, DMSO-*d*<sub>6</sub>):** δ 181.5 (d, <sup>2</sup>J<sub>P-C</sub> = 5.4 Hz), 151.4 (d, J<sub>P-C</sub> = 7.0 Hz), 149.7, 132.2 (d, J<sub>P-C</sub> = 8.4 Hz), 130.2 (d, J<sub>P-C</sub> = 6.6 Hz), 128.8 (d, J<sub>P-C</sub> = 2.1 Hz), 128.1 (d, J<sub>P-C</sub> = 2.7 Hz), 121.8, 113.3, 63.0 (d, <sup>2</sup>J<sub>P-C</sub> = 6.6 Hz), 62.7 (d, <sup>2</sup>J<sub>P-C</sub> = 6.9 Hz), 52.9 (d, <sup>1</sup>J<sub>P-C</sub> = 134.1 Hz), 16.5 (d, <sup>3</sup>J<sub>P-C</sub> = 5.4 Hz).

**<sup>31</sup>P NMR (162 MHz, CDCl<sub>3</sub>):** δ 18.98.

**HRMS (ESI-TOF, m/z):** Found: *m/z* 345.0858. Calcd for C<sub>16</sub>H<sub>19</sub>O<sub>5</sub>P (M+Na)<sup>+</sup> 345.0862

**diethyl (2-oxo-1-phenyl-2-(thiophen-2-yl)ethyl)phosphonate(3v)**

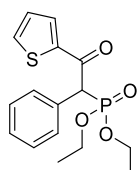

**According to Method A in Section 4.5**

**<sup>1</sup>H NMR (400 MHz, DMSO-*d*<sub>6</sub>):** δ 8.28 (dd, *J* = 3.9, 1.0 Hz, 1H), 8.06 (dd, *J* = 4.9, 0.9 Hz, 1H), 7.63 – 7.60 (m, 2H), 7.37 – 7.24 (m, 4H), 5.71 (d, <sup>1</sup>*J*<sub>P-H</sub> = 22.3 Hz, 1H), 4.01 – 3.90 (m, 4H), 1.12–1.07 (m, 6H).

**<sup>13</sup>C NMR (101 MHz, DMSO-*d*<sub>6</sub>):** δ 186.9 (d, <sup>2</sup>*J*<sub>P-C</sub> = 5.2 Hz), 143.8 (d, *J*<sub>P-C</sub> = 6.4 Hz), 137.2, 135.9, 132.5 (d, *J*<sub>P-C</sub> = 8.6 Hz), 130.2, 129.4, 128.8 (d, *J*<sub>P-C</sub> = 2.2 Hz), 128.1 (d, *J*<sub>P-C</sub> = 2.8 Hz), 62.9 (d, <sup>2</sup>*J*<sub>P-C</sub> = 6.6 Hz), 62.6 (d, <sup>2</sup>*J*<sub>P-C</sub> = 6.9 Hz), 53.5 (d, <sup>1</sup>*J*<sub>P-C</sub> = 134.2 Hz), 16.5 (d, <sup>3</sup>*J*<sub>P-C</sub> = 5.7 Hz).

**<sup>31</sup>P NMR (162 MHz, CDCl<sub>3</sub>):** δ 18.85.

**HRMS (ESI-TOF, *m/z*):** Found: *m/z* 361.0626. Calcd for C<sub>16</sub>H<sub>19</sub>O<sub>4</sub>PS (M+Na)<sup>+</sup> 361.0633

**ethyl 5-(2-(diethoxyphosphoryl)-2-phenylacetyl)-1H-pyrrole-2-carboxylate(3w)**

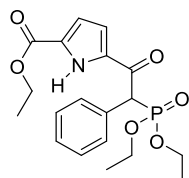

**According to Method A in Section 4.5**

**<sup>1</sup>H NMR (400 MHz, CDCl<sub>3</sub>):** δ 9.98 (s, 1H), 7.55 – 7.52 (m, 2H), 7.35 – 7.28 (m, 3H), 6.88 (dd, *J* = 4.1, 2.5 Hz, 1H), 6.83 (dd, *J* = 4.1, 2.5 Hz, 1H), 5.01 (d, <sup>1</sup>*J*<sub>P-H</sub> = 22.7 Hz, 1H), 4.33 (q, *J* = 7.1 Hz, 2H), 4.14–3.96 (m, 4H), 1.34 (t, *J* = 7.1 Hz, 3H), 1.21–1.16 (m, 6H).

**<sup>13</sup>C NMR (101 MHz, CDCl<sub>3</sub>):** δ 192.3 (d, <sup>2</sup>*J*<sub>P-C</sub> = 5.1 Hz), 150.3, 141.1 (d, *J*<sub>P-C</sub> = 5.5 Hz), 130.9, 130.5 (d, *J*<sub>P-C</sub> = 9.0 Hz), 129.9, 129.7 (d, *J*<sub>P-C</sub> = 6.1 Hz), 129.0 (d, *J*<sub>P-C</sub> = 2.8 Hz), 128.3 (d, *J*<sub>P-C</sub> = 3.2 Hz), 123.8, 63.5 (d, <sup>2</sup>*J*<sub>P-C</sub> = 6.9 Hz), 63.2 (d, <sup>2</sup>*J*<sub>P-C</sub> = 7.0 Hz), 54.9 (d, <sup>1</sup>*J*<sub>P-C</sub> = 137.8 Hz), 29.6, 22.6, 16.3 (d, <sup>3</sup>*J*<sub>P-C</sub> = 3.2 Hz), 16.2 (d, <sup>3</sup>*J*<sub>P-C</sub> = 3.4 Hz).

**<sup>31</sup>P NMR (162 MHz, CDCl<sub>3</sub>):** δ 19.00.

**HRMS (ESI-TOF, *m/z*):** Found: *m/z* 384.1368. Calcd for C<sub>21</sub>H<sub>22</sub>NO<sub>4</sub>P (M+H)<sup>+</sup> 384.1359

**diethyl (2-oxo-1-phenyl-2-(pyridin-2-yl)ethyl)phosphonate(3x)**

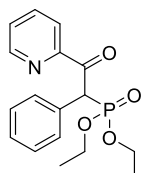

**According to Method A in Section 4.5**

**<sup>1</sup>H NMR (400 MHz, DMSO-*d*<sub>6</sub>):** δ 8.78 (dt, *J* = 4.7, 1.4 Hz, 1H), 8.04 – 8.01 (m, 2H), 7.73–7.69 (m, 1H), 7.59 – 7.56 (m, 2H), 7.37 – 7.27 (m, 3H), 6.46 (d, <sup>1</sup>*J*<sub>P-H</sub> = 22.5 Hz, 1H), 3.99–3.84 (m, 4H), 1.07–1.02 (m, 6H)

**<sup>13</sup>C NMR (101 MHz, DMSO-*d*<sub>6</sub>):** δ 194.7 (d, <sup>2</sup>*J*<sub>P-C</sub> = 4.5 Hz), 152.0 (d, *J*<sub>P-C</sub> = 3.5 Hz), 149.7, 138.5, 131.8 (d, *J*<sub>P-C</sub> = 8.5 Hz), 130.5 (d, *J*<sub>P-C</sub> = 6.6 Hz), 128.9, 128.8, 128.1 (d, *J*<sub>P-C</sub> = 2.8 Hz), 122.9, 63.0 (d, <sup>2</sup>*J*<sub>P-C</sub> = 6.6 Hz), 62.7 (d, <sup>2</sup>*J*<sub>P-C</sub> = 7.0 Hz), 49.9 (d, <sup>1</sup>*J*<sub>P-C</sub> = 133.0 Hz), 16.4 (d, <sup>3</sup>*J*<sub>P-C</sub> = 5.8 Hz).

**<sup>31</sup>P NMR (162 MHz, CDCl<sub>3</sub>):** δ 20.08.

**HRMS (ESI-TOF, *m/z*):** Found: *m/z* 356.1024. Calcd for C<sub>17</sub>H<sub>20</sub>NO<sub>4</sub>P (M+Na)<sup>+</sup> 356.1022

**diethyl (2-oxo-1-phenyl-2-(pyrazin-2-yl)ethyl)phosphonate(3y)**

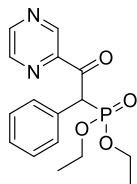

According to Method A in Section 4.5

**<sup>1</sup>H NMR (400 MHz, CDCl<sub>3</sub>):** δ 9.27 (d, *J* = 1.4 Hz, 1H), 8.73 (d, *J* = 2.5 Hz, 1H), 8.65 – 8.64(m, 1H), 7.64 – 7.61 (m, 2H), 7.35 – 7.27 (m, 3H), 6.31 (d, <sup>1</sup>*J*<sub>P-H</sub> = 22.6 Hz, 1H), 4.14– 3.99 (m, 4H), 1.20-1.15 (m, 6H).

**<sup>13</sup>C NMR (101 MHz, CDCl<sub>3</sub>):** δ 193.9 (d, <sup>2</sup>*J*<sub>P-C</sub> = 4.7 Hz), 147.9, 146.7 (d, *J*<sub>P-C</sub> = 4.3 Hz), 144.5, 143.3, 130.6 (d, *J*<sub>P-C</sub> = 8.8 Hz), 130.1 (d, *J*<sub>P-C</sub> = 6.4 Hz), 128.6 (d, *J*<sub>P-C</sub> = 2.5 Hz), 127.9 (d, *J*<sub>P-C</sub> = 3.0 Hz), 63.3 (d, <sup>2</sup>*J*<sub>P-C</sub> = 6.7 Hz), 62.9 (d, <sup>2</sup>*J*<sub>P-C</sub> = 7.1 Hz), 50.6 (d, <sup>1</sup>*J*<sub>P-C</sub> = 135.4 Hz), 16.2(d, <sup>3</sup>*J*<sub>P-C</sub> = 1.0 Hz), 16.1 (d, <sup>3</sup>*J*<sub>P-C</sub> = 1.0Hz).

**<sup>31</sup>P NMR (162 MHz, CDCl<sub>3</sub>):** δ 19.13.

**HRMS (ESI-TOF, *m/z*):** Found: *m/z* 357.0983. Calcd for C<sub>16</sub>H<sub>19</sub>N<sub>2</sub>O<sub>4</sub>P (M+Na)<sup>+</sup> 357.0974

**diethyl (2-oxo-1-phenyl-2-(pyridazin-3-yl)ethyl)phosphonate(3z)**

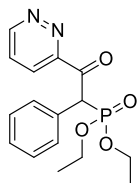

According to Method A in Section 4.5

**<sup>1</sup>H NMR (400 MHz, CDCl<sub>3</sub>):** δ 9.31 (dd, *J* = 5.0, 1.8 Hz, 1H), 8.18 (dd, *J* = 8.5, 1.8 Hz, 1H), 7.70 – 7.62 (m, 3H), 7.36 – 7.28(m, 3H), 6.64 (d, <sup>1</sup>*J*<sub>P-H</sub> = 22.6 Hz, 1H), 4.13 – 3.96 (m, 4H), 1.20 – 1.13 (m, 6H).

**<sup>13</sup>C NMR (101 MHz, CDCl<sub>3</sub>):** δ 193.3 (d, <sup>2</sup>*J*<sub>P-C</sub> = 4.9 Hz), 154.9 (d, *J*<sub>P-C</sub> = 3.9 Hz), 153.3, 130.6 (d, *J*<sub>P-C</sub> = 8.7 Hz), 130.3 (d, *J*<sub>P-C</sub> = 6.4 Hz), 128.6 (d, *J*<sub>P-C</sub> = 2.5 Hz), 127.9(d, *J*<sub>P-C</sub> = 3.0 Hz), 127.3, 125.7, 63.5(d, <sup>2</sup>*J*<sub>P-C</sub> = 6.8 Hz), 63.1 (d, <sup>2</sup>*J*<sub>P-C</sub> = 7.3 Hz), 54.9 (d, <sup>1</sup>*J*<sub>P-C</sub> = 137.7 Hz), 16.3 (d, <sup>3</sup>*J*<sub>P-C</sub> = 3.4 Hz), 16.2 (d, <sup>3</sup>*J*<sub>P-C</sub> = 3.5 Hz).

**<sup>31</sup>P NMR (162 MHz, CDCl<sub>3</sub>):** δ 19.00.

**HRMS (ESI-TOF, *m/z*):** Found: *m/z* 335.1149. Calcd for C<sub>16</sub>H<sub>19</sub>N<sub>2</sub>O<sub>4</sub>P (M+H)<sup>+</sup> 335.1155

**diethyl (2-(isoquinolin-3-yl)-2-oxo-1-phenylethyl)phosphonate (3aa)**

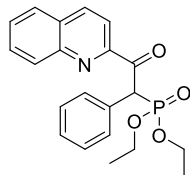

According to Method A in Section 4.5

**<sup>1</sup>H NMR (400 MHz, CDCl<sub>3</sub>):** δ 8.25-8.21 (m, 2H), 8.16 (d, *J* = 8.5 Hz, 1H), 7.84 (d, *J* = 8.1 Hz, 1H), 7.81-7.75 (m, 3H), 7.63 (t, *J* = 7.8 Hz, 1H), 7.34 (t, *J* = 7.6 Hz, 2H), 7.28 – 7.24(m, 1H), 6.85 (d, <sup>1</sup>*J*<sub>P-H</sub> = 22.0 Hz, 1H), 4.16-4.01(m, 4H), 1.21-1.11 (m, 6H).

**<sup>13</sup>C NMR (101 MHz, CDCl<sub>3</sub>):** δ 194.7 (d, <sup>2</sup>*J*<sub>P-C</sub> = 4.5 Hz), 151.6 (d, *J*<sub>P-C</sub> = 4.2 Hz), 146.8, 137.1, 131.4 (d, *J*<sub>P-C</sub> = 8.7 Hz), 130.6, 130.2 (d, *J*<sub>P-C</sub> = 6.6 Hz), 130.0, 129.6, 128.8, 128.4 (d, *J*<sub>P-C</sub> = 2.4

Hz), 127.6 (d,  $J_{P-C} = 3.0$  Hz), 127.5, 118.5, 63.0 (d,  $^2J_{P-C} = 6.6$  Hz), 62.8 (d,  $^2J_{P-C} = 7.1$  Hz), 49.9 (d,  $^1J_{P-C} = 135.6$  Hz), 16.1 (t,  $^3J_{P-C} = 5.6$  Hz).

$^{31}\text{P}$  NMR (162 MHz,  $\text{CDCl}_3$ ):  $\delta$  20.43.

HRMS (ESI-TOF,  $m/z$ ): Found:  $m/z$  406.1184. Calcd for  $\text{C}_{21}\text{H}_{22}\text{NO}_4\text{P}$  ( $\text{M}+\text{Na}$ ) $^+$  406.1178

**diethyl (2-oxo-1-phenyl-2-(quinoxalin-2-yl)ethyl)phosphonate (3ab)**

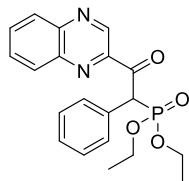

According to Method A in Section 4.5

$^1\text{H}$  NMR (400 MHz,  $\text{CDCl}_3$ ):  $\delta$  9.52 (s, 1H), 8.23-8.21 (m, 1H), 8.16 – 8.14(m, 1H), 7.91-7.83 (m,2H), 7.73– 7.71 (m, 2H), 7.37 – 7.27 (m, 3H), 6.59 (d,  $^1J_{P-H} = 22.5$  Hz, 1H), 4.16– 4.01 (m, 4H), 1.21-1.12 (m, 6H).

$^{13}\text{C}$  NMR (101 MHz,  $\text{CDCl}_3$ ):  $\delta$  194.1 (d,  $^2J_{P-C} = 4.7$  Hz), 145.3 (d,  $J_{P-C} = 4.4$  Hz), 143.9, 143.5, 140.6, 132.5, 130.8, 130.7 (d,  $J_{P-C} = 8.8$  Hz), 130.5, 130.1 (d,  $J_{P-C} = 6.4$  Hz), 129.3, 128.6 (d,  $J_{P-C} = 2.4$  Hz), 127.9 (d,  $J_{P-C} = 3.0$  Hz), 63.2 (d,  $^2J_{P-C} = 6.7$  Hz), 62.9 (d,  $^2J_{P-C} = 7.2$  Hz), 50.4 (d,  $^1J_{P-C} = 135.5$  Hz), 16.2 (d,  $^3J_{P-C} = 2.4$  Hz), 16.1 (d,  $^3J_{P-C} = 2.4$  Hz).

$^{31}\text{P}$  NMR (162 MHz,  $\text{CDCl}_3$ ):  $\delta$  19.42.

HRMS (ESI-TOF,  $m/z$ ): Found:  $m/z$  407.1120. Calcd for  $\text{C}_{20}\text{H}_{21}\text{N}_2\text{O}_4\text{P}$  ( $\text{M}+\text{Na}$ ) $^+$  407.1131

**diethyl (2-(isoquinolin-6-yl)-2-oxo-1-phenylethyl)phosphonate(3ac)**

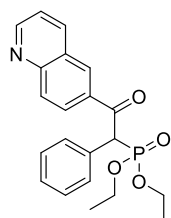

According to Method A in Section 4.5

$^1\text{H}$  NMR (400 MHz,  $\text{CDCl}_3$ ):  $\delta$  8.97 (dd,  $J = 4.2, 1.7$  Hz, 1H), 8.47 (d,  $J = 2.0$  Hz, 1H), 8.24-8.22 (m, 2H), 8.10 (d,  $J = 8.9$  Hz, 1H), 7.60-7.57(m, 2H), 7.44 (dd,  $J = 8.3, 4.2$  Hz, 1H), 7.37 – 7.28 (m, 3H), 5.48 (d,  $^1J_{P-H} = 22.5$  Hz, 1H), 4.19– 4.01 (m, 4H), 1.23-1.17 (m, 6H).

$^{13}\text{C}$  NMR (101 MHz,  $\text{CDCl}_3$ ):  $\delta$  193.0 (d,  $^2J_{P-C} = 5.2$  Hz), 152.8, 149.9, 137.6, 134.3 (d,  $J_{P-C} = 5.4$  Hz), 131.2 (d,  $J_{P-C} = 8.9$  Hz), 130.6, 130.0, 129.6 (d,  $J_{P-C} = 6.2$  Hz), 128.8 (d,  $J_{P-C} = 2.9$  Hz), 128.0, 128.0 (d,  $J_{P-C} = 2.9$  Hz), 127.3, 121.9, 63.3 (d,  $^2J_{P-C} = 6.7$  Hz), 63.0 (d,  $^2J_{P-C} = 7.1$  Hz), 54.5 (d,  $^1J_{P-C} = 137.8$  Hz), 16.2 (d,  $^3J_{P-C} = 3.6$  Hz), 16.2 (d,  $^3J_{P-C} = 3.9$  Hz).

$^{31}\text{P}$  NMR (162 MHz,  $\text{CDCl}_3$ ):  $\delta$  19.27.

HRMS (ESI-TOF,  $m/z$ ): Found:  $m/z$  378.1103. Calcd for  $\text{C}_{18}\text{H}_{20}\text{NO}_6\text{P}$  ( $\text{M}+\text{H}$ ) $^+$  378.1101

**diethyl (4-(1,3-dioxisoindolin-2-yl)-2-oxo-1-phenylbutyl)phosphonate(3ad)**

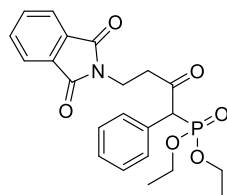

According to Method A in Section 4.5

**<sup>1</sup>H NMR (400 MHz, CDCl<sub>3</sub>):** δ 7.81 – 7.78 (m, 2H), 7.72 – 7.67 (m, 2H), 7.44 – 7.41 (m, 2H), 7.33 – 7.26 (m, 3H), 4.42 (d, <sup>1</sup>J<sub>P-H</sub> = 24.0 Hz, 1H), 4.12 – 3.85 (m, 6H), 3.18 – 2.98 (m, 2H), 1.26 – 1.16 (m, 6H).

**<sup>13</sup>C NMR (101 MHz, CDCl<sub>3</sub>):** δ 200.4 (d, <sup>2</sup>J<sub>P-C</sub> = 4.4 Hz), 167.8, 133.8, 131.9, 130.3 (d, J<sub>P-C</sub> = 7.9 Hz), 129.7 (d, J<sub>P-C</sub> = 6.9 Hz), 128.6 (d, J<sub>P-C</sub> = 2.1 Hz), 128.0 (d, J<sub>P-C</sub> = 2.8 Hz), 123.1, 63.2 (d, <sup>2</sup>J<sub>P-C</sub> = 6.9 Hz), 62.9 (d, <sup>2</sup>J<sub>P-C</sub> = 7.0 Hz), 59.3 (d, <sup>1</sup>J<sub>P-C</sub> = 132.3 Hz), 40.9 (d, <sup>3</sup>J<sub>P-C</sub> = 3.2 Hz), 32.8, 16.2 (d, <sup>3</sup>J<sub>P-C</sub> = 5.0 Hz), 16.1 (d, <sup>3</sup>J<sub>P-C</sub> = 5.1 Hz).

**<sup>31</sup>P NMR (162 MHz, CDCl<sub>3</sub>):** δ 18.51.

**HRMS (ESI-TOF, m/z):** Found: m/z 452.236. Calcd for C<sub>22</sub>H<sub>24</sub>NO<sub>6</sub>P (M+Na)<sup>+</sup> 452.1233

**diethyl (2-oxo-1,4-diphenylbutyl)phosphonate (3ae)**

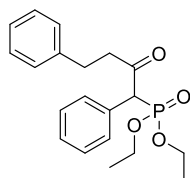

**According to Method A in Section 4.5**

**<sup>1</sup>H NMR (400 MHz, CDCl<sub>3</sub>):** δ 7.43 – 7.41 (m, 2H), 7.35 – 7.29 (m, 3H), 7.26 – 7.22 (m, 2H), 7.18 – 7.11 (m, 3H), 4.41 (d, <sup>1</sup>J<sub>P-H</sub> = 23.6 Hz, 1H), 4.08 – 3.90 (m, 4H), 3.06 – 2.80 (m, 4H), 1.23 – 1.16 (m, 6H).

**<sup>13</sup>C NMR (101 MHz, CDCl<sub>3</sub>):** δ 202.2 (d, <sup>2</sup>J<sub>P-C</sub> = 4.7 Hz), 140.5, 130.7 (d, J<sub>P-C</sub> = 8.2 Hz), 129.6 (d, J<sub>P-C</sub> = 6.9 Hz), 128.6 (d, J<sub>P-C</sub> = 2.2 Hz), 128.3, 128.3, 127.9 (d, J<sub>P-C</sub> = 2.8 Hz), 126.0, 63.2 (d, <sup>2</sup>J<sub>P-C</sub> = 6.9 Hz), 62.8 (d, <sup>2</sup>J<sub>P-C</sub> = 7.0 Hz), 59.2 (d, <sup>1</sup>J<sub>P-C</sub> = 132.5 Hz), 44.8 (d, <sup>3</sup>J<sub>P-C</sub> = 3.1 Hz), 29.5, 16.2 (d, <sup>3</sup>J<sub>P-C</sub> = 2.3 Hz), 16.1 (d, <sup>3</sup>J<sub>P-C</sub> = 2.4 Hz).

**<sup>31</sup>P NMR (162 MHz, CDCl<sub>3</sub>):** δ 18.91.

**HRMS (ESI-TOF, m/z):** Found: m/z 383.1368. Calcd for C<sub>20</sub>H<sub>25</sub>O<sub>4</sub>P (M+Na)<sup>+</sup> 383.1382

**diethyl (2-oxo-1,3-diphenylpropyl)phosphonate (3af)**

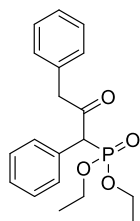

**According to Method A in Section 4.5**

**<sup>1</sup>H NMR (400 MHz, CDCl<sub>3</sub>):** δ 7.39 – 7.28 (m, 8H), 7.13 – 7.11 (m, 2H), 4.55 (d, <sup>1</sup>J<sub>P-H</sub> = 23.4 Hz, 1H), 4.13 – 4.00 (m, 4H), 3.90 (s, 2H), 1.27 – 1.19 (m, 6H).

**<sup>13</sup>C NMR (101 MHz, CDCl<sub>3</sub>):** δ 200.72 (d, <sup>2</sup>J<sub>P-C</sub> = 4.7 Hz), 133.37, 130.84 (d, J<sub>P-C</sub> = 8.3 Hz), 129.77 (d, J<sub>P-C</sub> = 6.8 Hz), 129.66, 128.67, 128.65, 127.94 (d, J<sub>P-C</sub> = 2.9 Hz), 127.18, 63.31 (d, <sup>2</sup>J<sub>P-C</sub> = 6.8 Hz), 62.91 (d, <sup>2</sup>J<sub>P-C</sub> = 7.2 Hz), 57.86 (d, <sup>1</sup>J<sub>P-C</sub> = 133.2 Hz), 50.18 (d, <sup>3</sup>J<sub>P-C</sub> = 3.4 Hz).

**<sup>31</sup>P NMR (162 MHz, CDCl<sub>3</sub>):** δ 18.74.

**HRMS (ESI-TOF, m/z):** Found: m/z 347.1403. Calcd for C<sub>19</sub>H<sub>23</sub>O<sub>4</sub>P (M+Na)<sup>+</sup> 347.1406

**diethyl (2-cyclopropyl-2-oxo-1-phenylethyl)phosphonate (3ag)**

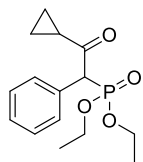

**According to Method A in Section 4.5**

**<sup>1</sup>H NMR (400 MHz, CDCl<sub>3</sub>):** δ 7.47 – 7.44 (m, 2H), 7.36 – 7.28(m, 3H), 4.55 (d, <sup>1</sup>J<sub>P-H</sub> = 23.7 Hz, 1H), 4.10 – 3.92 (m, 4H), 2.20 – 2.14 (m, 1H), 1.21 (dt, J = 23.5, 7.0 Hz, 6H), 1.12 – 1.04 (m, 2H), 0.95 – 0.84 (m, 2H).

**<sup>13</sup>C NMR (101 MHz, CDCl<sub>3</sub>):** δ 203.2 (d, <sup>2</sup>J<sub>P-C</sub> = 4.1 Hz), 131.2 (d, J<sub>P-C</sub> = 7.8 Hz), 129.9 (d, J<sub>P-C</sub> = 6.9 Hz), 128.6 (d, J<sub>P-C</sub> = 2.2 Hz), 127.8 (d, J<sub>P-C</sub> = 2.9 Hz), 63.1 (d, <sup>2</sup>J<sub>P-C</sub> = 6.8 Hz), 62.7 (d, <sup>2</sup>J<sub>P-C</sub> = 7.0 Hz), 60.1 (d, <sup>1</sup>J<sub>P-C</sub> = 133.4 Hz), 21.3 (d, J<sub>P-C</sub> = 4.1 Hz), 16.2 (d, J<sub>P-C</sub> = 4.6 Hz), 16.2 (d, J<sub>P-C</sub> = 4.6 Hz), 12.3 (d, J<sub>P-C</sub> = 3.4 Hz).

**<sup>31</sup>P NMR (162 MHz, CDCl<sub>3</sub>):** δ 19.37.

**HRMS (ESI-TOF, m/z):** Found: m/z 319.1056. Calcd for C<sub>18</sub>H<sub>20</sub>FO<sub>4</sub>P (M+Na)<sup>+</sup> 319.1069

**diethyl (1-(4-fluorophenyl)-2-oxo-2-phenylethyl)phosphonate(4a)**

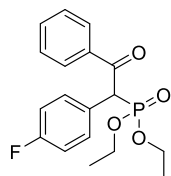

**According to Method A in Section 4.5**

**<sup>1</sup>H NMR (400 MHz, CDCl<sub>3</sub>):** δ 7.97 – 7.91 (m, 2H), 7.59 – 7.48 (m, 3H), 7.42 (m, 2H), 7.03 (t, J = 8.6 Hz, 2H), 5.33 (d, <sup>1</sup>J<sub>P-H</sub> = 22.5 Hz, 1H), 4.19 – 3.95 (m, 4H), 1.19 (m, 6H).

**<sup>13</sup>C NMR (101 MHz, CDCl<sub>3</sub>):** δ 193.4 (d, <sup>2</sup>J<sub>P-C</sub> = 5.1 Hz), 162.4 (dd, J = 247.1, J<sub>P-C</sub> = 3.6 Hz), 136.3 (d, J<sub>P-C</sub> = 5.1 Hz), 133.5, 131.3 (dd, J = 8.1, J<sub>P-C</sub> = 6.4 Hz), 128.8, 128.6, 127.2 (dd, J = 9.1, J<sub>P-C</sub> = 3.3 Hz), 115.7 (dd, J = 21.6, J<sub>P-C</sub> = 2.7 Hz), 63.2 (d, <sup>2</sup>J<sub>P-C</sub> = 6.7 Hz), 63.0 (d, <sup>2</sup>J<sub>P-C</sub> = 7.1 Hz), 53.2 (d, <sup>1</sup>J<sub>P-C</sub> = 138.0 Hz), 16.2 (d, <sup>3</sup>J<sub>P-C</sub> = 3.7 Hz), 16.1 (d, <sup>3</sup>J<sub>P-C</sub> = 4.0 Hz).

**<sup>31</sup>P NMR (162 MHz, CDCl<sub>3</sub>):** δ 19.34.

**<sup>19</sup>F NMR (377 MHz, CDCl<sub>3</sub>):** δ -114.22 (d, J = 4.9 Hz).

**HRMS (ESI-TOF, m/z):** Found: m/z 351.1151. Calcd for C<sub>18</sub>H<sub>20</sub>FO<sub>4</sub>P (M+Na)<sup>+</sup> 319.1069

**diethyl (1-(4-chlorophenyl)-2-oxo-2-phenylethyl)phosphonate(4b)**

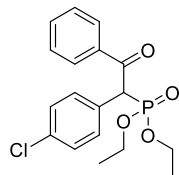

**According to Method A in Section 4.5**

**<sup>1</sup>H NMR (400 MHz, CDCl<sub>3</sub>):** δ 7.94– 7.92 (m, 2H), 7.56 – 7.40 (m, 5H), 7.31 (d, J = 8.4 Hz, 2H), 5.32 (d, <sup>1</sup>J<sub>P-H</sub> = 22.5 Hz, 1H), 4.16 – 4.00 (m, 4H), 1.23–1.17 (m, 6H).

**<sup>13</sup>C NMR (101 MHz, CDCl<sub>3</sub>):** δ 193.3 (d, <sup>2</sup>J<sub>P-C</sub> = 5.2 Hz), 136.2 (d, J<sub>P-C</sub> = 5.1 Hz), 134.0 (d, J<sub>P-C</sub> = 4.0 Hz), 133.5, 130.9 (d, J<sub>P-C</sub> = 6.3 Hz), 130.0 (d, J<sub>P-C</sub> = 9.1 Hz), 128.9 (d, J<sub>P-C</sub> = 2.8 Hz), 128.8, 128.6, 63.3 (d, <sup>2</sup>J<sub>P-C</sub> = 6.7 Hz), 63.0 (d, <sup>2</sup>J<sub>P-C</sub> = 7.2 Hz), 53.4 (d, <sup>1</sup>J<sub>P-C</sub> = 137.5 Hz), 16.3 (d, <sup>3</sup>J<sub>P-C</sub> = 4.4 Hz), 16.2 (d, <sup>3</sup>J<sub>P-C</sub> = 4.5 Hz).

<sup>31</sup>P NMR (162 MHz, CDCl<sub>3</sub>): δ 19.02.

HRMS (ESI-TOF, m/z): Found: *m/z* 367.0870. Calcd for C<sub>18</sub>H<sub>20</sub>ClO<sub>4</sub>P (M+H)<sup>+</sup> 367.0860  
diethyl (1-(4-bromophenyl)-2-oxo-2-phenylethyl)phosphonate(4c)

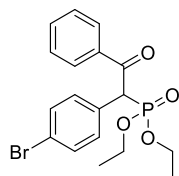

According to Method A in Section 4.5

<sup>1</sup>H NMR (400 MHz, CDCl<sub>3</sub>): δ 7.94 – 7.92 (m, 2H), 7.56 – 7.52 (m, 1H), 7.48 – 7.40 (m, 6H), 5.30 (d, <sup>1</sup>J<sub>P-H</sub> = 22.4 Hz, 1H), 4.17 – 3.98 (m, 4H), 1.23-1.17 (m, 6H).

<sup>13</sup>C NMR (101 MHz, CDCl<sub>3</sub>): δ 193.2 (d, <sup>2</sup>J<sub>P-C</sub> = 5.2 Hz), 136.2 (d, J<sub>P-C</sub> = 5.0 Hz), 133.6, 131.9 (d, J<sub>P-C</sub> = 2.8 Hz), 131.3 (d, J<sub>P-C</sub> = 6.3 Hz), 130.5 (d, J<sub>P-C</sub> = 9.2 Hz), 128.8, 128.6, 122.2 (d, J<sub>P-C</sub> = 4.1 Hz), 63.3 (d, <sup>2</sup>J<sub>P-C</sub> = 6.8 Hz), 63.1 (d, <sup>2</sup>J<sub>P-C</sub> = 7.0 Hz), 53.5 (d, <sup>1</sup>J<sub>P-C</sub> = 137.6 Hz), 16.3 (d, <sup>3</sup>J<sub>P-C</sub> = 4.4 Hz), 16.2 (d, <sup>3</sup>J<sub>P-C</sub> = 4.4 Hz).

<sup>31</sup>P NMR (162 MHz, CDCl<sub>3</sub>): δ 18.87.

HRMS (ESI-TOF, m/z): Found: *m/z* 411.0365. Calcd for C<sub>18</sub>H<sub>20</sub>BrO<sub>4</sub>P (M+H)<sup>+</sup> 411.0355  
diethyl (2-oxo-2-phenyl-1-(4-(trifluoromethyl)phenyl)ethyl)phosphonate(4d)

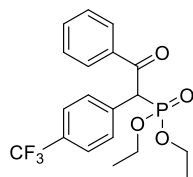

According to Method A in Section 4.5

<sup>1</sup>H NMR (400 MHz, CDCl<sub>3</sub>): δ 7.97 – 7.94 (m, 2H), 7.70-7.67 m, 2H), 7.61-7.54 m, 3H), 7.46-7.42 (m, 2H), 5.43 (d, <sup>1</sup>J<sub>P-H</sub> = 22.7 Hz, 1H), 4.15 – 4.02 (m, 4H), 1.23-1.17 (m, 6H).

<sup>13</sup>C NMR (101 MHz, CDCl<sub>3</sub>): δ 193.0 (d, J = 5.4 Hz), 136.3 (d, J = 4.6 Hz), 135.6 (d, J = 9.1 Hz), 133.7, 130.1 (d, J = 32.3 Hz), 130.2 (d, J = 6.2 Hz), 128.9, 128.7, 125.7-125.7 (m), 123.99 (q, J = 271.8 Hz), 63.45 (d, <sup>2</sup>J<sub>P-C</sub> = 6.7 Hz), 63.21 (d, <sup>2</sup>J<sub>P-C</sub> = 7.1 Hz), 53.98 (d, <sup>1</sup>J<sub>P-C</sub> = 136.3 Hz), 16.30 (d, <sup>3</sup>J<sub>P-C</sub> = 4.4 Hz), 16.23 (d, <sup>3</sup>J<sub>P-C</sub> = 4.5 Hz).

<sup>31</sup>P NMR (162 MHz, CDCl<sub>3</sub>): δ 18.51

<sup>19</sup>F NMR (377 MHz, CDCl<sub>3</sub>): δ -62.68 (d, J = 2.6 Hz).

HRMS (ESI-TOF, m/z): Found: *m/z* 401.1127. Calcd for C<sub>19</sub>H<sub>20</sub>F<sub>3</sub>O<sub>4</sub>P (M+H)<sup>+</sup> 401.1124  
diethyl (1-([1,1'-biphenyl]-4-yl)-2-oxo-2-phenylethyl)phosphonate(4e)

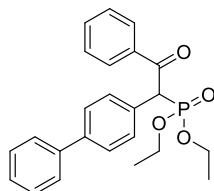

According to Method A in Section 4.5

<sup>1</sup>H NMR (400 MHz, CDCl<sub>3</sub>): δ 8.00 – 7.97 (m, 2H), 7.62 – 7.51 (m, 7H), 7.45-7.40 (m, 5H), 7.35 – 7.31 (m, 1H), 5.40 (d, <sup>1</sup>J<sub>P-H</sub> = 22.2 Hz, 1H), 4.20 – 4.03 (m, 4H), 1.26-1.21 (m, 6H).

<sup>13</sup>C NMR (101 MHz, CDCl<sub>3</sub>): δ 193.5 (d, <sup>2</sup>J<sub>P-C</sub> = 5.3 Hz), 140.7 (d, J<sub>P-C</sub> = 3.4 Hz), 140.3 (d, J<sub>P-C</sub> = 1.4 Hz), 136.4 (d, J<sub>P-C</sub> = 5.4 Hz), 133.4, 130.3 (d, J<sub>P-C</sub> = 9.3 Hz), 130.0 (d, J<sub>P-C</sub> = 6.4 Hz), 128.9,

128.7, 128.6, 127.4 (d,  $J_{P-C} = 2.9$  Hz), 127.4, 127.0, 63.2 (d,  $^2J_{P-C} = 6.7$  Hz), 63.0 (d,  $^2J_{P-C} = 7.0$  Hz), 53.9 (d,  $^1J_{P-C} = 138.1$  Hz), 16.3 (d,  $^3J_{P-C} = 2.9$  Hz), 16.2 (d,  $^3J_{P-C} = 3.0$  Hz).

$^{31}\text{P}$  NMR (162 MHz,  $\text{CDCl}_3$ ):  $\delta$  19.73.

HRMS (ESI-TOF,  $m/z$ ): Found:  $m/z$  409.1567. Calcd for  $\text{C}_{24}\text{H}_{25}\text{O}_4\text{P}$  ( $\text{M}+\text{H}$ ) $^+$  409.1563

**diethyl (1-(4-methoxyphenyl)-2-oxo-2-phenylethyl)phosphonate(4f)**

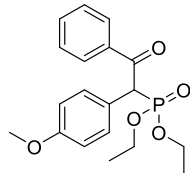

According to Method A in Section 4.5

$^1\text{H}$  NMR (400 MHz,  $\text{CDCl}_3$ ):  $\delta$  7.94 (d,  $J = 7.7$  Hz, 2H), 7.53 – 7.38 (m, 5H), 6.87 (d,  $J = 8.3$  Hz, 2H), 5.27 (d,  $^1J_{P-H} = 22.0$  Hz, 1H), 4.15 – 3.76 (m, 4H), 3.76 (s, 3H), 1.223-1.18 (m, 6H).

$^{13}\text{C}$  NMR (101 MHz,  $\text{CDCl}_3$ ):  $\delta$  193.8 (d,  $^2J_{P-C} = 4.8$  Hz), 159.2 (d,  $J_{P-C} = 3.2$  Hz), 136.4 (d,  $J_{P-C} = 5.7$  Hz), 133.2, 130.7 (d,  $J_{P-C} = 6.2$  Hz), 128.8, 128.5, 123.2 (d,  $J_{P-C} = 9.2$  Hz), 114.2 (d,  $J_{P-C} = 2.6$  Hz),  $\delta$  63.0 (d,  $^2J_{P-C} = 6.7$  Hz), 62.8 (d,  $^2J_{P-C} = 7.2$  Hz), 55.1, 53.3 (d,  $^1J_{P-C} = 139.4$  Hz), 16.3 (d,  $^3J_{P-C} = 3.3$  Hz), 16.2 (d,  $^3J_{P-C} = 3.4$  Hz).

$^{31}\text{P}$  NMR (162 MHz,  $\text{CDCl}_3$ ):  $\delta$  20.21.

HRMS (ESI-TOF,  $m/z$ ): Found:  $m/z$  385.1179. Calcd for  $\text{C}_{19}\text{H}_{23}\text{O}_5\text{P}$  ( $\text{M}+\text{Na}$ ) $^+$  385.1175

**diethyl (1-(3-methoxyphenyl)-2-oxo-2-phenylethyl)phosphonate(4g)**

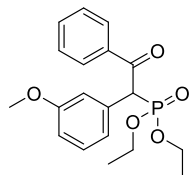

According to Method A in Section 4.5

$^1\text{H}$  NMR (400 MHz,  $\text{CDCl}_3$ ):  $\delta$  7.96 – 7.93 (m, 2H), 7.23 – 7.49 (m, 1H), 7.42-7.38 (m, 2H), 7.23 (d,  $J = 7.8$  Hz, 1H), 7.11 – 7.06 (m, 2H), 6.85 – 6.80 (m, 1H), 5.30 (d,  $^1J_{P-H} = 22.0$  Hz, 1H), 4.17 – 3.79 (m, 4H), 3.79 (s, 3H), 1.24-1.19(m, 6H).

$^{13}\text{C}$  NMR (101 MHz,  $\text{CDCl}_3$ ):  $\delta$  193.5 (d,  $^2J_{P-C} = 5.3$  Hz), 159.7 (d,  $J_{P-C} = 2.9$  Hz), 136.4 (d,  $J_{P-C} = 5.7$  Hz), 133.3, 132.6 (d,  $J_{P-C} = 9.0$  Hz), 129.6 (d,  $J_{P-C} = 2.9$  Hz), 128.8, 128.5, 122.0 (d,  $J_{P-C} = 6.5$  Hz), 115.0 (d,  $J_{P-C} = 6.0$  Hz), 113.6 (d,  $J_{P-C} = 3.3$  Hz), 63.2 (d,  $^2J_{P-C} = 6.7$  Hz), 62.9 (d,  $^2J_{P-C} = 6.9$  Hz), 55.2, 54.2 (d,  $^1J_{P-C} = 138.7$  Hz), 16.3 (d,  $^3J_{P-C} = 3.2$  Hz), 16.2 (d,  $^3J_{P-C} = 3.1$  Hz).

$^{31}\text{P}$  NMR (162 MHz,  $\text{CDCl}_3$ ):  $\delta$  19.72.

HRMS (ESI-TOF,  $m/z$ ): Found:  $m/z$  363.1353. Calcd for  $\text{C}_{19}\text{H}_{23}\text{O}_5\text{P}$  ( $\text{M}+\text{H}$ ) $^+$  363.1355

**diethyl (2-oxo-2-phenyl-1-(3-(trifluoromethyl)phenyl)ethyl)phosphonate(4h)**

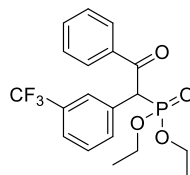

According to Method A in Section 4.5

$^1\text{H}$  NMR (400 MHz,  $\text{CDCl}_3$ ):  $\delta$  7.98 – 7.96 (m, 2H), 7.82 – 7.77 (m, 2H), 7.58 – 7.54 (m, 2H), 7.49 – 7.43 (m, 3H), 5.43 (d,  $^1J_{P-H} = 22.9$  Hz, 1H), 4.15 – 3.99 (m, 4H), 1.22-1.16 m, 6H).

$^{13}\text{C}$  NMR (101 MHz,  $\text{CDCl}_3$ ):  $\delta$  193.0 (d,  $J = 5.4$  Hz), 136.31 (d,  $J = 4.4$  Hz), 133.7, 133.1 (d,  $J = 6.3$  Hz), 132.6 (d,  $J = 9.2$  Hz), 131.47 – 130.4 (m), 128.9, 128.7, 126.58 – 126.47 (m), 124.8 – 124.6 (m), 123.8 (q,  $J = 273.7$  Hz), 63.4 (d,  $^2J_{P-C} = 6.7$  Hz), 63.1 (d,  $^2J_{P-C} = 7.1$  Hz), 53.7 (d,  $^1J_{P-C} = 135.8$  Hz), 16.2 (d,  $^3J_{P-C} = 1.9$  Hz), 16.1 (d,  $^3J_{P-C} = 1.8$  Hz).

$^{31}\text{P}$  NMR (162 MHz,  $\text{CDCl}_3$ ):  $\delta$  18.30.

$^{19}\text{F}$  NMR (377 MHz,  $\text{CDCl}_3$ ):  $\delta$  -62.62.

HRMS (ESI-TOF,  $m/z$ ): Found:  $m/z$  401.1127. Calcd for  $\text{C}_{19}\text{H}_{20}\text{F}_3\text{O}_4\text{P}$  ( $\text{M}+\text{H}$ ) $^+$  401.1124

**diethyl (2-oxo-2-phenyl-1-(o-tolyl)ethyl)phosphonate(4i)**

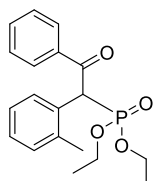

**According to Method A in Section 4.5**

$^1\text{H}$  NMR (400 MHz,  $\text{CDCl}_3$ ):  $\delta$  7.85 – 7.82 (m, 2H), 7.56 – 7.47 (m, 2H), 7.40-7.36 (m, 2H), 7.22 – 7.12 (m, 3H), 5.50 (d,  $^1J_{P-H} = 21.9$  Hz, 1H), 4.21 – 3.96 (m, 4H), 2.57 (s, 3H), 1.24 – 1.18 (m, 6H).

$^{13}\text{C}$  NMR (101 MHz,  $\text{CDCl}_3$ ):  $\delta$  194.2 (d,  $^2J_{P-C} = 5.1$  Hz), 136.4 (d,  $J_{P-C} = 6.6$  Hz), 136.1 (d,  $J_{P-C} = 7.0$  Hz), 133.2, 130.9 (d,  $J_{P-C} = 2.7$  Hz), 129.8, 129.8, 129.4 (d,  $J_{P-C} = 4.9$  Hz), 128.6, 127.9 (d,  $J_{P-C} = 3.4$  Hz), 126.4 (d,  $J_{P-C} = 3.3$  Hz), 63.0 (d,  $^2J_{P-C} = 6.7$  Hz), 62.7 (d,  $^2J_{P-C} = 7.2$  Hz), 50.4 (d,  $^1J_{P-C} = 141.4$  Hz), 20.1, 16.3 (d,  $^3J_{P-C} = 3.6$  Hz), 16.2 (d,  $^3J_{P-C} = 3.7$  Hz).

$^{31}\text{P}$  NMR (162 MHz,  $\text{CDCl}_3$ ):  $\delta$  20.99.

HRMS (ESI-TOF,  $m/z$ ): Found:  $m/z$  347.1401. Calcd for  $\text{C}_{19}\text{H}_{23}\text{O}_4\text{P}$  ( $\text{M}+\text{H}$ ) $^+$  347.1406

**diethyl (1-(2-fluorophenyl)-2-oxo-2-phenylethyl)phosphonate(4j)**

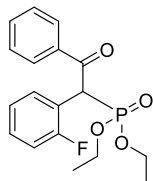

**According to Method A in Section 4.5**

$^1\text{H}$  NMR (400 MHz,  $\text{CDCl}_3$ ):  $\delta$  7.98 – 7.95 (m, 2H), 7.77 – 7.72 (m, 1H), 7.55 – 7.51 (m, 1H), 7.44 – 7.40 (m, 2H), 7.29 – 7.23 (m, 1H), 7.14 – 7.06 (m, 2H), 5.76 (d,  $^1J_{P-H} = 22.5$  Hz, 1H), 4.17 – 4.06 (m, 4H), 1.23-1.18 (m, 6H).

$^{13}\text{C}$  NMR (101 MHz,  $\text{CDCl}_3$ ):  $\delta$  193.1 (d,  $J = 5.1$  Hz), 159.8 (dd,  $J = 246.3, 7.7$  Hz), 136.0 (d,  $J = 5.4$  Hz), 133.6, 131.1 (dd,  $J = 4.7, 2.2$  Hz), 129.6 (dd,  $J = 8.4, 3.1$  Hz), 128.8, 128.6, 124.4 (t,  $J = 3.3$  Hz), 118.8 (dd,  $J = 14.4, 8.5$  Hz), 115.3 (dd,  $J = 22.6, 2.4$  Hz), 63.3 (d,  $^2J_{P-C} = 6.7$  Hz), 62.9 (d,  $^2J_{P-C} = 6.8$  Hz), 44.9 (dd,  $J = 140.9, 2.3$  Hz), 16.1 (t,  $^3J_{P-C} = 5.7$  Hz).

$^{31}\text{P}$  NMR (162 MHz,  $\text{CDCl}_3$ ):  $\delta$  19.20 (d,  $J = 5.0$  Hz).

HRMS (ESI-TOF,  $m/z$ ): Found:  $m/z$  351.1165. Calcd for  $\text{C}_{18}\text{H}_{20}\text{FO}_4\text{P}$  ( $\text{M}+\text{H}$ ) $^+$  351.1156

**diethyl (1-(naphthalen-2-yl)-2-oxo-2-phenylethyl)phosphonate (4k)**

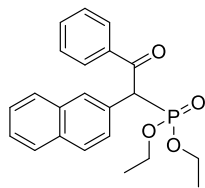

**According to Method A in Section 4.5**

**<sup>1</sup>H NMR (400 MHz, CDCl<sub>3</sub>):** δ 8.32 (d, *J* = 8.6 Hz, 1H), 7.89 – 7.83 (m, 3H), 7.80 – 7.77 (m, 1H), 7.74 – 7.71 (m, 1H), 7.68 – 7.64 (m, 1H), 7.56 – 7.52 (m, 1H), 7.45 – 7.40 (m, 2H), 7.30 – 7.26 (m, 2H), 6.11 (d, <sup>1</sup>*J*<sub>P-H</sub> = 21.7 Hz, 1H), 4.15 – 3.96 (m, 4H), 1.14 – 1.08 (m, 6H).

**<sup>13</sup>C NMR (101 MHz, CDCl<sub>3</sub>):** δ 193.9 (d, <sup>2</sup>*J*<sub>P-C</sub> = 5.1 Hz), 136.1 (d, *J*<sub>P-C</sub> = 6.7 Hz), 134.3 (d, *J*<sub>P-C</sub> = 2.4 Hz), 133.2, 131.0 (d, *J*<sub>P-C</sub> = 5.8 Hz), 129.2, 128.6 (d, *J*<sub>P-C</sub> = 3.7 Hz), 128.6, 128.5, 127.9 (d, *J*<sub>P-C</sub> = 6.3 Hz), 127.3 (d, *J*<sub>P-C</sub> = 9.1 Hz), 126.8, 125.7, 125.5 (d, *J*<sub>P-C</sub> = 4.0 Hz), 122.9 (d, *J*<sub>P-C</sub> = 1.6 Hz), 63.0 (d, <sup>2</sup>*J*<sub>P-C</sub> = 6.7 Hz), 62.4 (d, <sup>2</sup>*J*<sub>P-C</sub> = 7.2 Hz), 49.3 (d, <sup>1</sup>*J*<sub>P-C</sub> = 143.4 Hz), 16.2 (d, <sup>3</sup>*J*<sub>P-C</sub> = 6.1 Hz)

**<sup>31</sup>P NMR (162 MHz, CDCl<sub>3</sub>):** δ 20.53.

**HRMS (ESI-TOF, *m/z*):** Found: *m/z* 383.1409. Calcd for C<sub>22</sub>H<sub>23</sub>O<sub>4</sub>P (M+H)<sup>+</sup> 383.1406

**diethyl (2-oxo-2-phenyl-1-(thiophen-2-yl)ethyl)phosphonate(4l)**

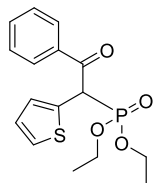

**According to Method A in Section 4.5**

**<sup>1</sup>H NMR (400 MHz, CDCl<sub>3</sub>):** δ 8.03 – 8.01 (m, 2H), 7.59 – 7.57 (m, 1H), 7.56 – 7.45 (m, 2H), 7.28 – 7.26 (m, 1H), 7.20 – 7.18 (m, 1H), 6.99 – 6.97 (m, 1H), 5.72 (d, <sup>1</sup>*J*<sub>P-H</sub> = 23.8 Hz, 1H), 4.15 – 3.98 (m, 4H), 1.22 – 1.18 (m, 6H).

**<sup>13</sup>C NMR (101 MHz, CDCl<sub>3</sub>):** δ 192.8 (d, <sup>2</sup>*J*<sub>P-C</sub> = 4.7 Hz), 136.2 (d, *J*<sub>P-C</sub> = 3.5 Hz), 133.6, 132.1 (d, *J*<sub>P-C</sub> = 11.1 Hz), 129.0, 128.6, 128.0 (d, *J*<sub>P-C</sub> = 7.8 Hz), 126.7 (d, *J*<sub>P-C</sub> = 3.5 Hz), 126.1 (d, *J*<sub>P-C</sub> = 3.9 Hz), 63.6 (d, <sup>2</sup>*J*<sub>P-C</sub> = 6.8 Hz), 63.5 (d, <sup>2</sup>*J*<sub>P-C</sub> = 7.3 Hz), 49.0 (d, <sup>1</sup>*J*<sub>P-C</sub> = 136.1 Hz), 16.2 (d, <sup>3</sup>*J*<sub>P-C</sub> = 3.0 Hz), 16.1 (d, <sup>3</sup>*J*<sub>P-C</sub> = 3.3 Hz).

**<sup>31</sup>P NMR (162 MHz, CDCl<sub>3</sub>):** δ 17.21.

**HRMS (ESI-TOF, *m/z*):** Found: *m/z* 339.0809. Calcd for C<sub>16</sub>H<sub>19</sub>O<sub>4</sub>PS (M+H)<sup>+</sup> 339.0814

**diisopropyl (2-oxo-1,2-diphenylethyl)phosphonate(4m)**

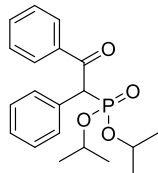

**According to Method A in Section 4.5**

**<sup>1</sup>H NMR (400 MHz, CDCl<sub>3</sub>):** δ 7.98 (d, *J* = 7.7 Hz, 2H), 7.59 – 7.51 (m, 3H), 7.44 – 7.40 (m, 2H), 7.36 – 7.27 (m, 3H), 5.31 (d, <sup>1</sup>*J*<sub>P-H</sub> = 22.6 Hz, 1H), 4.72 – 4.62 (m, 2H), 1.28 (d, *J* = 6.2 Hz, 3H), 1.23 (d, *J* = 6.2 Hz, 3H), 1.15 (d, *J* = 6.2 Hz, 3H), 1.08 (d, *J* = 6.2 Hz, 3H).

**<sup>13</sup>C NMR (101 MHz, CDCl<sub>3</sub>):** δ 193.6 (d, <sup>2</sup>*J*<sub>P-C</sub> = 5.2 Hz), 136.7 (d, *J*<sub>P-C</sub> = 5.1 Hz), 133.1, 131.5 (d, *J*<sub>P-C</sub> = 8.9 Hz), 129.8 (d, *J*<sub>P-C</sub> = 6.5 Hz), 128.8, 128.5 (d, *J*<sub>P-C</sub> = 2.7 Hz), 128.4, 127.6 (d, *J*<sub>P-C</sub> = 3.2 Hz), 71.7 (d, <sup>2</sup>*J*<sub>P-C</sub> = 7.0 Hz), 71.4 (d, <sup>2</sup>*J*<sub>P-C</sub> = 7.3 Hz), 54.6 (d, <sup>1</sup>*J*<sub>P-C</sub> = 138.5 Hz), 24.2 (d, <sup>3</sup>*J*<sub>P-C</sub> = 2.9

Hz), 23.9 (d,  $^3J_{P-C} = 3.5$  Hz), 23.5 (d,  $^3J_{P-C} = 5.7$  Hz), 23.2 (d,  $^3J_{P-C} = 6.1$  Hz).

$^{31}\text{P}$  NMR (162 MHz,  $\text{CDCl}_3$ ):  $\delta$  17.70.

HRMS (ESI-TOF, m/z): Found: m/z 383.1382. Calcd for  $\text{C}_{20}\text{H}_{25}\text{O}_4\text{P}$  ( $\text{M}+\text{Na}$ ) $^+$  383.1382

**isopropyl (2-oxo-1,2-diphenylethyl)(phenyl)phosphinate (4n, dr: 6: 1)**

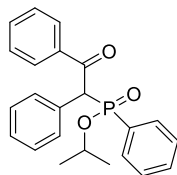

According to Method A in Section 4.5

$^1\text{H}$  NMR (400 MHz,  $\text{CDCl}_3$ ):  $\delta$  7.91 (d,  $J = 7.7$  Hz, 2H), 7.65 – 7.44 (m, 4H), 7.40 – 7.28 (m, 6H), 7.22 – 7.21 (m, 3H), 5.42 (dd,  $^1J_{P-H} = 18.8, 11.8$  Hz, 1H), 4.71 – 4.59 (m, 1H), 1.27 – 1.25 (m, 3H), 1.16 (d,  $J = 6.1$  Hz, 3H).

$^{13}\text{C}$  NMR (101 MHz,  $\text{CDCl}_3$ ):  $\delta$  194.2 (d,  $^2J_{P-C} = 3.9$  Hz), 193.9 (d,  $^2J_{P-C} = 4.4$  Hz), 137.2 (d,  $J_{P-C} = 3.9$  Hz), 137.1 (d,  $J_{P-C} = 3.8$  Hz), 133.13, 133.13, 132.8 (d,  $J_{P-C} = 9.6$ , Hz), 132.7 (d,  $J_{P-C} = 9.9$ , Hz), 132.2 (d,  $J_{P-C} = 3.0$  Hz), 132.1 (d,  $J_{P-C} = 3.0$  Hz), 131.2 (d,  $J_{P-C} = 6.6$  Hz), 131.1 (d,  $J_{P-C} = 7.0$  Hz), 130.7, 130.7, 129.9 (d,  $J_{P-C} = 5.3$  Hz), 129.8 (d,  $J_{P-C} = 6.06$  Hz), 129.4, 129.3, 128.8, 128.7, 128.8 (d,  $J_{P-C} = 7.07$  Hz), 128.4 (d,  $J_{P-C} = 8.1$  Hz), 127.8 (d,  $J_{P-C} = 13.1$  Hz), 127.7 (d,  $J_{P-C} = 13.1$  Hz), 127.6 (d,  $J_{P-C} = 3.0$  Hz), 127.6 (d,  $J_{P-C} = 3.0$  Hz), 71.0 (d,  $^2J_{P-C} = 7.0$  Hz), 70.8 (d,  $^2J_{P-C} = 6.7$  Hz), 57.9 (d,  $^1J_{P-C} = 93.6$ Hz), 57.8 (d,  $^1J_{P-C} = 95.6$ Hz), 24.2 (d,  $^3J_{P-C} = 3.03$  Hz), 24.1 (d,  $^3J_{P-C} = 4.04$  Hz), 24.0 (d,  $^3J_{P-C} = 4.04$  Hz), 23.9 (d,  $^3J_{P-C} = 5.05$  Hz).

$^{31}\text{P}$  NMR (162 MHz,  $\text{CDCl}_3$ ):  $\delta$  34.89.

HRMS (ESI-TOF, m/z): Found: m/z 379.1450. Calcd for  $\text{C}_{23}\text{H}_{23}\text{O}_3\text{P}$  ( $\text{M}+\text{H}$ ) $^+$  379.1457

**diethyl (1-oxo-1,4-diphenylbutan-2-yl)phosphonate (4o)**

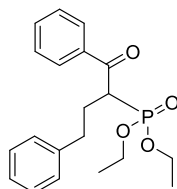

According to Method B in Section 4.5

$^1\text{H}$  NMR (400 MHz,  $\text{CDCl}_3$ ):  $\delta$  7.89 (d,  $J = 7.7$  Hz, 2H), 7.56 (t,  $J = 7.4$  Hz, 1H), 7.44 (t,  $J = 7.6$  Hz, 2H), 7.26 – 7.15 (m, 3H), 7.08 (d,  $J = 7.3$  Hz, 2H), 4.14 – 3.95 (m, 5H), 2.75 – 2.48 (m, 3H), 2.33 – 2.24 (m, 1H), 1.24 (t,  $J = 7.0$  Hz, 3H), 1.13 (t,  $J = 7.1$  Hz, 3H).

$^{13}\text{C}$  NMR (101 MHz,  $\text{CDCl}_3$ ):  $\delta$  195.9 (d,  $^2J_{P-C} = 5.4$  Hz), 140.4, 137.5 (d,  $J_{P-C} = 1.4$  Hz), 133.2, 128.6, 128.5, 128.4, 128.3, 126.1, 62.7 (d,  $^2J_{P-C} = 6.9$  Hz), 62.5 (d,  $^2J_{P-C} = 6.9$  Hz), 46.2 (d,  $^1J_{P-C} = 127.7$  Hz), 34.0 (d,  $^2J_{P-C} = 15.1$  Hz), 28.9 (d,  $^3J_{P-C} = 4.4$  Hz), 16.2 (d,  $^3J_{P-C} = 5.9$  Hz), 16.0 (d,  $^3J_{P-C} = 6.4$  Hz).

$^{31}\text{P}$  NMR (162 MHz,  $\text{CDCl}_3$ ):  $\delta$  22.19.

HRMS (ESI-TOF, m/z): Found: m/z 361.1562. Calcd for  $\text{C}_{20}\text{H}_{26}\text{O}_4\text{P}$  ( $\text{M}+\text{H}$ ) $^+$  361.1563

**diethyl (1-(4-cyanophenyl)-1-oxo-4-phenylbutan-2-yl)phosphonate (4p)**

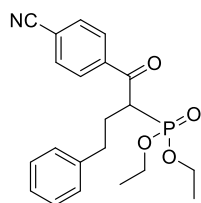

**According to Method B in Section 4.5**

**<sup>1</sup>H NMR (400 MHz, CDCl<sub>3</sub>):** δ 7.92 (d, *J* = 8.0 Hz, 2H), 7.72 (d, *J* = 8.0 Hz, 2H), 7.23–7.17 (m, 3H), 7.05–7.03 (m, 2H), 4.11–3.95 (m, 5H), 2.74–2.49 (m, 3H), 2.35–2.25 (m, 1H), 1.26 (t, *J* = 7.1 Hz, 3H), 1.15 (t, *J* = 7.1 Hz, 3H).

**<sup>13</sup>C NMR (101 MHz, CDCl<sub>3</sub>):** δ 194.8 (d, <sup>2</sup>*J*<sub>P-C</sub> = 5.6 Hz), 140.4, 139.9, 132.1, 128.9, 128.5 (d, *J*<sub>P-C</sub> = 5.9 Hz), 127.2 (d, *J*<sub>P-C</sub> = 29.9 Hz), 126.4, 117.8, 116.3, 62.9 (d, <sup>2</sup>*J*<sub>P-C</sub> = 6.9 Hz), 62.8 (d, <sup>2</sup>*J*<sub>P-C</sub> = 6.9 Hz), 46.7 (d, <sup>1</sup>*J*<sub>P-C</sub> = 127.0 Hz), 33.9 (d, <sup>2</sup>*J*<sub>P-C</sub> = 14.6 Hz), 28.5 (d, <sup>3</sup>*J*<sub>P-C</sub> = 4.4 Hz), 16.2 (d, <sup>3</sup>*J*<sub>P-C</sub> = 5.9 Hz), 16.1 (d, <sup>3</sup>*J*<sub>P-C</sub> = 6.2 Hz).

**<sup>31</sup>P NMR (162 MHz, CDCl<sub>3</sub>):** δ 21.09.

**HRMS (ESI-TOF, m/z):** Found: m/z 386.1517. Calcd for C<sub>21</sub>H<sub>25</sub>NO<sub>4</sub>P (M+H)<sup>+</sup> 386.1516

**2-(diphenylphosphoryl)-1-phenylethan-1-one (4q)**

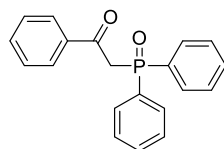

**According to Method C in Section 4.5**

**<sup>1</sup>H NMR (400 MHz, CDCl<sub>3</sub>):** δ 8.00–7.97 (m, 2H), 7.83–7.78 (m, 4H), 7.56–7.50 (m, 3H), 7.48–7.42 (m, 6H), 4.14 (d, <sup>1</sup>*J*<sub>P-H</sub> = 15.4 Hz, 2H).

**<sup>13</sup>C NMR (101 MHz, CDCl<sub>3</sub>):** δ 192.8 (d, <sup>2</sup>*J*<sub>P-C</sub> = 5.6 Hz), 136.9, 133.5, 132.1 (d, *J*<sub>P-C</sub> = 2.8 Hz), 131.9 (d, *J*<sub>P-C</sub> = 103.4 Hz), 131.1 (d, *J*<sub>P-C</sub> = 9.8 Hz), 129.2, 128.6 (d, *J*<sub>P-C</sub> = 12.3 Hz), 128.5, 43.3 (d, <sup>1</sup>*J*<sub>P-C</sub> = 57.9 Hz).

**<sup>31</sup>P NMR (162 MHz, CDCl<sub>3</sub>):** δ 17.70.

**HRMS (ESI-TOF, m/z):** Found: m/z 321.1033. Calcd for C<sub>20</sub>H<sub>17</sub>O<sub>2</sub>P (M+H)<sup>+</sup> 321.1038

**2-(diphenylphosphoryl)-1-(quinolin-6-yl)ethan-1-one (4r)**

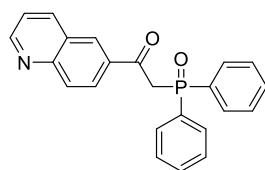

**According to Method C in Section 4.5**

**<sup>1</sup>H NMR (400 MHz, CDCl<sub>3</sub>):** δ 9.01 (dd, *J* = 4.3, 1.7 Hz, 1H), 8.63 (d, *J* = 2.1 Hz, 1H), 8.31 (d, *J* = 8.2 Hz, 1H), 8.23–8.20 (m, 1H), 8.0–8.08 (m, 1H), 7.85–7.80 (m, 4H), 7.55–7.45 (m, 7H), 4.27 (d, <sup>1</sup>*J*<sub>P-H</sub> = 15.3 Hz, 2H).

**<sup>13</sup>C NMR (101 MHz, CDCl<sub>3</sub>):** δ 192.1 (d, <sup>2</sup>*J*<sub>P-C</sub> = 5.5 Hz), 152.9, 137.9, 134.7, 132.4, 132.3, 131.7 (d, *J*<sub>P-C</sub> = 104.0 Hz), 131.9, 131.1 (d, *J*<sub>P-C</sub> = 10.1 Hz), 129.9, 128.7 (d, *J*<sub>P-C</sub> = 12.3 Hz), 127.9, 127.3, 121.9, 43.8 (d, <sup>1</sup>*J*<sub>P-C</sub> = 56.6 Hz).

**<sup>31</sup>P NMR (162 MHz, CDCl<sub>3</sub>):** δ 26.91.

**HRMS (ESI-TOF, m/z):** Found: m/z 372.1153. Calcd for C<sub>23</sub>H<sub>18</sub>NO<sub>2</sub>P (M+H)<sup>+</sup> 372.1147

**2-isopropyl-5-methylcyclohexyl 4-(2-(diethoxyphosphoryl)-2-phenylacetyl)benzoate(5, dr: > 20: 1)**

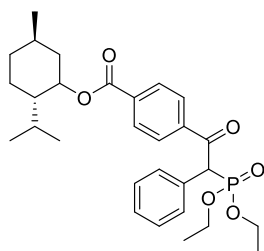

**According to Method A in Section 4.5**

**<sup>1</sup>H NMR (400 MHz, CDCl<sub>3</sub>):** δ 8.06 (d, *J* = 8.5 Hz, 2H), 7.99 (d, *J* = 8.5 Hz, 2H), 7.52-7.49 (m, 2H), 7.36–7.27 (m, 3H), 5.32 (dd, <sup>1</sup>*J*<sub>P-H</sub> = 22.4, 1.8 Hz, 1H), 4.95-4.88(m, 1H), 4.18 – 4.01 (m, 4H), 2.12-2.07 (m, 1H), 1.93-1.86 (m, 1H), 1.75-1.69 (m, 2H), 1.58-1.50 (m, 2H), 1.23-1.18 (m, 6H), 1.15 – 1.03 (m, 2H), 0.91 (t, *J* = 7.3 Hz, 7H), 0.76 (d, *J* = 7.0 Hz, 3H).

**<sup>13</sup>C NMR (101 MHz, CDCl<sub>3</sub>):** δ 193.2 (d, <sup>2</sup>*J*<sub>P-C</sub> = 5.2 Hz), 165.0, 139.5 (dd, *J* = 5.6, 2.4 Hz), 134.7 (d, *J*<sub>P-C</sub> = 1.1 Hz), 131.0 (dd, *J* = 9.0, 2.5 Hz), 129.7 (d, *J*<sub>P-C</sub> = 2.7 Hz), 129.6, 128.9 (d, *J*<sub>P-C</sub> = 2.8 Hz), 128.7 (d, *J*<sub>P-C</sub> = 2.1 Hz), 128.0 (d, *J*<sub>P-C</sub> = 3.2 Hz), δ 75.5, 63.3 (d, <sup>2</sup>*J*<sub>P-C</sub> = 6.7 Hz), 63.0 (d, <sup>2</sup>*J*<sub>P-C</sub> = 7.0 Hz), 54.7 (d, <sup>1</sup>*J*<sub>P-C</sub> = 138.4 Hz), 47.1, 40.8, 34.2, 31.4, 26.4 (d, *J*<sub>P-C</sub> = 5.3 Hz), 23.5 (d, *J*<sub>P-C</sub> = 5.4 Hz), 21.9, 20.7 (d, *J*<sub>P-C</sub> = 2.8 Hz), 16.4 (d, *J*<sub>P-C</sub> = 5.1 Hz), 16.3 (d, <sup>3</sup>*J*<sub>P-C</sub> = 3.1 Hz), 16.2 (d, <sup>3</sup>*J*<sub>P-C</sub> = 3.2 Hz).

**<sup>31</sup>P NMR (162 MHz, CDCl<sub>3</sub>):** δ 19.20.

**HRMS (ESI-TOF, m/z):** Found: *m/z* 515.2560. Calcd for C<sub>29</sub>H<sub>39</sub>O<sub>6</sub>P (M+H)<sup>+</sup> 515.2557

**diethyl(3-(1-(4-chlorobenzoyl)-5-methoxy-2-methyl-1H-indol-3-yl)-2-oxo-1-phenylpropyl)phosphonate (6)**

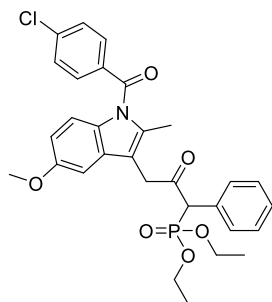

**According to Method A in Section 4.5**

**<sup>1</sup>H NMR (400 MHz, CDCl<sub>3</sub>):** δ 7.61 – 7.59 (m, 2H), 7.46 – 7.44 (m, 2H), 7.34 – 7.29 (m, 5H), 6.90-6.87 (m, 1H), 6.76-6.75 (m, 1H), 6.67 – 6.64 (m, 1H), 4.56 (d, <sup>1</sup>*J*<sub>P-H</sub> = 22.7 Hz, 1H), 4.12 – 3.96 (m, 4H), 3.95 – 3.85 (m, 2H), 3.74 (s, 3H), 2.16 (s, 3H), 1.23 – 1.18 (m, 6H).

**<sup>13</sup>C NMR (101 MHz, CDCl<sub>3</sub>):** δ 200.1 (d, <sup>2</sup>*J*<sub>P-C</sub> = 4.5 Hz), 168.1, 156.1, 139.2, 136.3, 133.7, 131.1, 130.8 (d, *J*<sub>P-C</sub> = 8.5 Hz), 130.6 (d, *J*<sub>P-C</sub> = 27.4 Hz), 129.5 (d, *J*<sub>P-C</sub> = 6.6 Hz), 129.0, 128.6 (d, *J*<sub>P-C</sub> = 2.4 Hz), 128.0 (d, *J*<sub>P-C</sub> = 3.0 Hz), 115.0, 112.0, 111.7, 100.8, 63.3 (d, <sup>2</sup>*J*<sub>P-C</sub> = 6.9 Hz), 62.9 (d, <sup>2</sup>*J*<sub>P-C</sub> = 7.2 Hz), 57.5 (d, <sup>1</sup>*J*<sub>P-C</sub> = 133.9 Hz), 55.6, 39.3 (d, <sup>3</sup>*J*<sub>P-C</sub> = 3.8 Hz), 16.2 (d, <sup>3</sup>*J*<sub>P-C</sub> = 6.0 Hz), 13.2.

**<sup>31</sup>P NMR (162 MHz, CDCl<sub>3</sub>):** δ 18.69.

**HRMS (ESI-TOF, m/z):** Found: *m/z* 568.1653. Calcd for C<sub>30</sub>H<sub>31</sub>ClNO<sub>6</sub>P (M+H)<sup>+</sup> 568.1650

**diethyl(2-(6-(3-((3*r*,5*r*,7*r*)-adamantan-1-yl)-4-methoxyphenyl)naphthalen-2-yl)-2-oxo-1-phenylethyl)phosphonate (7)**

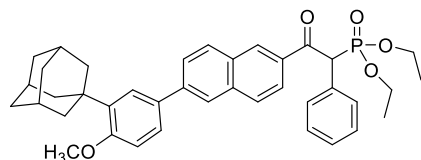

**According to Method A in Section 4.5**

**<sup>1</sup>H NMR (400 MHz, CDCl<sub>3</sub>):** δ 8.50 (d, *J* = 1.8 Hz, 1H), 8.03 (dd, *J* = 8.7, 1.8 Hz, 1H), 7.97 – 7.95 (m, 2H), 7.88 (d, *J* = 8.7 Hz, 1H), 7.79 (dd, *J* = 8.5, 1.8 Hz, 1H), 7.64 – 7.61 (m, 2H), 7.59 (d, *J* = 2.4 Hz, 1H), 7.53 (dd, *J* = 8.4, 2.3 Hz, 1H), 7.39 – 7.35 (m, 2H), 7.32 – 7.27 (m, 1H), 6.99 (d, *J* = 8.5 Hz, 1H), 5.53 (d, <sup>1</sup>*J*<sub>P-H</sub> = 22.3 Hz, 1H), 4.20 – 4.04 (m, 4H), 3.90 (s, 3H), 2.18 (d, *J* = 3.1 Hz, 6H), 2.10 (d, *J* = 3.3 Hz, 2H), 1.81 (d, *J* = 3.1 Hz, 6H), 1.22 (q, *J* = 7.3 Hz, 6H).

**<sup>13</sup>C NMR (101 MHz, CDCl<sub>3</sub>):** δ 193.3 (d, <sup>2</sup>*J*<sub>P-C</sub> = 5.2 Hz), 158.9, 141.9, 138.9, 136.0, 133.3 (d, *J*<sub>P-C</sub> = 5.5 Hz), 132.2, 131.6 (d, *J*<sub>P-C</sub> = 9.0 Hz), 131.0, 130.7, 130.0, 129.7 (d, *J*<sub>P-C</sub> = 6.3 Hz), 128.7 (d, *J* = 2.6 Hz), 128.5, 127.8 (d, *J*<sub>P-C</sub> = 3.2 Hz), 126.5, 125.8, 125.7, 124.6, 124.5, 112.0, 63.2 (d, <sup>2</sup>*J*<sub>P-C</sub> = 6.7 Hz), 62.9 (d, <sup>2</sup>*J*<sub>P-C</sub> = 7.1 Hz), 55.1, 54.2 (d, <sup>1</sup>*J*<sub>P-C</sub> = 137.8 Hz), 40.5, 37.1, 37.0, 29.0, 16.3 (d, <sup>3</sup>*J*<sub>P-C</sub> = 2.9 Hz), 16.2 (d, <sup>3</sup>*J*<sub>P-C</sub> = 3.0 Hz).

**<sup>31</sup>P NMR (162 MHz, CDCl<sub>3</sub>):** δ 19.88.

**HRMS (ESI-TOF, *m/z*):** Found: *m/z* 623.2927. Calcd for C<sub>39</sub>H<sub>43</sub>O<sub>5</sub>P (M+H)<sup>+</sup> 623.2920

**diethyl (1-(4-(4-methyl-1,2,3,4,5,6-hydroindeno[1,2-b]furan-2-yl)phenyl)-2-oxo-1,2-diphenylethyl)phosphonate (8)**

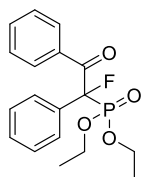

**According to Method A in Section 4.7**

**<sup>1</sup>H NMR (400 MHz, CDCl<sub>3</sub>):** δ 7.854– 7.81 (m, 2H), 7.67 – 7.64 (m, 2H), 7.51 – 7.33 (m, 6H), 4.27 – 4.08 (m, 4H), 1.30 – 1.23(m, 6H).

**<sup>13</sup>C NMR (101 MHz, CDCl<sub>3</sub>):** δ 194.4 (dd, *J* = 24.0, *J* = 1.9 Hz), 134.47 – 133.98 (m), 133.4, 132.5 (dd, *J* = 20.2, 2.8 Hz), 129.9 (d, *J* = 6.1 Hz), 129.0 (d, *J* = 3.0 Hz), 128.6 (t, *J* = 2.3 Hz), 128.2, 124.8 (dd, *J* = 9.0, 4.2 Hz), 100.9 (dd, *J* = 201.0, 171.5 Hz), 64.4 (d, <sup>2</sup>*J*<sub>P-C</sub> = 3.8 Hz), 64.3 (d, <sup>2</sup>*J*<sub>P-C</sub> = 4.1 Hz), 16.3 (d, <sup>3</sup>*J*<sub>P-C</sub> = 3.9 Hz), 16.2 (d, <sup>3</sup>*J*<sub>P-C</sub> = 3.6 Hz).

**<sup>31</sup>P NMR (162 MHz, CDCl<sub>3</sub>):** δ 11.52 (d, *J* = 85.5 Hz).

**<sup>19</sup>F NMR (377 MHz, CDCl<sub>3</sub>):** δ -169.80 (d, *J* = 86.0 Hz).

**HRMS (ESI-TOF, *m/z*):** Found: *m/z* 351.1166. Calcd for C<sub>18</sub>H<sub>20</sub>FO<sub>4</sub>P (M+H)<sup>+</sup> 351.1156

**(1-(naphthalen-1-yl)-2-oxo-2-phenylethyl)phosphonic acid (9)**

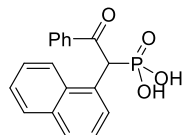

**According to Method C in Section 4.7**

**<sup>1</sup>H NMR (400 MHz, DMSO):** δ 8.42 (d, *J* = 8.5 Hz, 1H), 8.00 – 7.82 (m, 5H), 7.62 – 7.42 (m, 6H), 6.22 (d, <sup>1</sup>*J*<sub>P-H</sub> = 22.8 Hz, 1H).

**<sup>13</sup>C NMR (101 MHz, DMSO):** δ 194.8 (d, <sup>2</sup>*J*<sub>P-C</sub> = 5.5 Hz), 136.7 (d, *J*<sub>P-C</sub> = 4.4 Hz), 133.6, 133.2, 131.2 (d, *J*<sub>P-C</sub> = 6.7 Hz), 129.6 (d, *J*<sub>P-C</sub> = 7.8 Hz), 128.7, 128.6, 128.4, 128.0 (d, *J*<sub>P-C</sub> = 6.0 Hz), 127.5 (d, *J*<sub>P-C</sub> = 2.8 Hz), 126.5, 125.55, 125.2 (d, *J*<sub>P-C</sub> = 2.9 Hz), 123.6, 49.1 (d, <sup>1</sup>*J*<sub>P-C</sub> = 131.2 Hz).

**<sup>31</sup>P NMR (162 MHz, DMSO):**  $\delta$  14.89.

**HRMS (ESI-TOF, m/z):** Found: m/z 349.0594. Calcd for C<sub>18</sub>H<sub>15</sub>O<sub>4</sub>P (M+Na)<sup>+</sup> 349.0600  
**diethyl (2-hydroxy-1,2-diphenylethyl)phosphonate(10, dr: > 20: 1)**

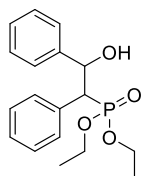

**According to Method B in Section 4.7**

**<sup>1</sup>H NMR (400 MHz, CDCl<sub>3</sub>):**  $\delta$  7.18 – 7.10 (m, 10H), 5.29 – 5.23 (m, 1H), 4.63 (d,  $J = 3.2$  Hz, 1H), 4.11 – 3.40 (m, 4H), 3.44 (dd,  $^1J_{P-H} = 19.7, 9.2$  Hz, 1H), 1.23 (t,  $J = 7.1$  Hz, 3H), 1.16 (t,  $J = 7.0$  Hz, 3H).

**<sup>13</sup>C NMR (101 MHz, CDCl<sub>3</sub>):**  $\delta$  141.5 (d,  $J_{P-C} = 14.2$  Hz), 134.1 (d,  $J_{P-C} = 6.8$  Hz), 129.7 (d,  $J_{P-C} = 6.7$  Hz), 128.2 (d,  $J_{P-C} = 2.1$  Hz), 127.8, 127.4, 127.1 (d,  $J_{P-C} = 2.7$  Hz), 126.6, 75.0 (d,  $^2J_{P-C} = 3.8$  Hz), 62.9 (d,  $^2J_{P-C} = 7.1$  Hz), 62.3 (d,  $^2J_{P-C} = 7.0$  Hz), 53.3 (d,  $^1J_{P-C} = 132.9$  Hz), 16.2 (t,  $^3J_{P-C} = 5.8$  Hz).

**<sup>13</sup>C NMR (101 MHz, Chloroform-d)**  $\delta$  75.01 (d,  $J = 3.8$  Hz), 62.99 (d,  $J = 7.1$  Hz), 62.36 (d,  $J = 7.0$  Hz), 53.34 (d,  $J = 132.9$  Hz), 16.20 (t,  $J = 5.8$  Hz).

**<sup>31</sup>P NMR (162 MHz, CDCl<sub>3</sub>):**  $\delta$  27.18.

**HRMS (ESI-TOF, m/z):** Found: m/z 357.1225. Calcd for C<sub>18</sub>H<sub>23</sub>O<sub>4</sub>P (M+H)<sup>+</sup> 357.1226  
**diethyl (2-amino-1,4-diphenylbutyl)phosphonate (11, dr: 9 : 1)**

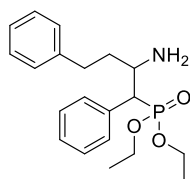

**According to Method D in Section 4.7**

**<sup>1</sup>H NMR (400 MHz, CDCl<sub>3</sub>):**  $\delta$  7.43 – 7.41 (m, 2H), 7.36 – 7.31 (m, 3H), 7.30 – 7.24 (m, 2H), 7.18 – 7.16 (m, 3H), 4.15 – 4.03 (m, 2H), 3.93 – 3.83 (m, 1H), 3.71 – 3.62 (m, 1H), 3.56 – 3.49 (m, 1H), 3.12 (dd,  $^1J_{P-H} = 23.4, 4.0$  Hz, 1H), 2.82 – 2.64 (m, 2H), 1.94 – 1.89 (m, 1H), 1.80 – 1.72 (m, 1H), 1.57 – 1.47 (m, 1H), 1.28 (t,  $J = 7.1$  Hz, 3H), 1.00 (t,  $J = 7.1$  Hz, 3H).

**<sup>13</sup>C NMR (101 MHz, CDCl<sub>3</sub>):**  $\delta$  141.7, 132.9 (d,  $J_{P-C} = 4.3$  Hz), 130.5 (d,  $J_{P-C} = 8.3$  Hz), 128.4 (d,  $J_{P-C} = 1.3$  Hz), 128.3, 128.3, 127.5 (d,  $J_{P-C} = 2.1$  Hz), 125.8, 62.8 (d,  $^2J_{P-C} = 7.1$  Hz), 61.6 (d,  $^2J_{P-C} = 7.2$  Hz), 50.9 (d,  $^3J_{P-C} = 2.0$  Hz), 50.0 (d,  $^1J_{P-C} = 137.9$  Hz), 37.6 (d,  $^2J_{P-C} = 12.1$  Hz), 32.6, 16.3 (d,  $^3J_{P-C} = 5.9$  Hz), 16.0 (d,  $^3J_{P-C} = 5.8$  Hz).

**<sup>31</sup>P NMR (162 MHz, CDCl<sub>3</sub>):**  $\delta$  27.46.

**HRMS (ESI-TOF, m/z):** Found: m/z 362.1875. Calcd for C<sub>20</sub>H<sub>28</sub>NO<sub>3</sub>P (M+H)<sup>+</sup> 362.1879

## 6. Supplementary Reference

- (1) Piel, I.; Pawelczyk, M. D.; Hirano, K.; Fröhlich, R.; Glorius, F. A Family of Thiazolium Salt Derived N-Heterocyclic Carbenes (NHCs) for Organocatalysis: Synthesis, Investigation and Application in Cross-Benzoin Condensation. *Eur J Org Chem.* **2011**, 2011, 5475-5484.
- (2) Kerim, M. D.; Katsina, T.; Cattoen, M.; Fincias, N.; Arseniyadis, S.; El Kaïm, L. O-Allylated Pudovik and Passerini Adducts as Versatile Scaffolds for Product Diversification. *J. Org. Chem.* **2020**, 85, 12514-12525.
- (3) Firouzabadi, H.; Iranpoor, N.; Sobhani, S. PPh<sub>3</sub>/DDQ as a neutral system for the facile preparation of diethyl  $\alpha$ -bromo,  $\alpha$ -iodo and  $\alpha$ -azidophosphonates from diethyl  $\alpha$ -hydroxyphosphonates. *Tetrahedron* **2004**, 60, 203-210.
- (4) Yang, Q.; Li, C.; Cheng, M.-X.; Yang, S.-D. Palladium-Catalyzed Migratory Insertion of Isocyanides for Synthesis of C-Phosphonoketenimines. *ACS Catal.* **2016**, 6, 4715-4719.
- (5) Gajda, T. PREPARATION OF DIETHYL 1-BROMOALKYLPHOSPHONATES. *PHOSPHORUS SULFUR* **1990**, 53, 327-331.
- (6) Chen, C.; Song, J.-H.; Ding, L.-Y.; Zhang, X.-X.; Wang, K.; Ni, C.; Hu, J.; Zhu, B. Modular Synthesis of Polysubstituted  $\alpha$ -Phosphorylated Arenes via the Catellani Strategy. *Org. Lett.* **2024**, 26, 5770-5775.
- (7) Liao, T.; Zhao, X.; Yang, F.; Xu, G.; Chen, D.; Tu, T.; Huang, S.; Ren, S.-C.; Chi, Y. R. Carbene-Catalyzed Nitrogen to Carbon Aryl Migration via a Radical-Neutral Crossover Process. *ACS Catal.* **2025**, 15, 16356-16368.
- (8) Chen, D.; Xu, L.; Yu, Y.; Mo, Q.; Qi, X.; Liu, C. Triflylpyridinium Enables Rapid and Scalable Controlled Reduction of Carboxylic Acids to Aldehydes using Pinacolborane. *Angew. Chem. Int. Ed.* **2023**, 62, e202215168.
- (9) Fu, J.-P.; He, Y.-H.; Zhong, J.; Yang, Y.; Deng, X.; Guan, Z. An efficient and general route to the synthesis of diethyl  $\alpha,\alpha$ -bromofluorophosphonates. *J. Fluor. Chem.* **2011**, 132, 636-640.
- (10) C. P. P.; Joseph, E.; A, A.; D. S, N.; Ibnusaud, I.; Raskatov, J.; Singaram, B. Stabilization of NaBH<sub>4</sub> in Methanol Using a Catalytic Amount of NaOMe. Reduction of Esters and Lactones at Room Temperature without Solvent-Induced Loss of Hydride. *J. Org. Chem.* **2018**, 83, 1431-1440.
- (11) Hawkins, M. J.; Powell, E. T.; Leo, G. C.; Gauthier, D. A.; Greco, M. N.; Maryanoff, B. Facile Dephosphonylation of  $\beta$ -Ketophosphonic Acids: Mechanistic Studies. *Org. Lett.* **2006**, 8, 3429-3431.
- (12) Genz, M.; Melse, O.; Schmidt, S.; Vickers, C.; Dörr, M.; van den Bergh, T.; Joosten, H.-J.; Bornscheuer, U. T. Engineering the Amine Transaminase from *Vibrio fluvialis* towards Branched-Chain Substrates. *ChemCatChem.* **2016**, 8, 3199-3202.
- (13) Zou, H.; Wang, Y.; Pu, H.; Fu, H.; Cheng, Z.; Tian, F.; Gu, L.; Xue, W. Discovery of Novel Indole Derivatives Containing Imidazolidinone as Potential Antifungal Agents with Mechanistic Studies. *J. Agric. Food Chem.* **2025**, 73, 27363-27371.
- (14) Iorga, B.; Eymery, F.; Savignac, P. Controlled monohalogenation of phosphonates: A new route to pure  $\alpha$ -monohalogenated diethyl benzylphosphonates. *Tetrahedron* **1999**, 55, 2671-2686.
- (15) Iorga, B.; Eymery, F.; Savignac, P. Controlled monohalogenation of phosphonates: A new route to pure  $\alpha$ -monohalogenated diethyl benzylphosphonates. *Tetrahedron* **1999**, 55, 2671-2686.
- (16) Fu, J.-P.; He, Y.-H.; Zhong, J.; Yang, Y.; Deng, X.; Guan, Z. An efficient and general route to the synthesis of diethyl  $\alpha,\alpha$ -bromofluorophosphonates. *J. Fluor. Chem.* **2011**, 132, 636-640.
- (17) Zou, L.; Yang, H.; Xie, T.; Wang, L.-W.; Ye, Y. Nickel-Catalyzed Cross-Electrophile Vinylation of

- $\alpha$ -Chloro Phosphonates. *J. Org. Chem.* **2024**, *89*, 15822-15833.
- (18) Shi, A.; Sun, K.; Chen, X.; Qu, L.; Zhao, Y.; Yu, B. Perovskite as Recyclable Photocatalyst for Annulation Reaction of N-Sulfonyl Ketimines. *Org. Lett.* **2021**, *24*, 299-303.

## 7. Supplementary Figures

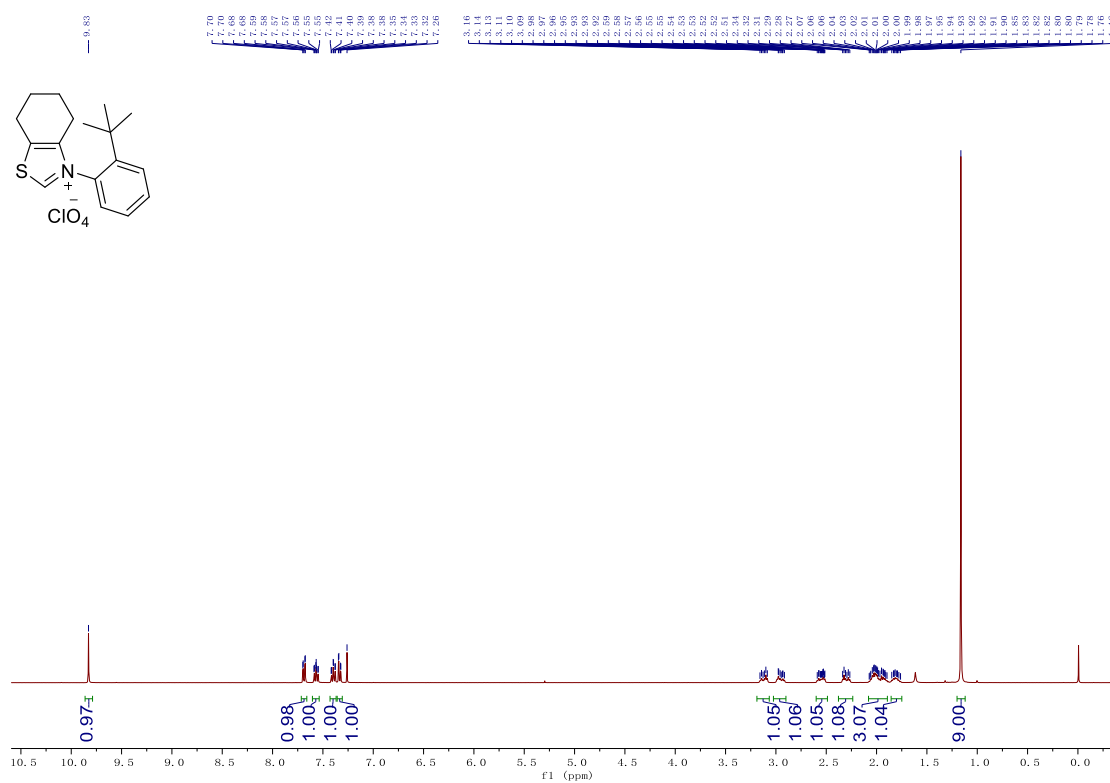

Figure S1.  $^1\text{H}$  NMR (400 MHz,  $\text{CDCl}_3$ ) spectrum of N1

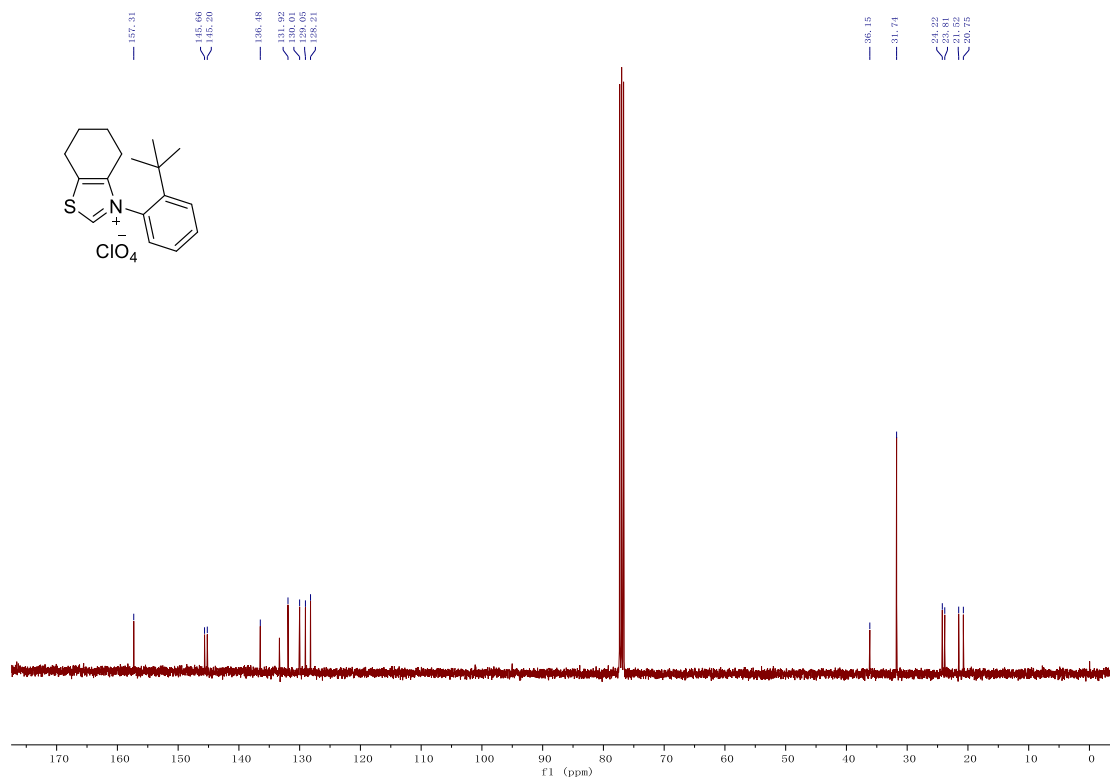

Figure S2.  $^{13}\text{C}$  NMR (101 MHz,  $\text{CDCl}_3$ ) spectrum of N1

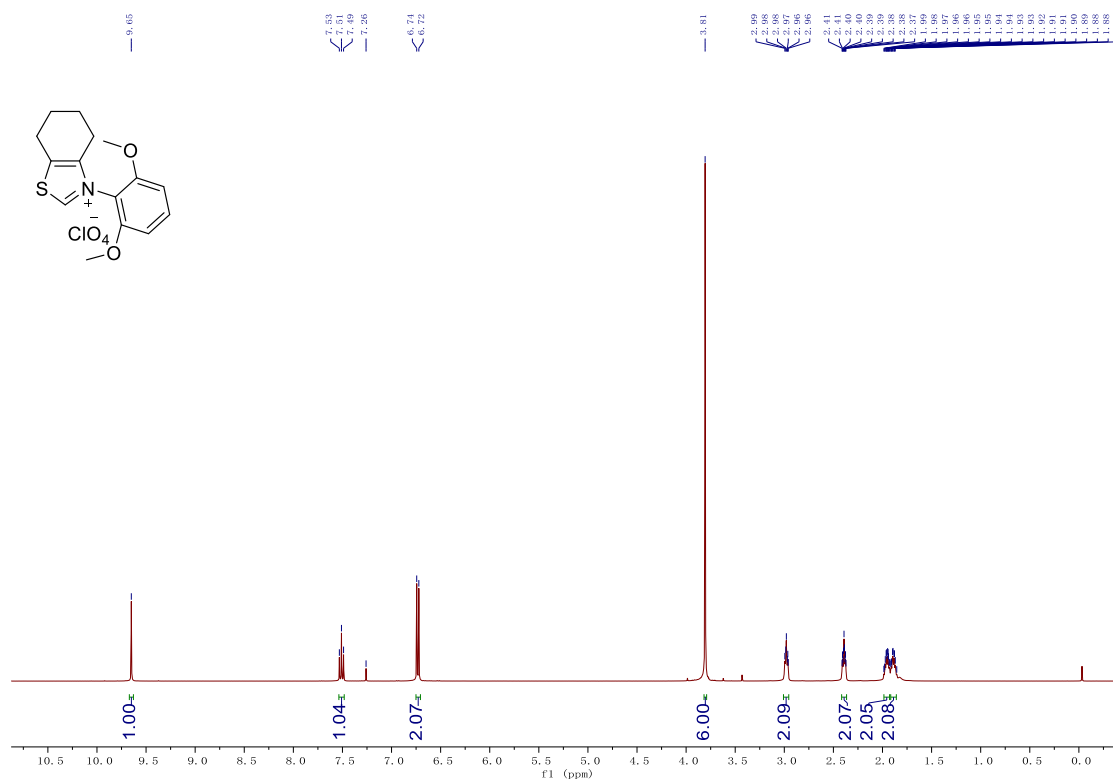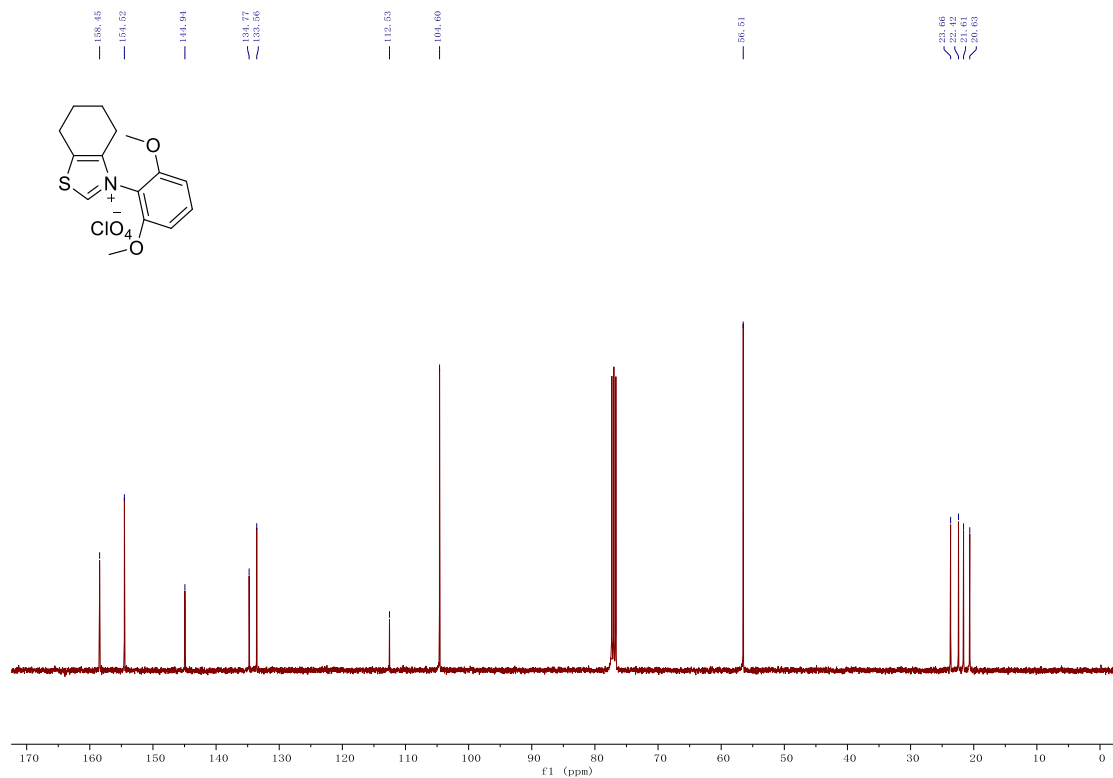

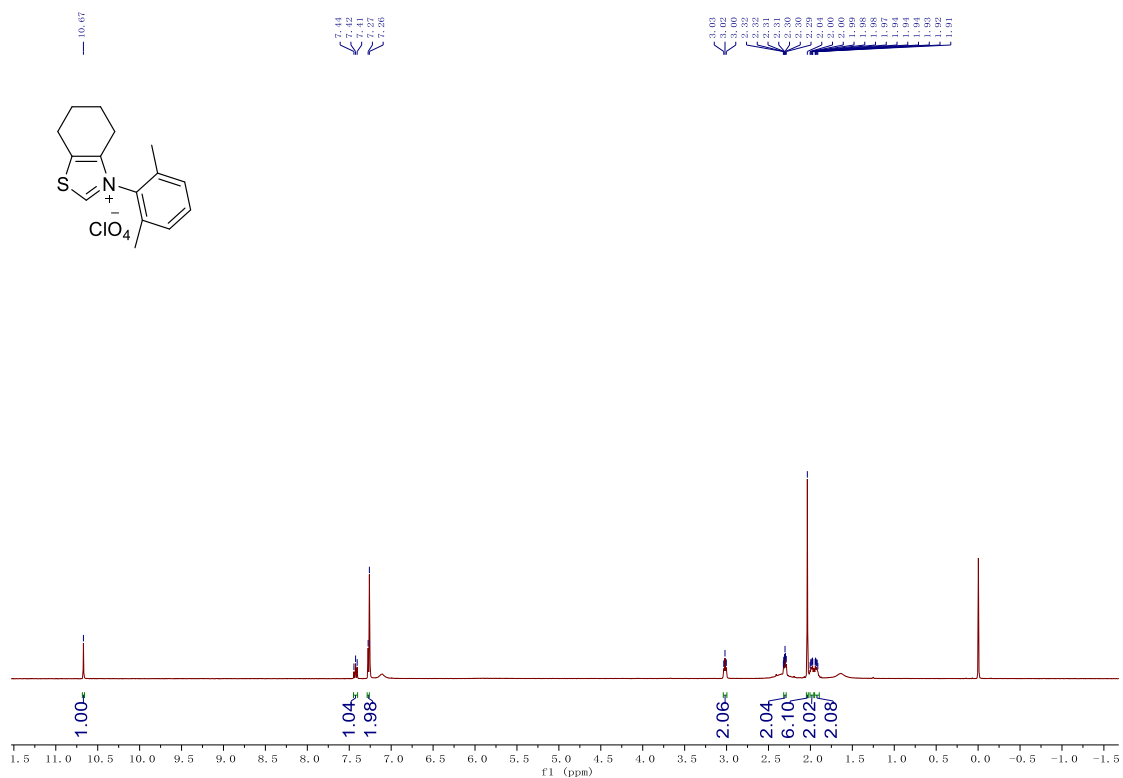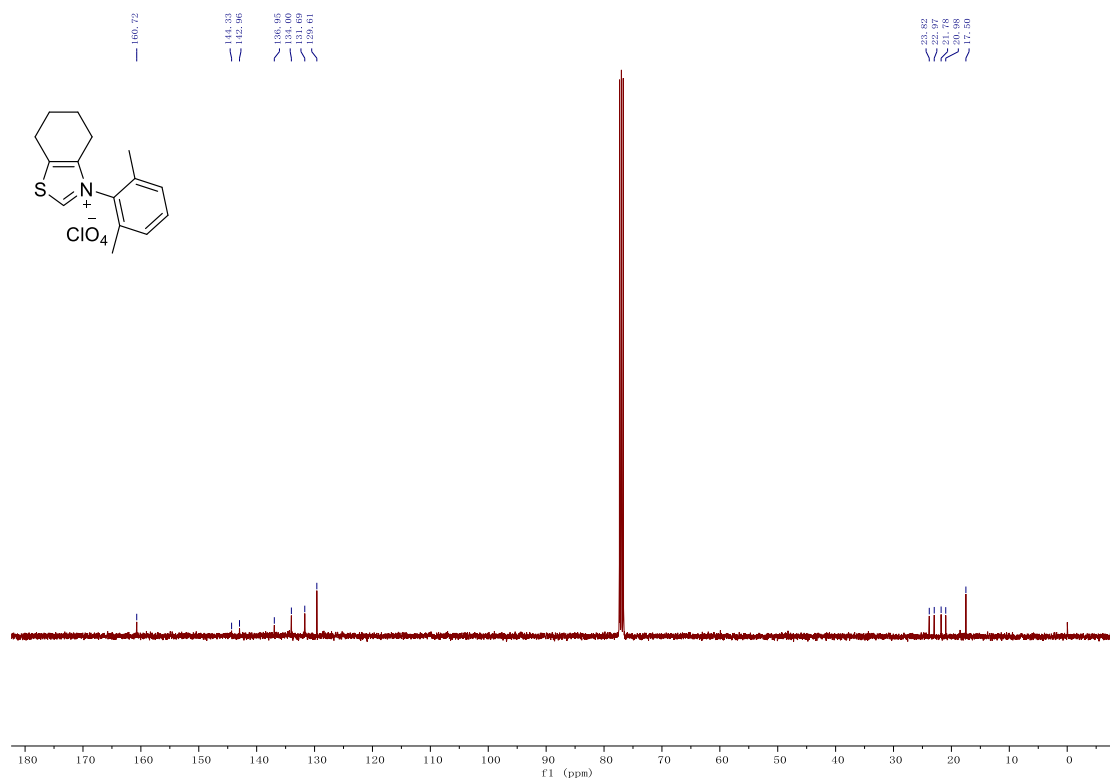

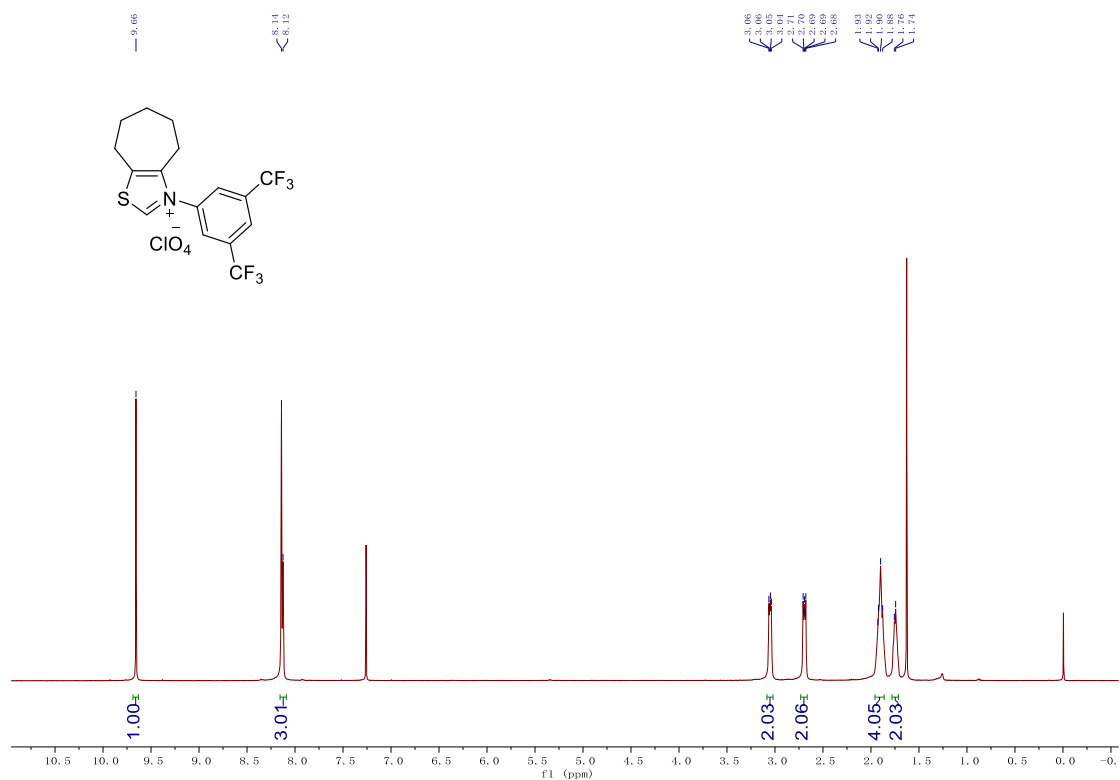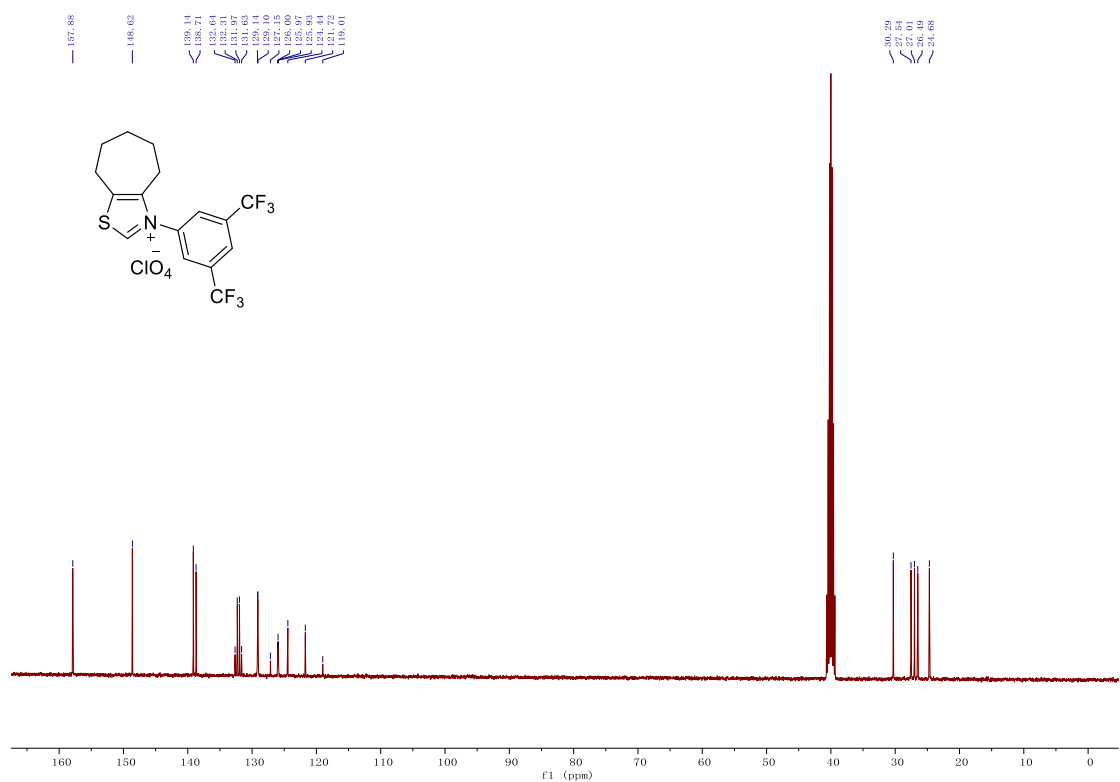

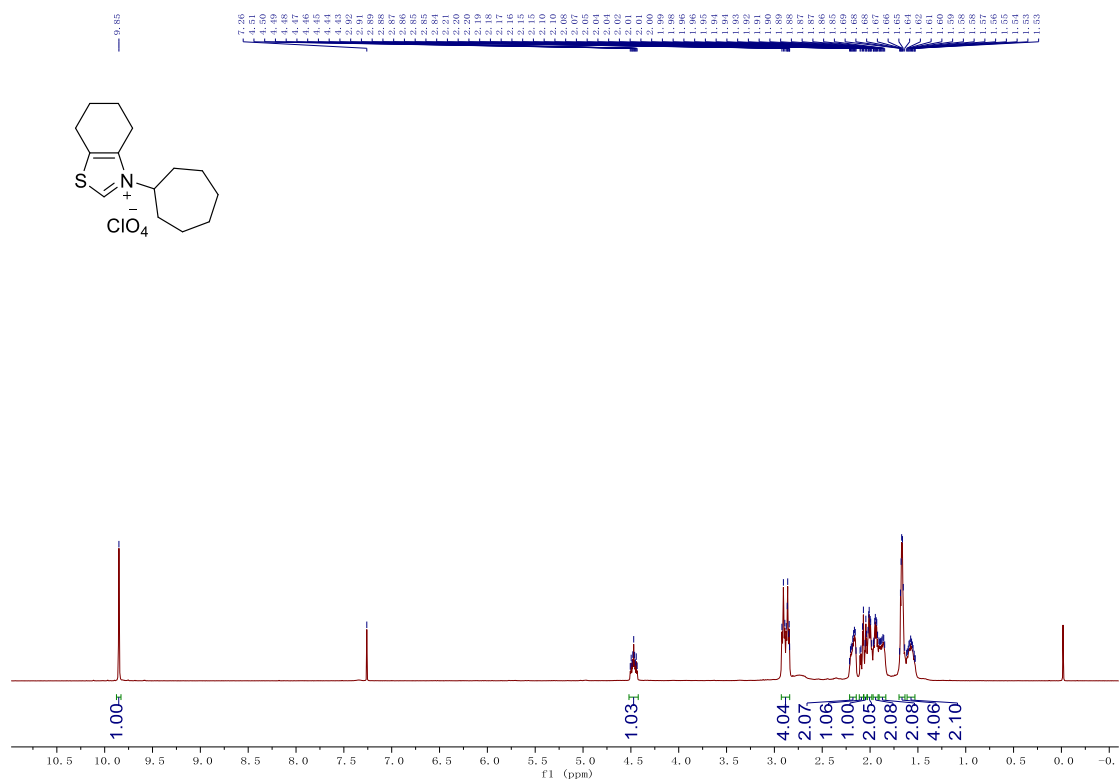

Figure S9. <sup>1</sup>H NMR (400 MHz, CDCl<sub>3</sub>) spectrum of N5

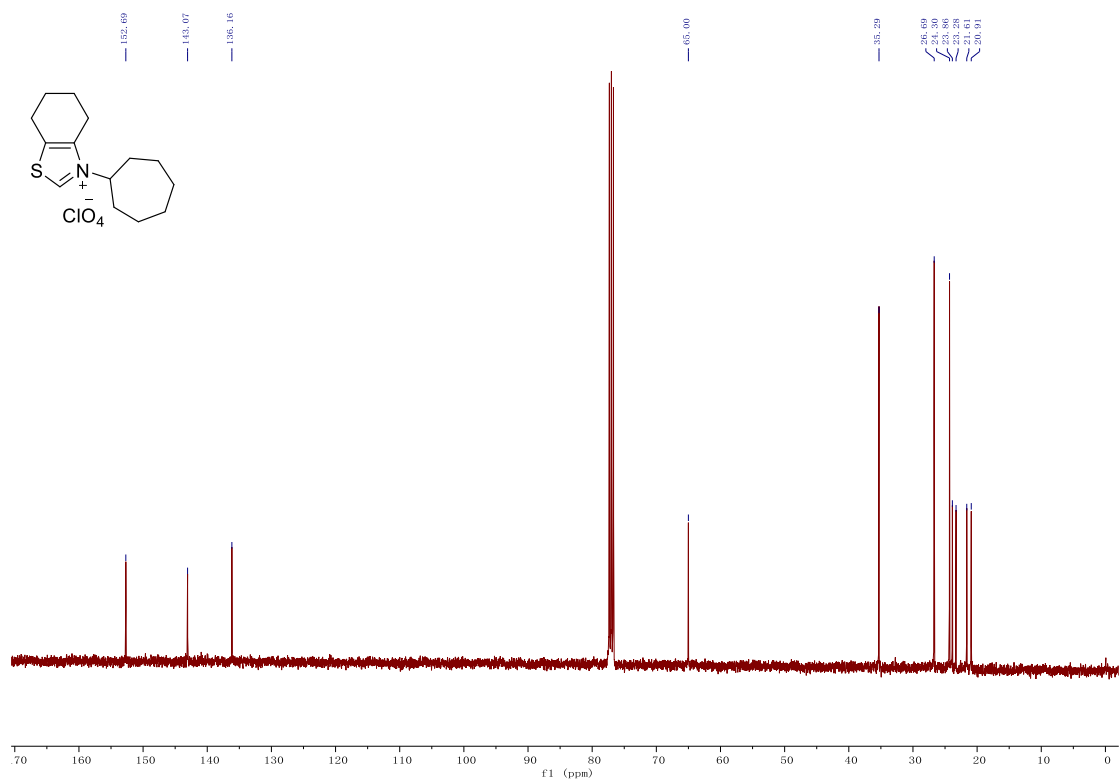

Figure S10. <sup>13</sup>C NMR (101 MHz, CDCl<sub>3</sub>) spectrum of N5

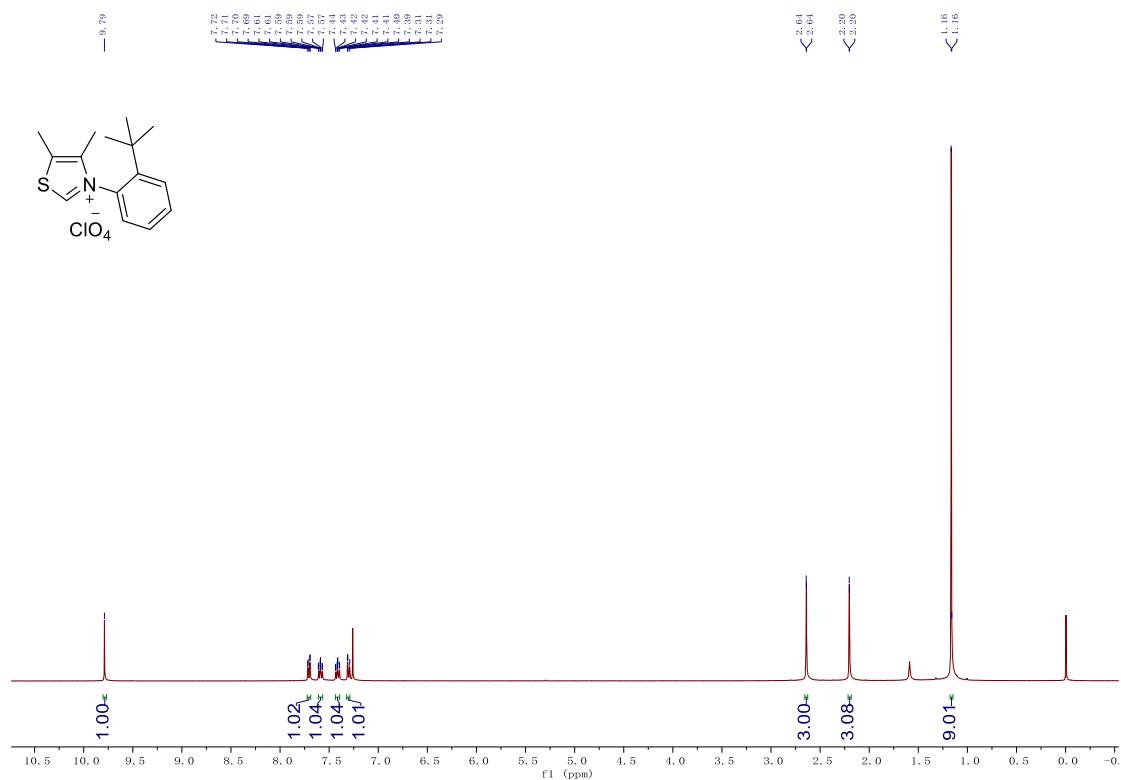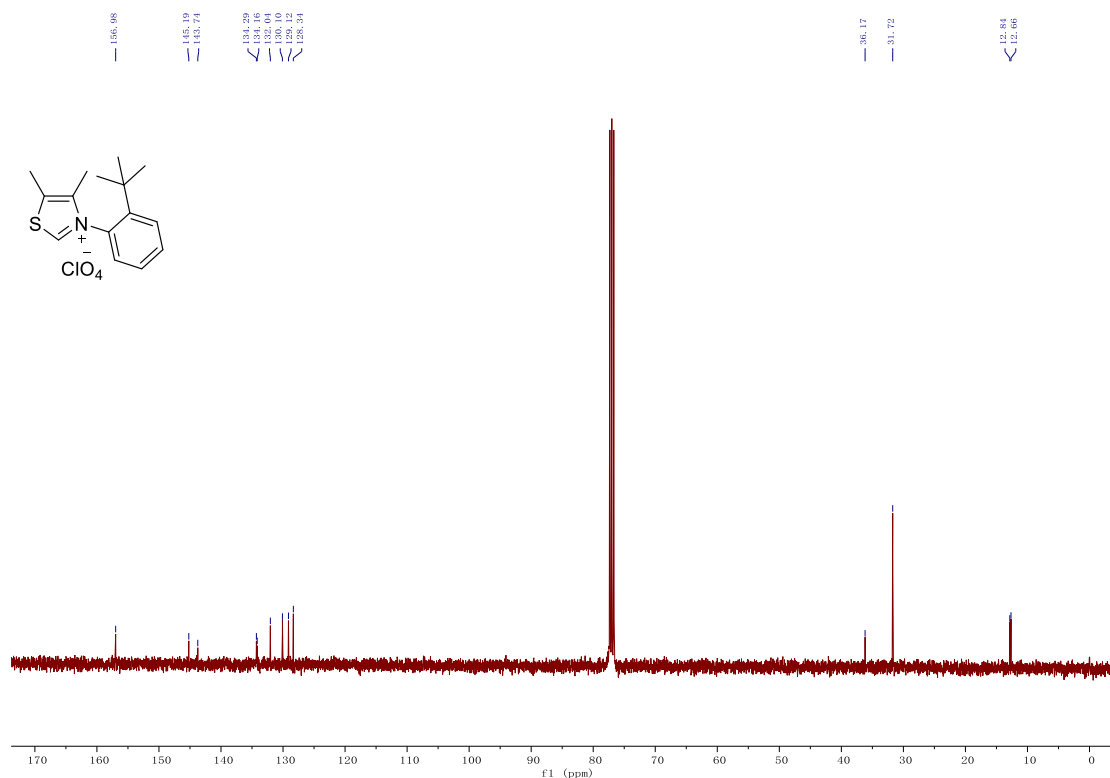

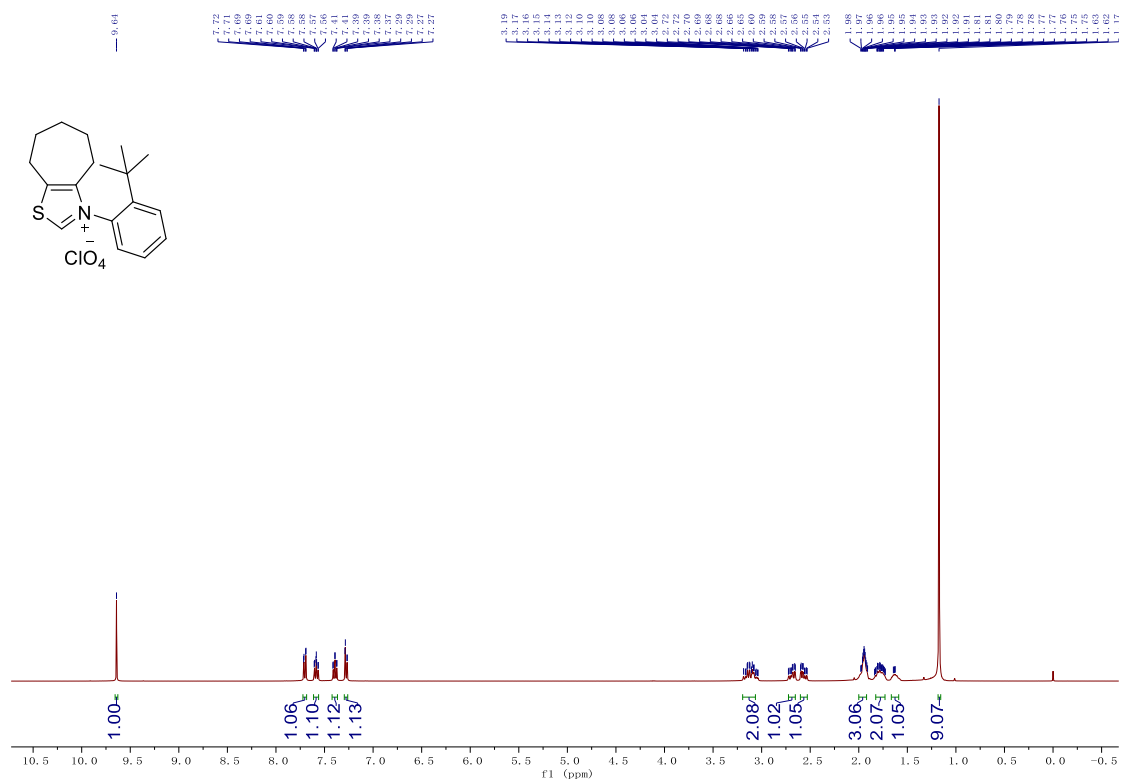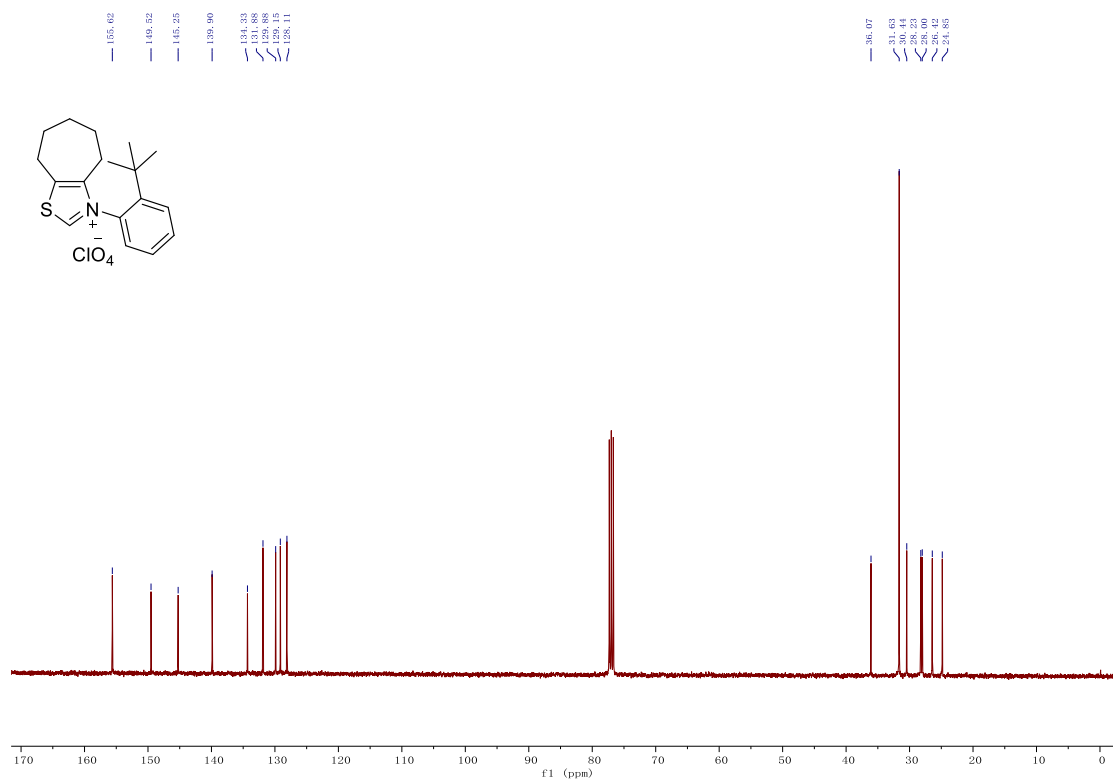



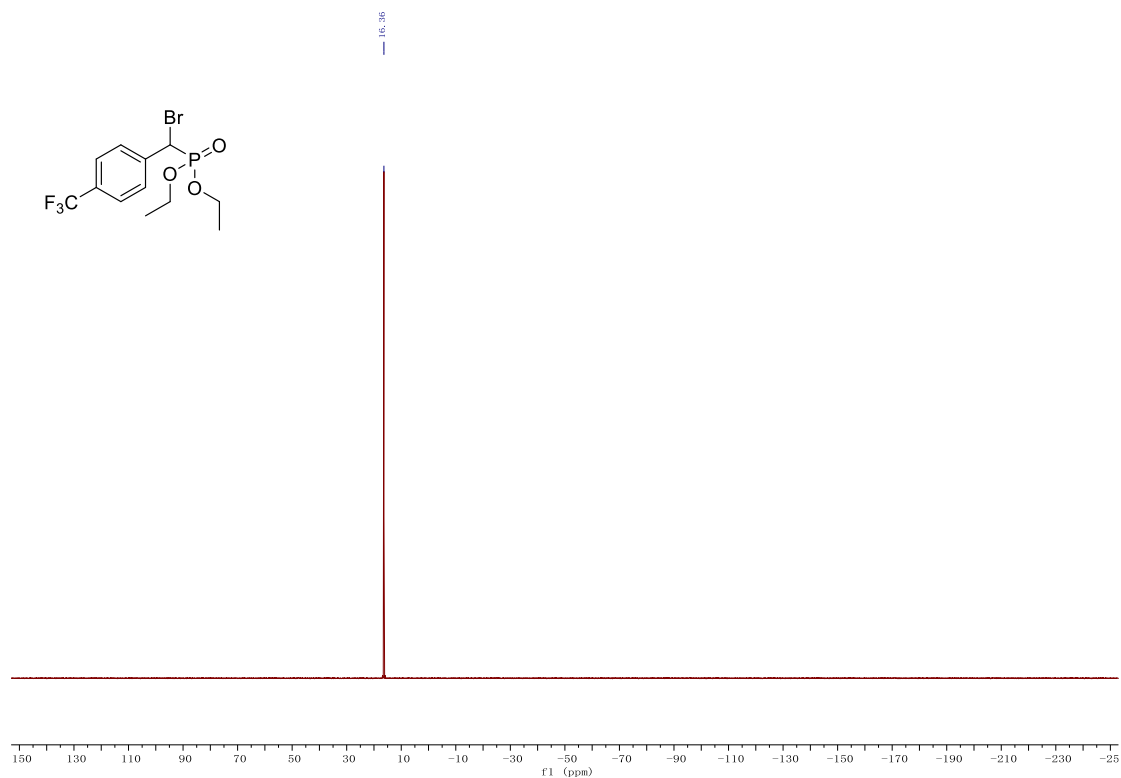

Figure S17.  $^{31}\text{P}$  NMR (162 MHz,  $\text{CDCl}_3$ ) spectrum of **1e**

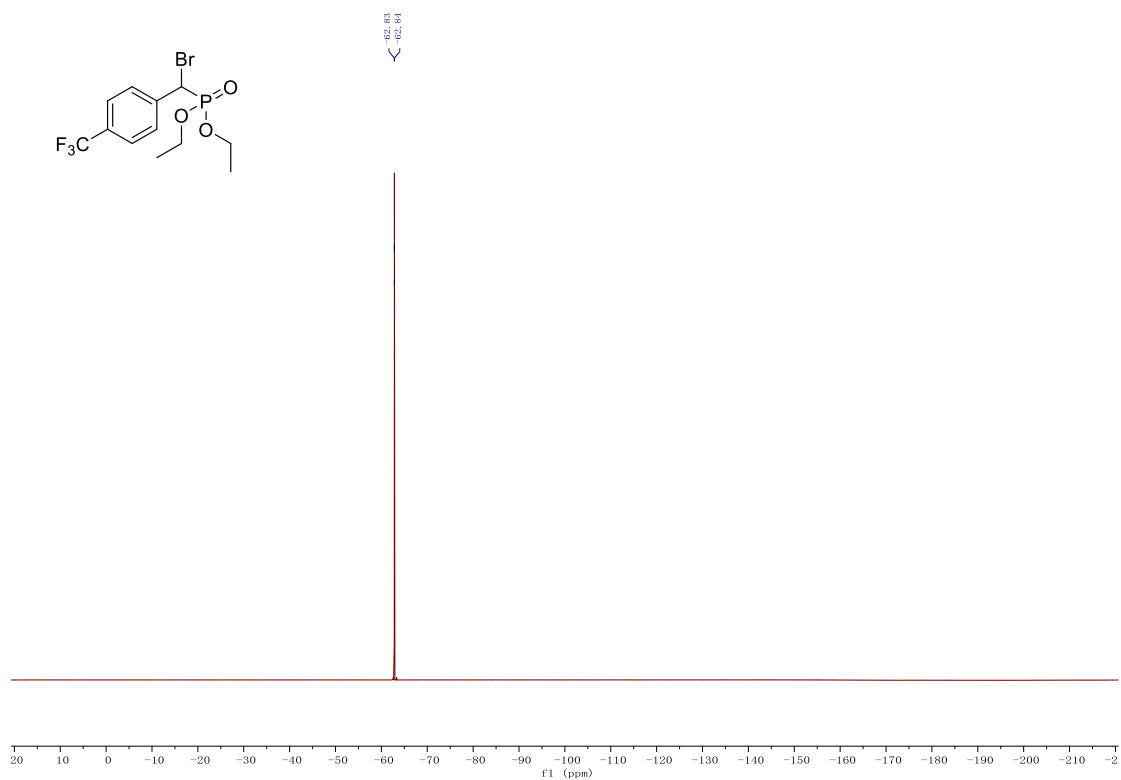

Figure S18.  $^{19}\text{F}$  NMR (377 MHz,  $\text{CDCl}_3$ ) spectrum of **1e**

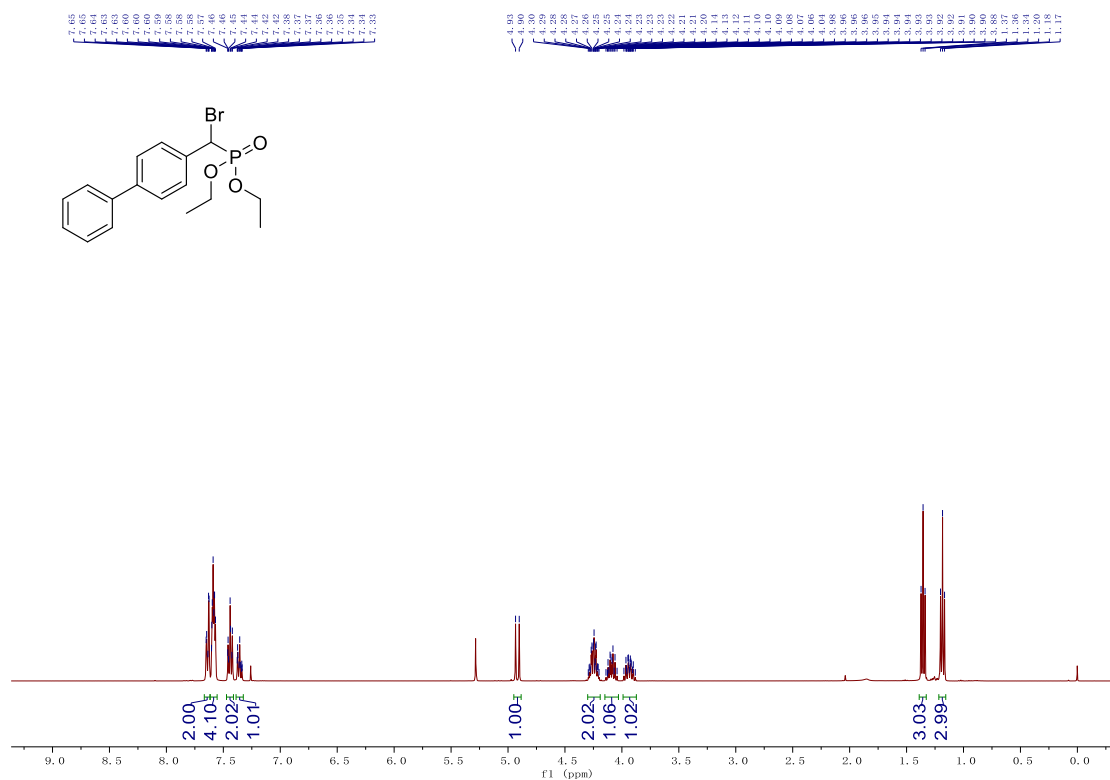

Figure S19. <sup>1</sup>H NMR (400 MHz, CDCl<sub>3</sub>) spectrum of 1f

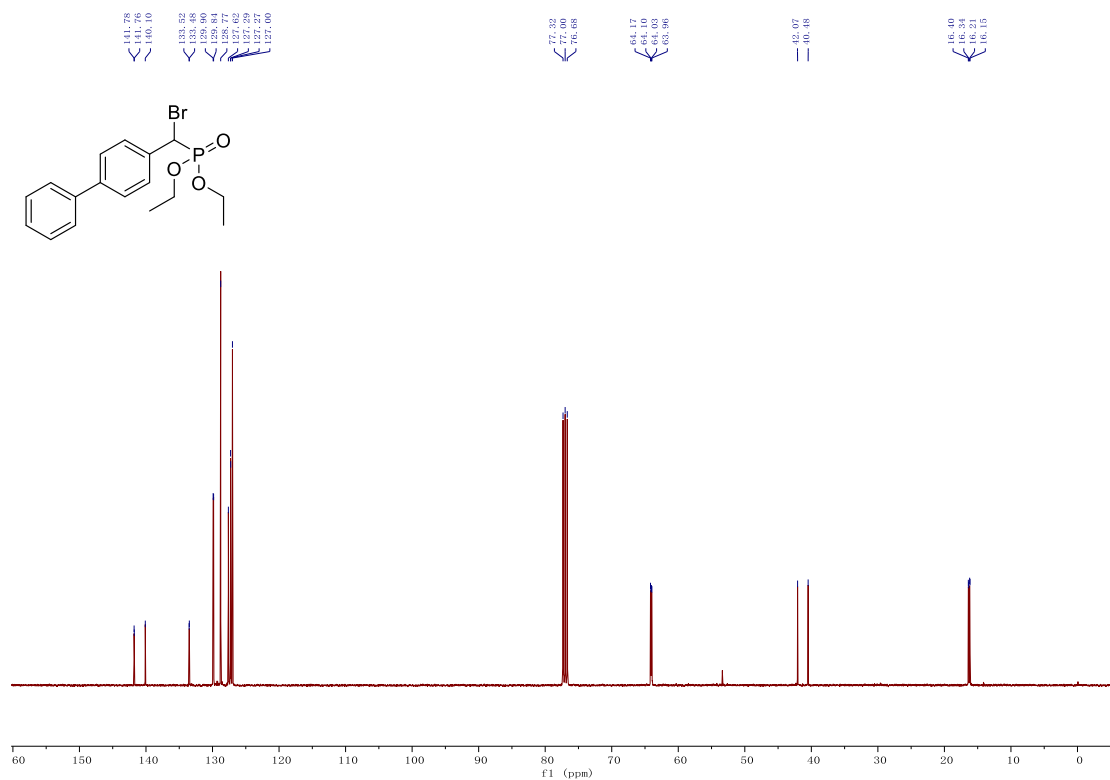

Figure S20. <sup>13</sup>C NMR (101 MHz, CDCl<sub>3</sub>) spectrum of 1f

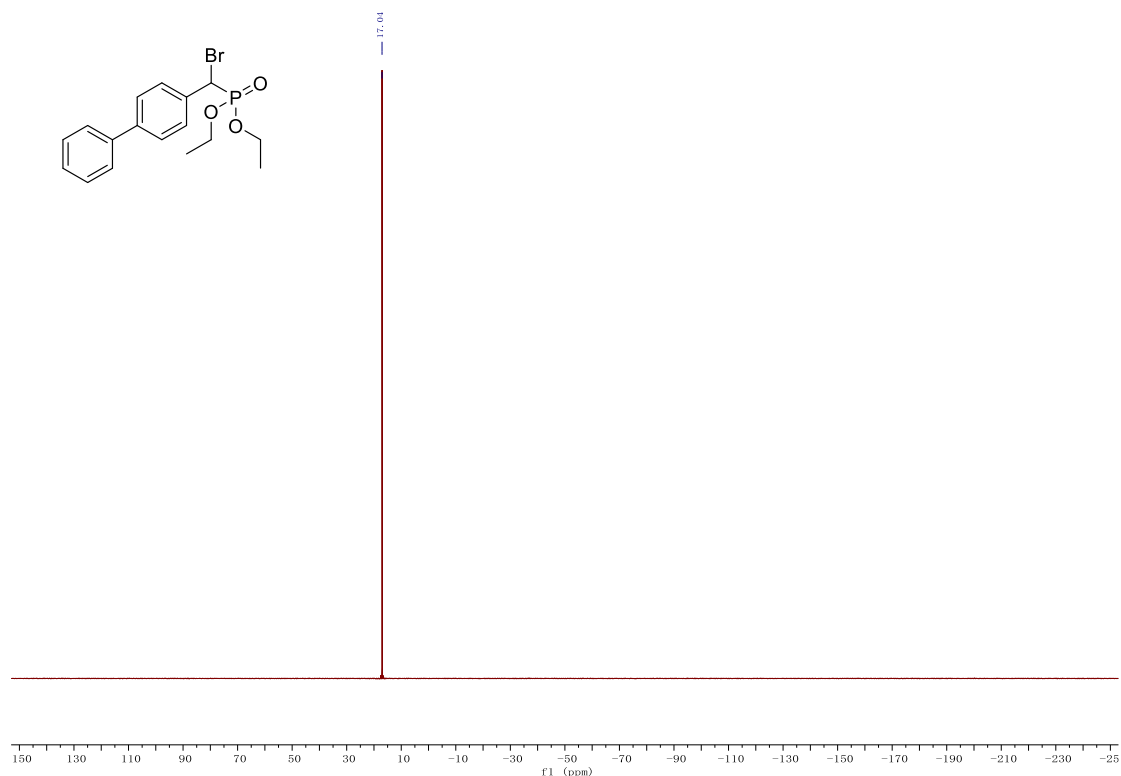

Figure S21. <sup>31</sup>P NMR (162 MHz, CDCl<sub>3</sub>) spectrum of **1f**

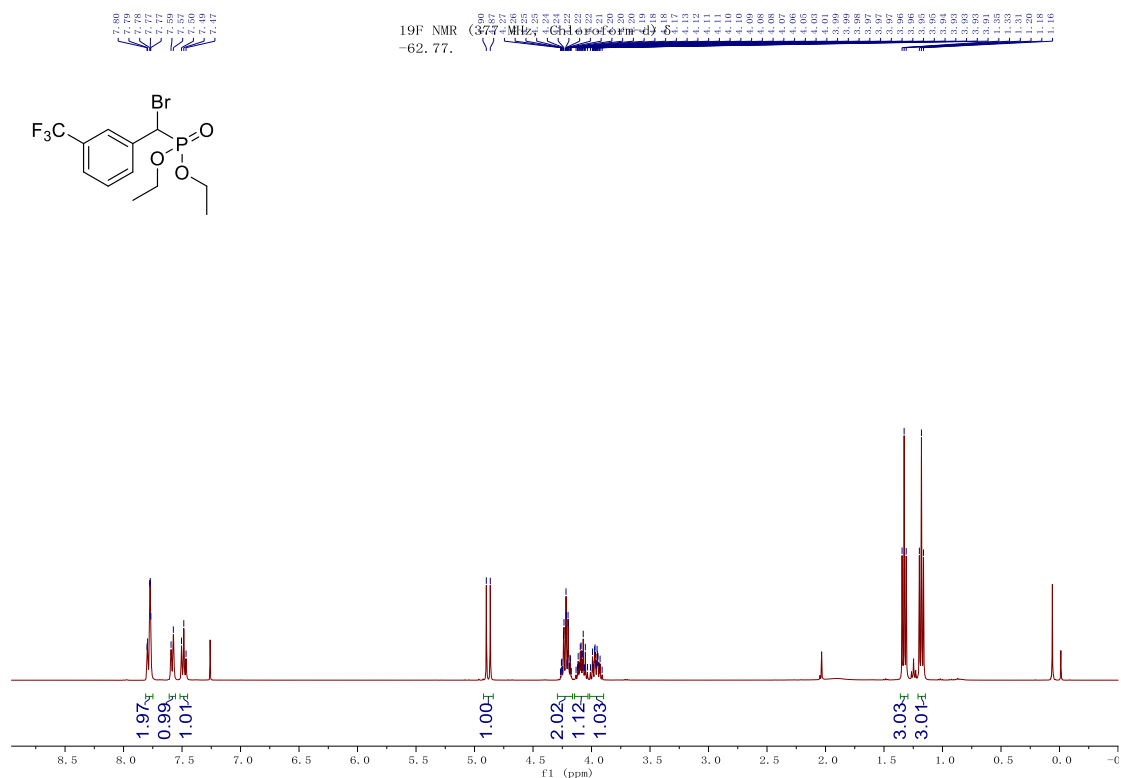

Figure S22. <sup>1</sup>H NMR (400 MHz, CDCl<sub>3</sub>) spectrum of **1i**

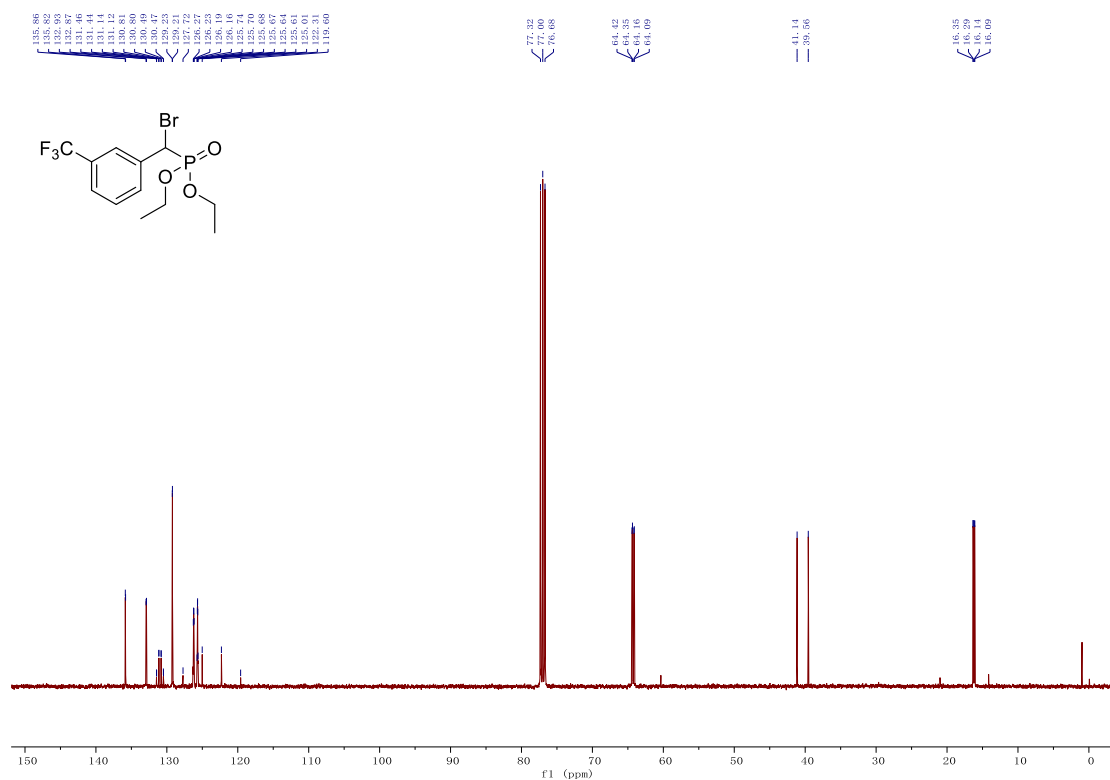

Figure S23.  $^{13}\text{C}$  NMR (101 MHz,  $\text{CDCl}_3$ ) spectrum of **1i**

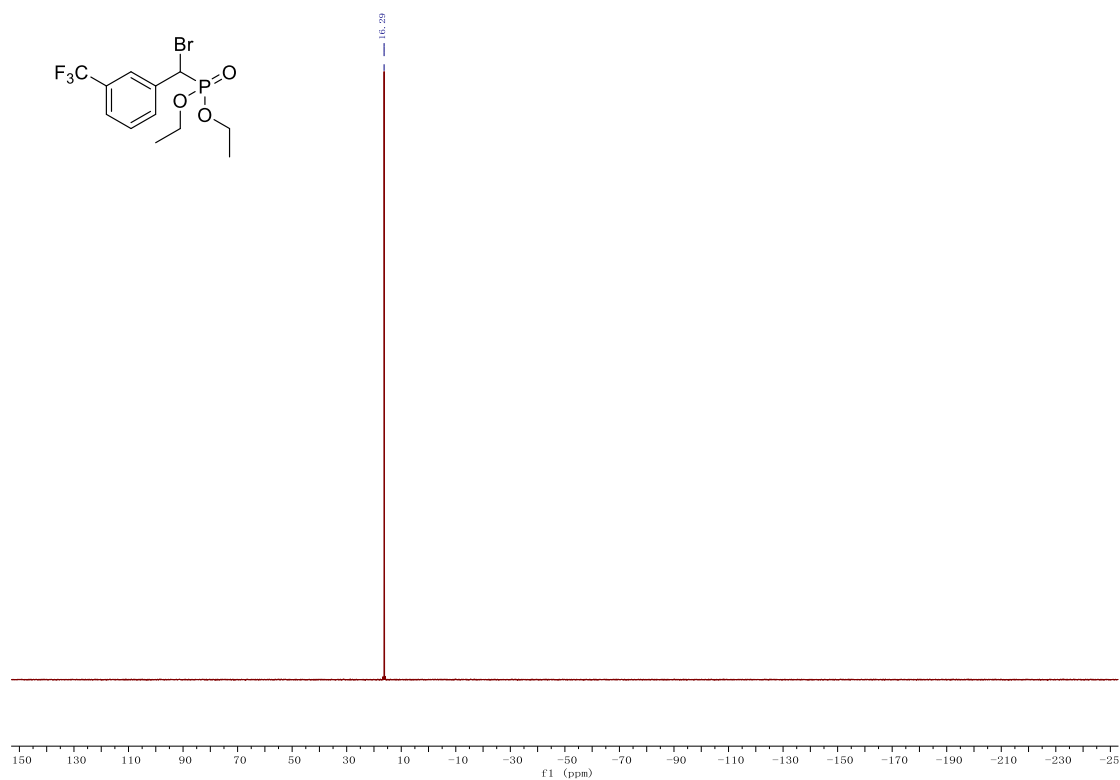

Figure S24.  $^{31}\text{P}$  NMR (162 MHz,  $\text{CDCl}_3$ ) spectrum of **1i**

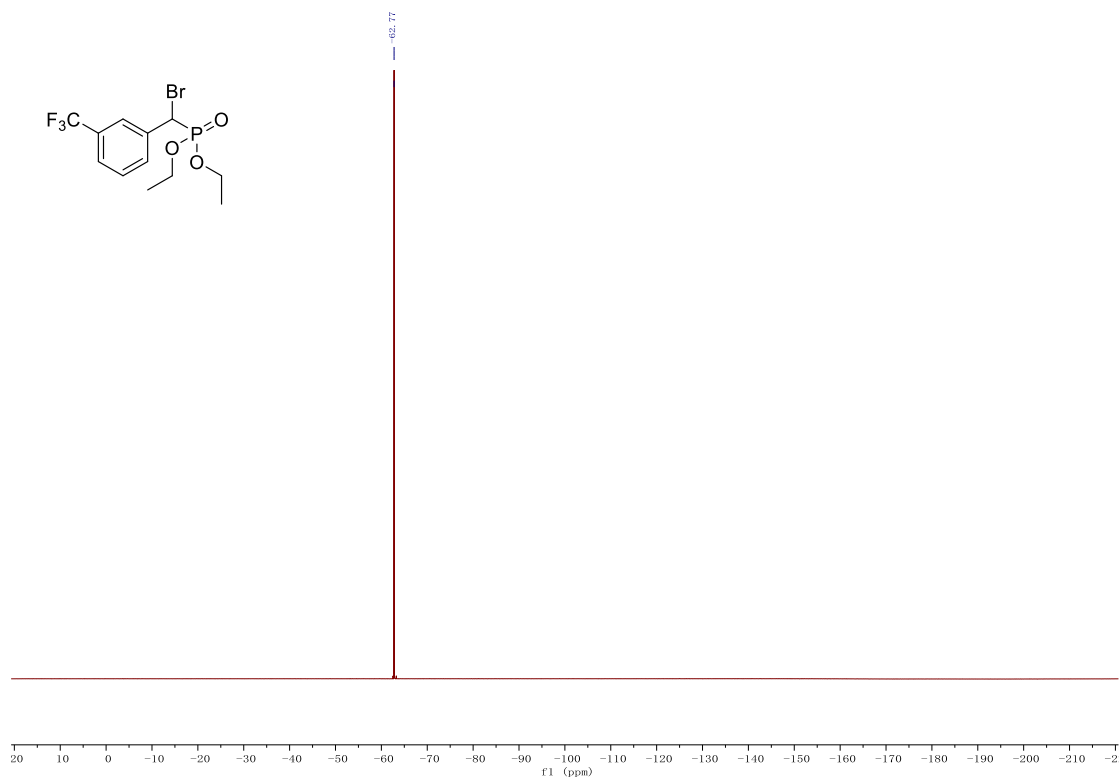

Figure S25.  $^{19}\text{F}$  NMR (377 MHz,  $\text{CDCl}_3$ ) spectrum of **1i**

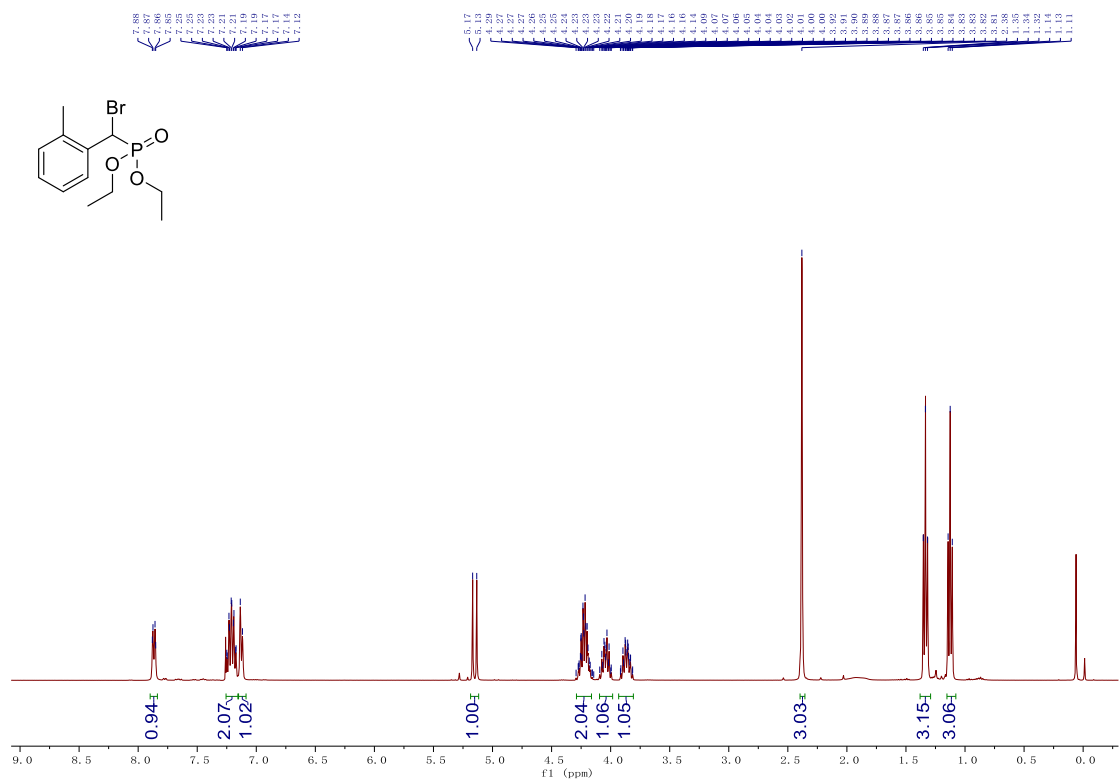

Figure S26.  $^1\text{H}$  NMR (400 MHz,  $\text{CDCl}_3$ ) spectrum of **1j**

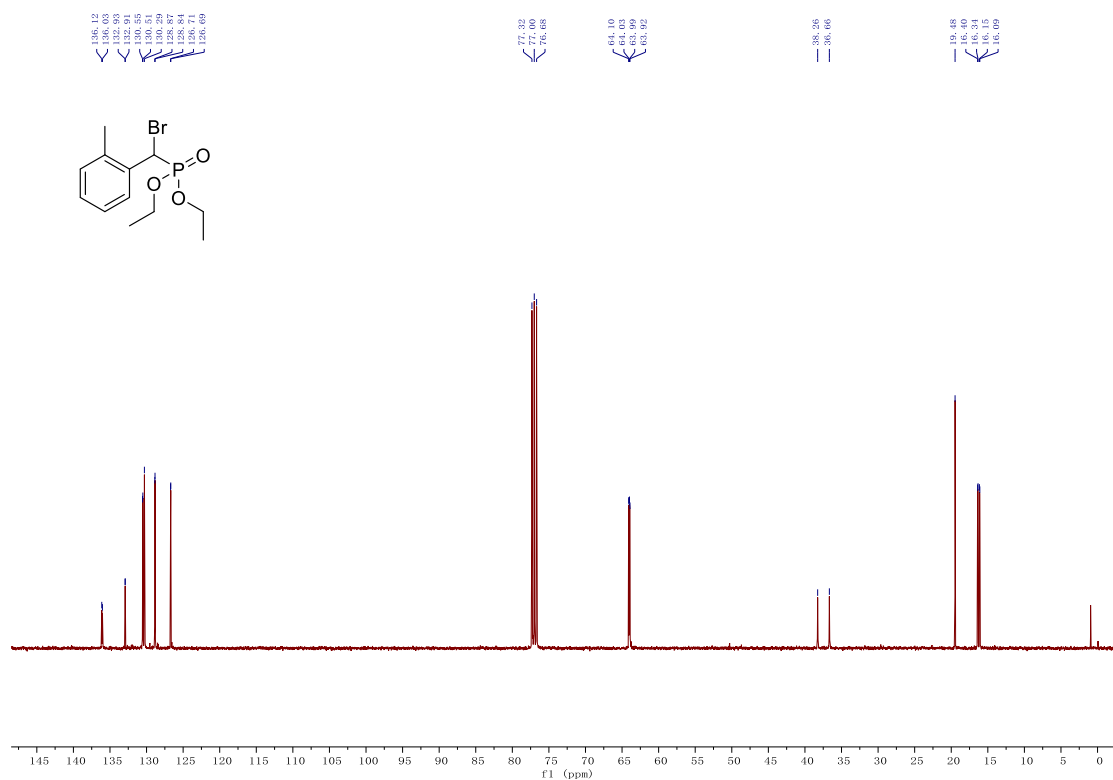

Figure S27. <sup>13</sup>C NMR (101 MHz, CDCl<sub>3</sub>) spectrum of **1j**

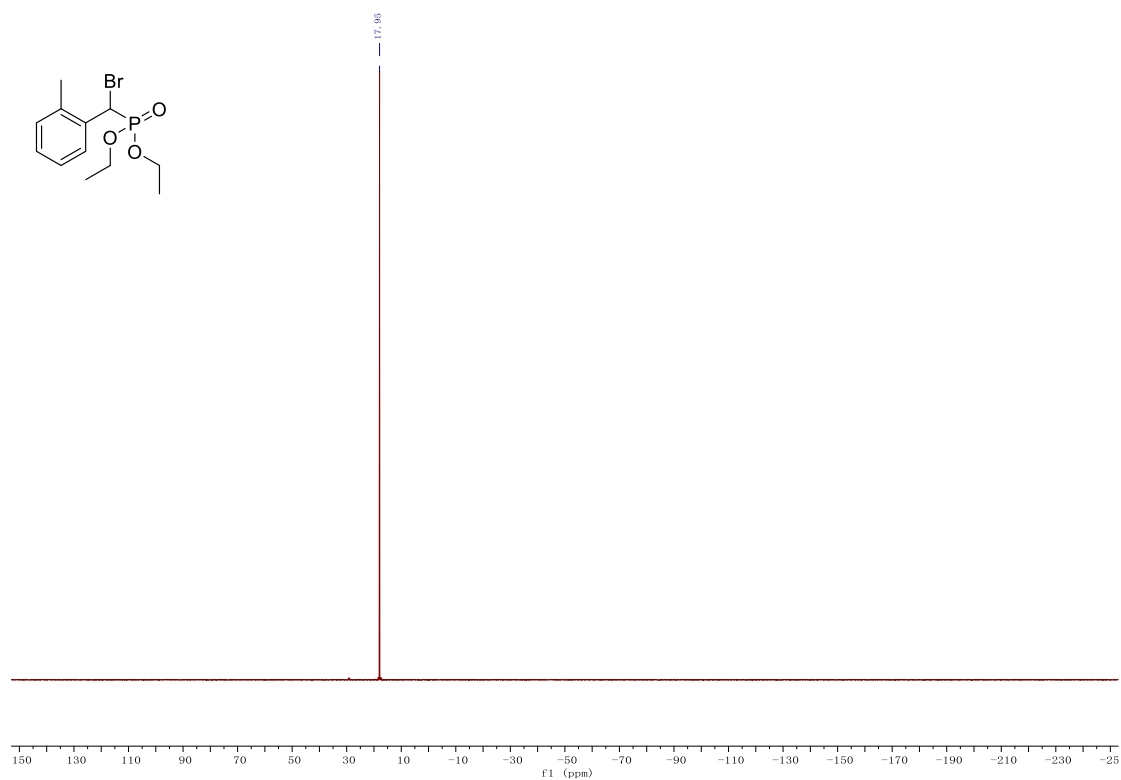

Figure S28. <sup>31</sup>P NMR (162 MHz, CDCl<sub>3</sub>).spectrum of **1j**

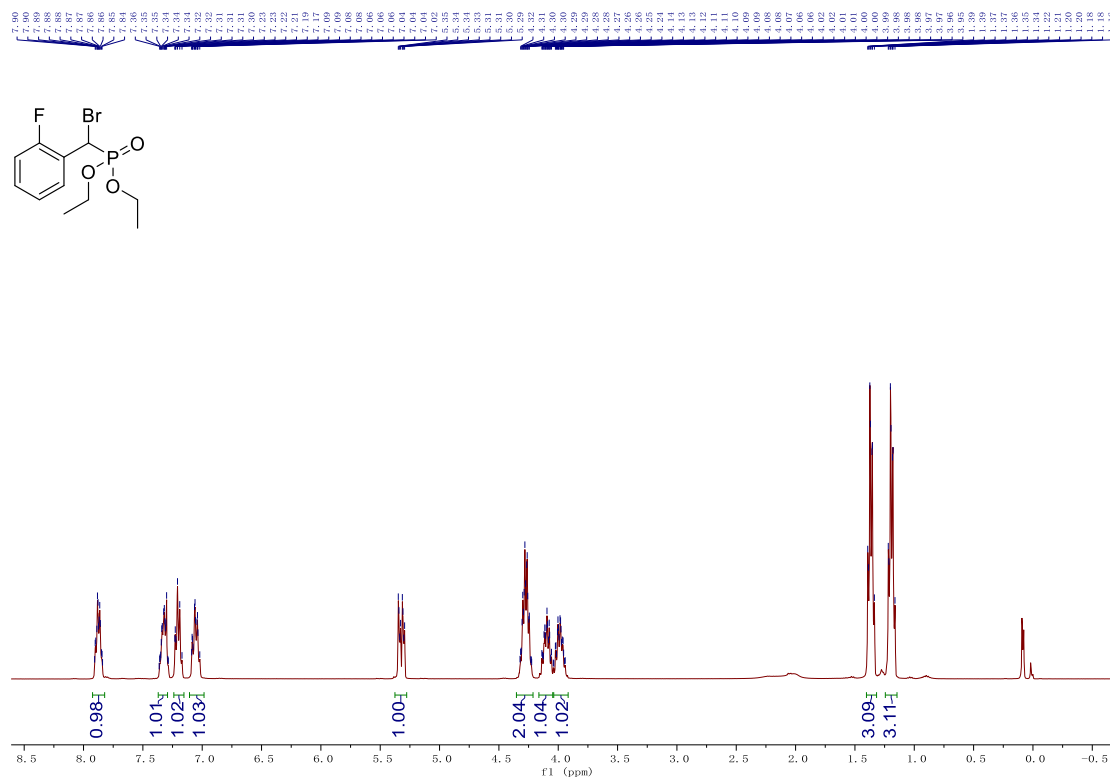

Figure S29. <sup>1</sup>H NMR (400 MHz, CDCl<sub>3</sub>) spectrum of 1k

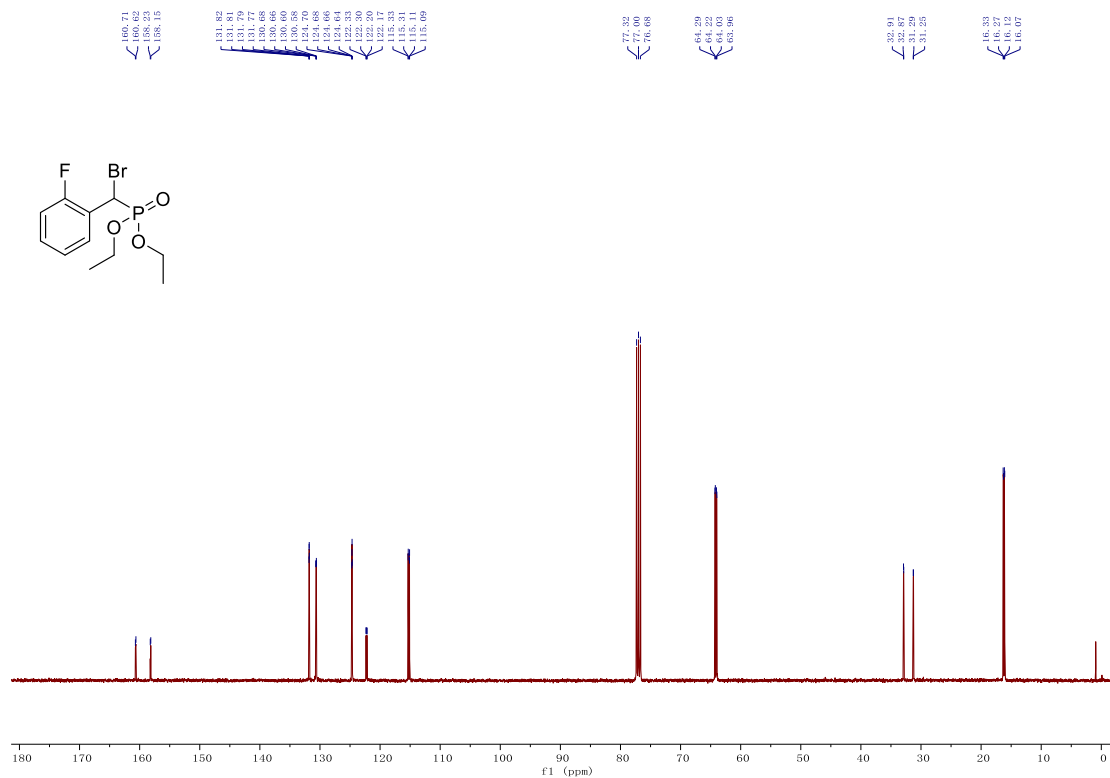

Figure S30. <sup>13</sup>C NMR (101 MHz, CDCl<sub>3</sub>) spectrum of 1k

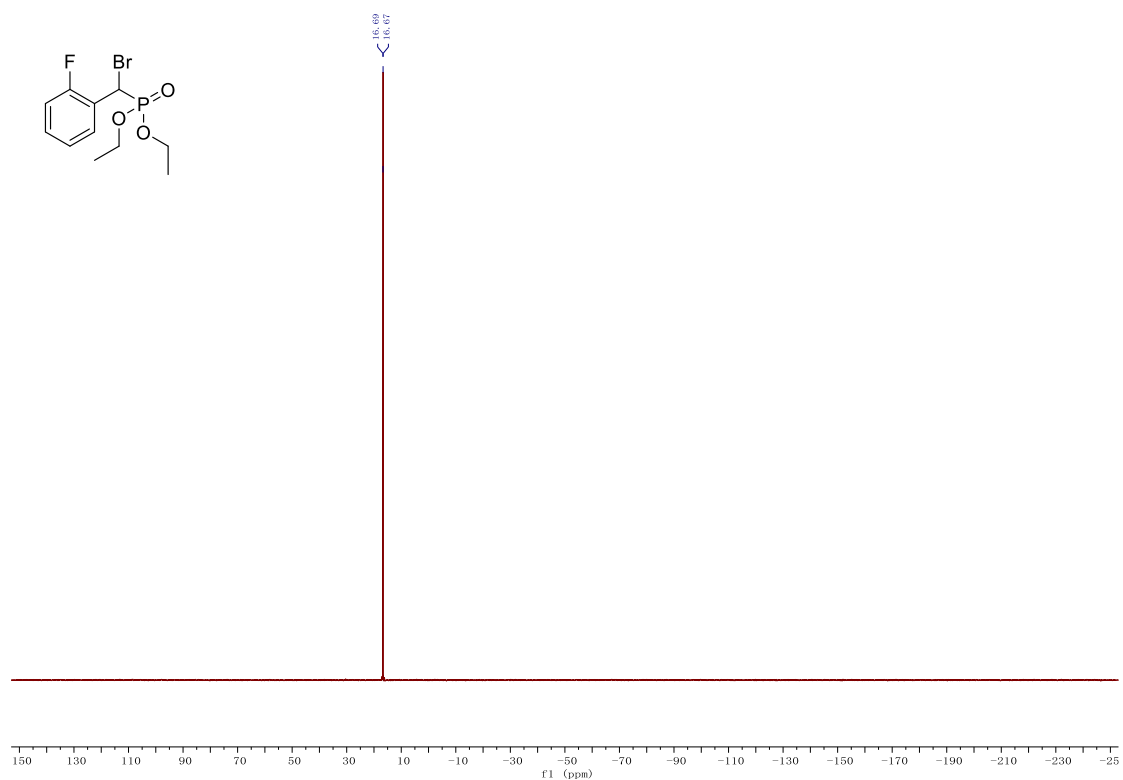

**Figure S31.**  $^{31}\text{P}$  NMR (162 MHz,  $\text{CDCl}_3$ ).spectrum of **1k**

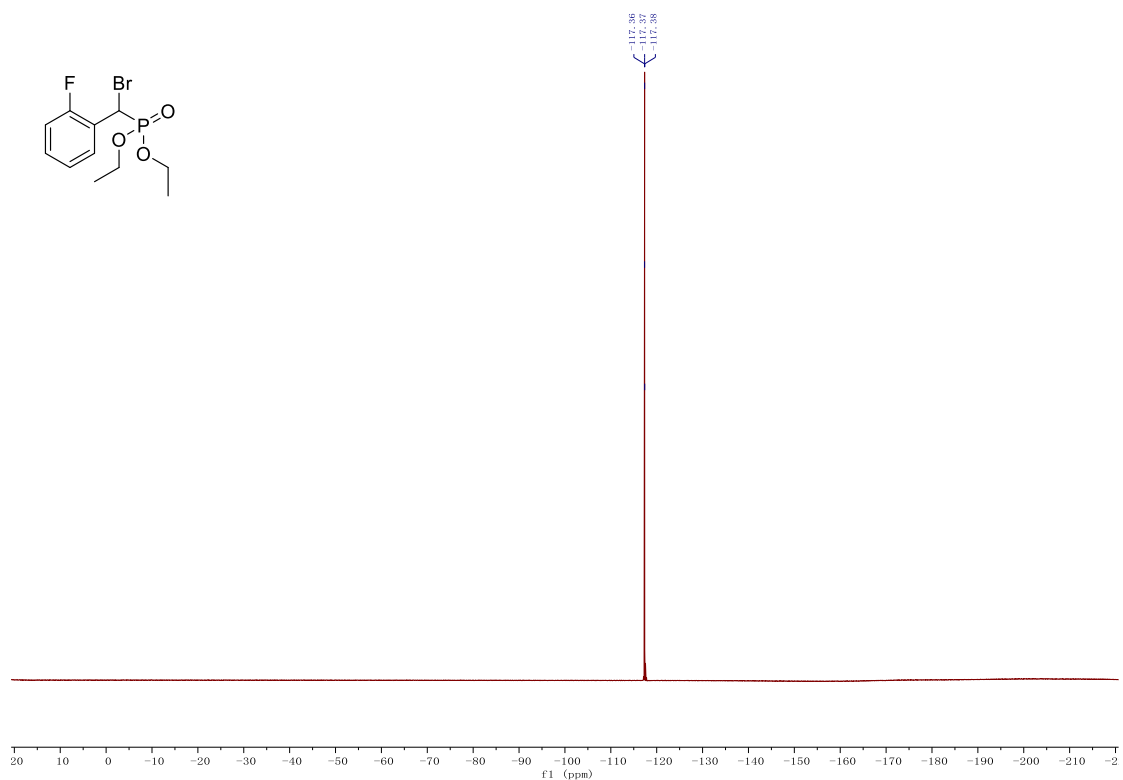

**Figure S32.**  $^{19}\text{F}$  NMR (377 MHz,  $\text{CDCl}_3$ ) spectrum of **1k**

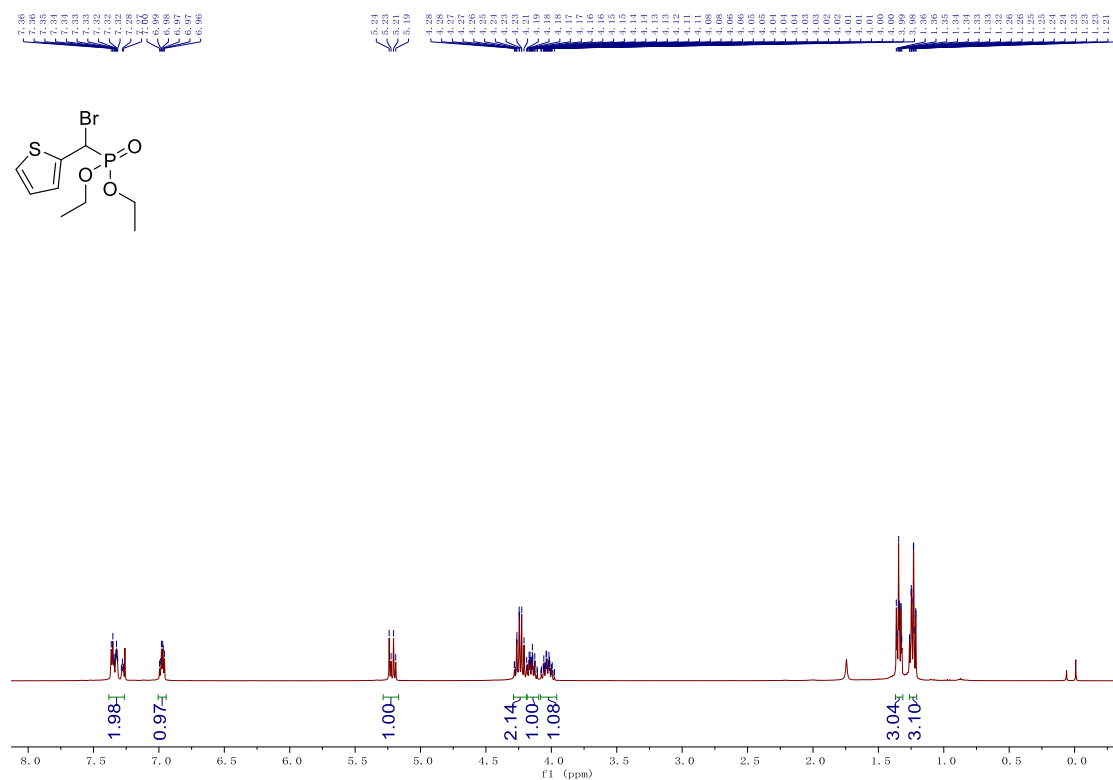

Figure S33. <sup>1</sup>H NMR (400 MHz, CDCl<sub>3</sub>) spectrum of 1m

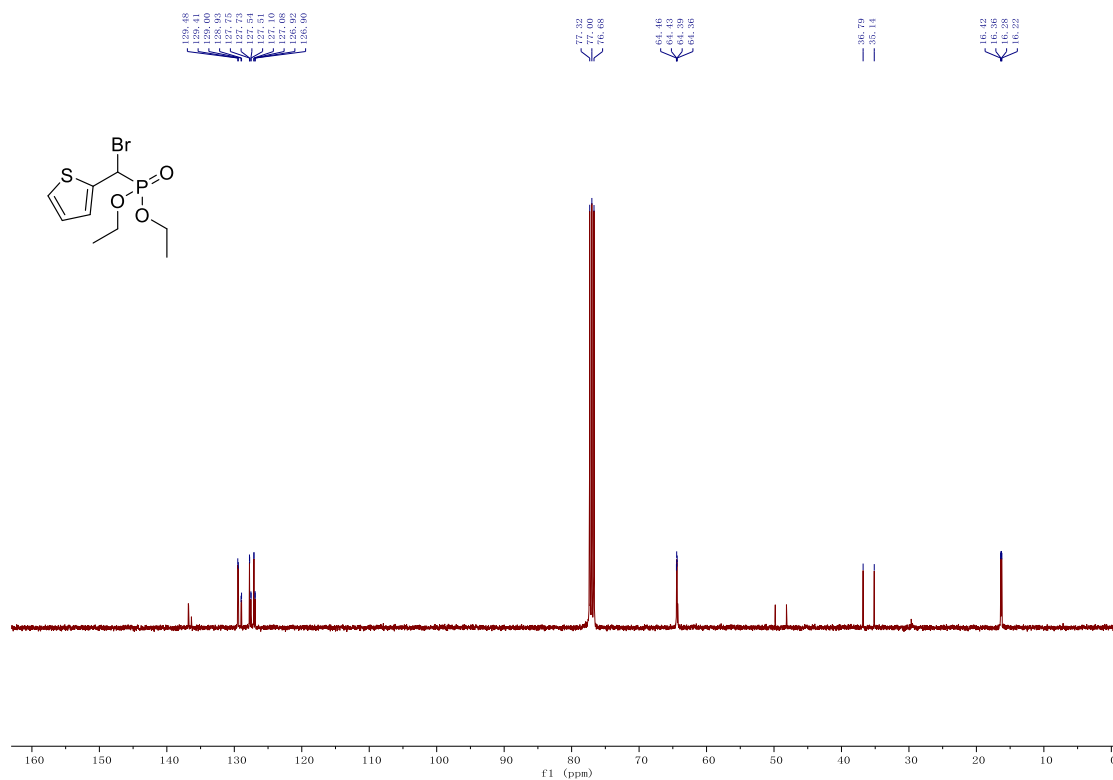

Figure S34 <sup>13</sup>C NMR (101 MHz, CDCl<sub>3</sub>) spectrum of 1m

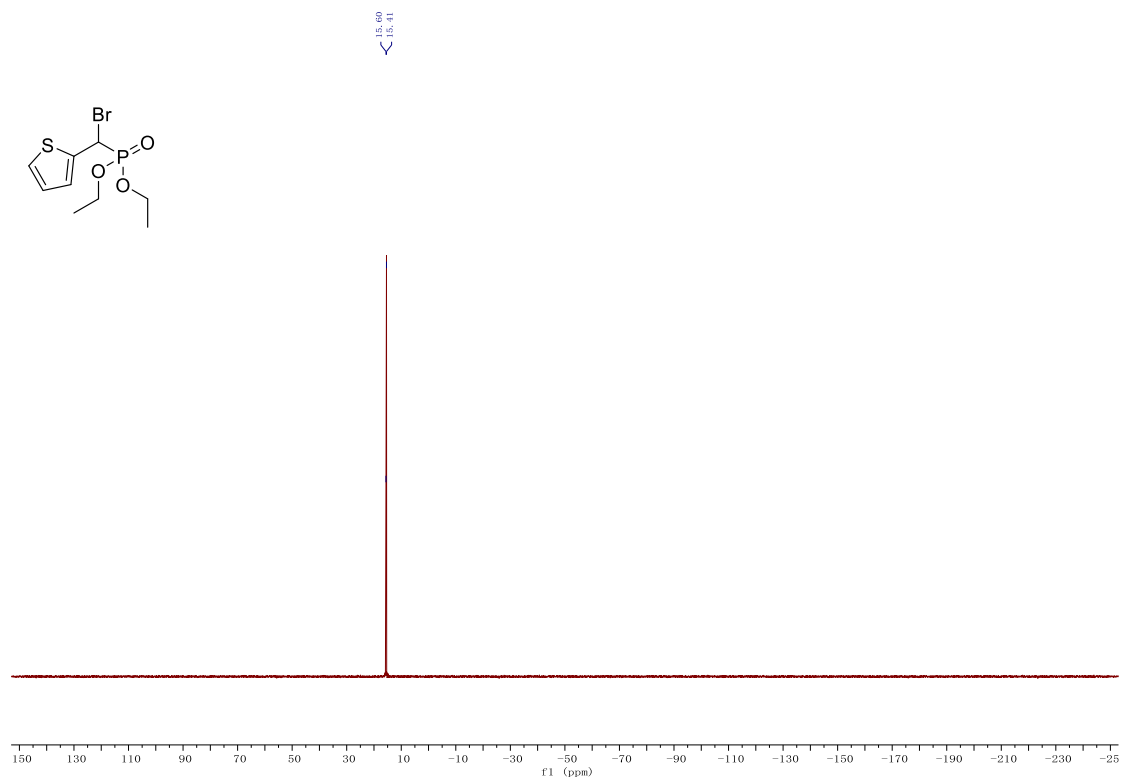

Figure S35.  $^{31}\text{P}$  NMR (162 MHz,  $\text{CDCl}_3$ ) spectrum of 1m

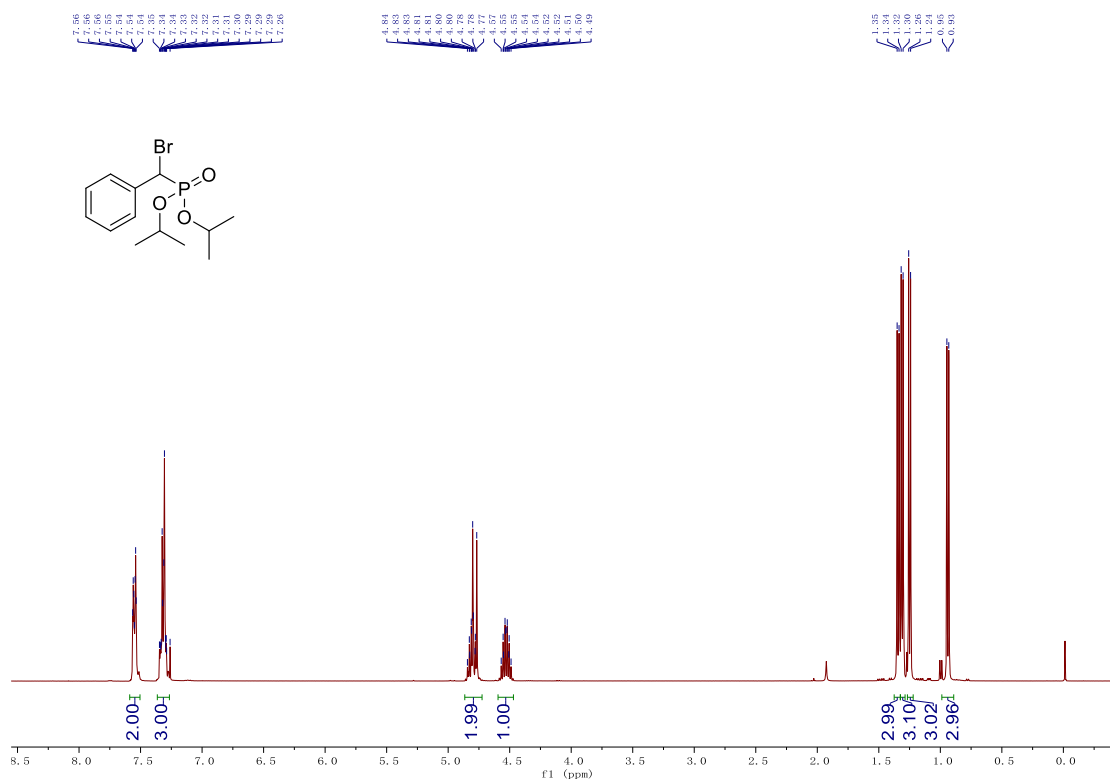

Figure S36.  $^1\text{H}$  NMR (400 MHz,  $\text{CDCl}_3$ ) spectrum of 1n

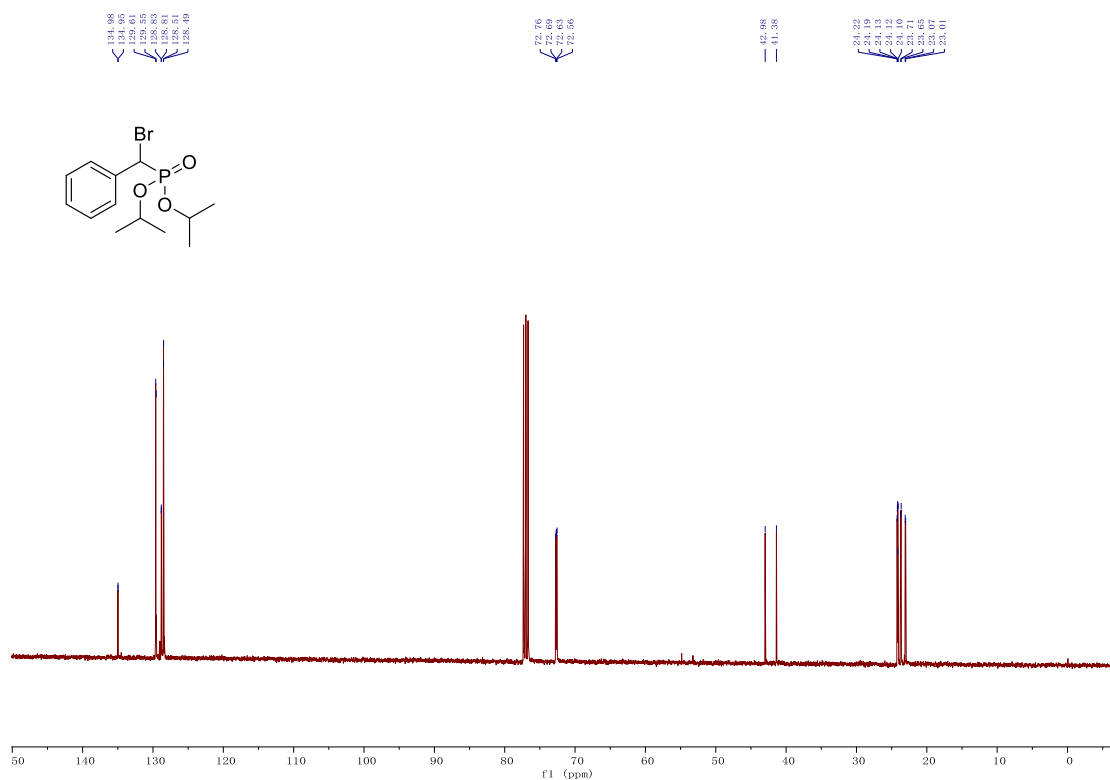

Figure S37. <sup>13</sup>C NMR (101 MHz, CDCl<sub>3</sub>) spectrum of **1n**

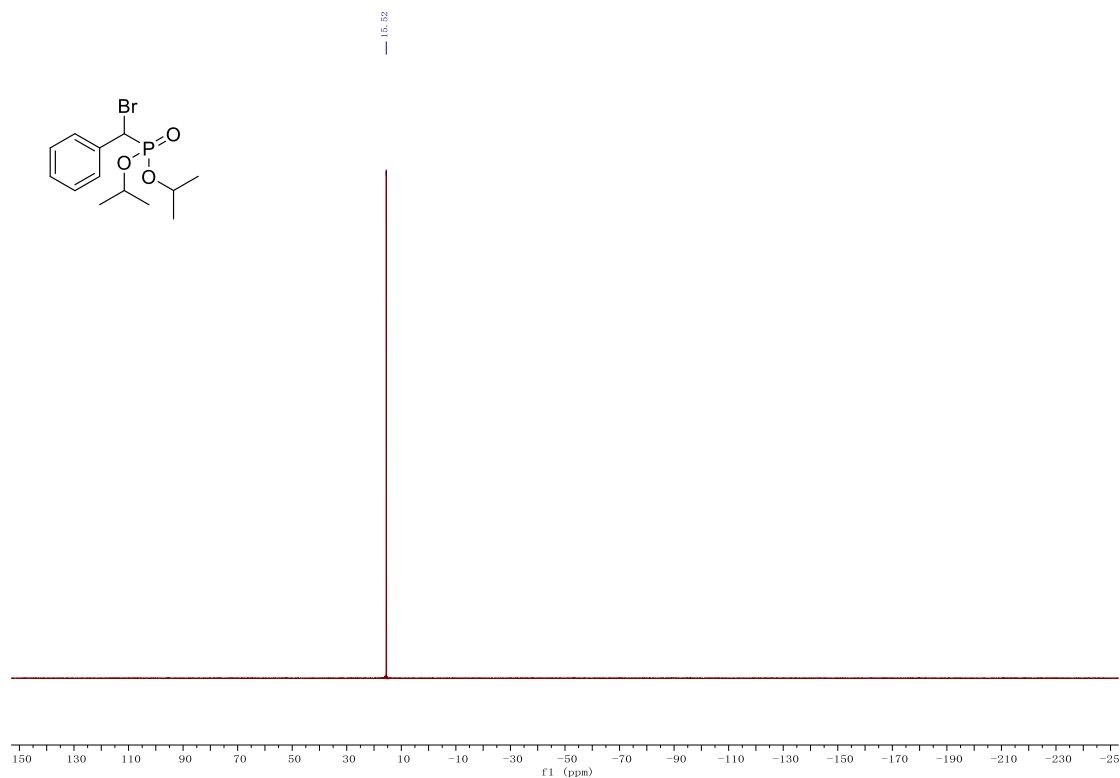

Figure S38. <sup>31</sup>P NMR (162 MHz, CDCl<sub>3</sub>) spectrum of **1n**

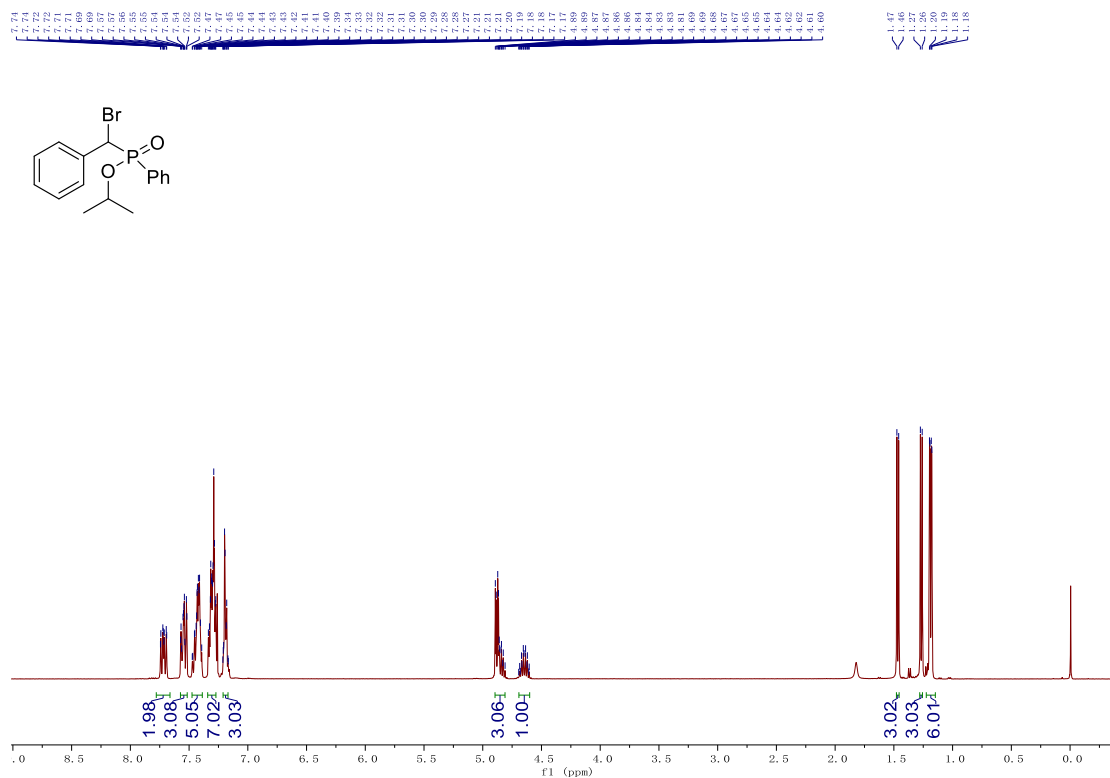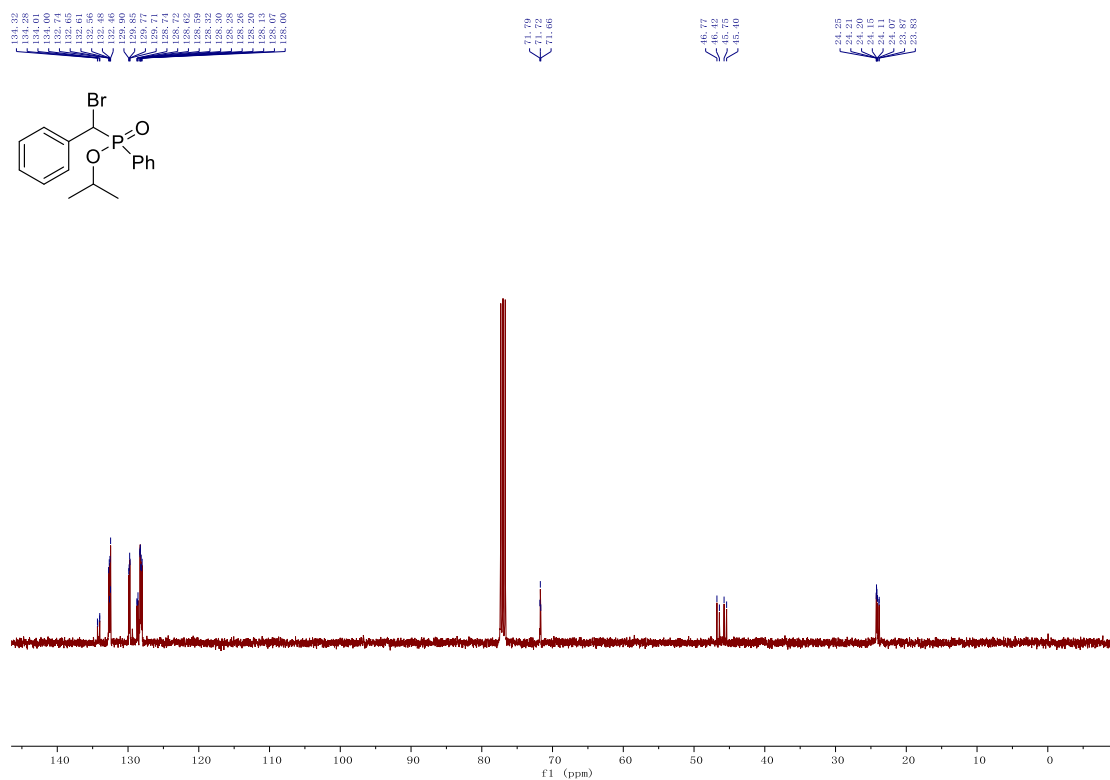

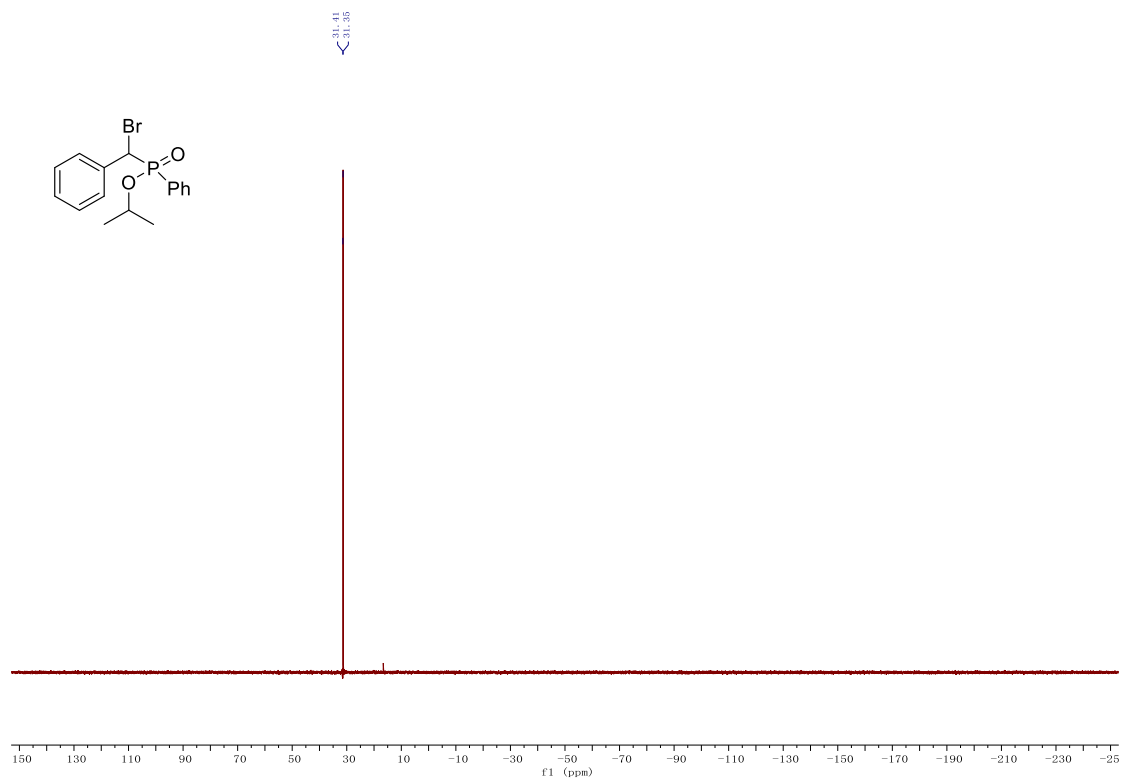

Figure S41.  $^{31}\text{P}$  NMR (162 MHz,  $\text{CDCl}_3$ ) spectrum of **1o**

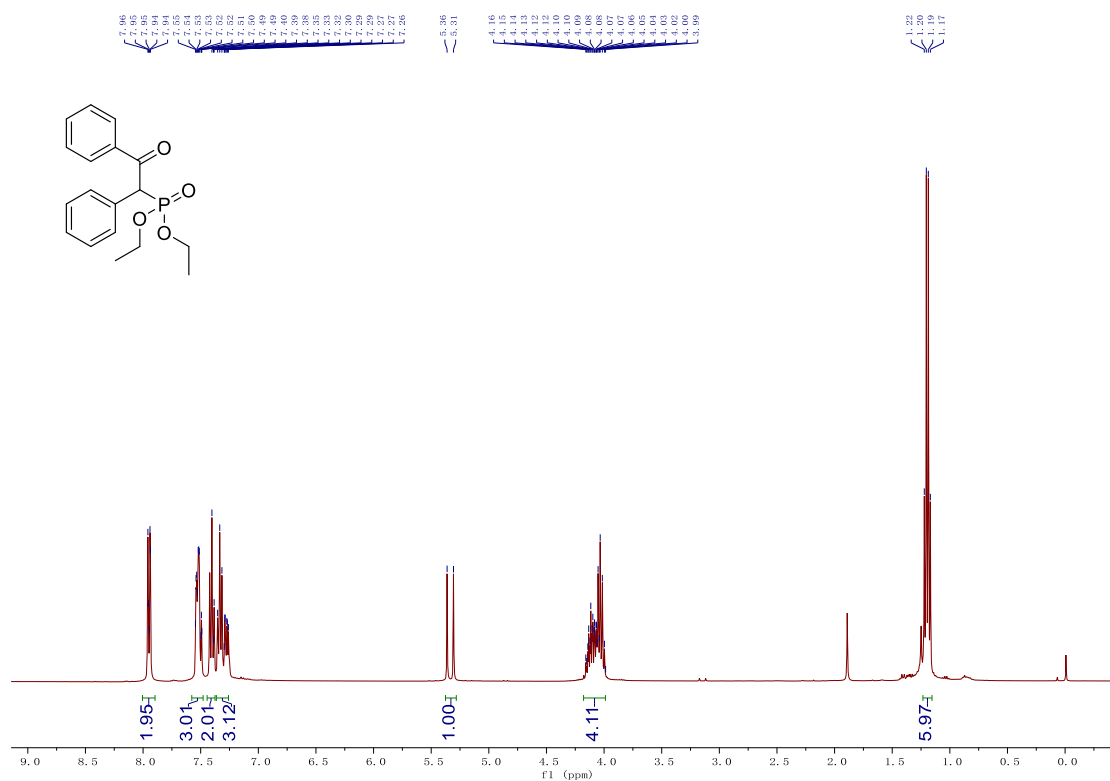

Figure S42.  $^1\text{H}$  NMR (400 MHz,  $\text{CDCl}_3$ ) spectrum of **3a**

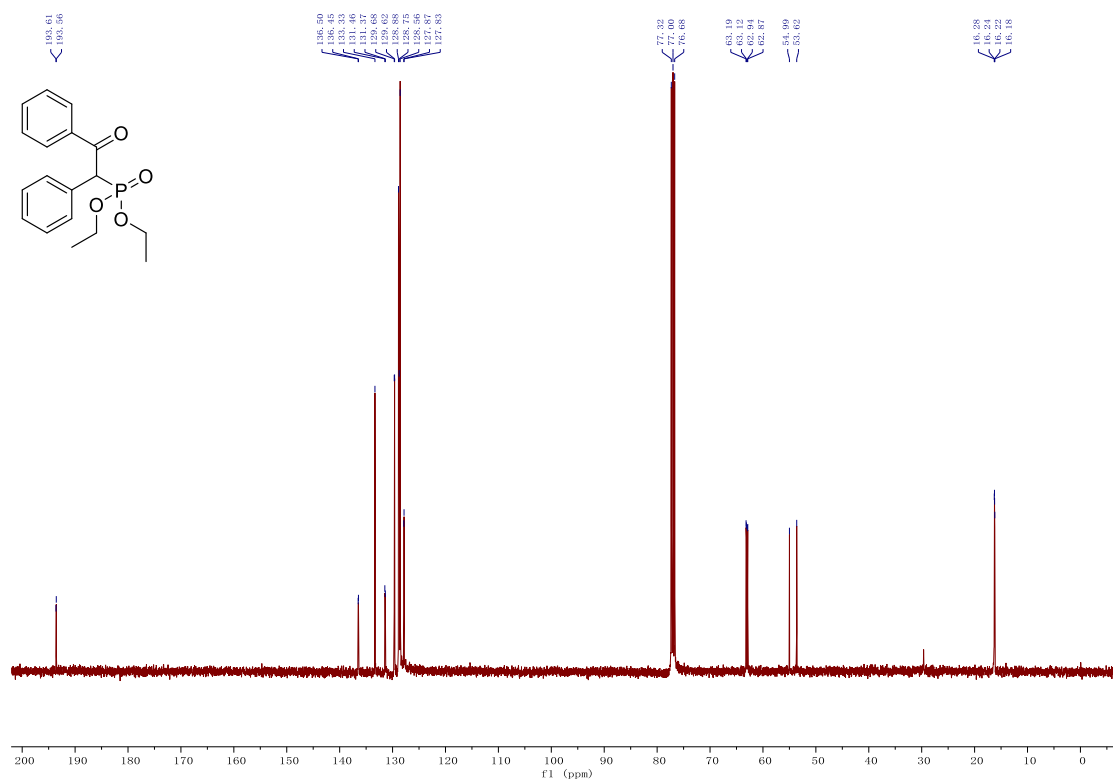

Figure S43.  $^{13}\text{C}$  NMR (101 MHz,  $\text{CDCl}_3$ ) spectrum of 3a

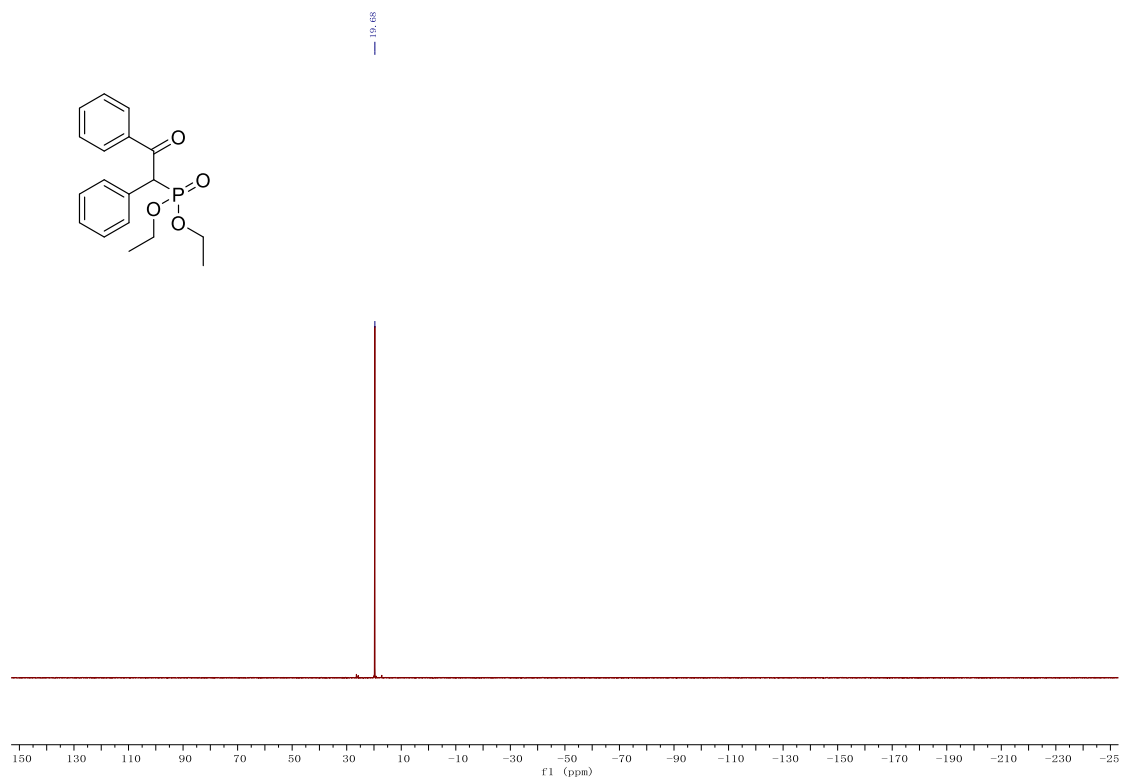

Figure S44.  $^{31}\text{P}$  NMR (162 MHz,  $\text{CDCl}_3$ ) spectrum of 3a

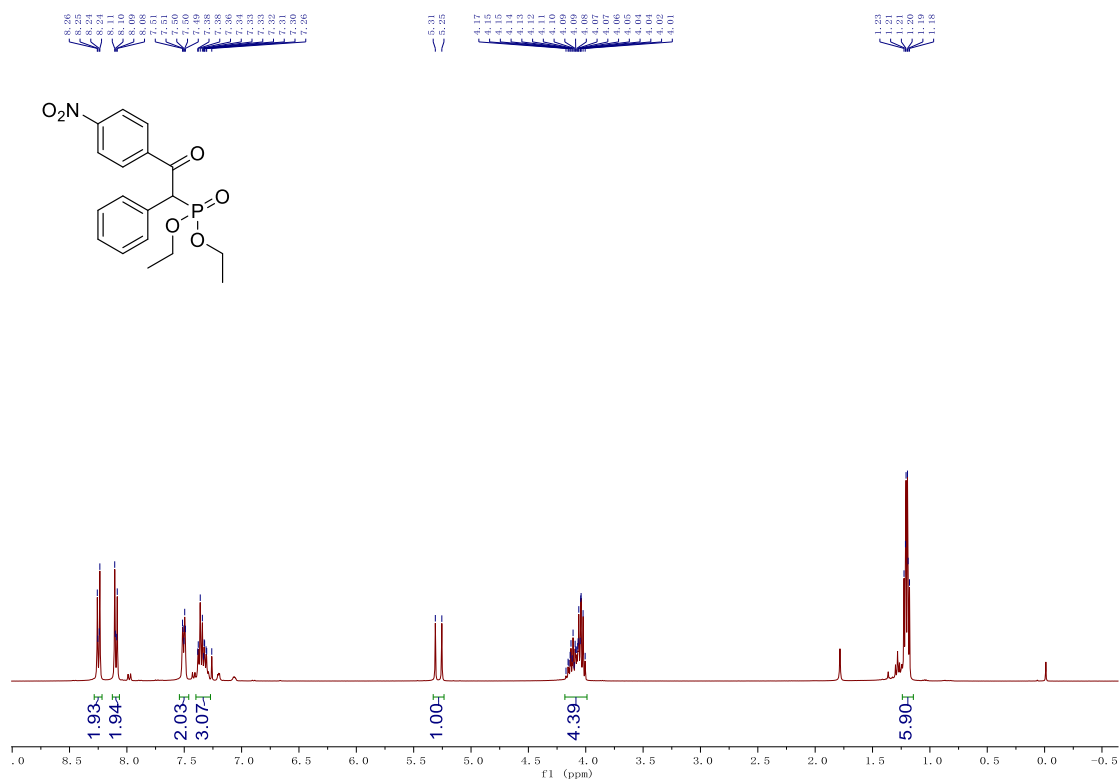

Figure S45. <sup>1</sup>H NMR (400 MHz, CDCl<sub>3</sub>) spectrum of **3b**

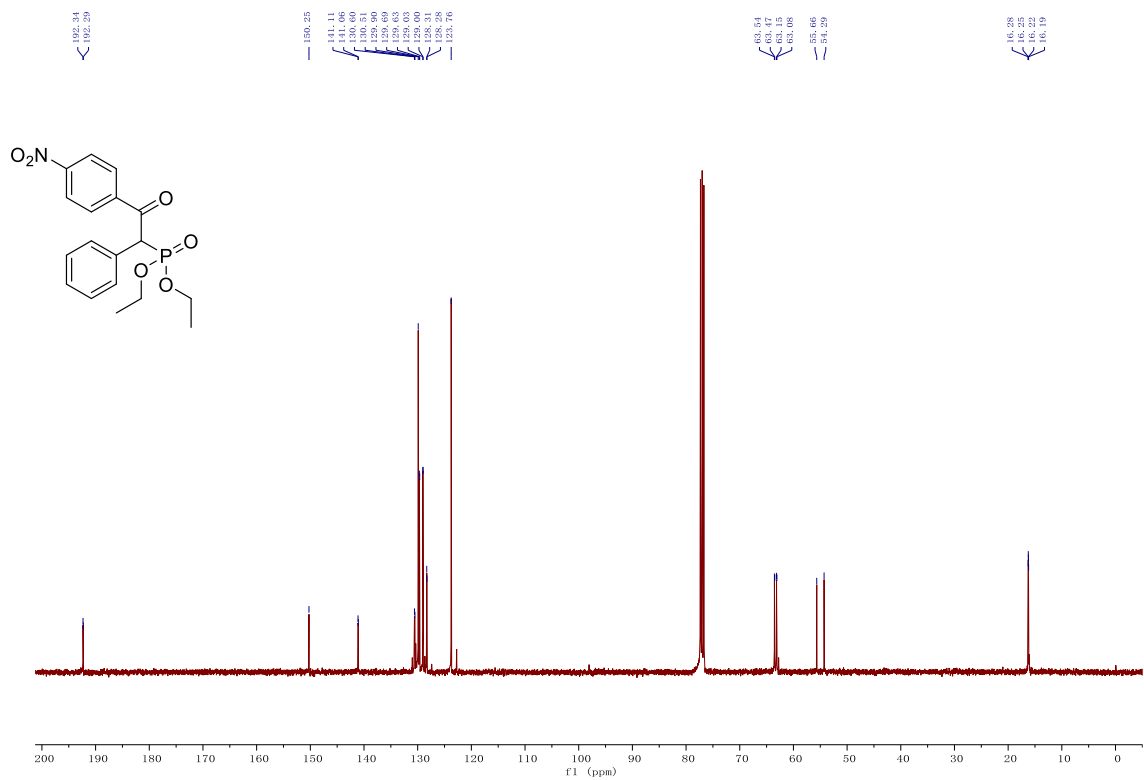

Figure S46. <sup>13</sup>C NMR (101 MHz, CDCl<sub>3</sub>) spectrum of **3b**

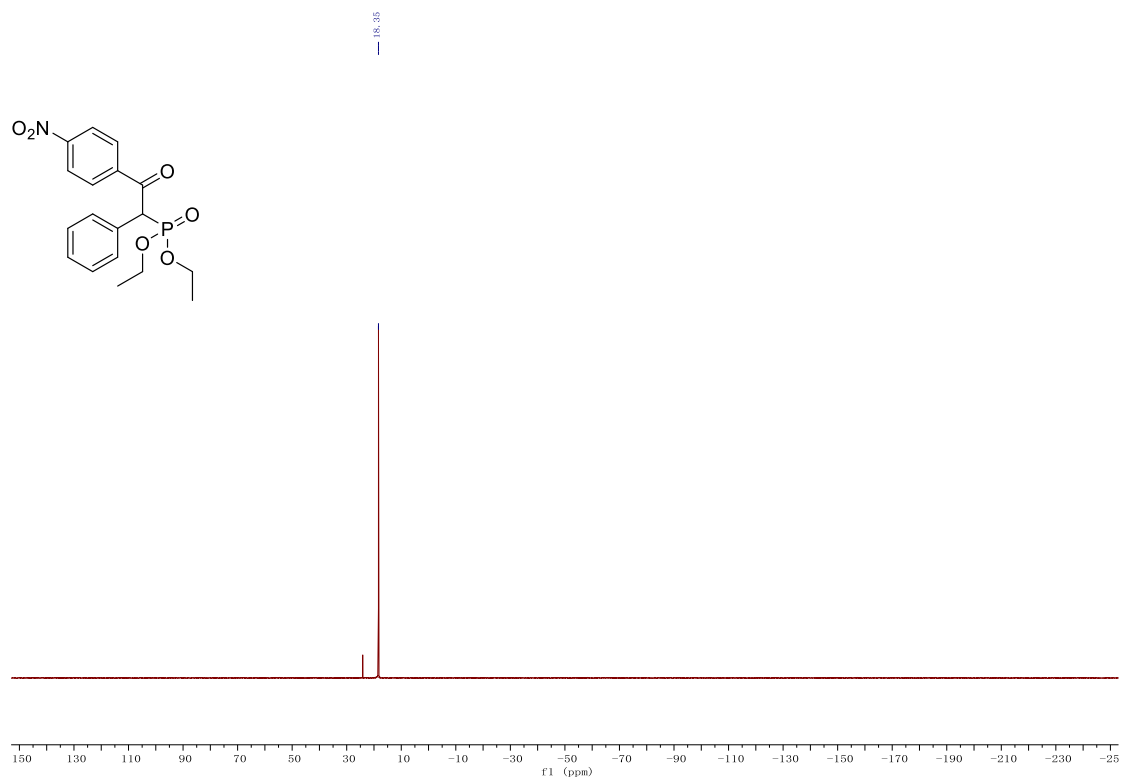

Figure S47.  $^{31}\text{P}$  NMR (162 MHz,  $\text{CDCl}_3$ ) spectrum of **3b**

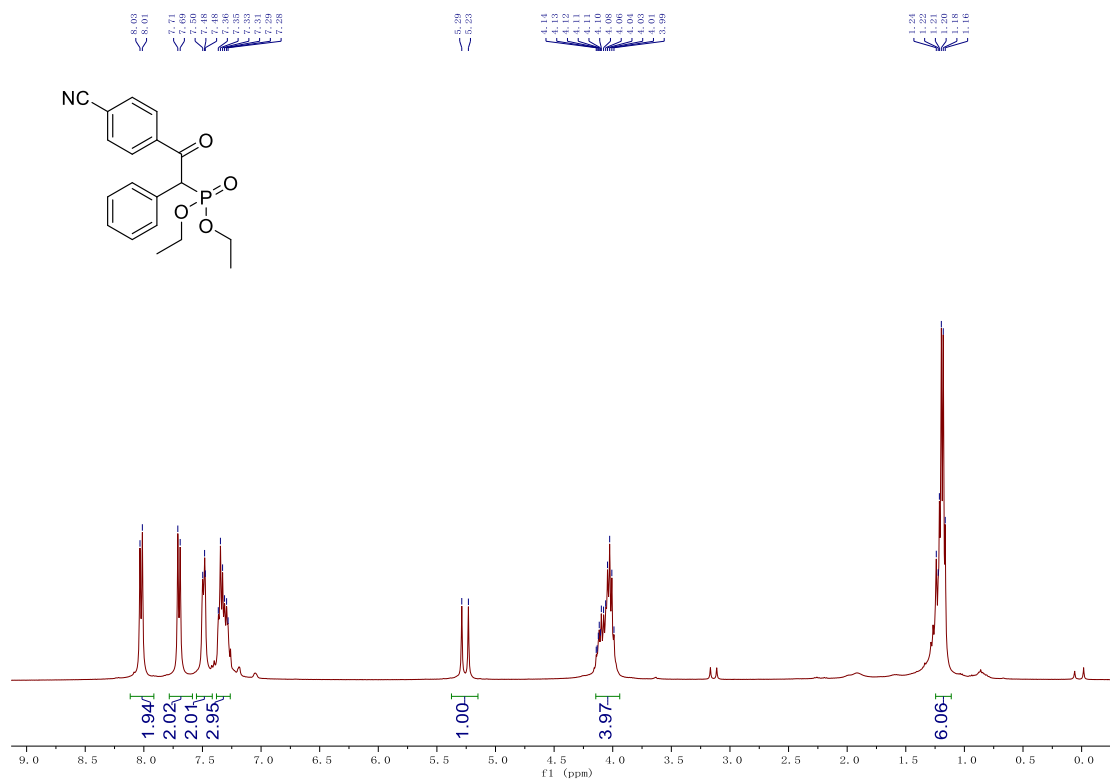

Figure S48.  $^1\text{H}$  NMR (400 MHz,  $\text{CDCl}_3$ ) spectrum of **3c**

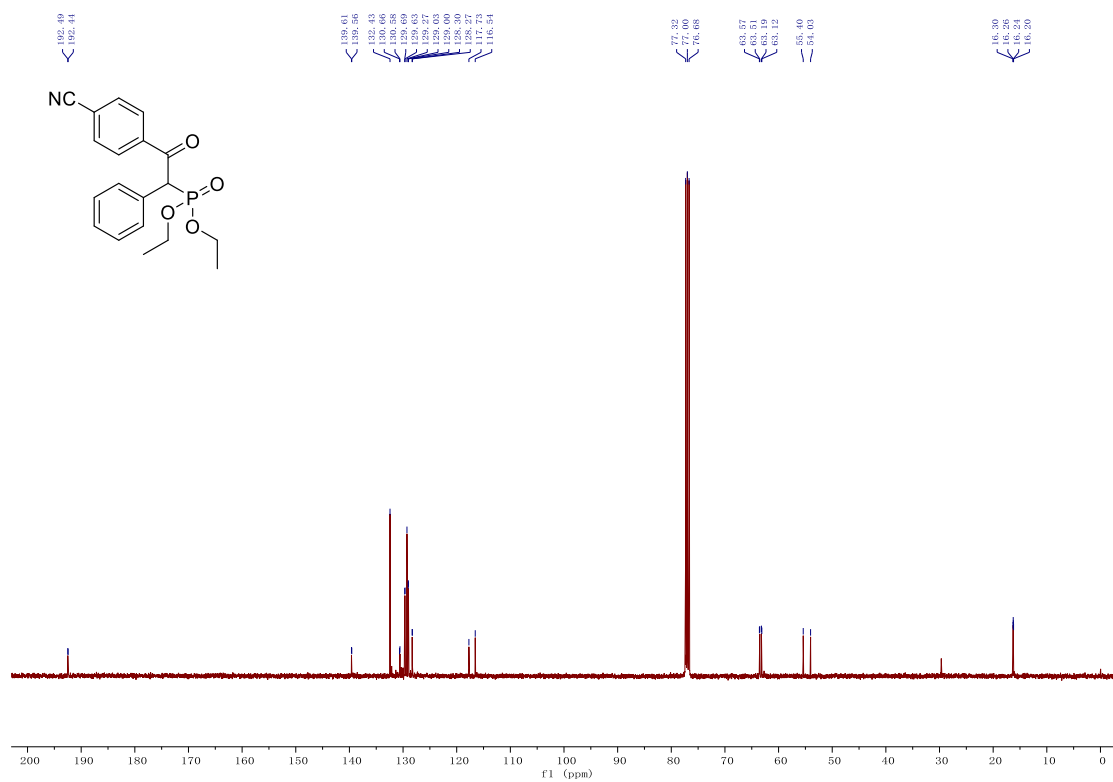

Figure S49. <sup>13</sup>C NMR (101 MHz, CDCl<sub>3</sub>) spectrum of 3c

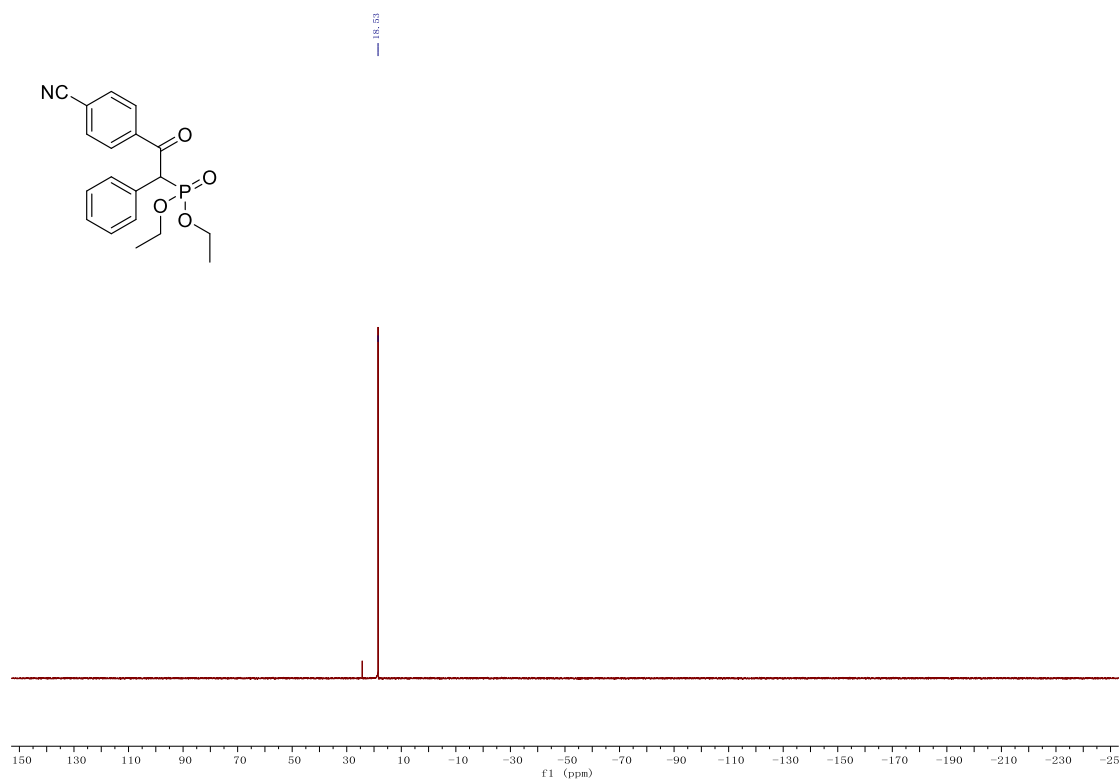

Figure S50. <sup>31</sup>P NMR (162 MHz, CDCl<sub>3</sub>) spectrum of 3c

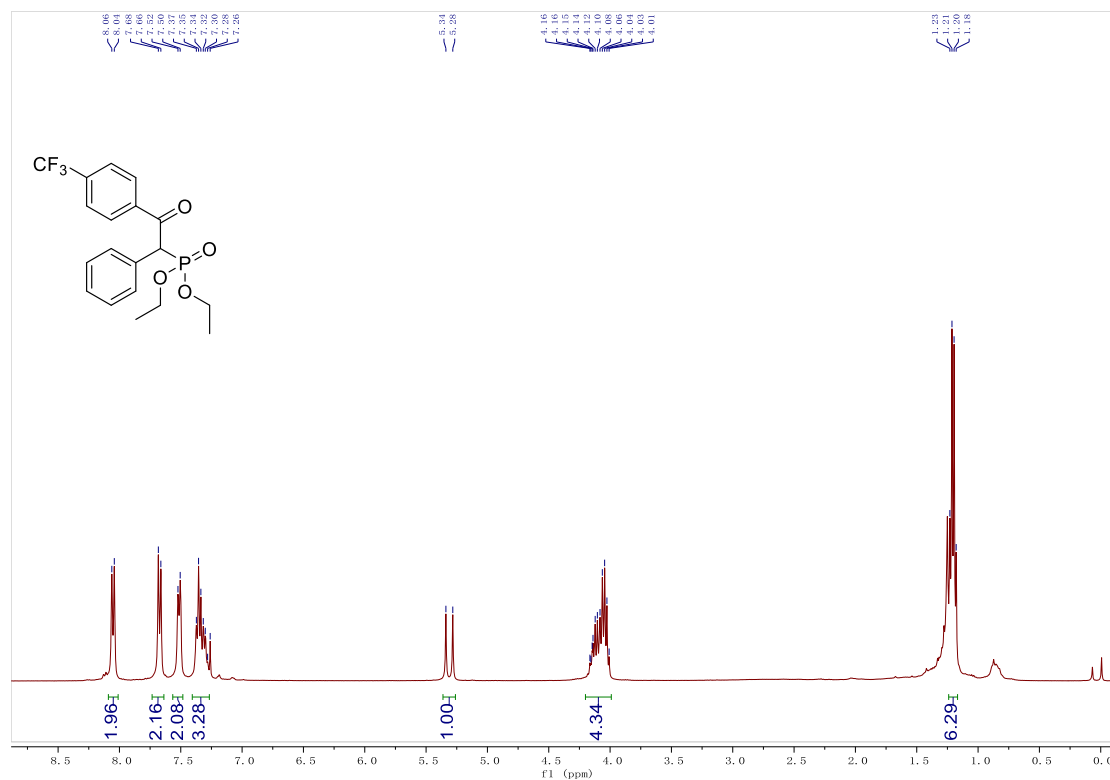

Figure S51. <sup>1</sup>H NMR (400 MHz, CDCl<sub>3</sub>) spectrum of 3d

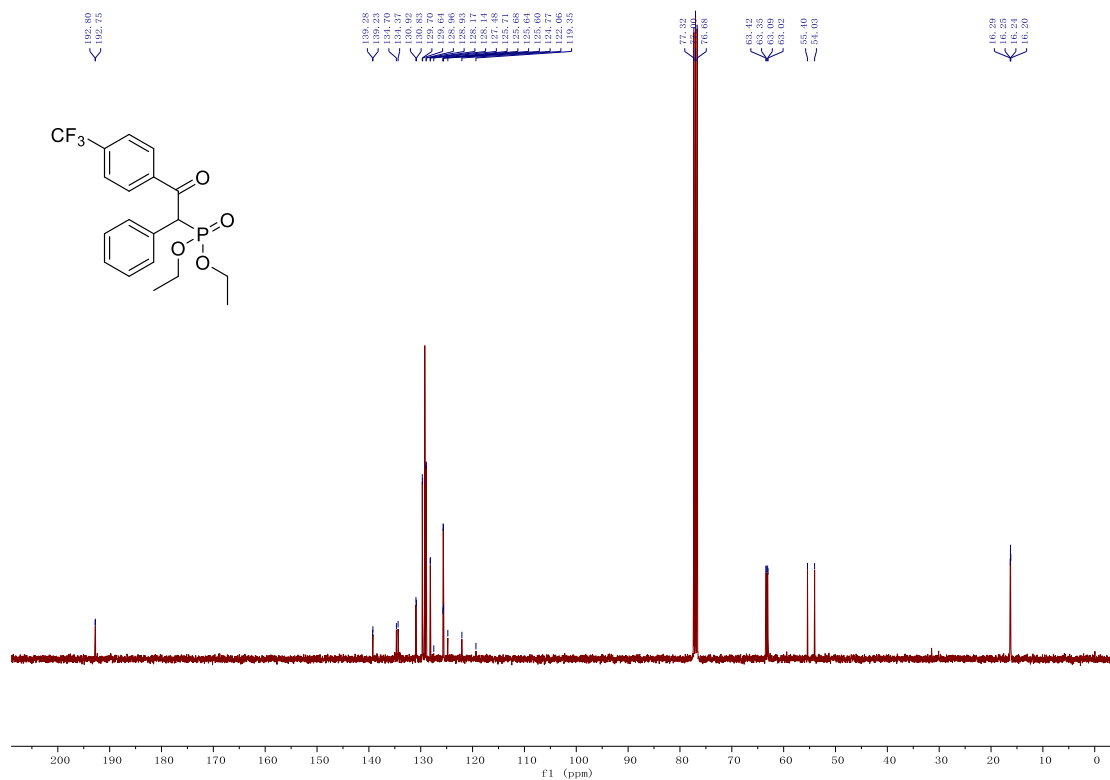

Figure S52. <sup>13</sup>C NMR (101 MHz, CDCl<sub>3</sub>) spectrum of 3d

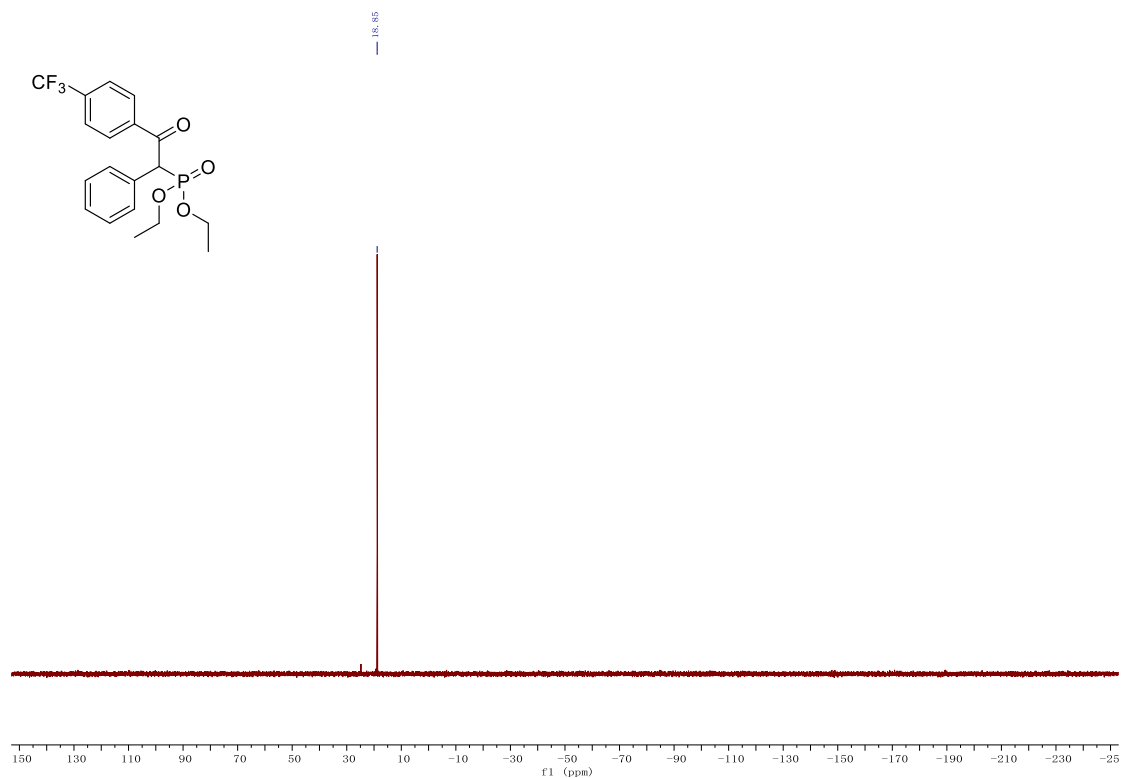

Figure S53.  $^{31}\text{P}$  NMR (162 MHz,  $\text{CDCl}_3$ ) spectrum of 3d

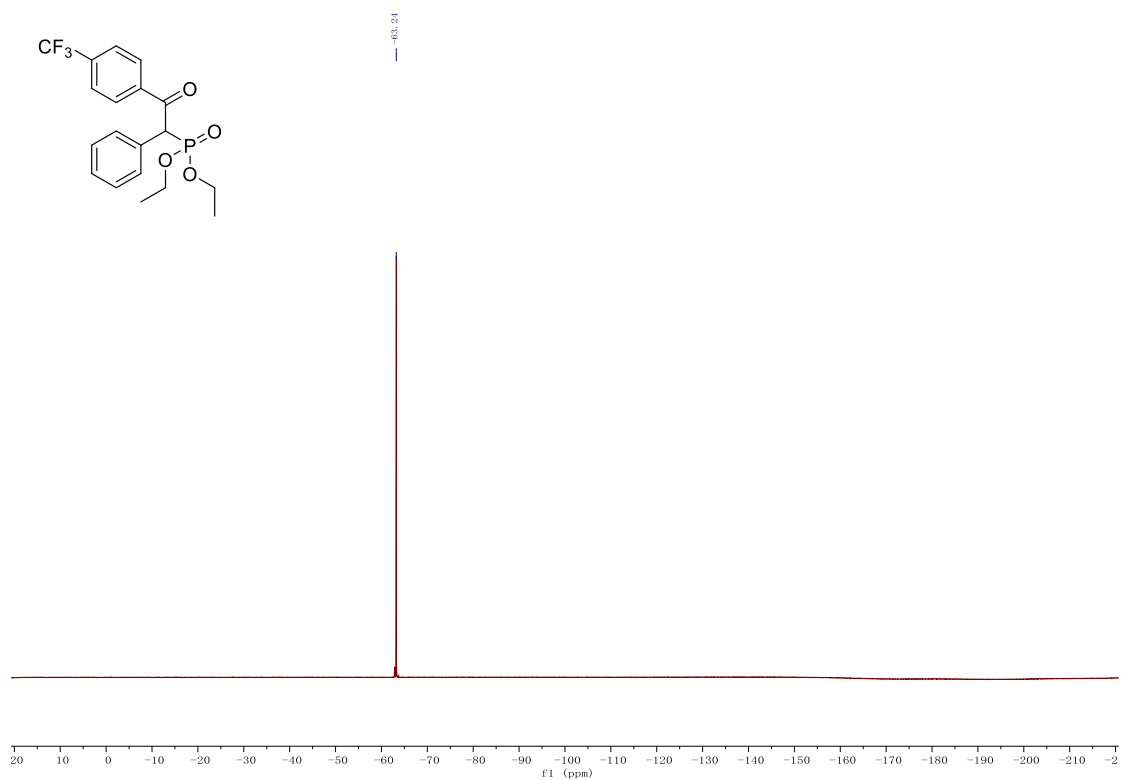

Figure S54.  $^{19}\text{F}$  NMR (377 MHz,  $\text{CDCl}_3$ ) spectrum of 3d

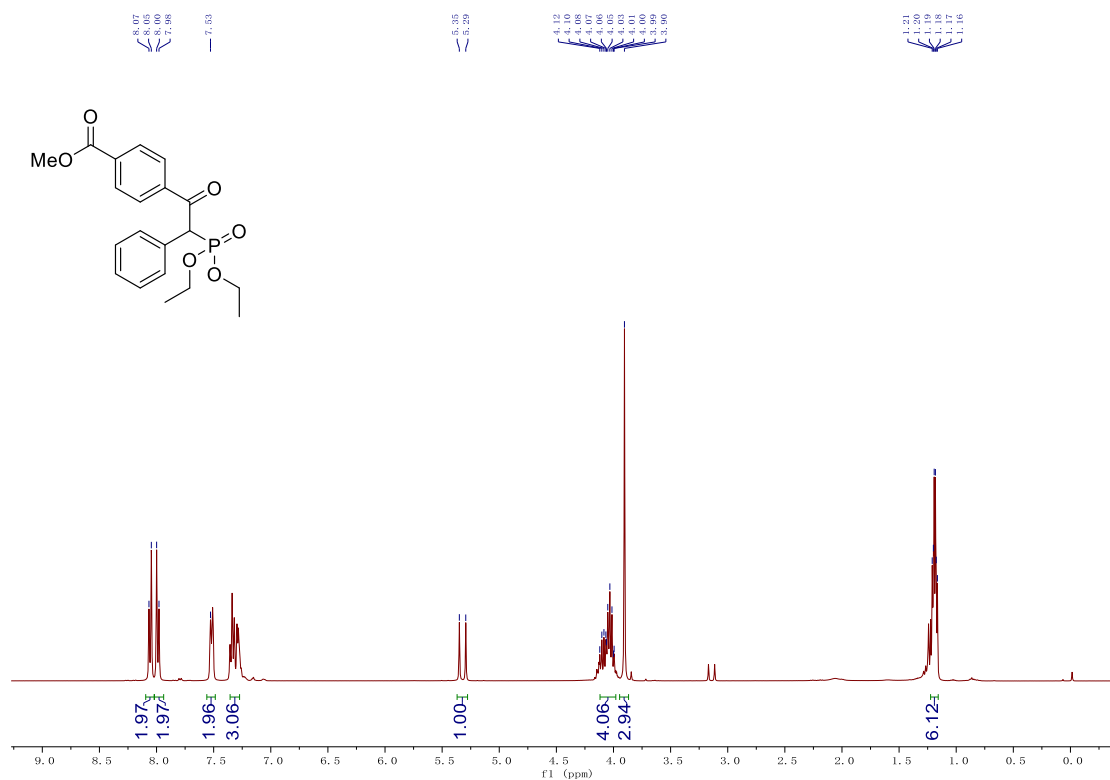

Figure S55. <sup>1</sup>H NMR (400 MHz, CDCl<sub>3</sub>) spectrum of 3e

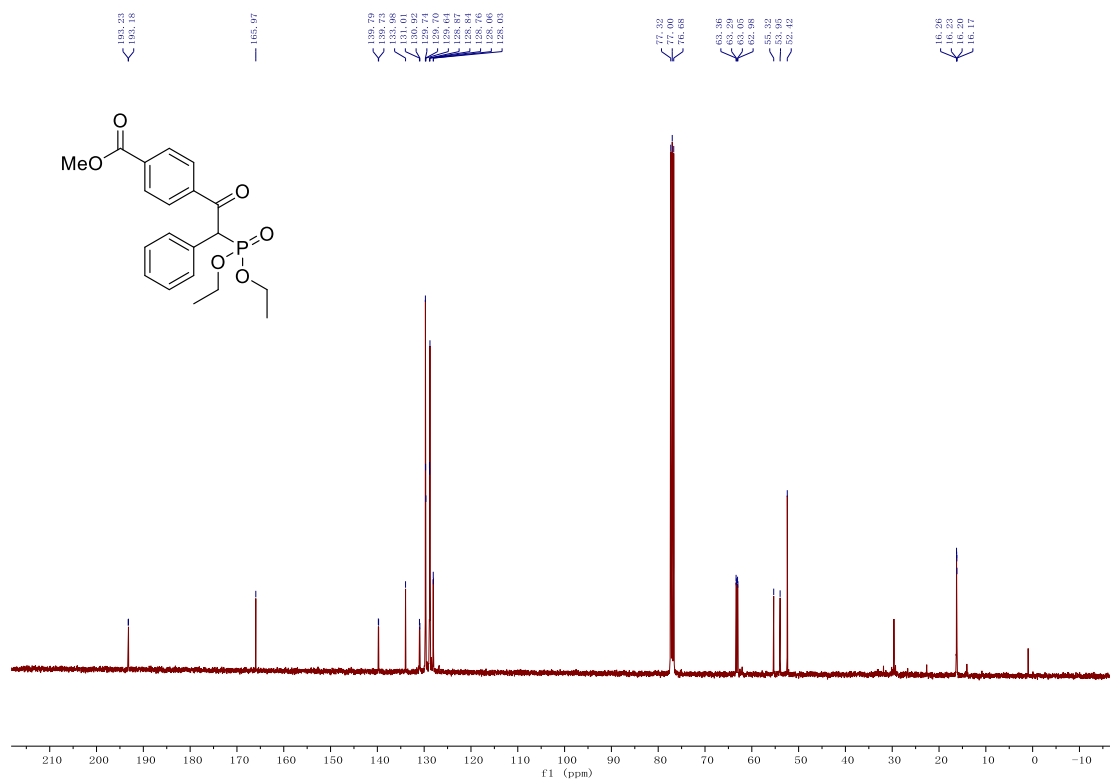

Figure S56. <sup>13</sup>C NMR (101 MHz, CDCl<sub>3</sub>) spectrum of 3e

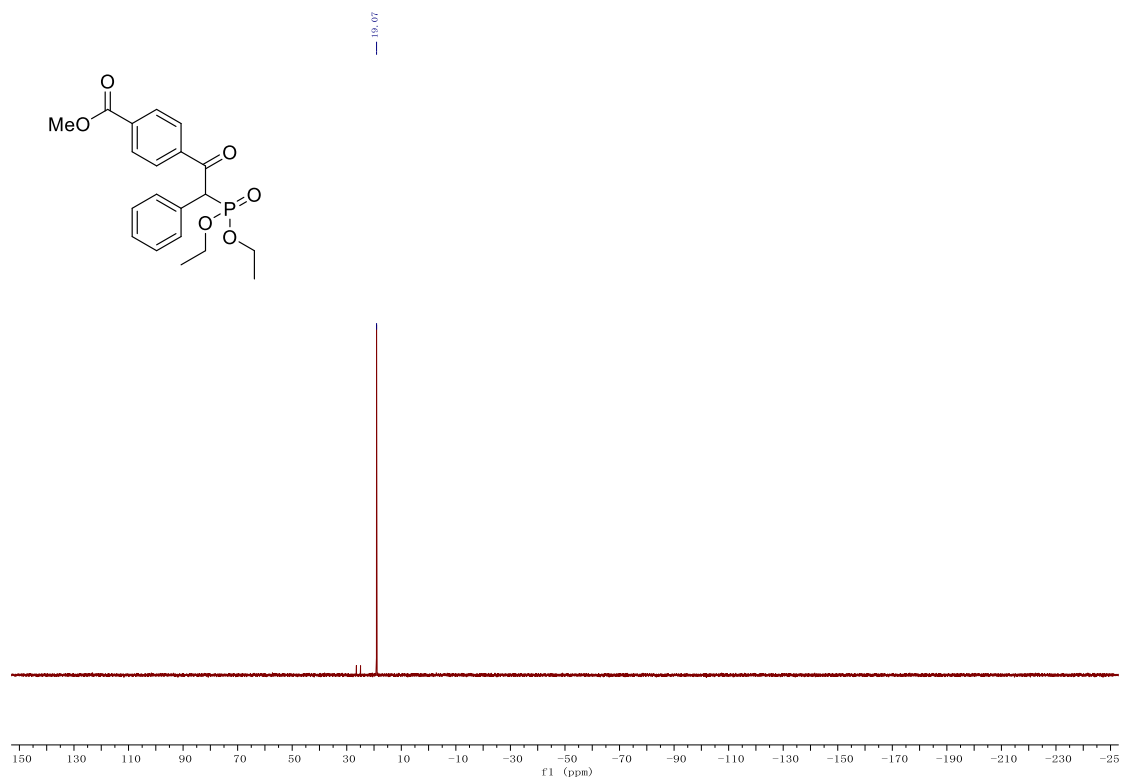

Figure S57. <sup>31</sup>P NMR (162 MHz, CDCl<sub>3</sub>) spectrum of 3e

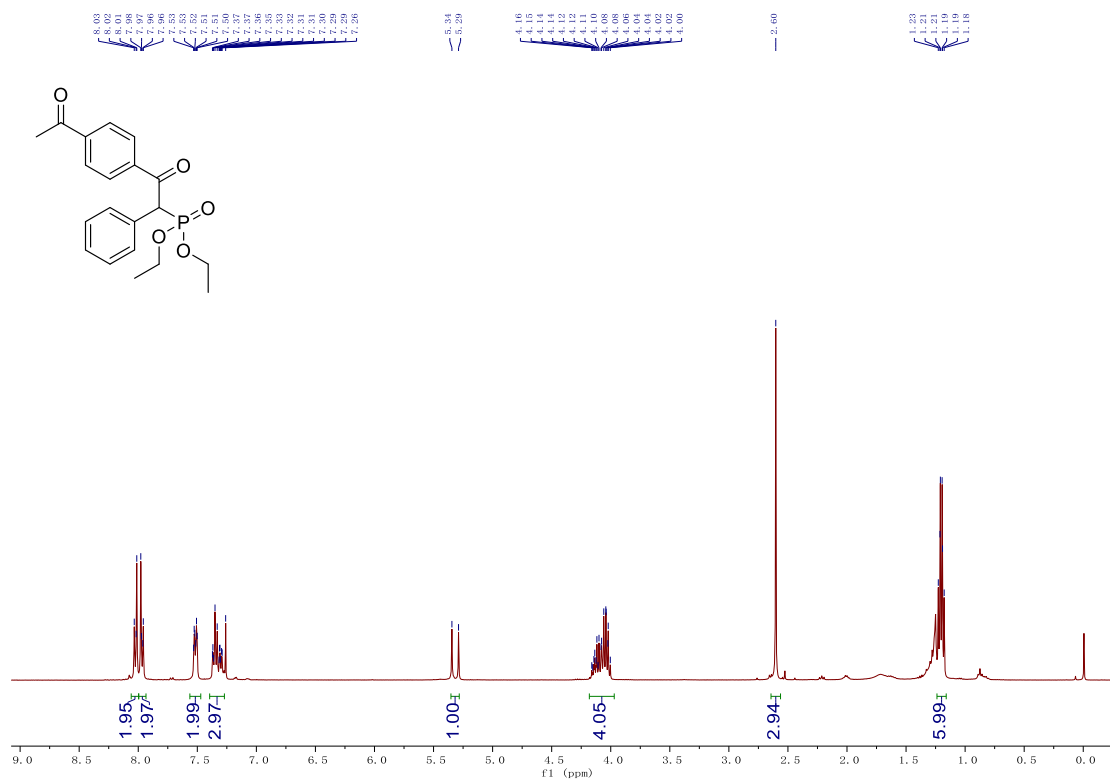

Figure S58. <sup>1</sup>H NMR (400 MHz, CDCl<sub>3</sub>) spectrum of 3f

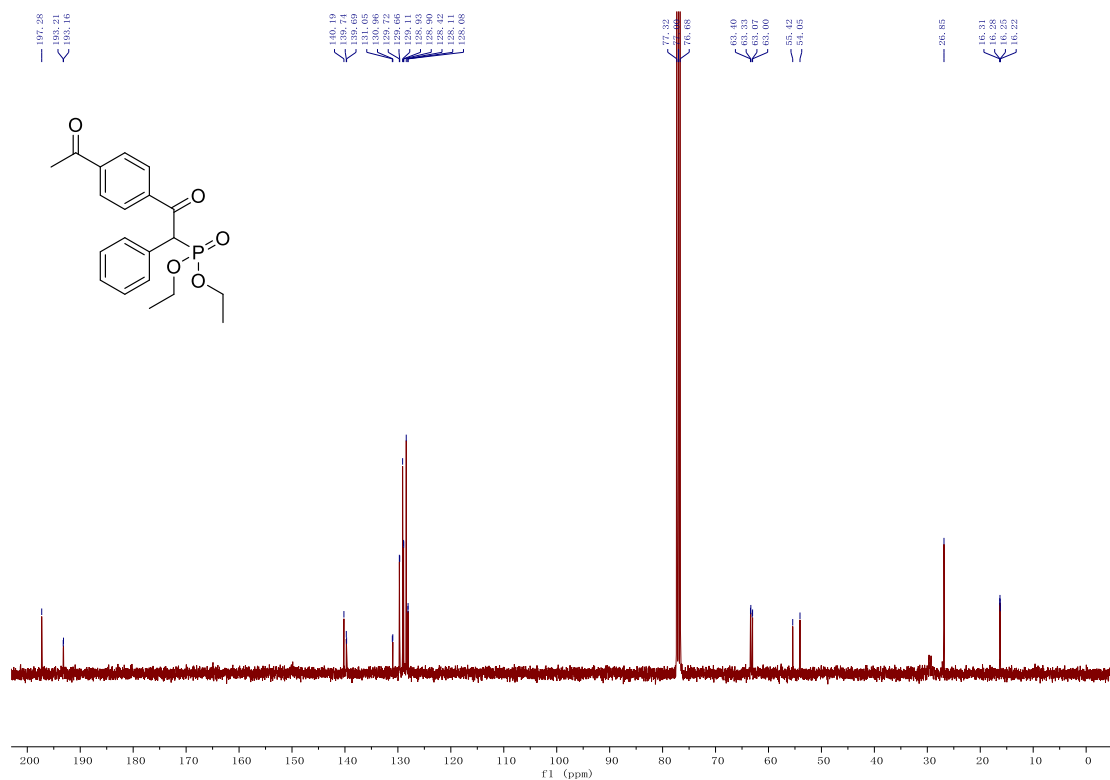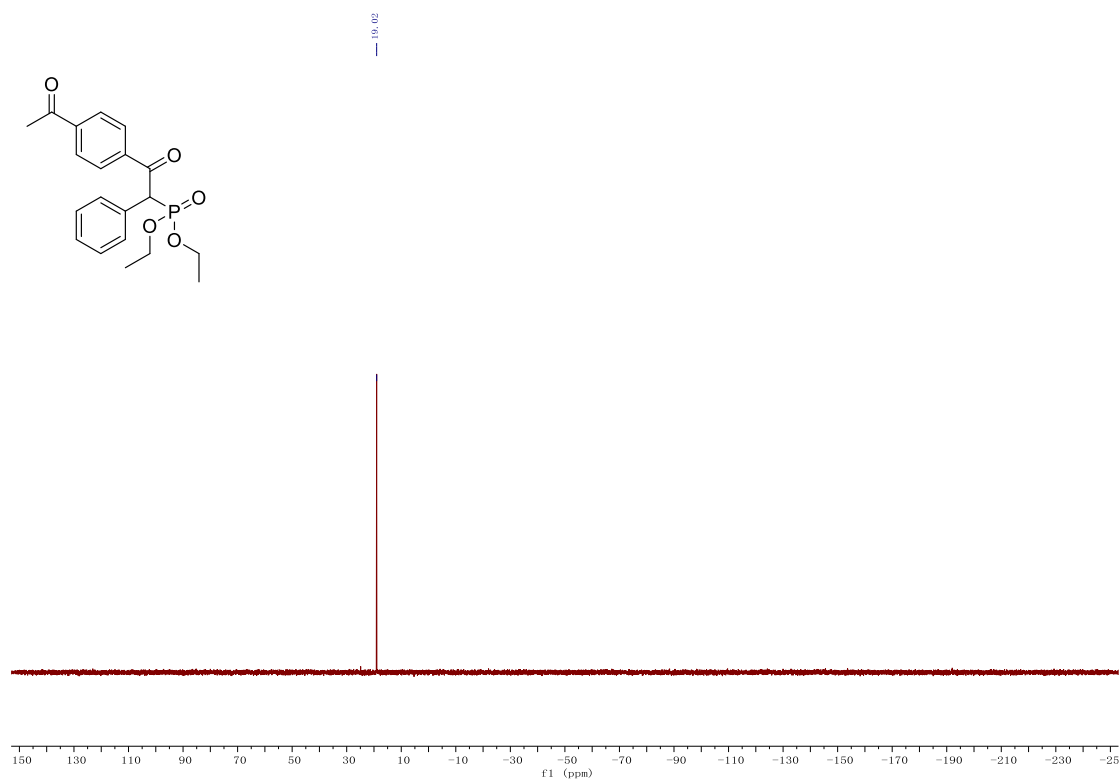

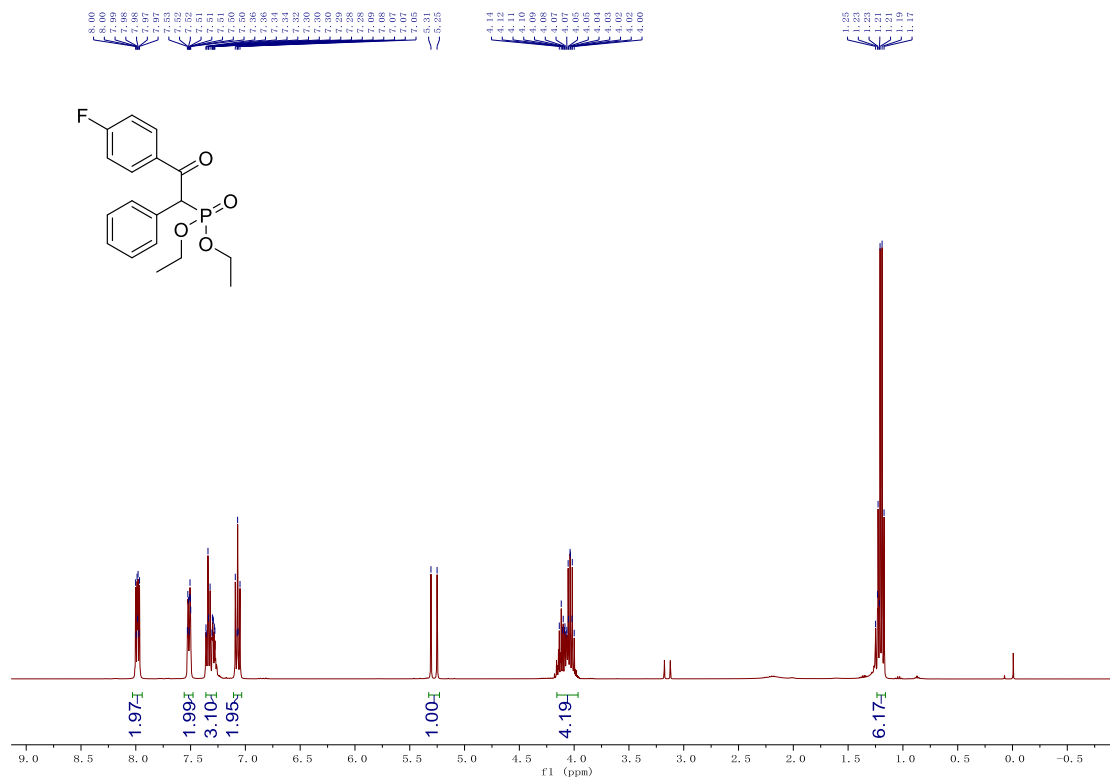

Figure S61. <sup>1</sup>H NMR (400 MHz, CDCl<sub>3</sub>) spectrum of 3g

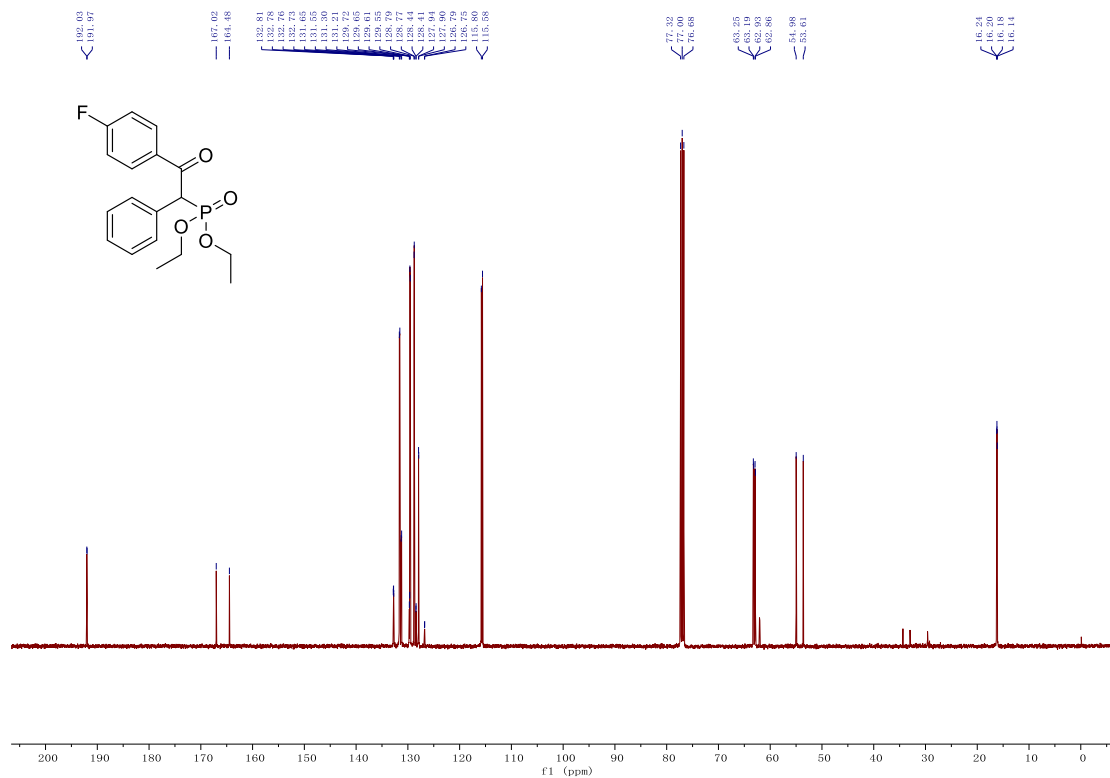

Figure S62. <sup>13</sup>C NMR (101 MHz, CDCl<sub>3</sub>) spectrum of 3g

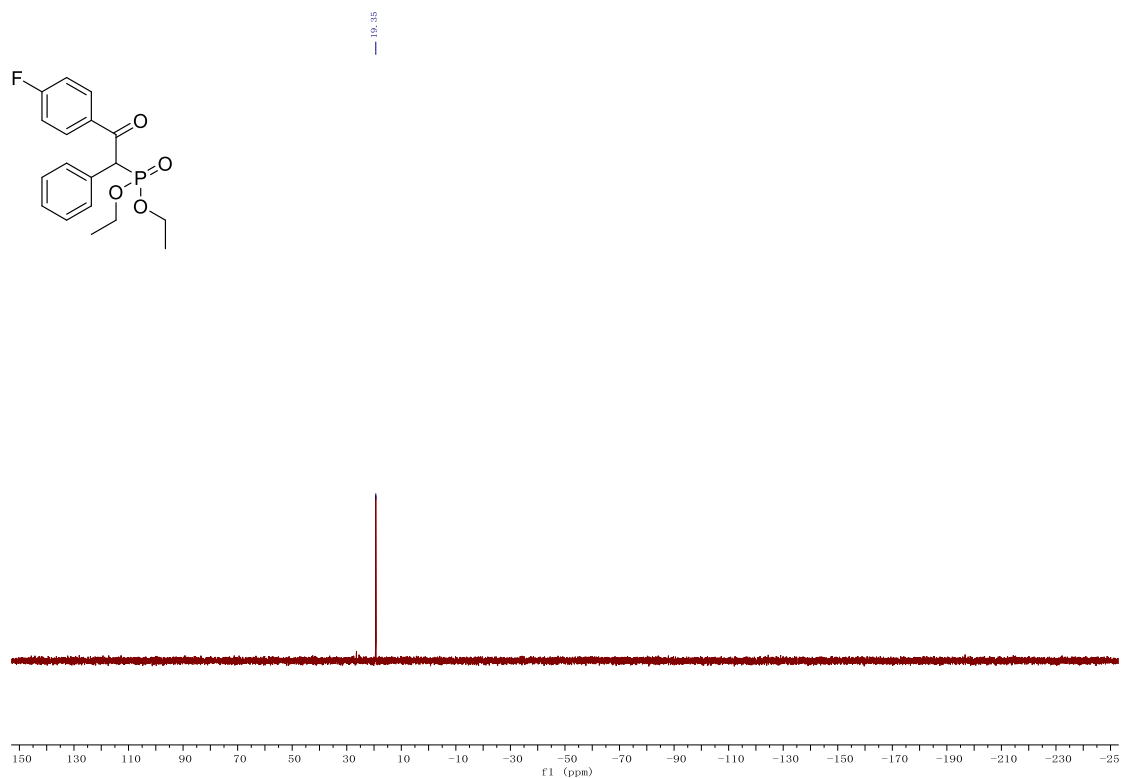

Figure S63.  $^{31}\text{P}$  NMR (162 MHz,  $\text{CDCl}_3$ ) spectrum of **3g**

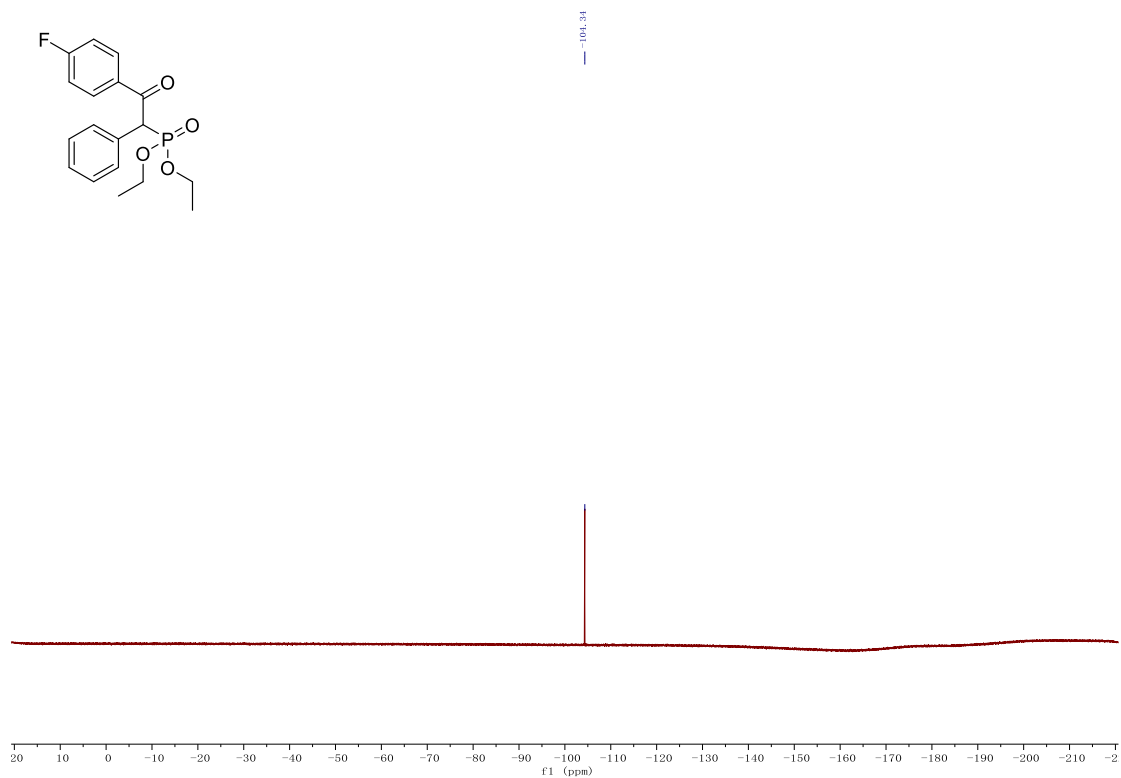

Figure S64.  $^{19}\text{F}$  NMR (377 MHz,  $\text{CDCl}_3$ ) spectrum of **3g**

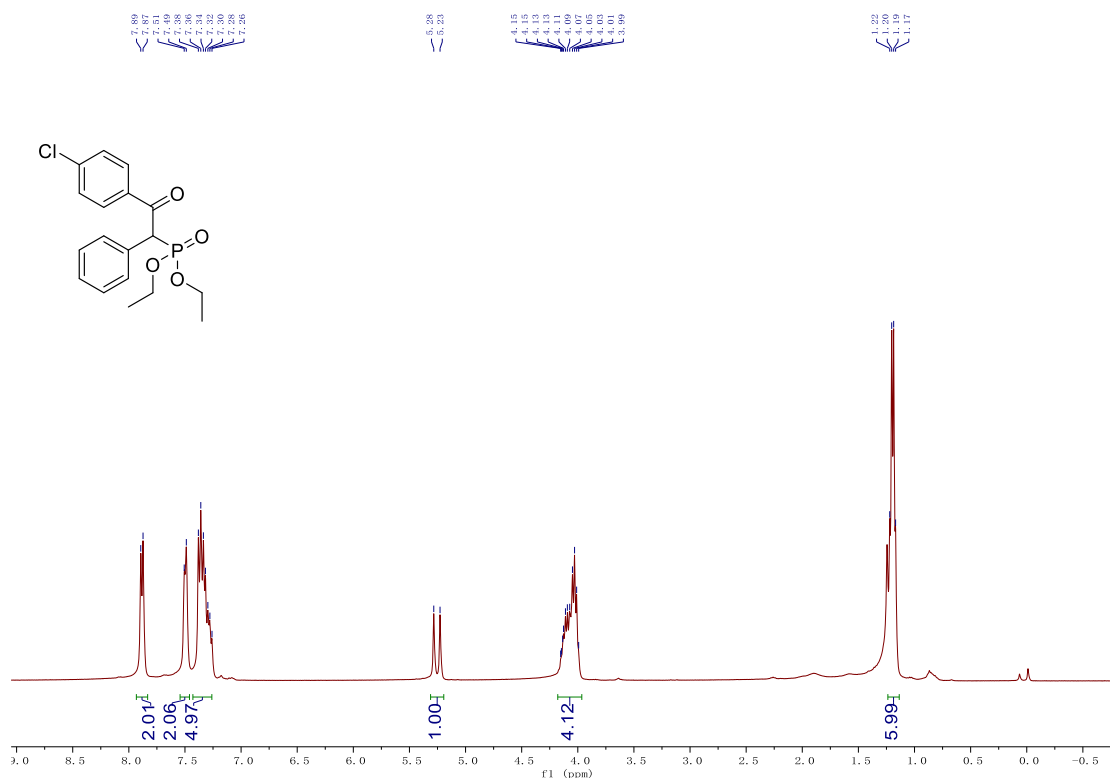

Figure S65. <sup>1</sup>H NMR (400 MHz, CDCl<sub>3</sub>) spectrum of 3h

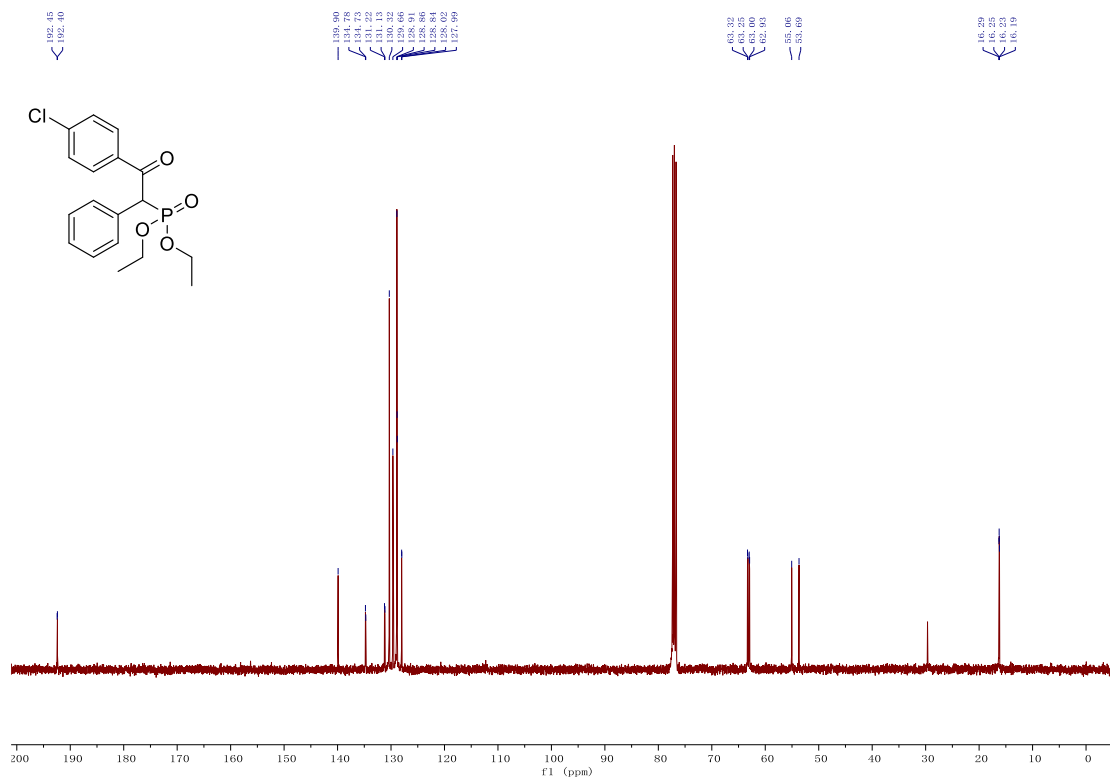

Figure S66. <sup>13</sup>C NMR (101 MHz, CDCl<sub>3</sub>) spectrum of 3h

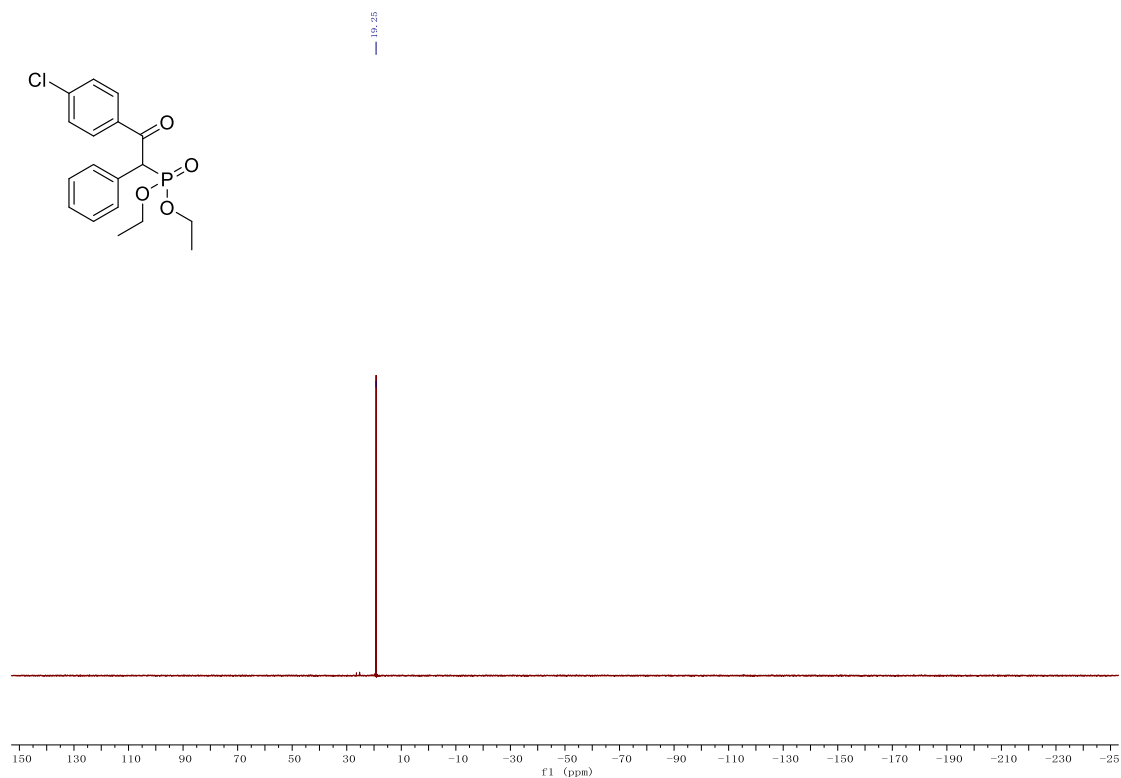

Figure S67.  $^{31}\text{P}$  NMR (162 MHz,  $\text{CDCl}_3$ ) spectrum of 3h

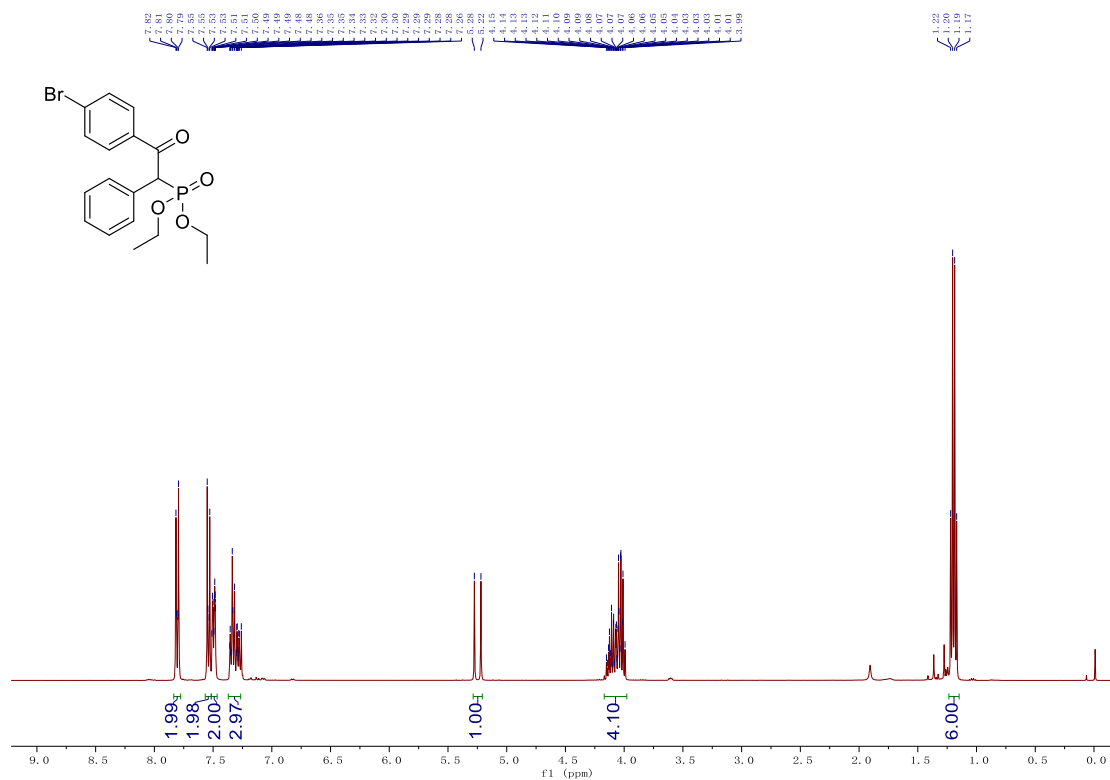

Figure S68.  $^1\text{H}$  NMR (400 MHz,  $\text{CDCl}_3$ ) spectrum of 3i

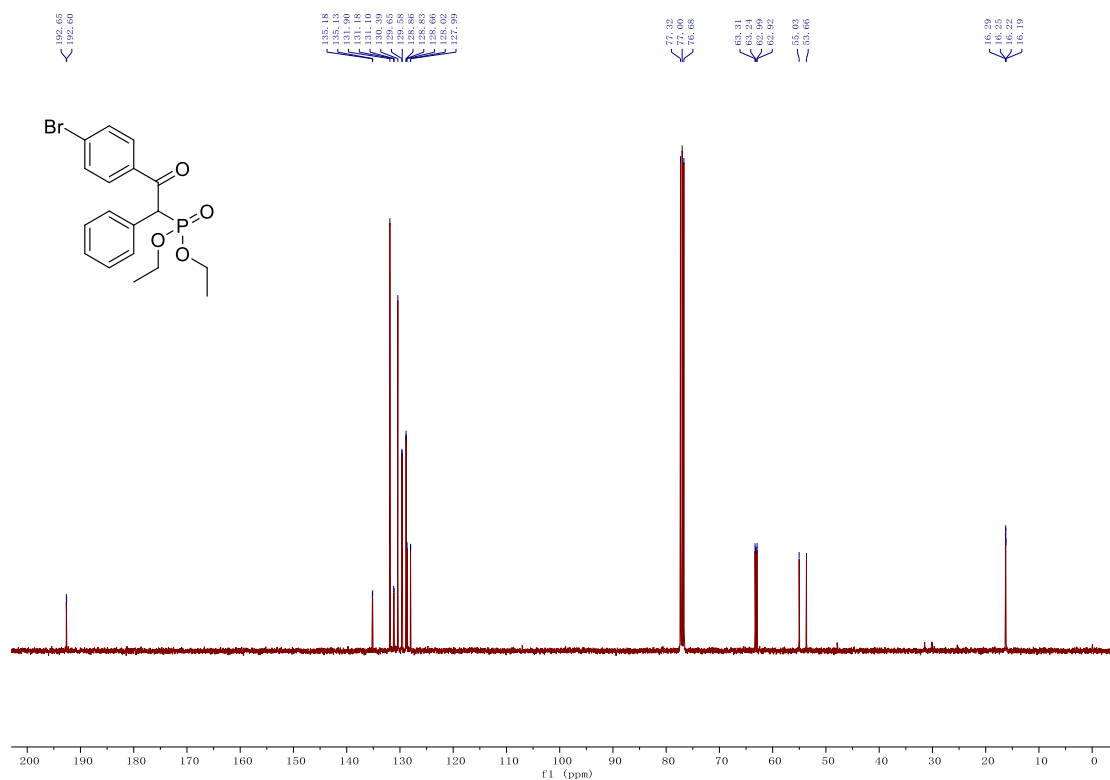

Figure S69.  $^{13}\text{C}$  NMR (101 MHz,  $\text{CDCl}_3$ ) spectrum of 3i

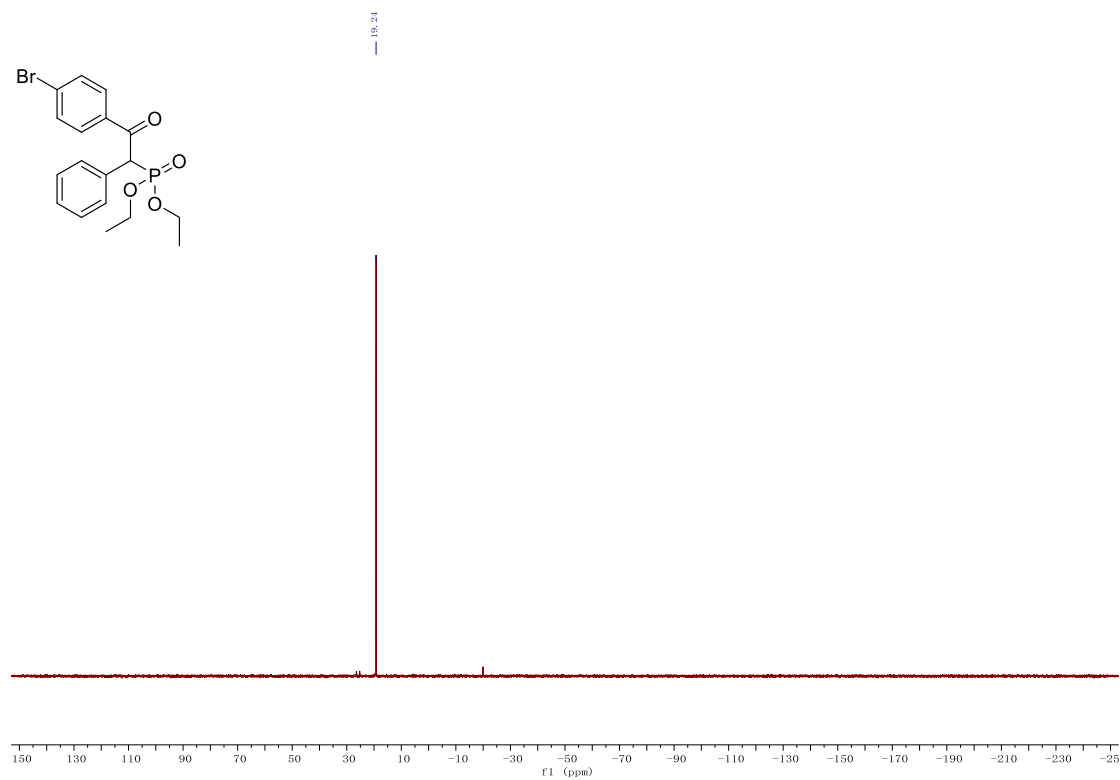

Figure S70.  $^{31}\text{P}$  NMR (162 MHz,  $\text{CDCl}_3$ ) spectrum of 3i

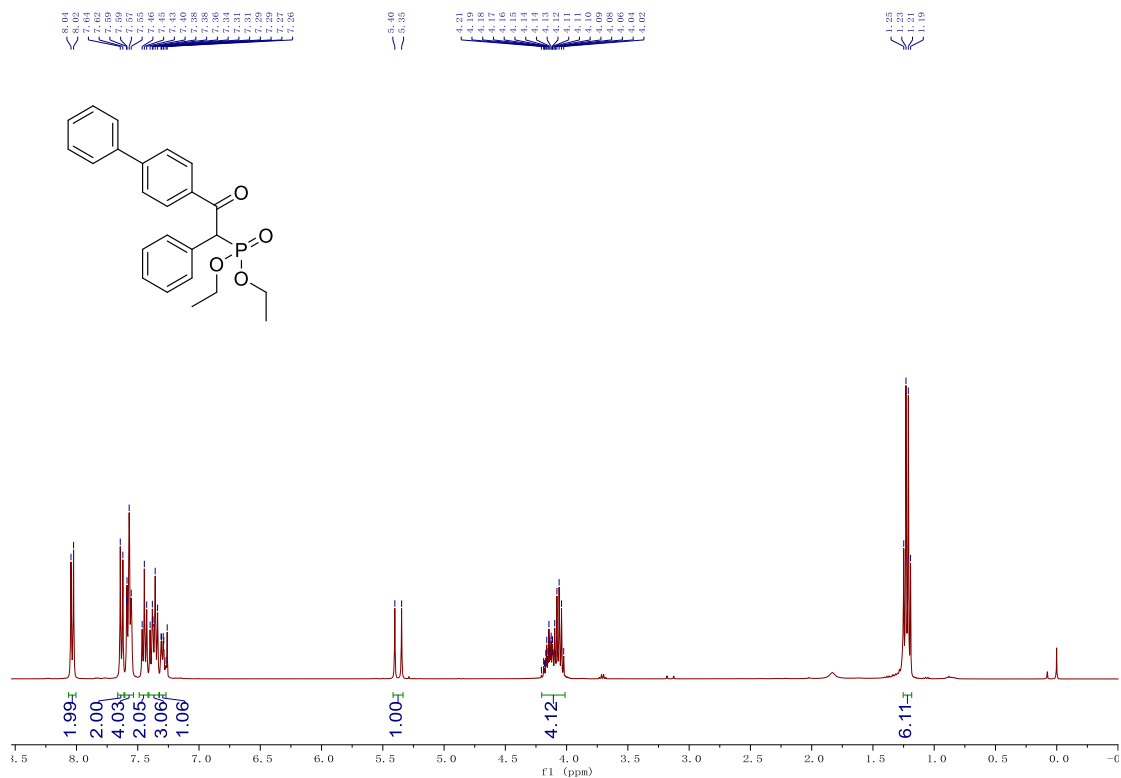

Figure S71. <sup>1</sup>H NMR (400 MHz, CDCl<sub>3</sub>) spectrum of 3j

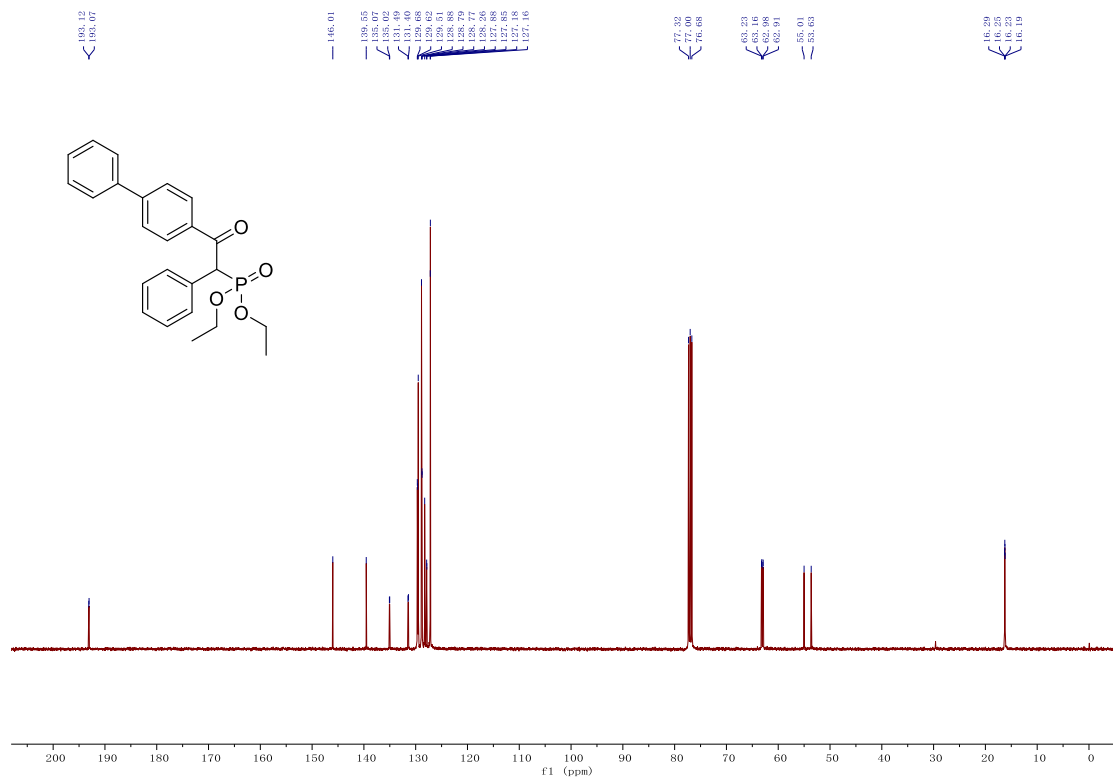

Figure S72. <sup>13</sup>C NMR (101 MHz, CDCl<sub>3</sub>) spectrum of 3j

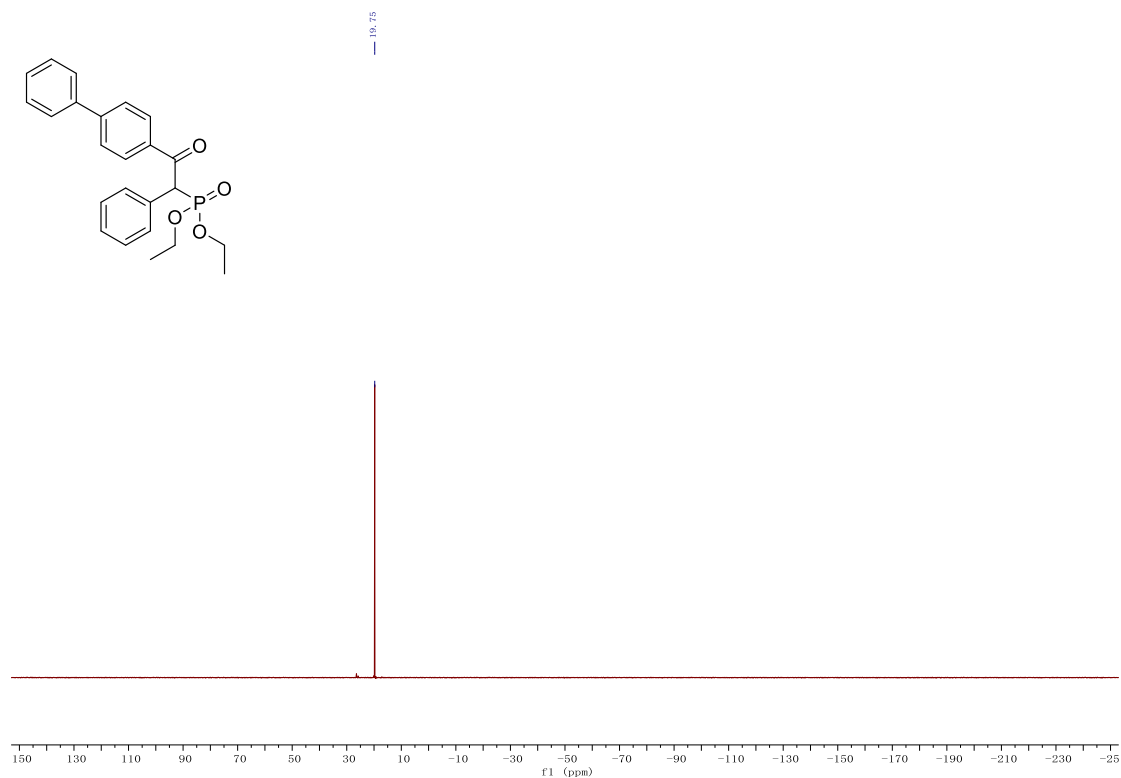

Figure S73.  $^{31}\text{P}$  NMR (162 MHz,  $\text{CDCl}_3$ ) spectrum of 3j

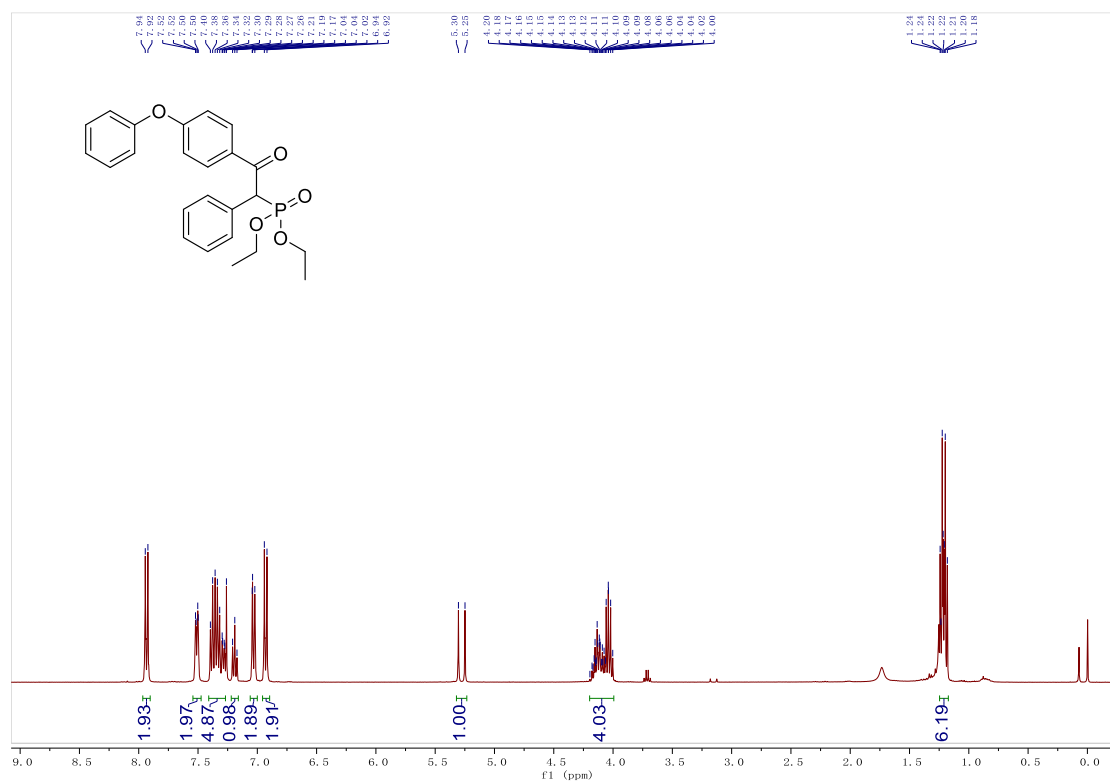

Figure S74.  $^1\text{H}$  NMR (400 MHz,  $\text{CDCl}_3$ ) spectrum of 3k

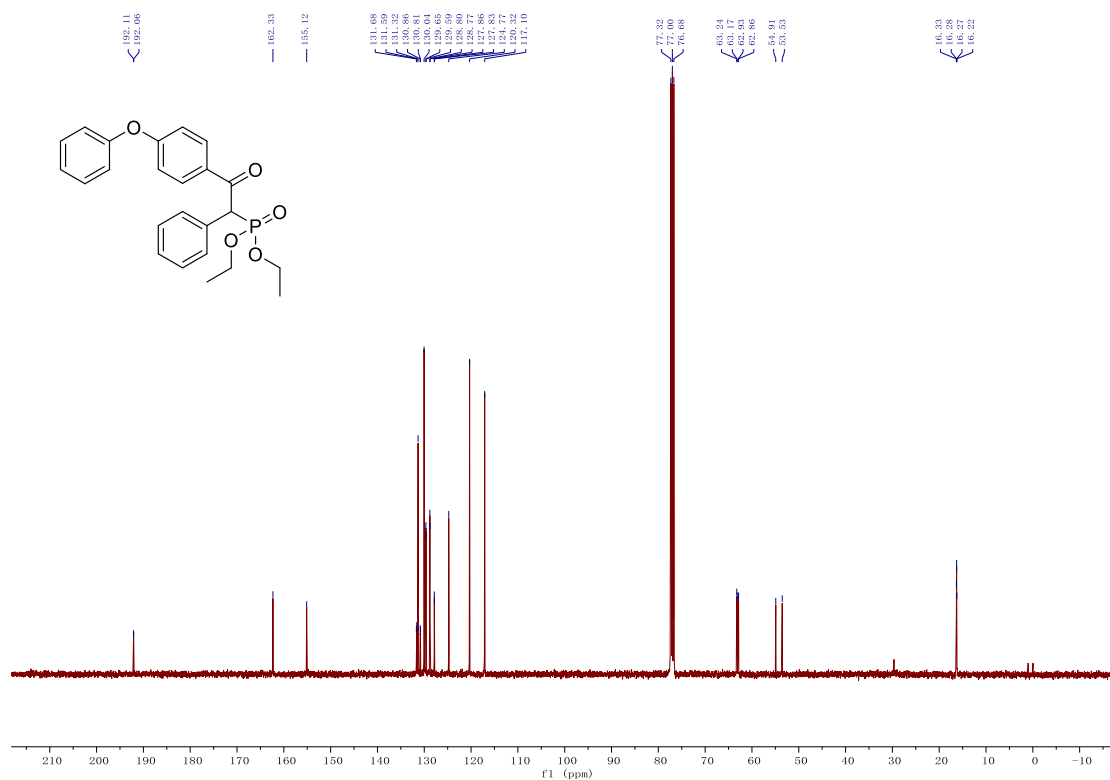

Figure S75. <sup>13</sup>C NMR (101 MHz, CDCl<sub>3</sub>) spectrum of 3k

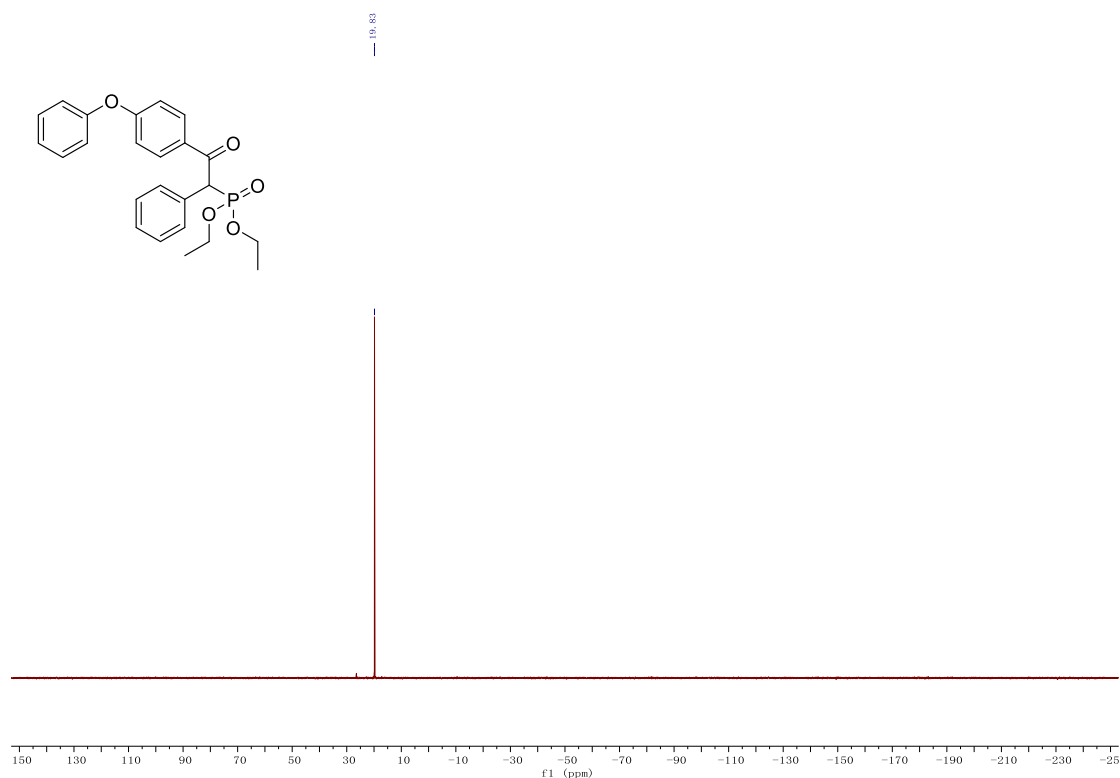

Figure S76. <sup>31</sup>P NMR (162 MHz, CDCl<sub>3</sub>) spectrum of 3k

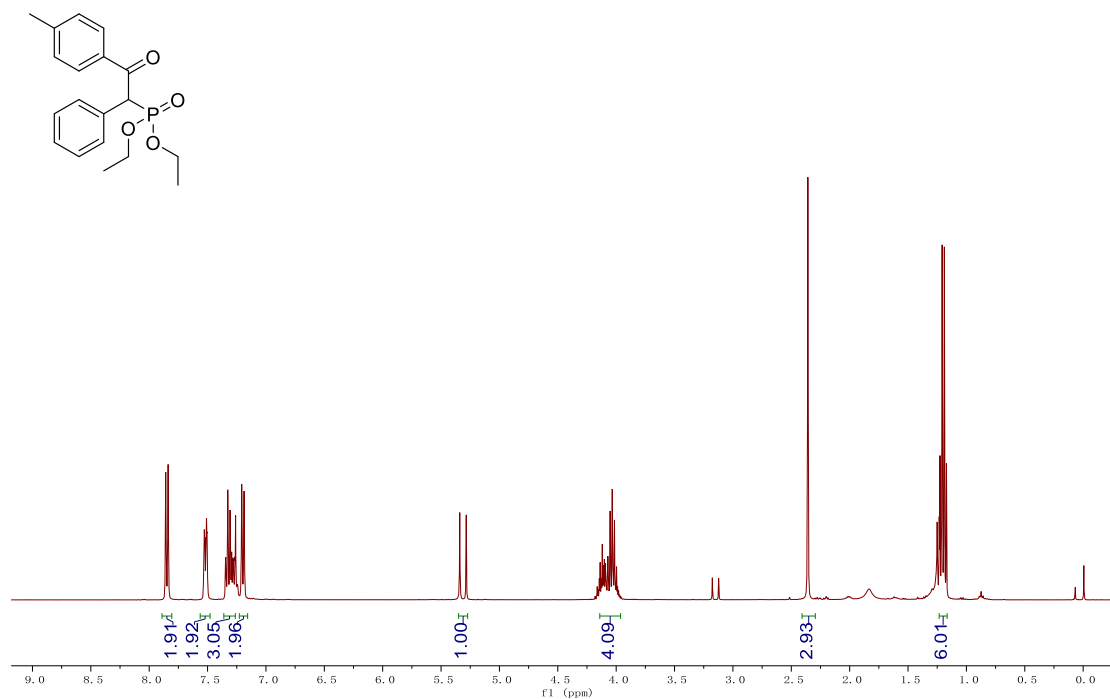

Figure S77. <sup>1</sup>H NMR (400 MHz, CDCl<sub>3</sub>) spectrum of 31

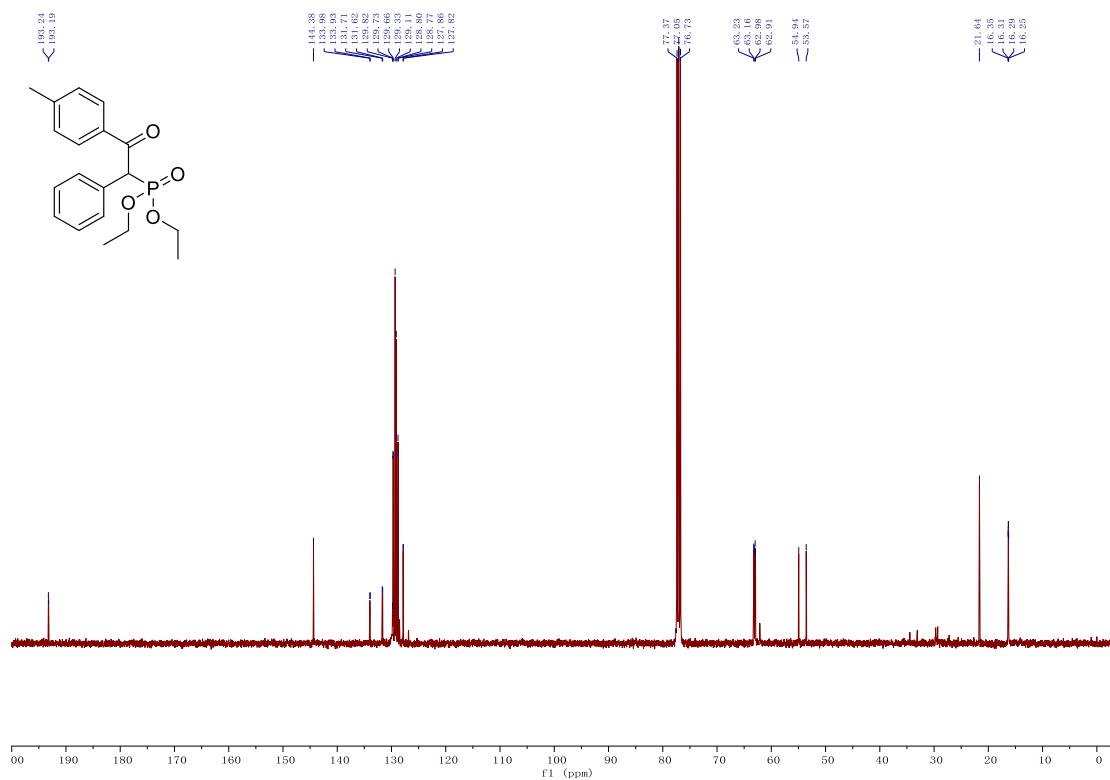

Figure S78. <sup>13</sup>C NMR (101 MHz, CDCl<sub>3</sub>) spectrum of 31

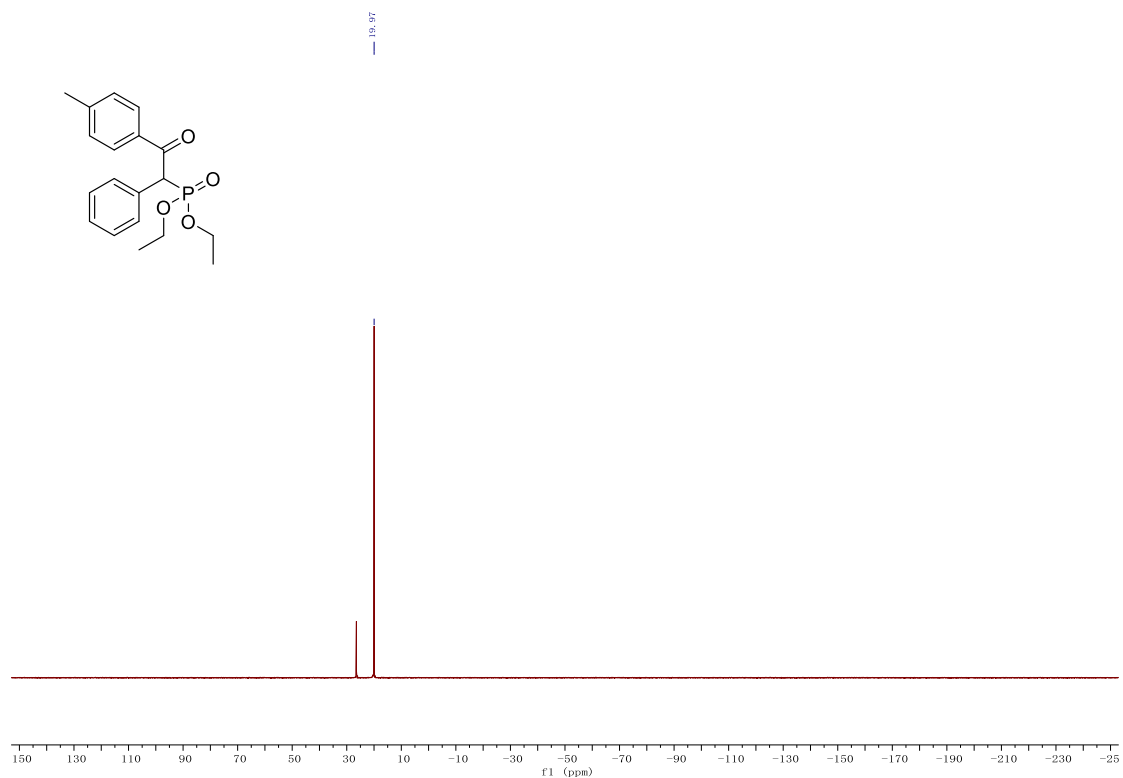

Figure S79.  $^{31}\text{P}$  NMR (162 MHz,  $\text{CDCl}_3$ ) spectrum of 31

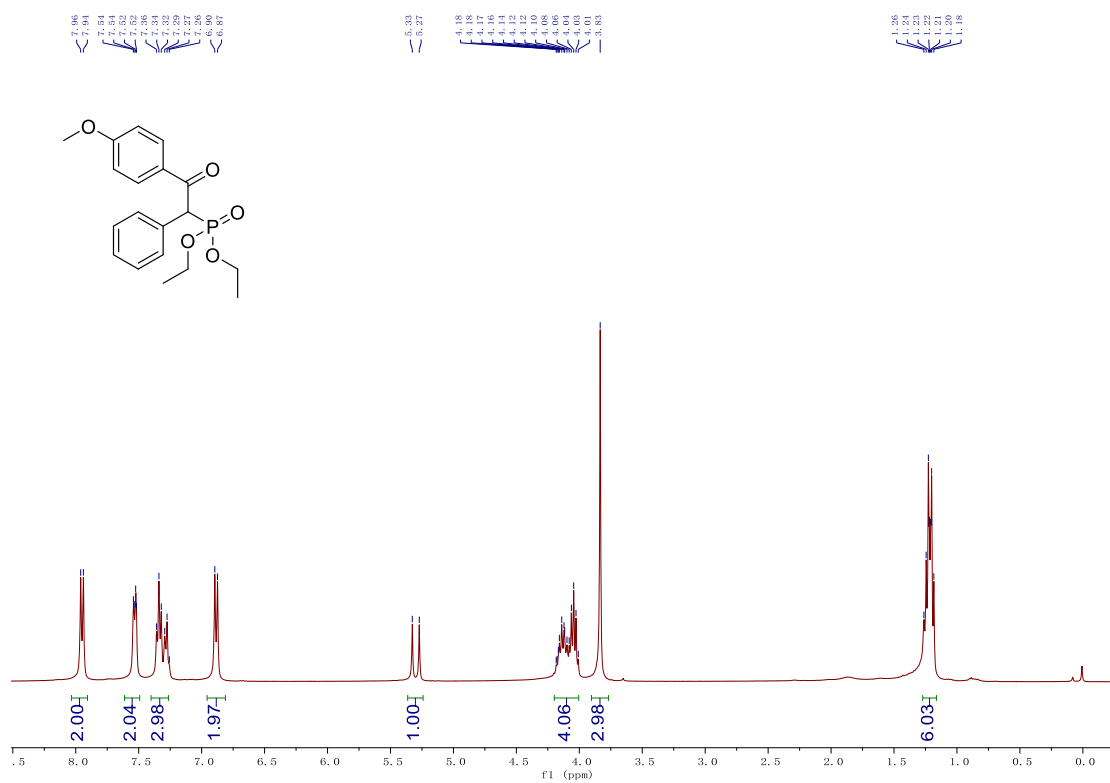

Figure S80.  $^1\text{H}$  NMR (400 MHz,  $\text{CDCl}_3$ ) spectrum of 3m

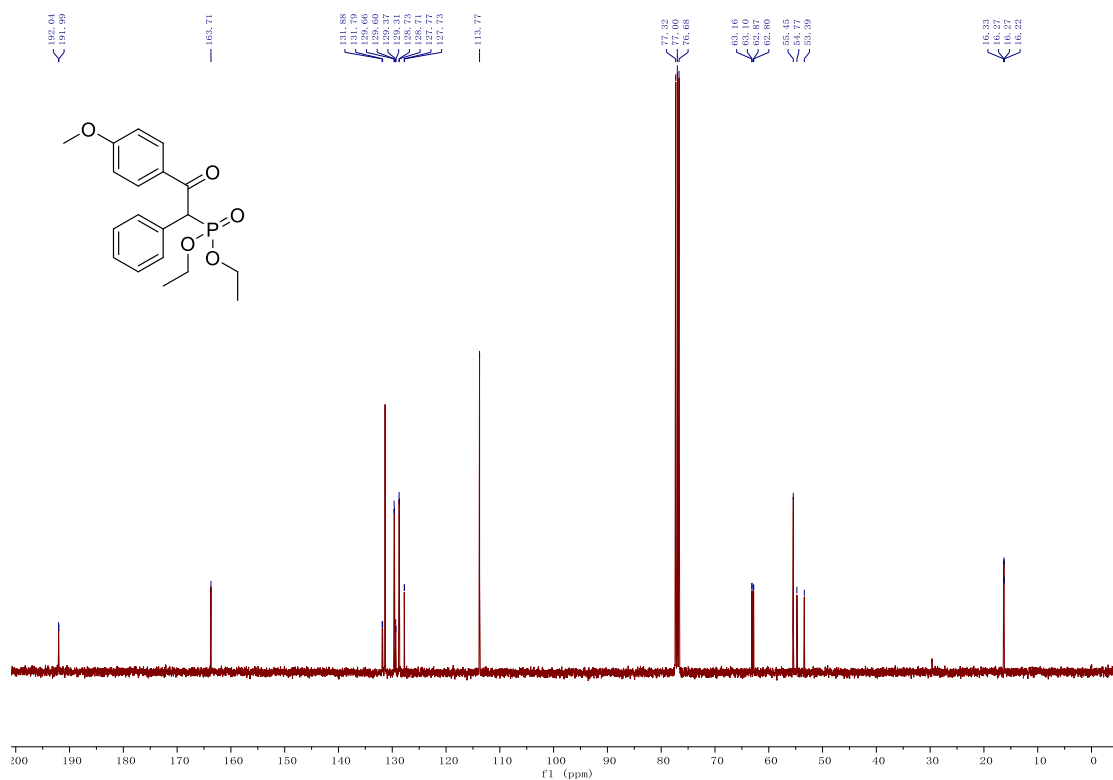

Figure S81. <sup>13</sup>C NMR (101 MHz, CDCl<sub>3</sub>) spectrum of 3m

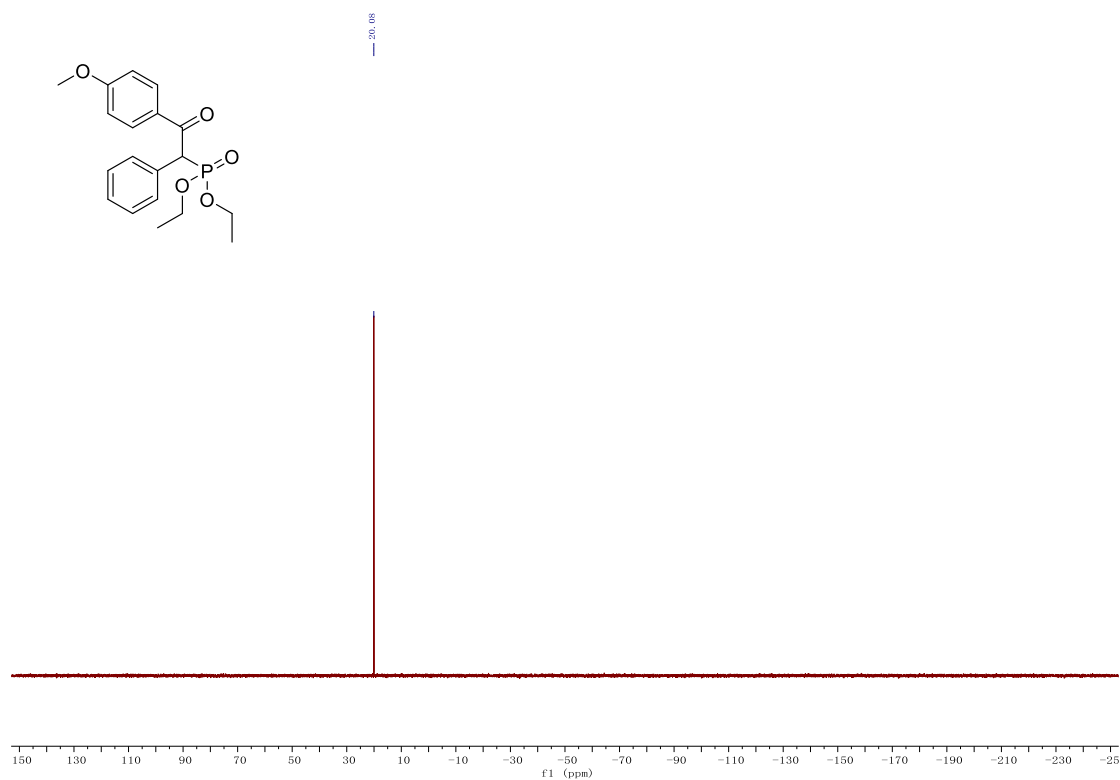

Figure S82. <sup>31</sup>P NMR (162 MHz, CDCl<sub>3</sub>) spectrum of 3m

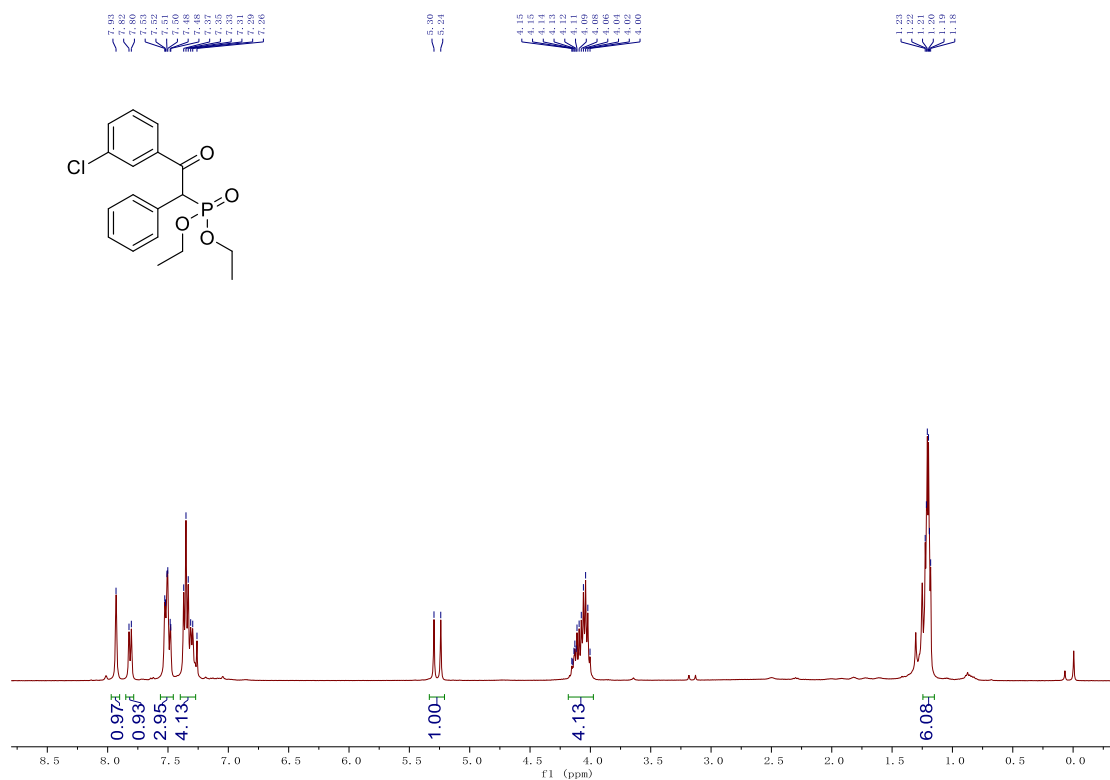

Figure S83. <sup>1</sup>H NMR (400 MHz, CDCl<sub>3</sub>) spectrum of 3n

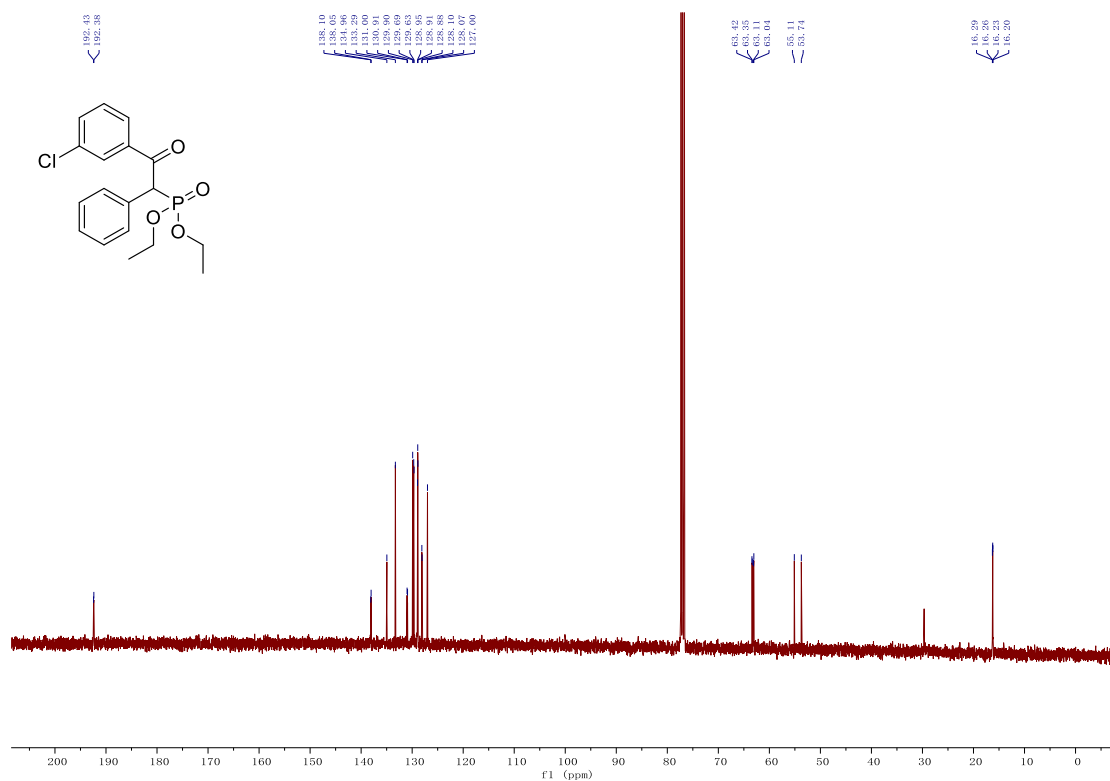

Figure S84. <sup>13</sup>C NMR (101 MHz, CDCl<sub>3</sub>) spectrum of 3n

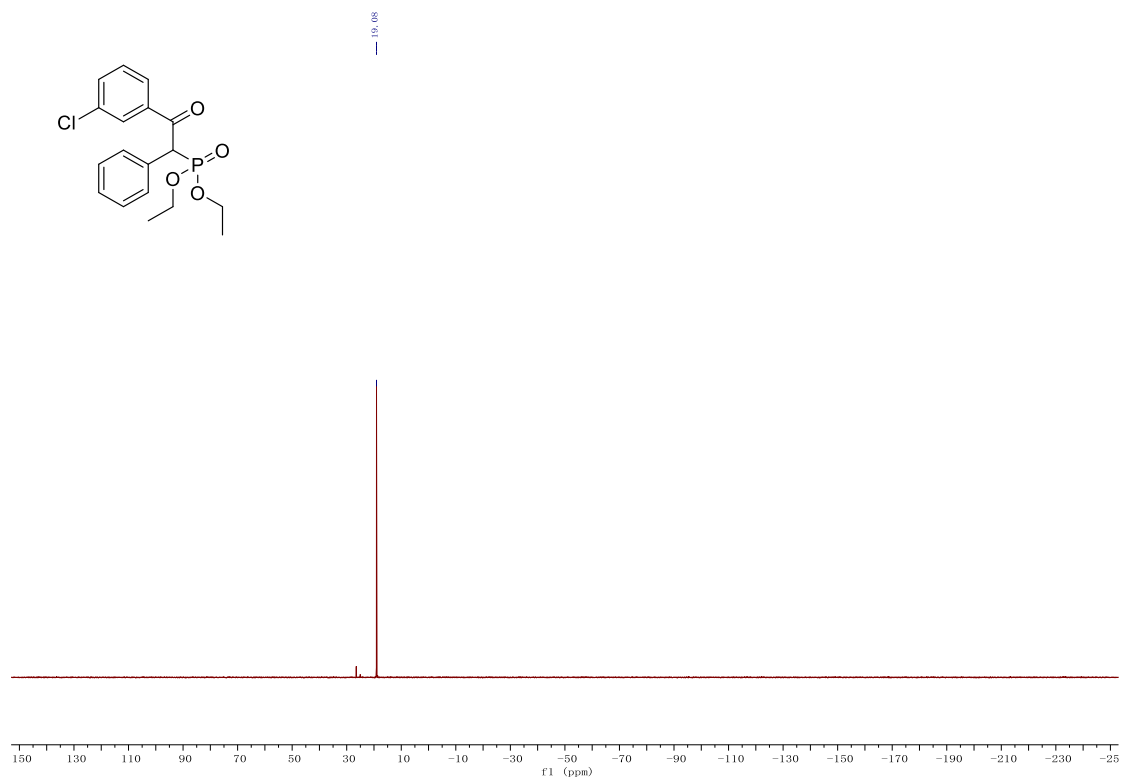

Figure S85.  $^{31}\text{P}$  NMR (162 MHz,  $\text{CDCl}_3$ ) spectrum of 3n

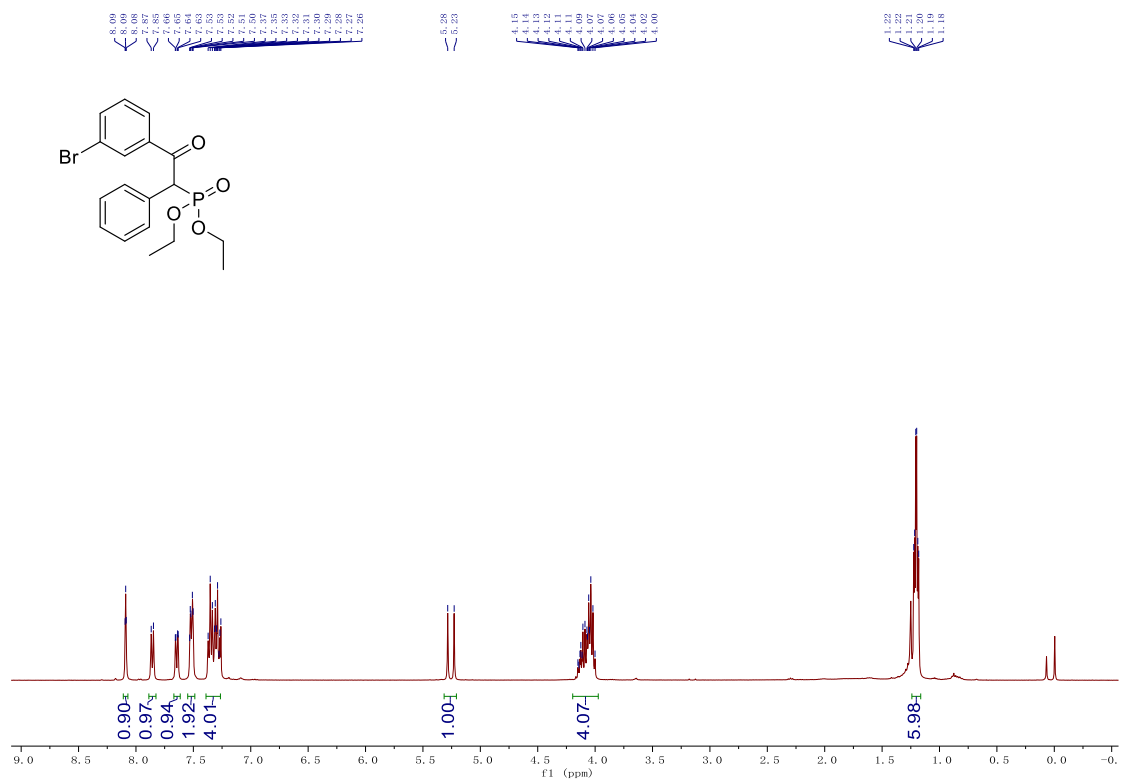

Figure S86.  $^1\text{H}$  NMR (400 MHz,  $\text{CDCl}_3$ ) spectrum of 3o

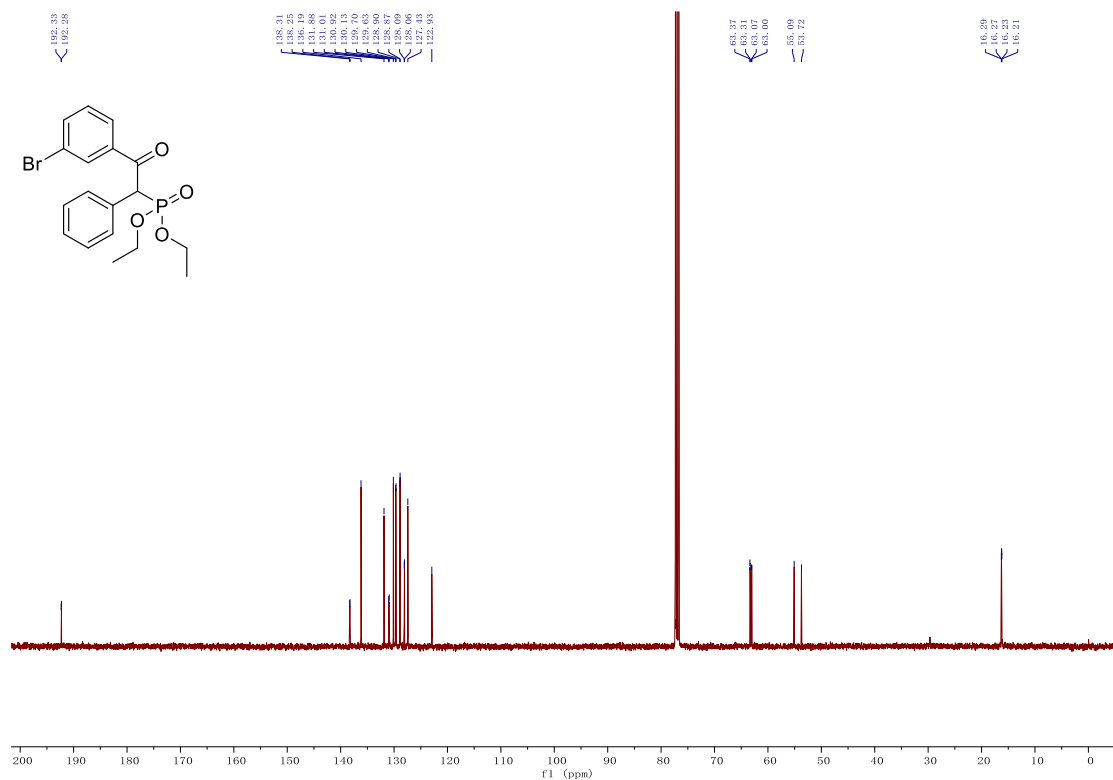

Figure S87. <sup>13</sup>C NMR (101 MHz, CDCl<sub>3</sub>) spectrum of 30

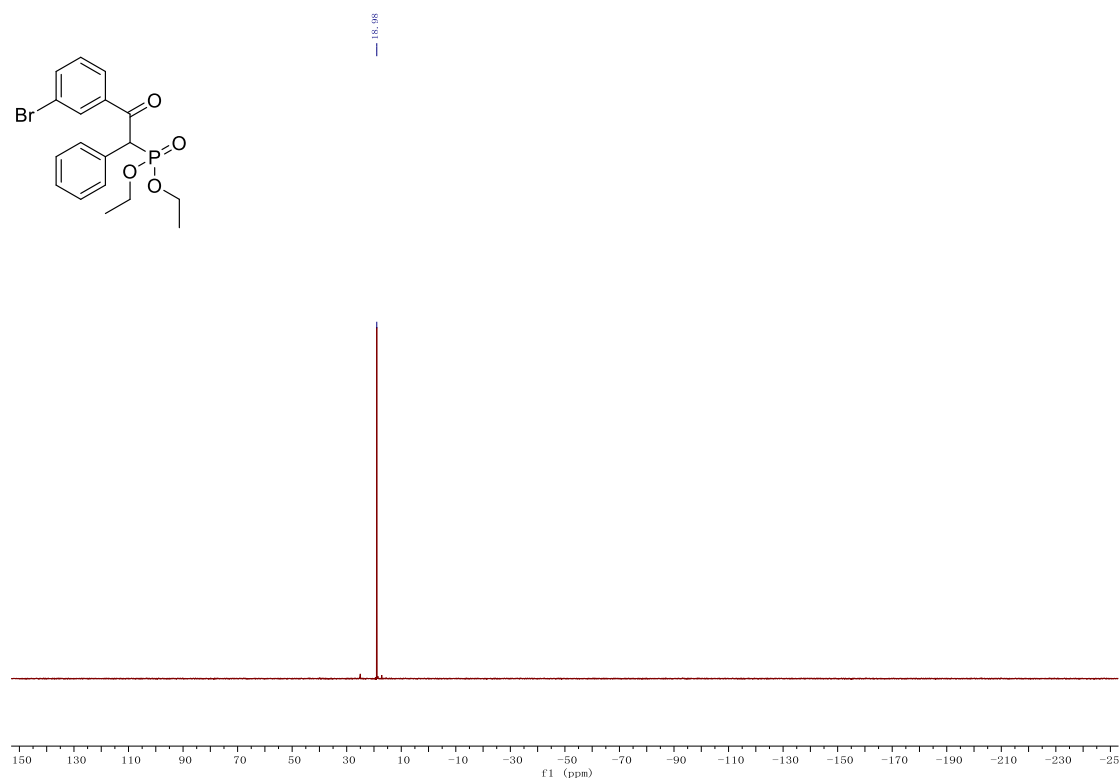

Figure S88. <sup>31</sup>P NMR (162 MHz, CDCl<sub>3</sub>) spectrum of 30

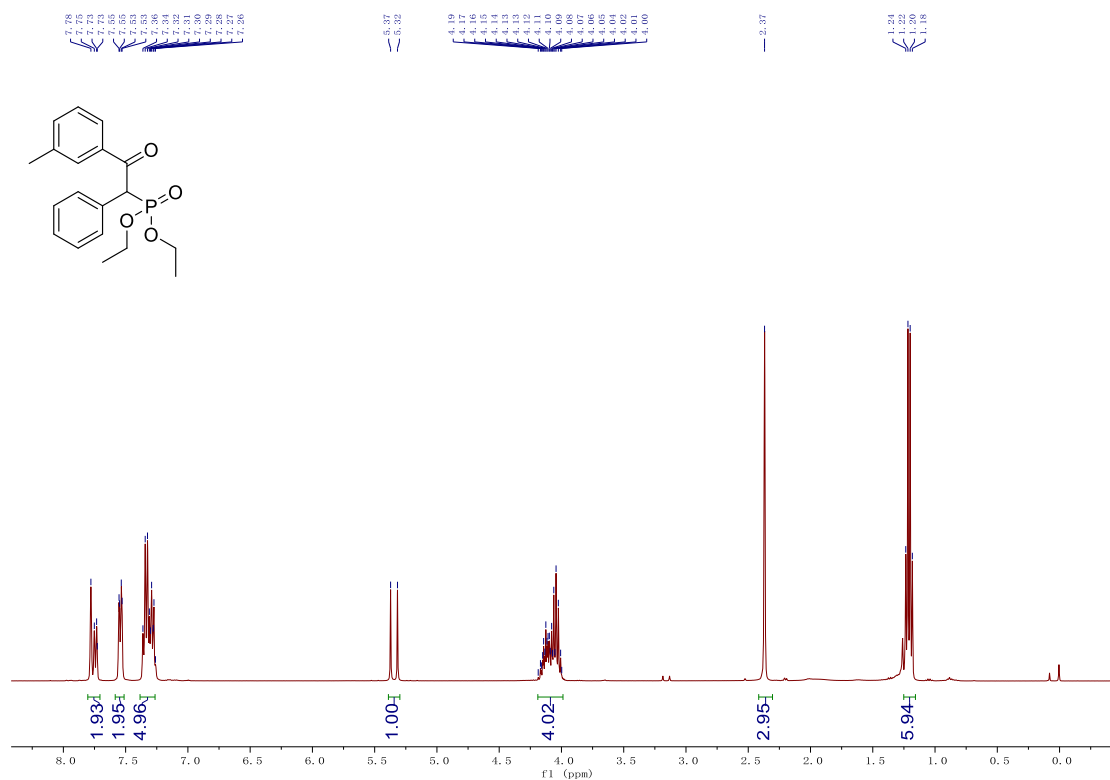

Figure S89. <sup>1</sup>H NMR (400 MHz, CDCl<sub>3</sub>) spectrum of 3p

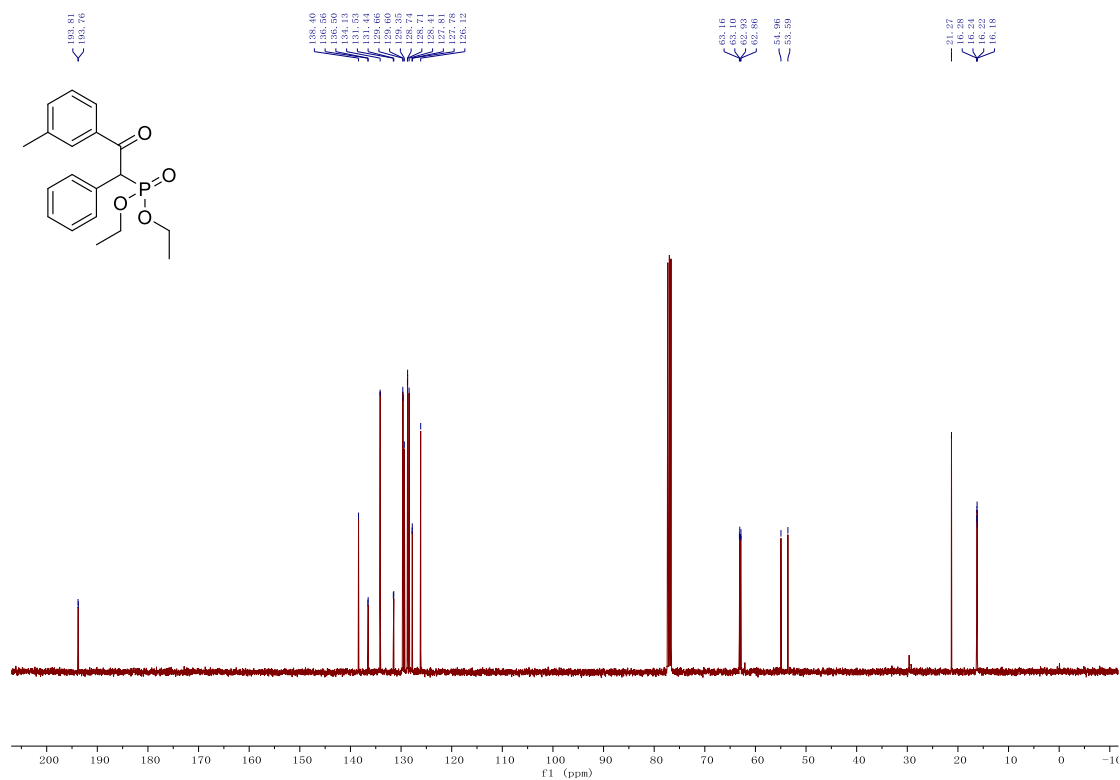

Figure S90. <sup>13</sup>C NMR (101 MHz, CDCl<sub>3</sub>) spectrum of 3p

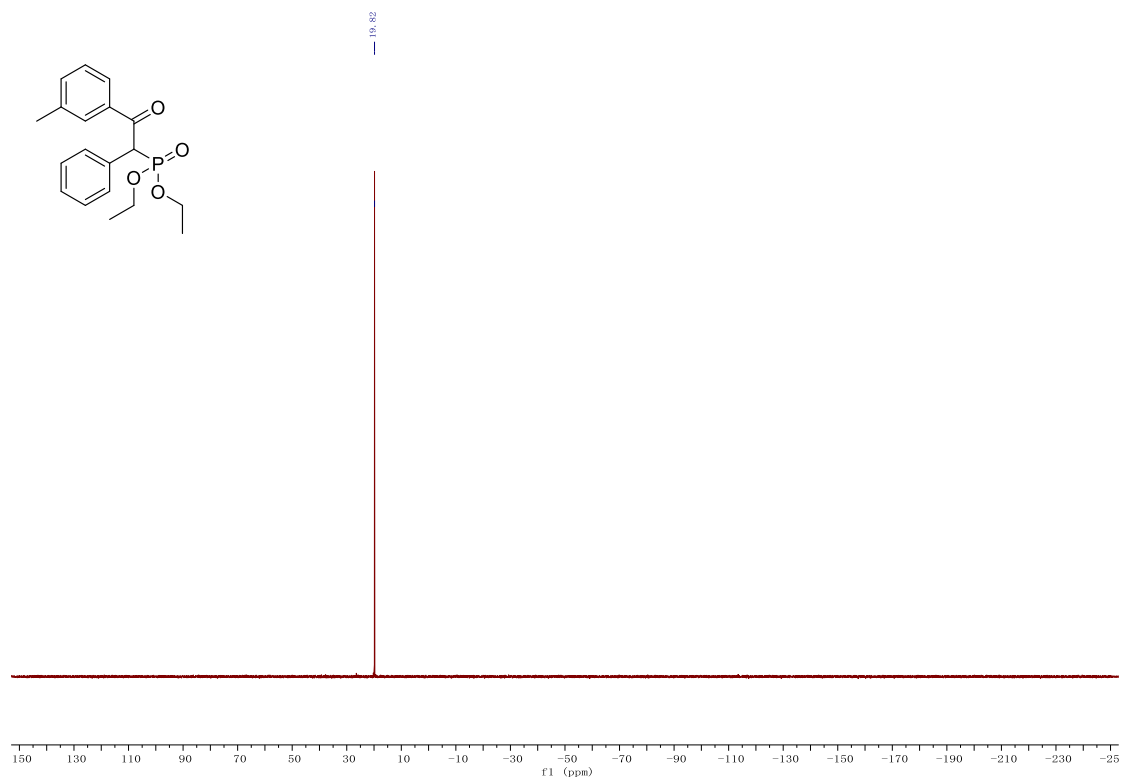

Figure S91.  $^{31}\text{P}$  NMR (162 MHz,  $\text{CDCl}_3$ ) spectrum of 3p

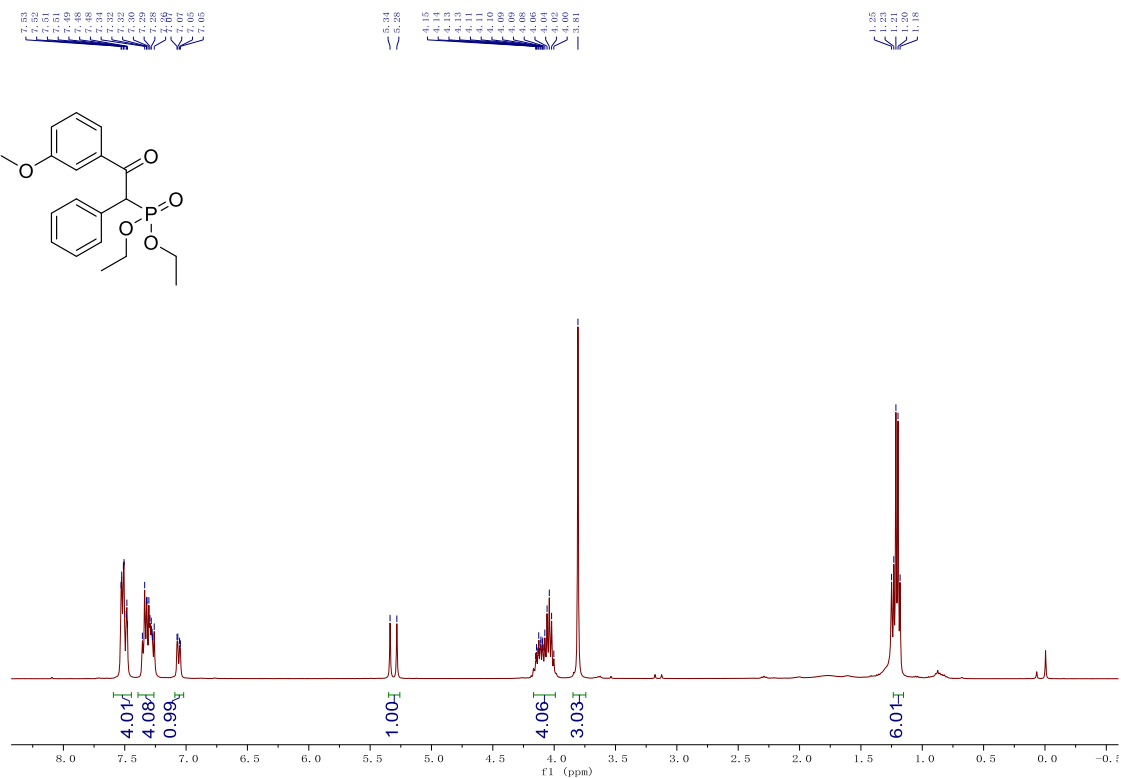

Figure S92.  $^1\text{H}$  NMR (400 MHz,  $\text{CDCl}_3$ ) spectrum of 3q



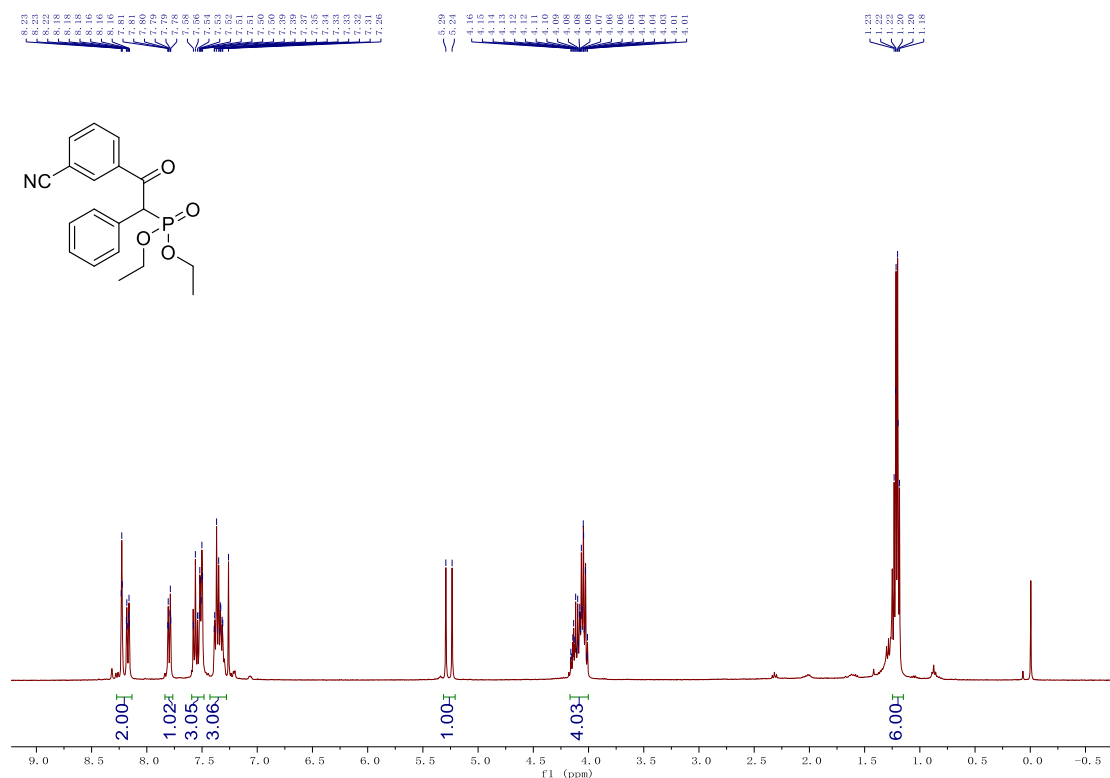

Figure S95. <sup>1</sup>H NMR (400 MHz, CDCl<sub>3</sub>) spectrum of 3r

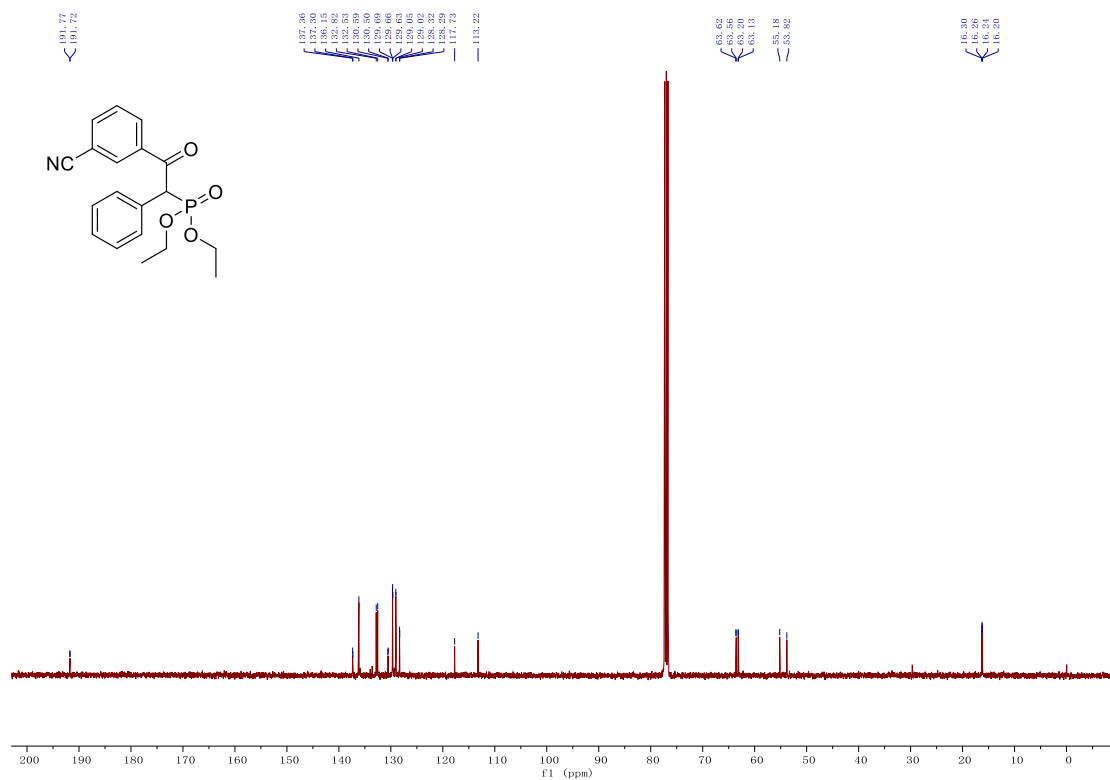

Figure S96. <sup>13</sup>C NMR (101 MHz, CDCl<sub>3</sub>) spectrum of 3r

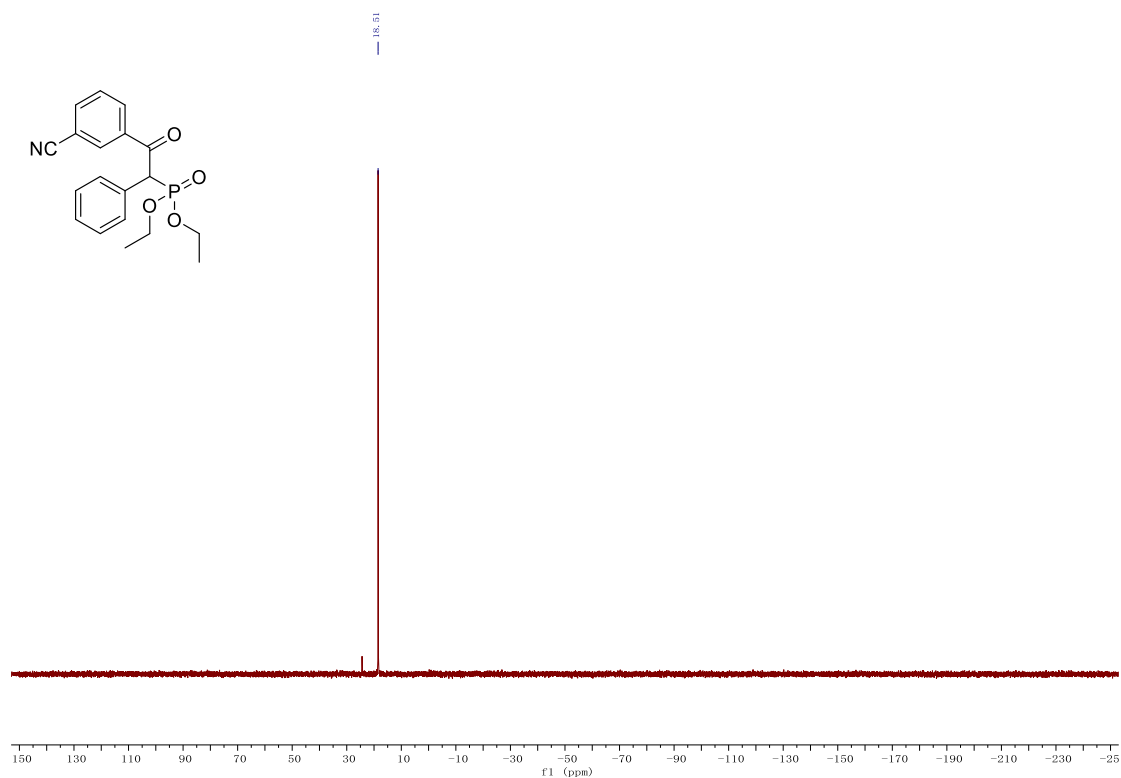

Figure S97.  $^{31}\text{P}$  NMR (162 MHz,  $\text{CDCl}_3$ ) spectrum of **3r**

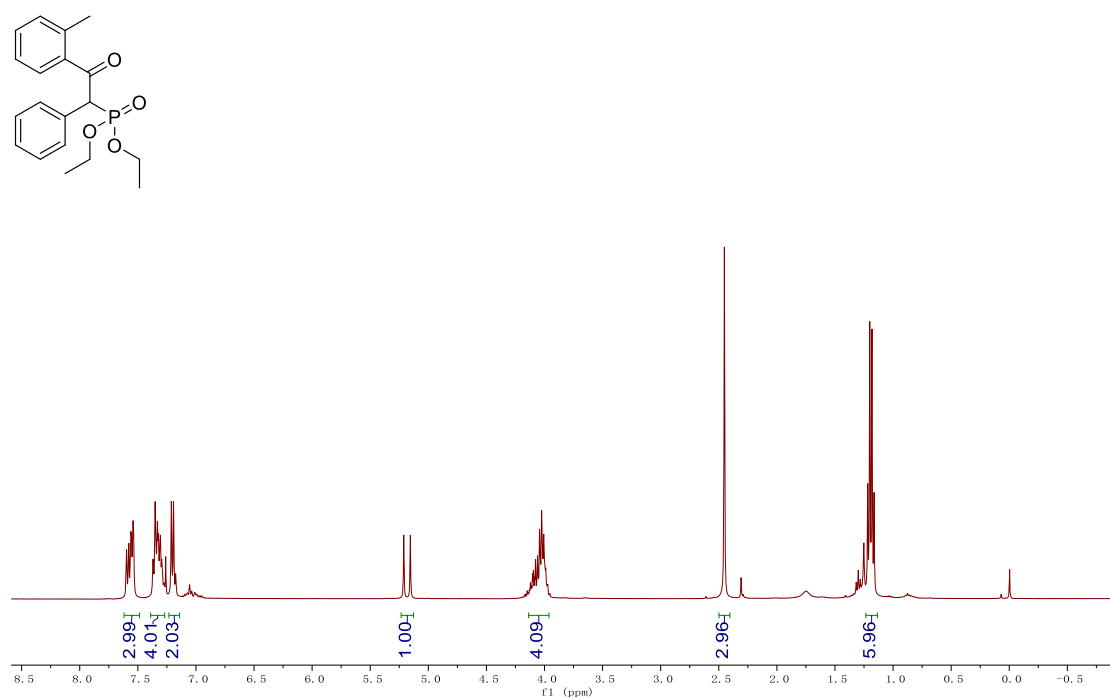

Figure S98.  $^1\text{H}$  NMR (400 MHz,  $\text{CDCl}_3$ ) spectrum of **3s**



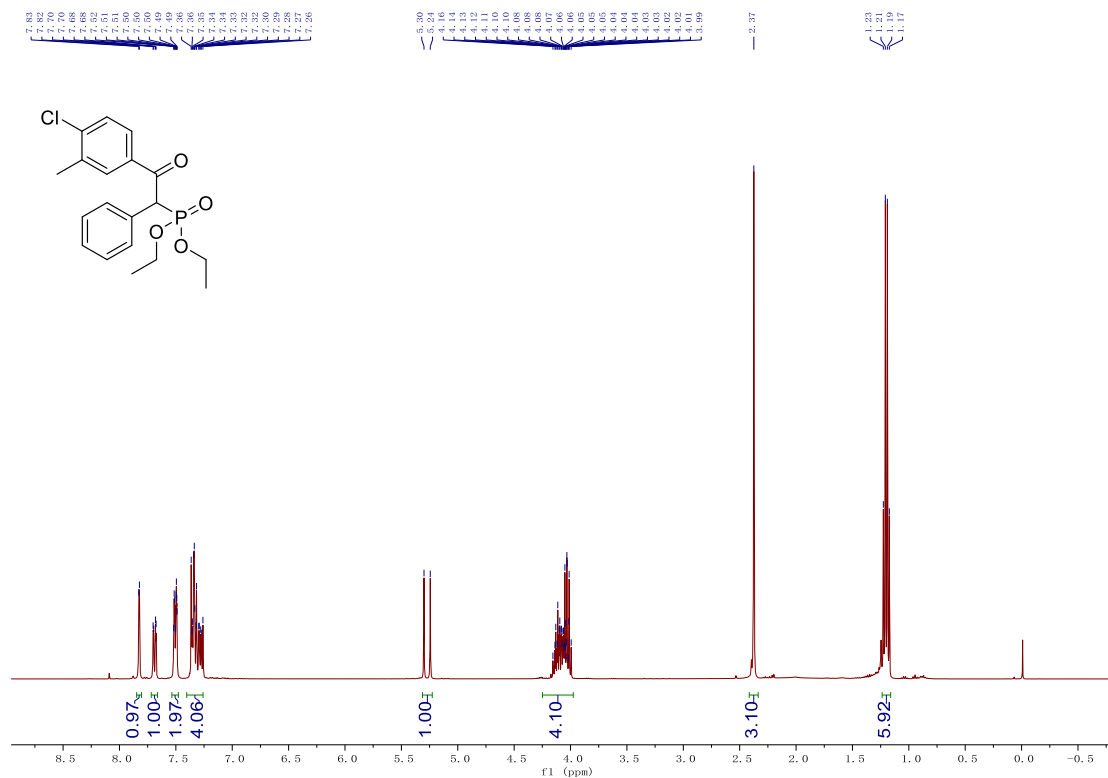

Figure S101. <sup>1</sup>H NMR (400 MHz, CDCl<sub>3</sub>) spectrum of 3t

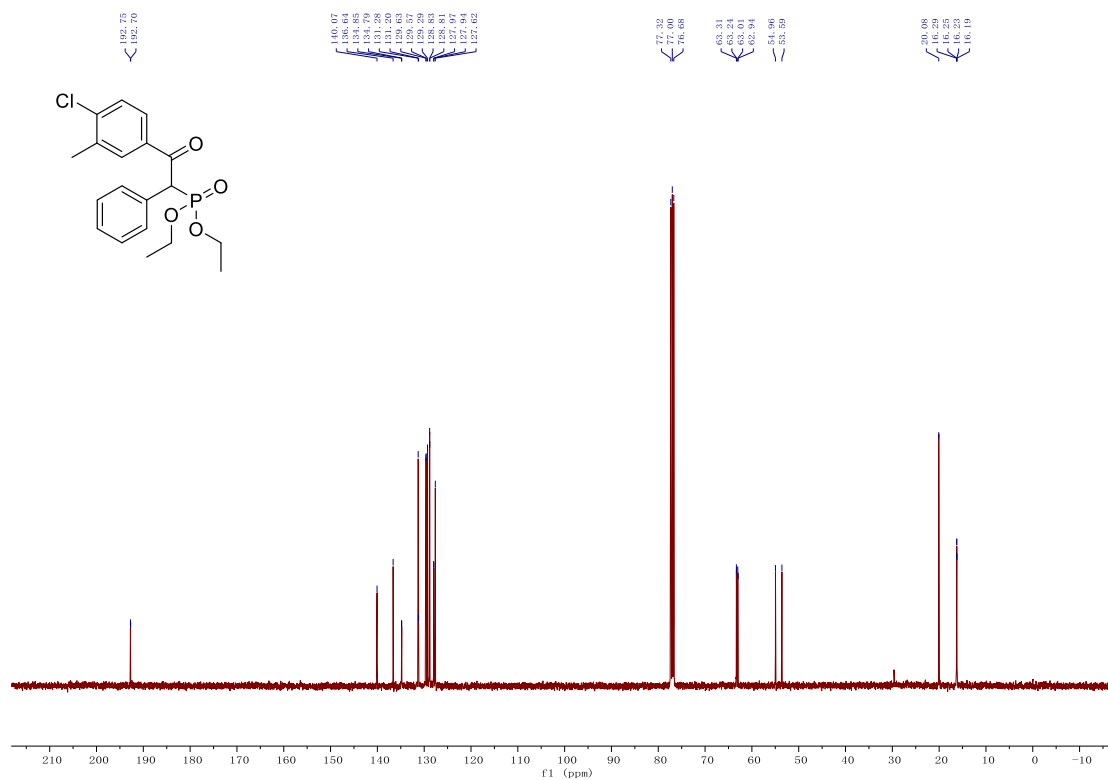

Figure S102. <sup>13</sup>C NMR (101 MHz, CDCl<sub>3</sub>) spectrum of 3t

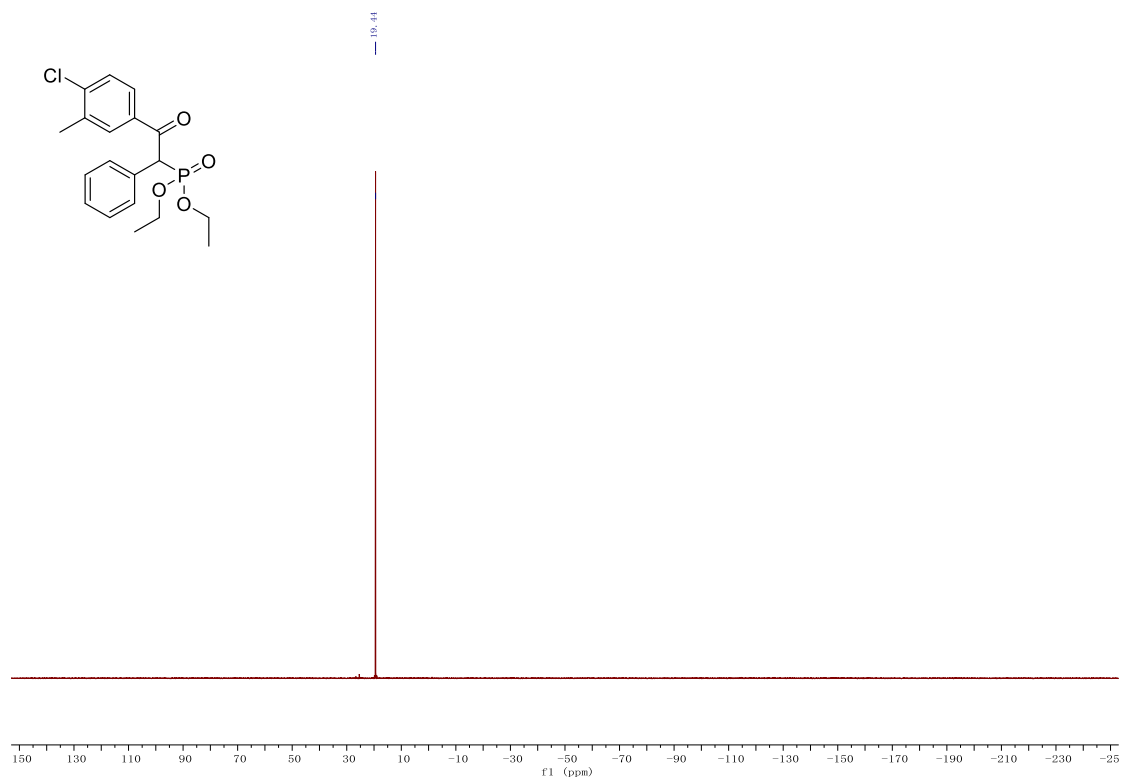

Figure S103.  $^{31}\text{P}$  NMR (162 MHz,  $\text{CDCl}_3$ ) spectrum of **3t**

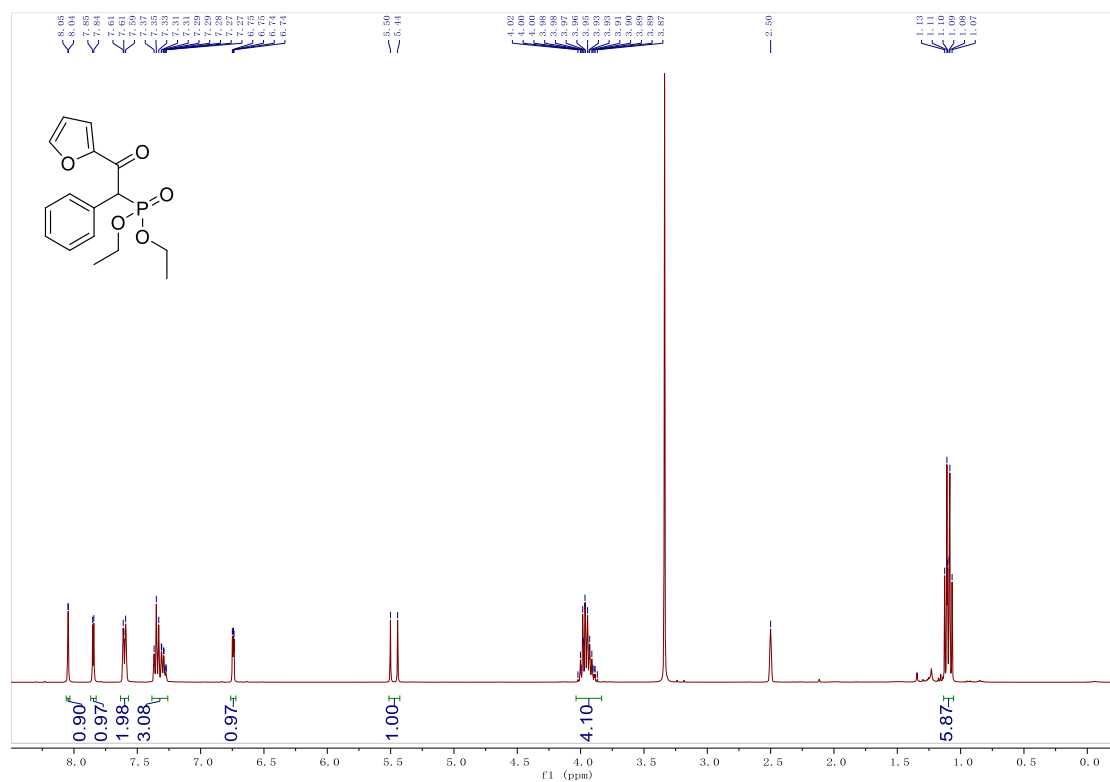

Figure S104.  $^1\text{H}$  NMR (400 MHz, DMSO) spectrum of **3u**

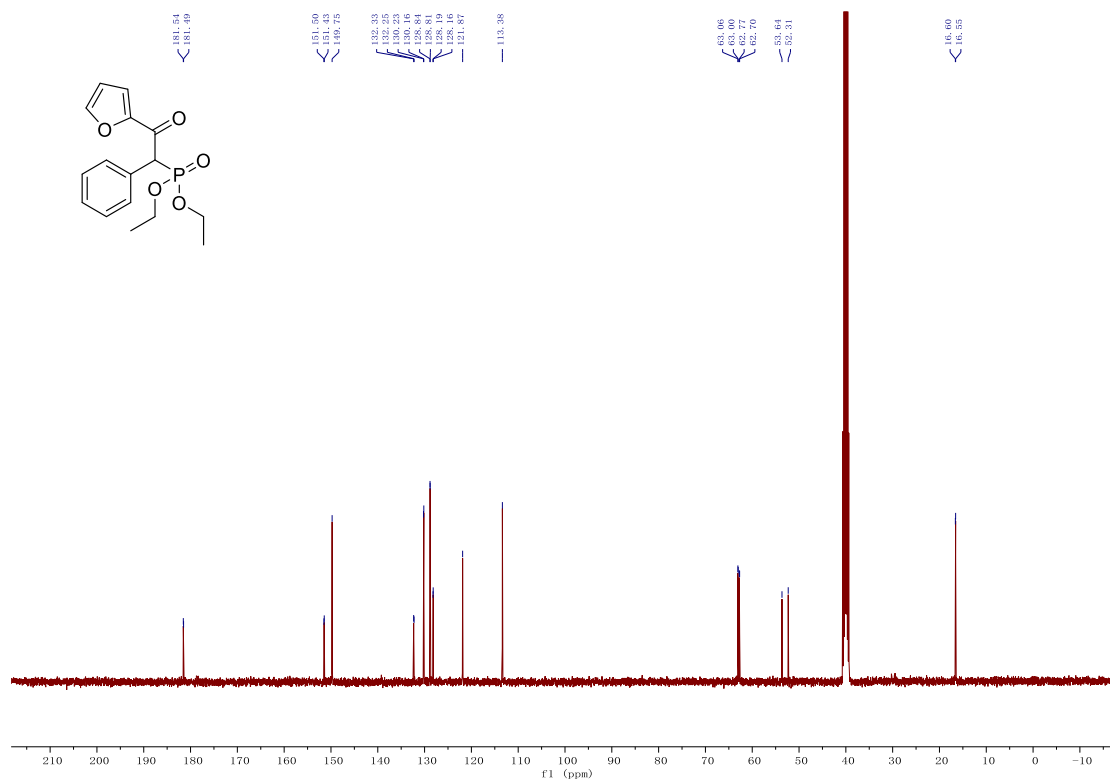

Figure S105. <sup>13</sup>C NMR (101 MHz, DMSO) spectrum of 3u

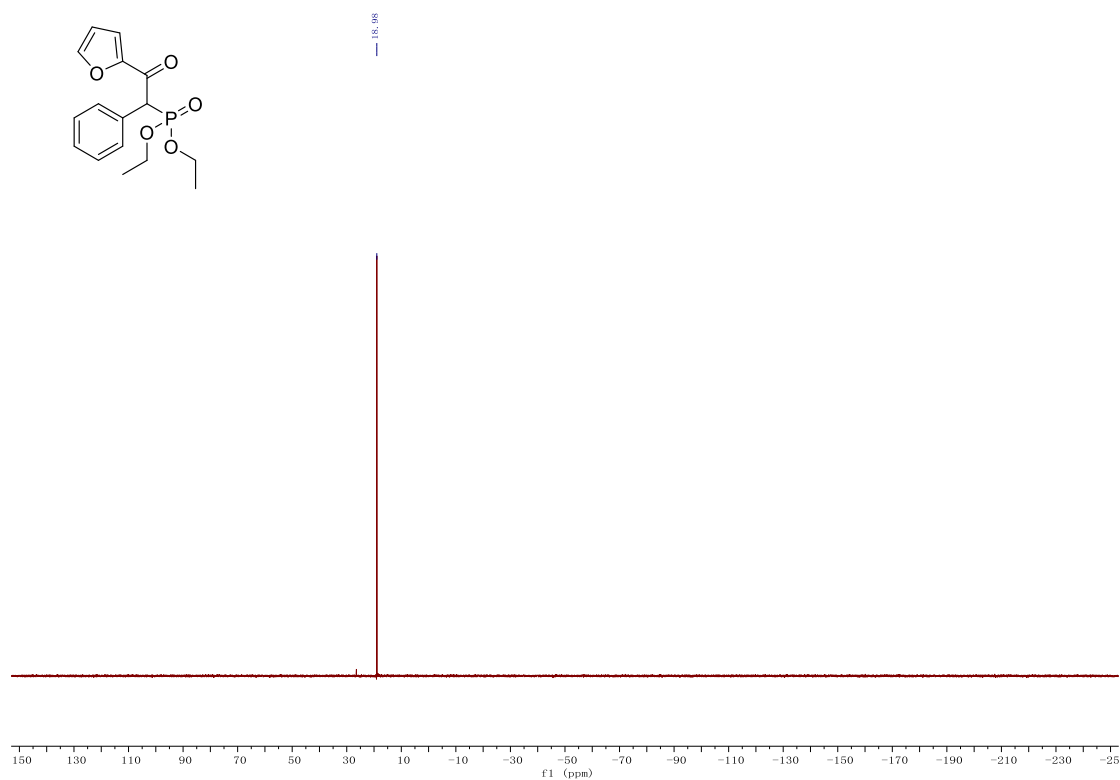

Figure S106. <sup>31</sup>P NMR (162 MHz, CDCl<sub>3</sub>) spectrum of 3u

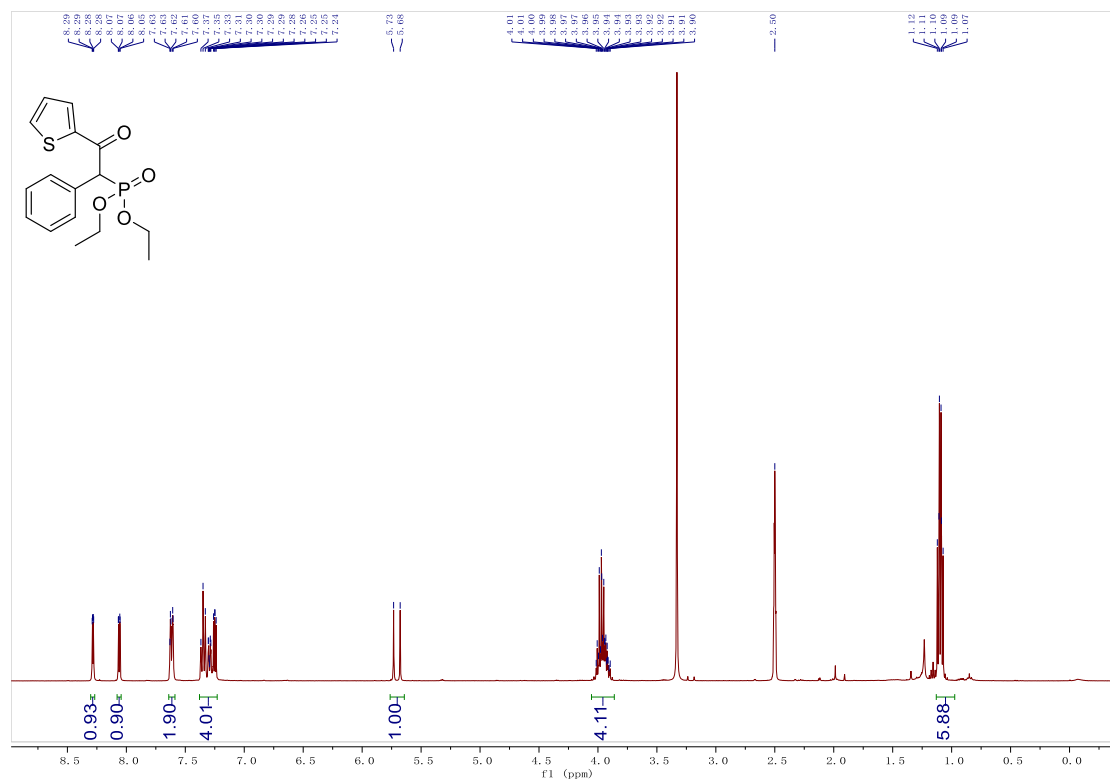

Figure S107. <sup>1</sup>H NMR (400 MHz, DMSO) spectrum of 3v

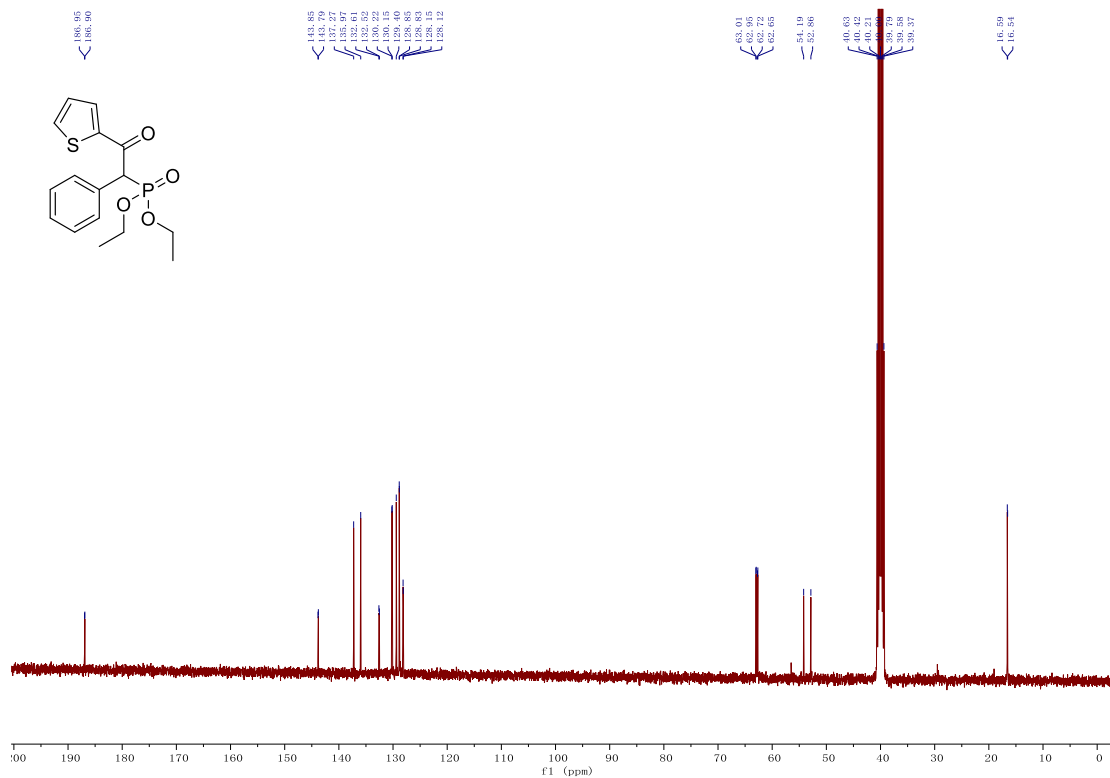

Figure S108. <sup>13</sup>C NMR (101 MHz, DMSO) spectrum of 3v

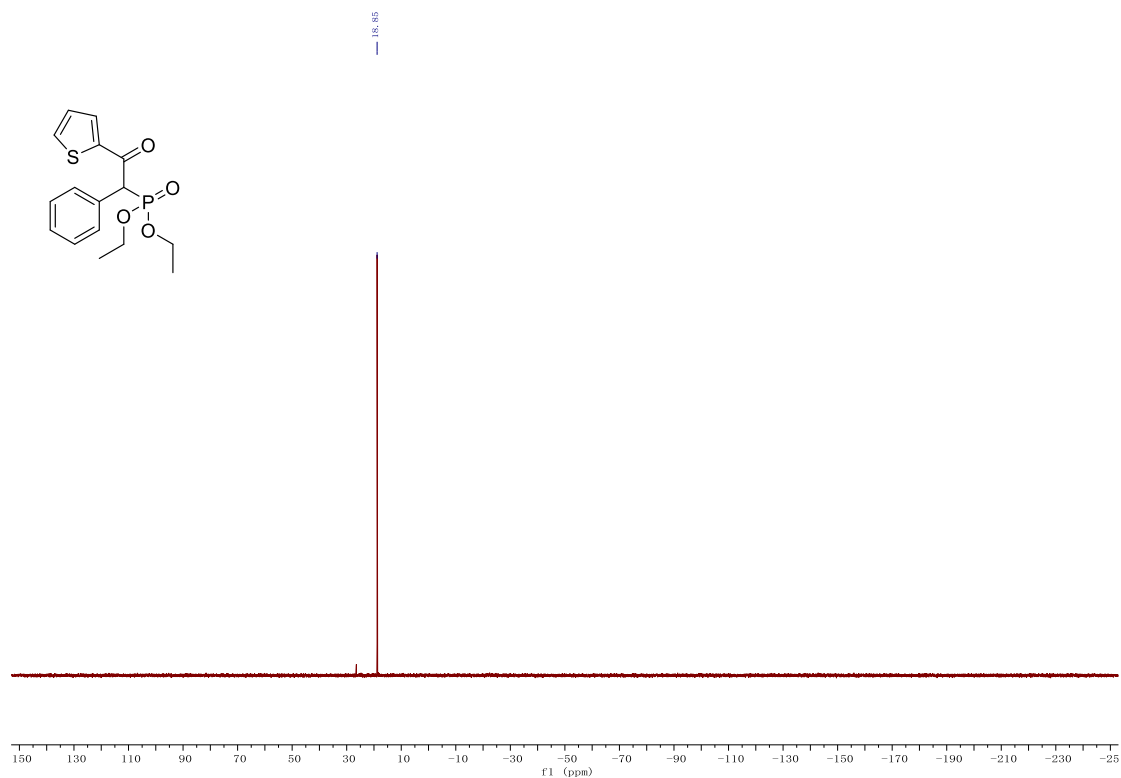

Figure S109.  $^{31}\text{P}$  NMR (162 MHz,  $\text{CDCl}_3$ ) spectrum of 3v

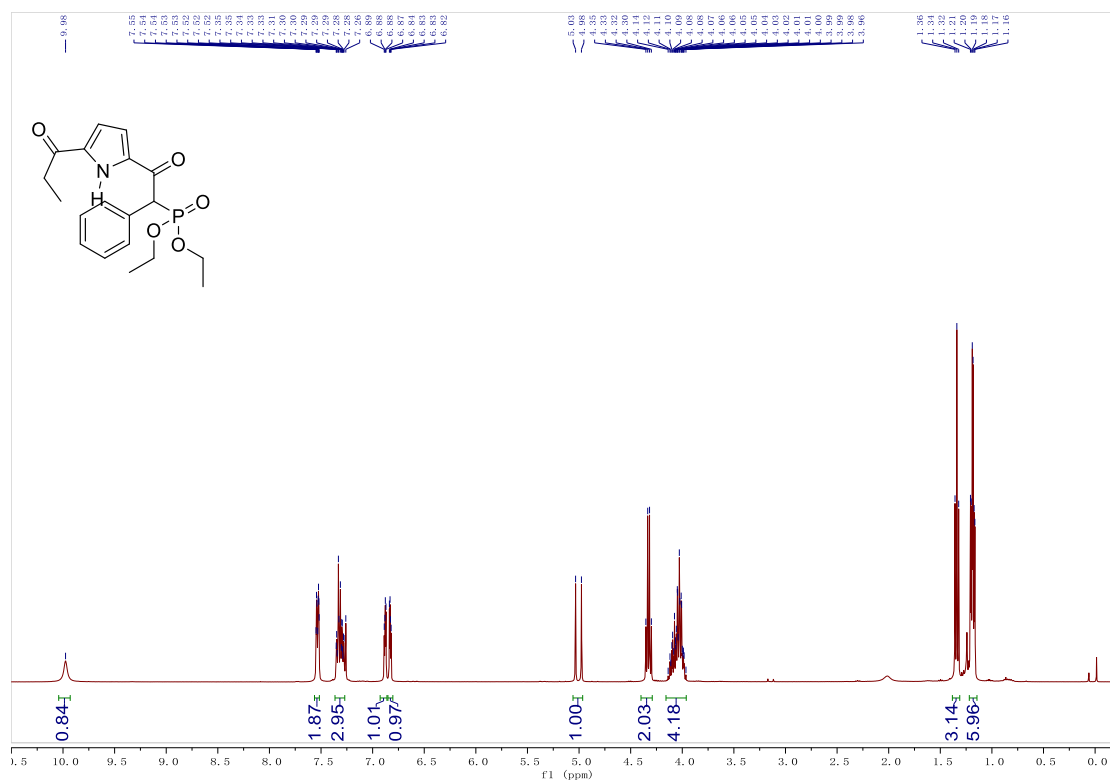

Figure S110.  $^1\text{H}$  NMR (400 MHz,  $\text{CDCl}_3$ ) spectrum of 3w

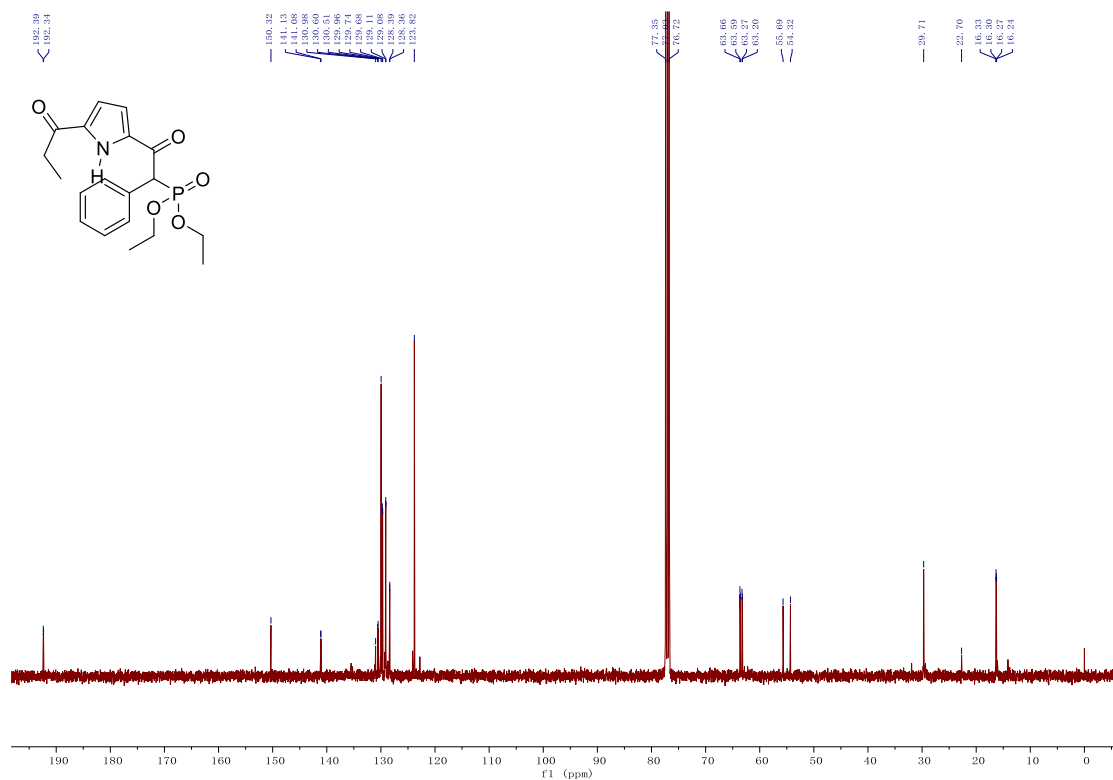

Figure S11. <sup>13</sup>C NMR (101 MHz, CDCl<sub>3</sub>) spectrum of 3w

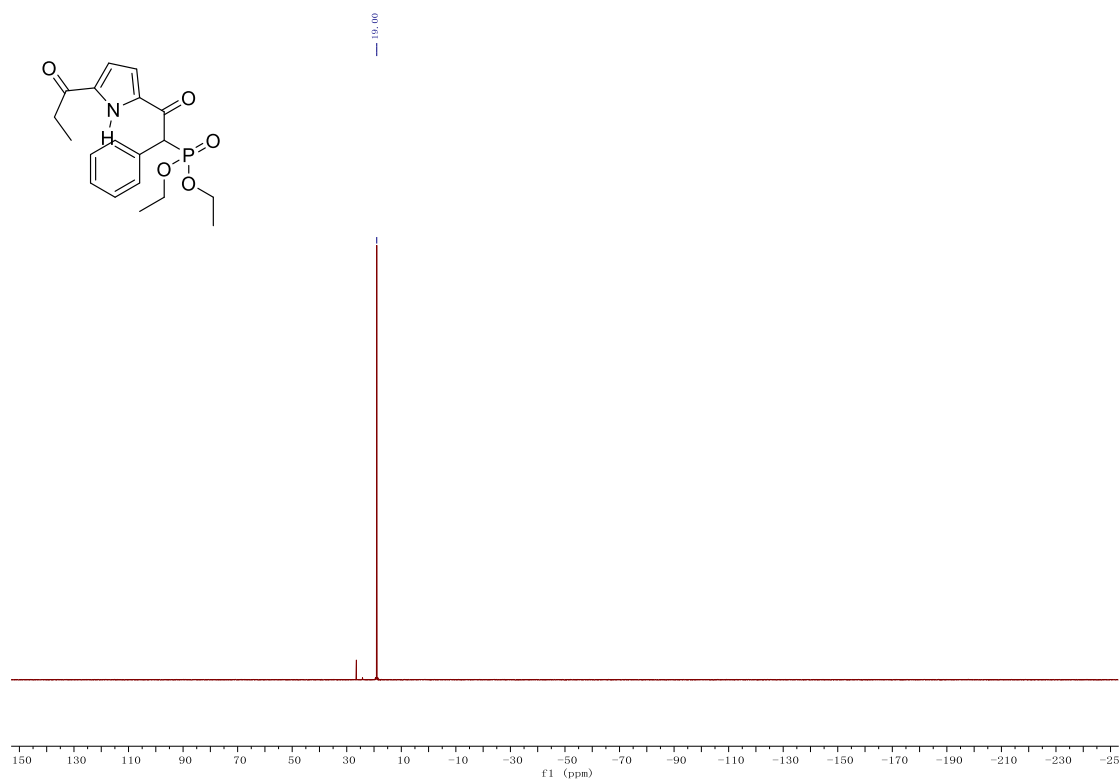

Figure S12. <sup>31</sup>P NMR (162 MHz, CDCl<sub>3</sub>) spectrum of 3w



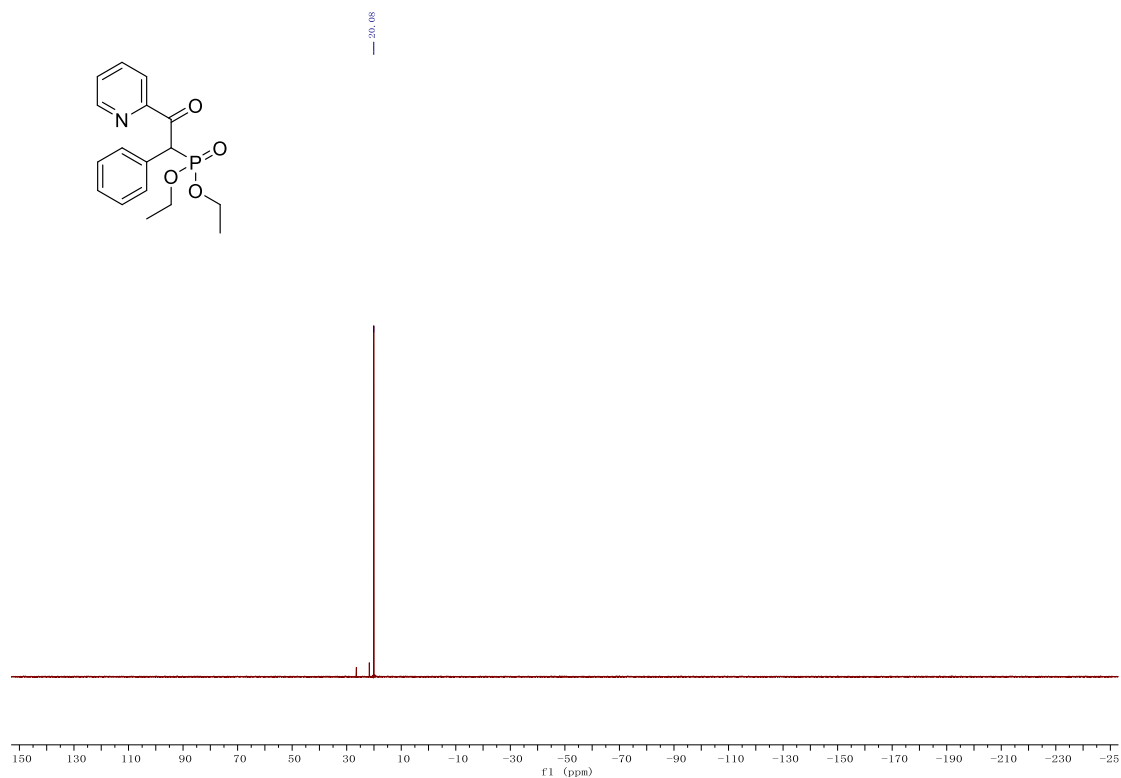

Figure S115.  $^{31}\text{P}$  NMR (162 MHz,  $\text{CDCl}_3$ ) spectrum of 3x

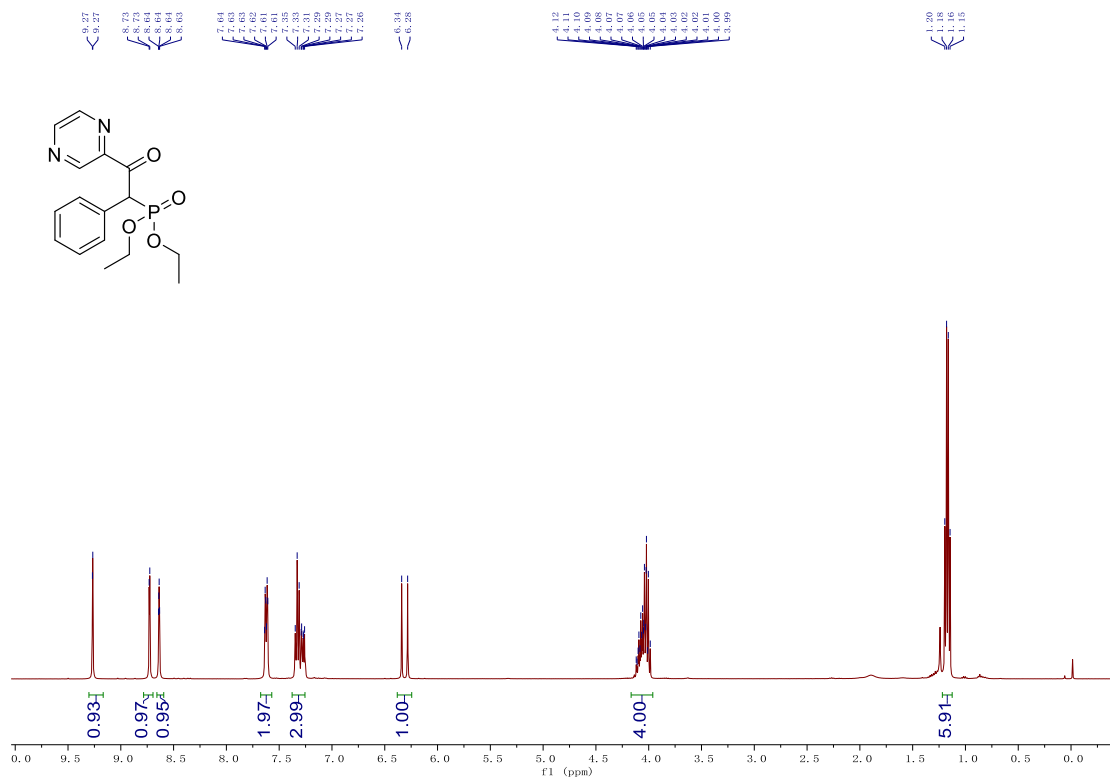

Figure S116.  $^1\text{H}$  NMR (400 MHz,  $\text{CDCl}_3$ ) spectrum of 3y

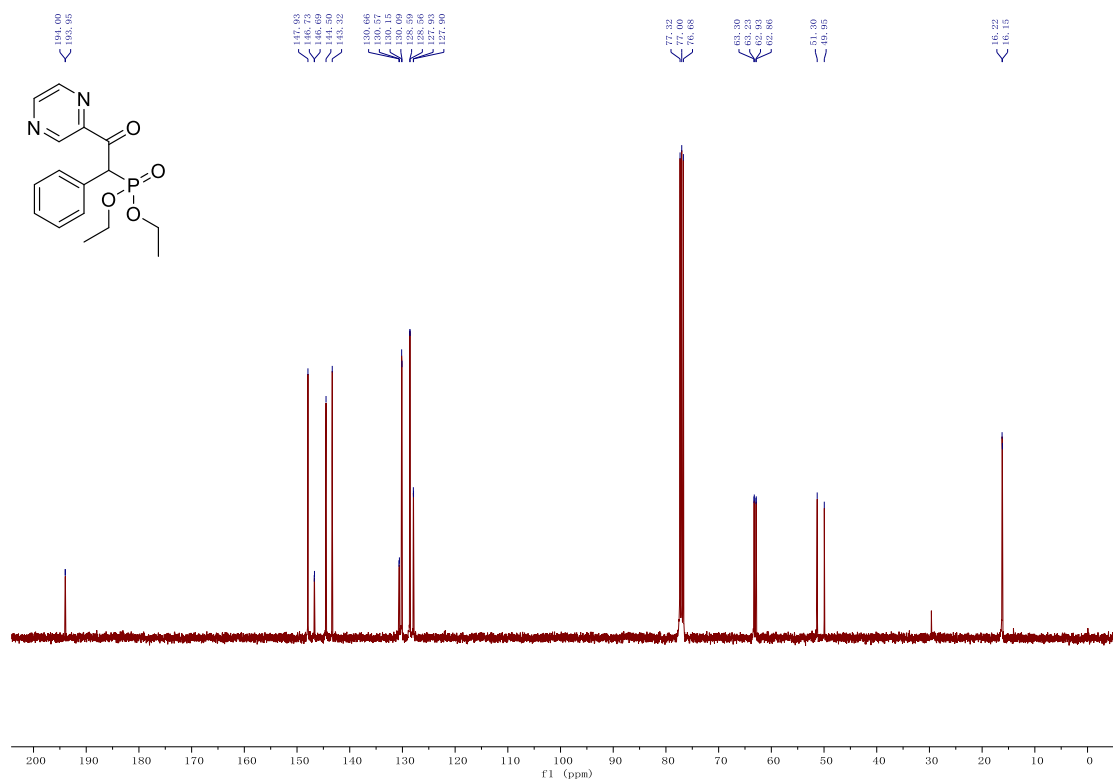

Figure S117.  $^{13}\text{C}$  NMR (101 MHz,  $\text{CDCl}_3$ ) spectrum of 3y

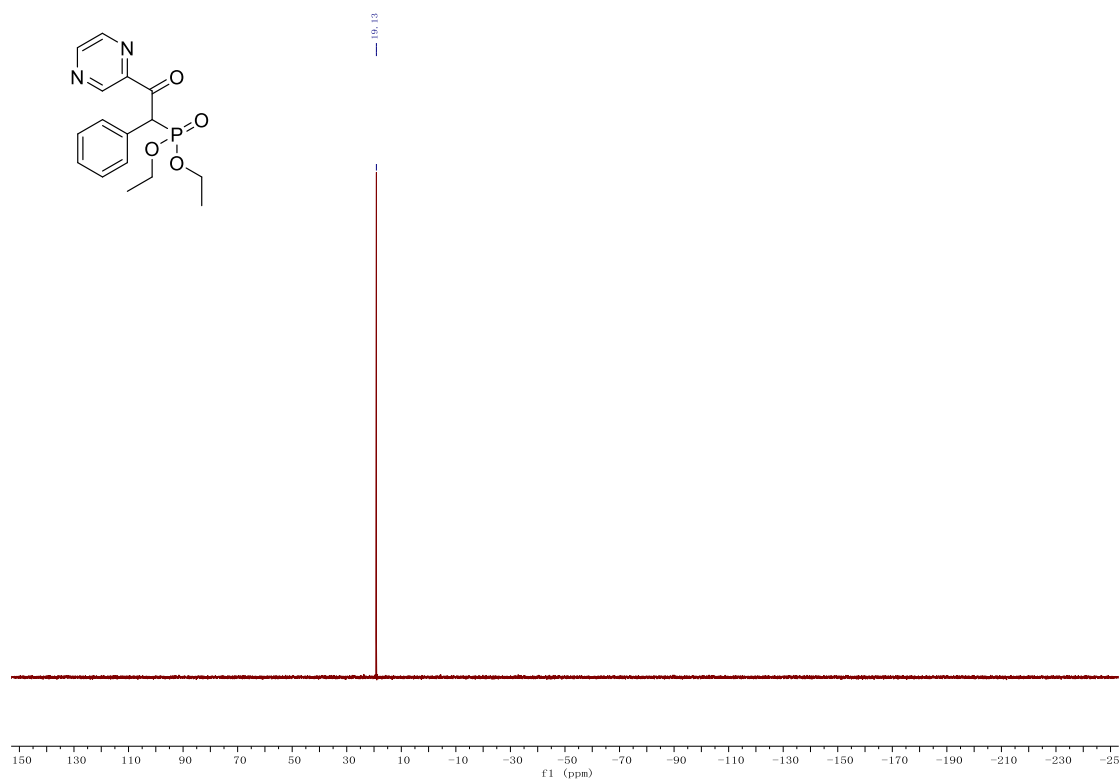

Figure S118.  $^{31}\text{P}$  NMR (162 MHz,  $\text{CDCl}_3$ ) spectrum of 3y

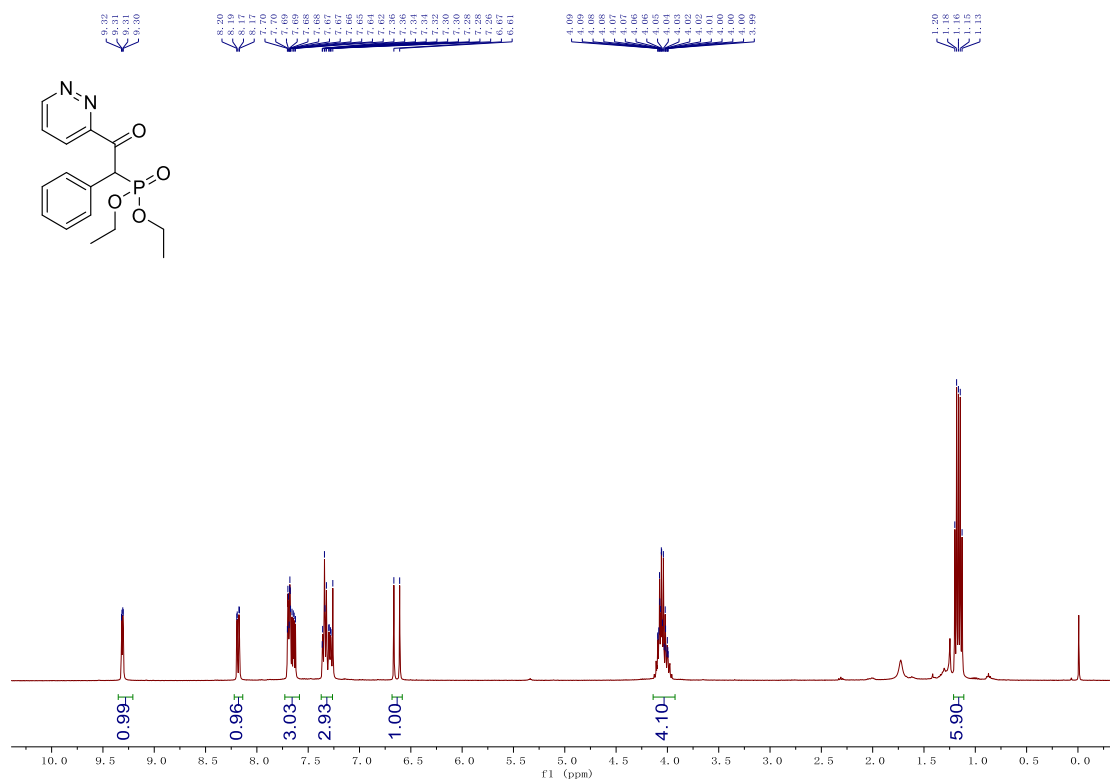

Figure S119. <sup>1</sup>H NMR (400 MHz, CDCl<sub>3</sub>) spectrum of 3z

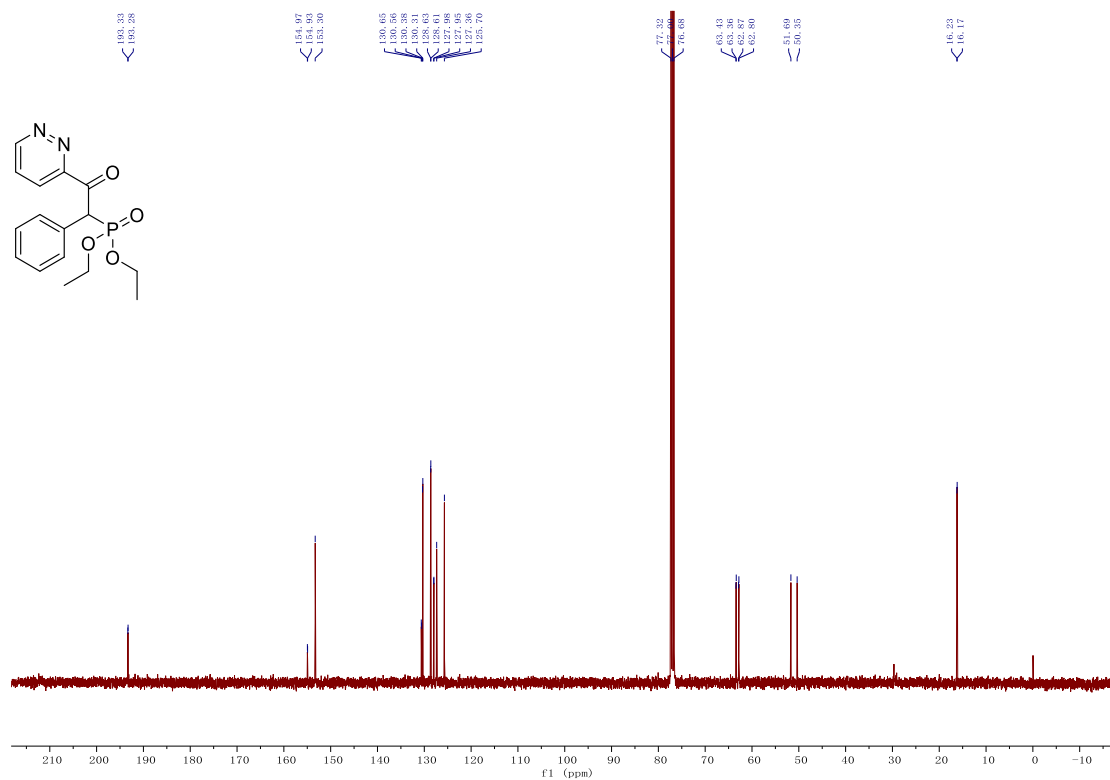

Figure S120. <sup>13</sup>C NMR (101 MHz, CDCl<sub>3</sub>) spectrum of 3z

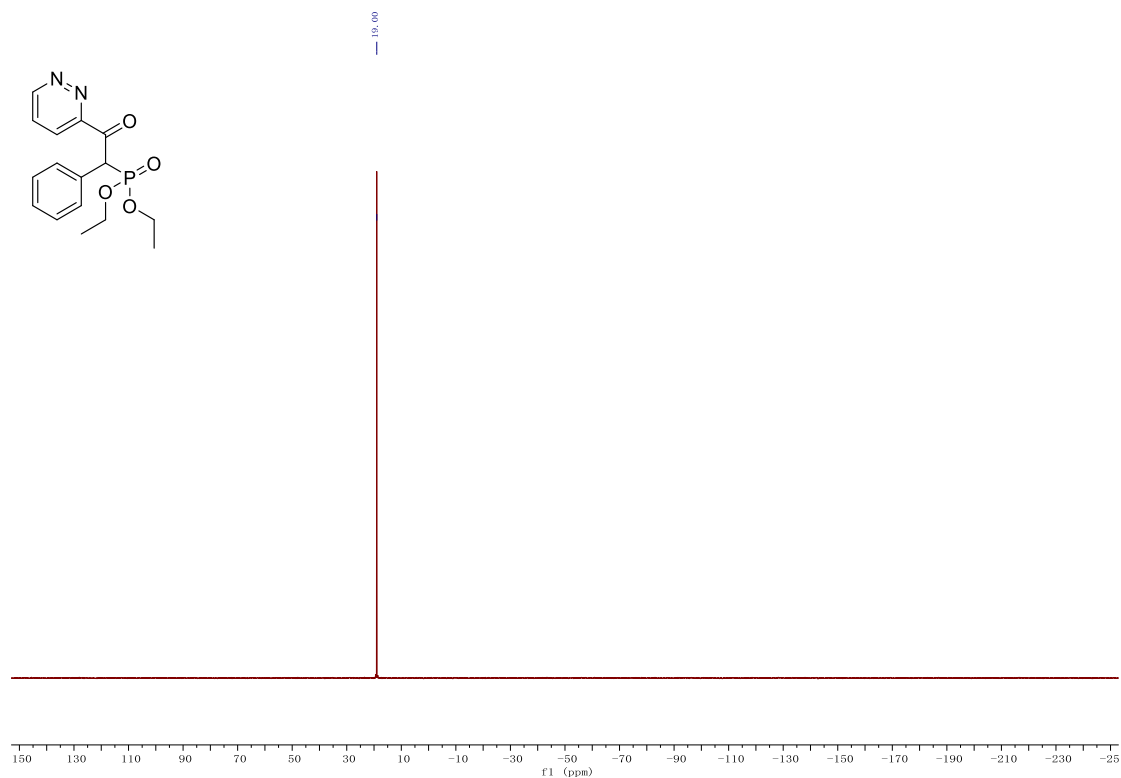

Figure S121.  $^{31}\text{P}$  NMR (162 MHz,  $\text{CDCl}_3$ ) spectrum of 3z

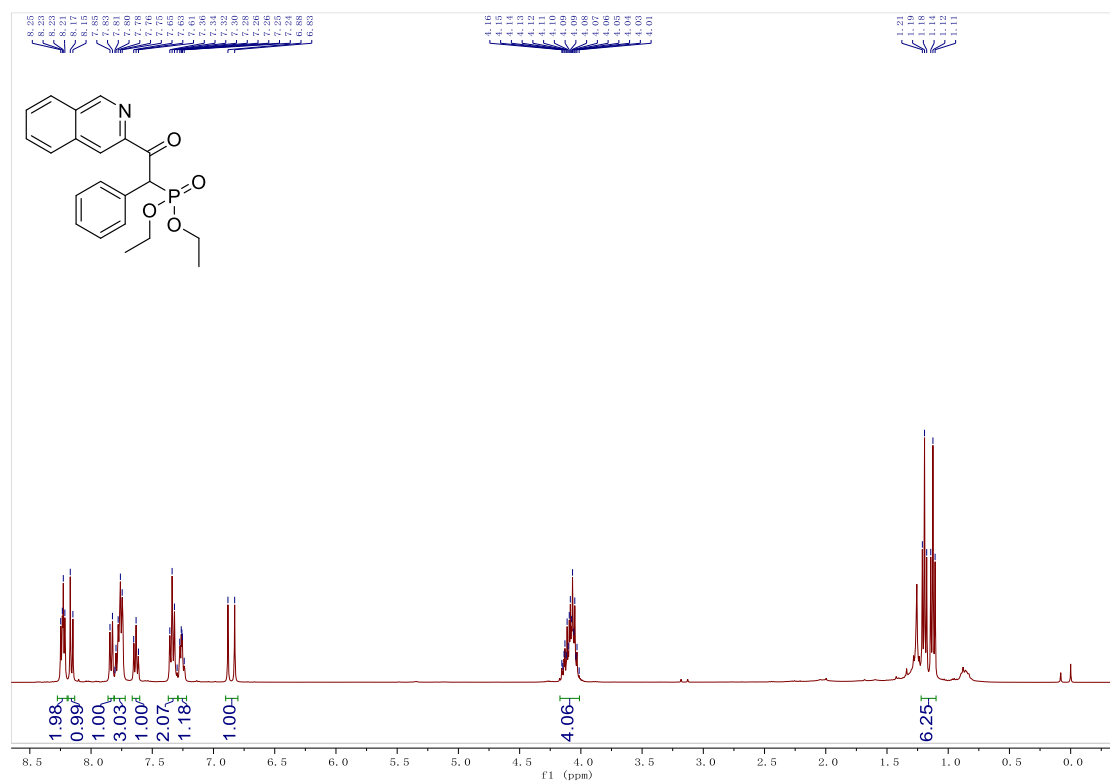

Figure S122.  $^1\text{H}$  NMR (400 MHz,  $\text{CDCl}_3$ ) spectrum of 3aa

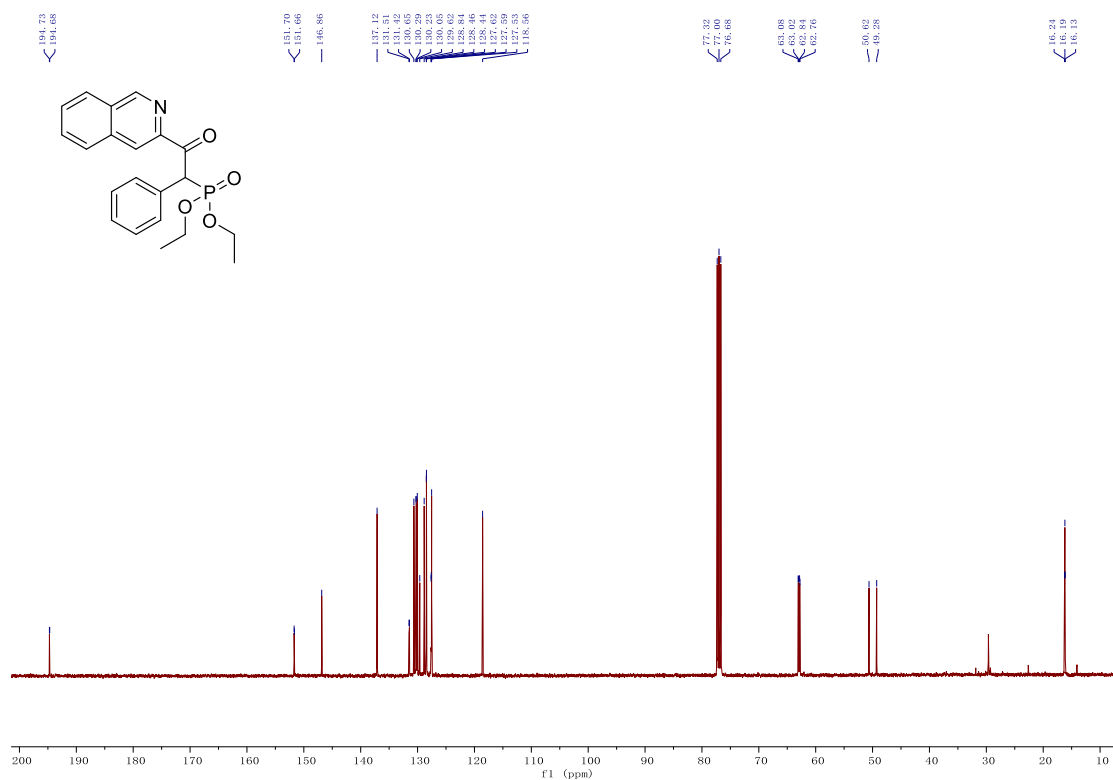

Figure S123. <sup>13</sup>C NMR (101 MHz, CDCl<sub>3</sub>) spectrum of 3aa

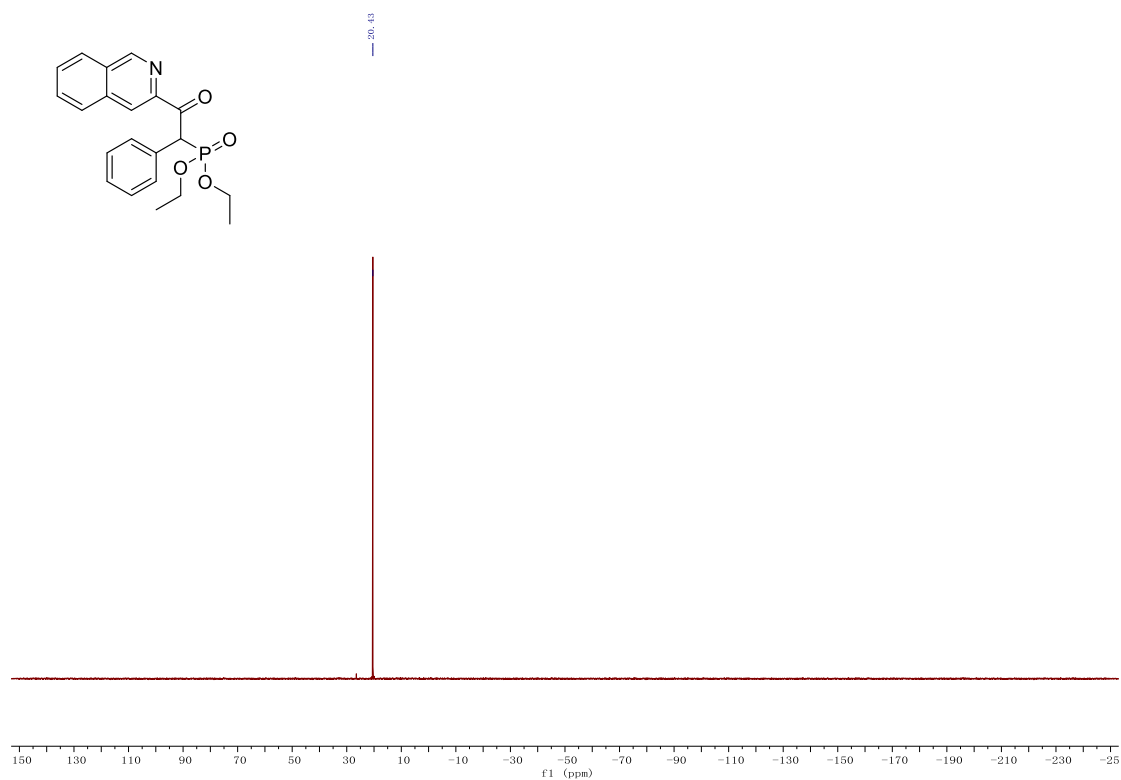

Figure S124. <sup>31</sup>P NMR (162 MHz, CDCl<sub>3</sub>) spectrum of 3aa



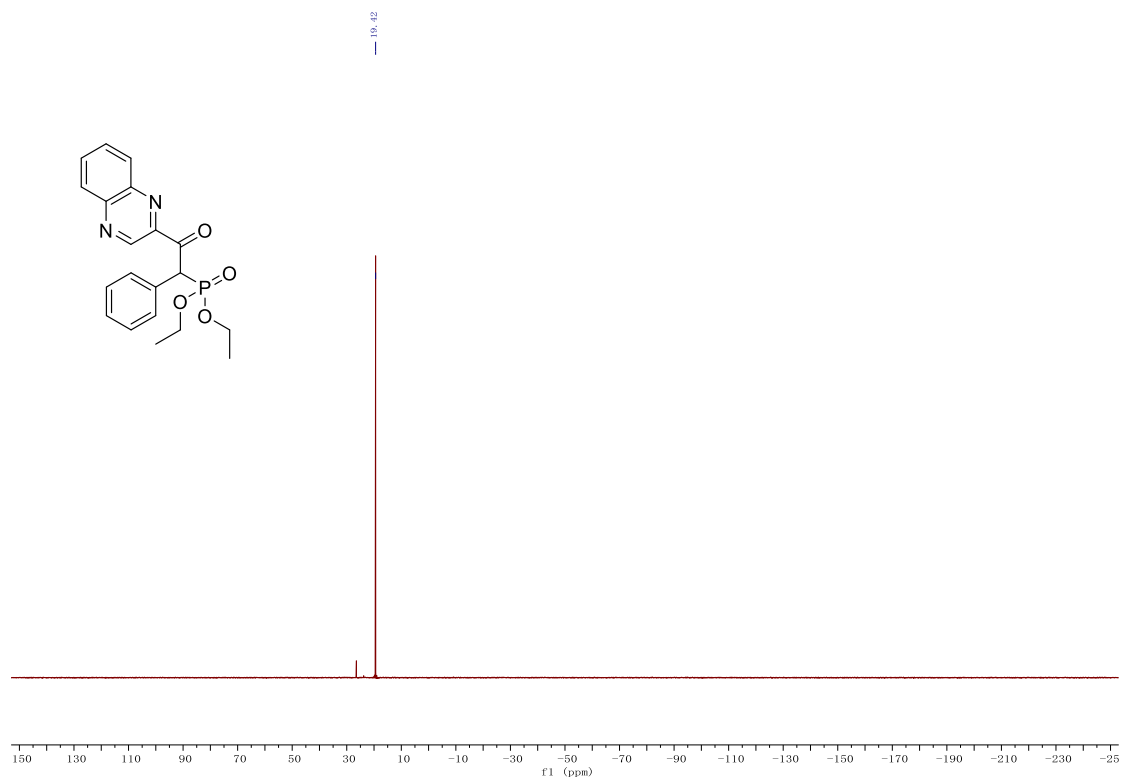

Figure S127.  $^{31}\text{P}$  NMR (162 MHz,  $\text{CDCl}_3$ ) spectrum of 3ab

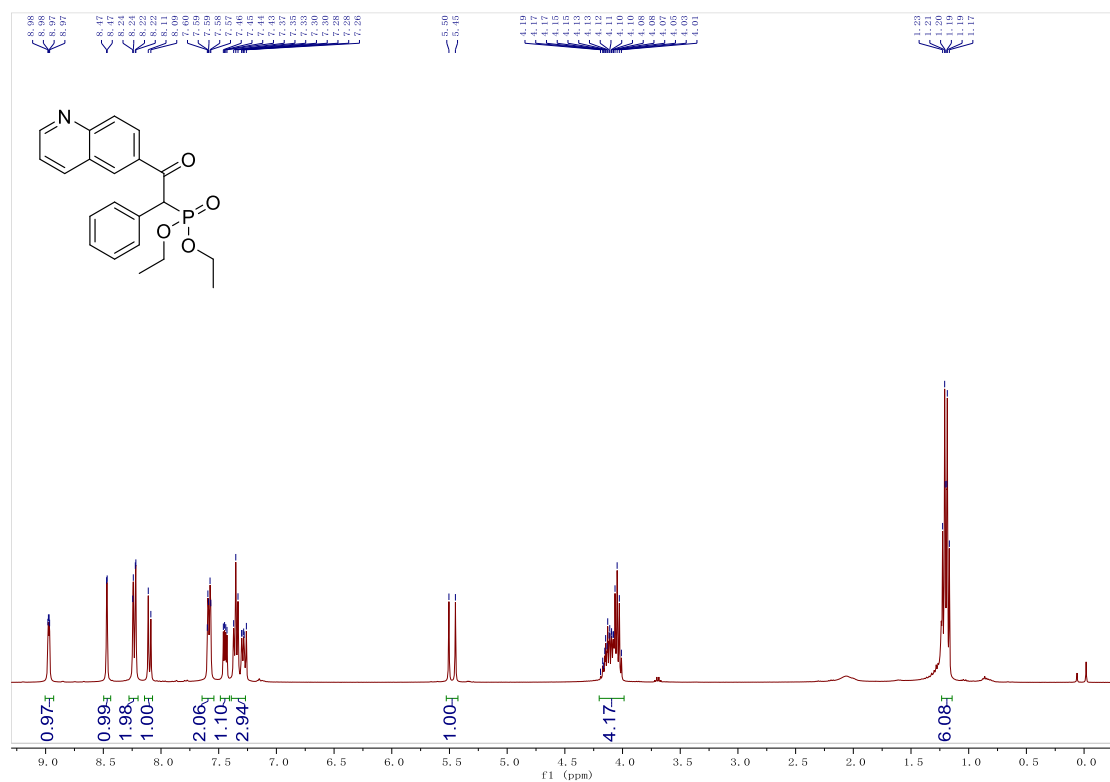

Figure S128.  $^1\text{H}$  NMR (400 MHz,  $\text{CDCl}_3$ ) spectrum of 3ac

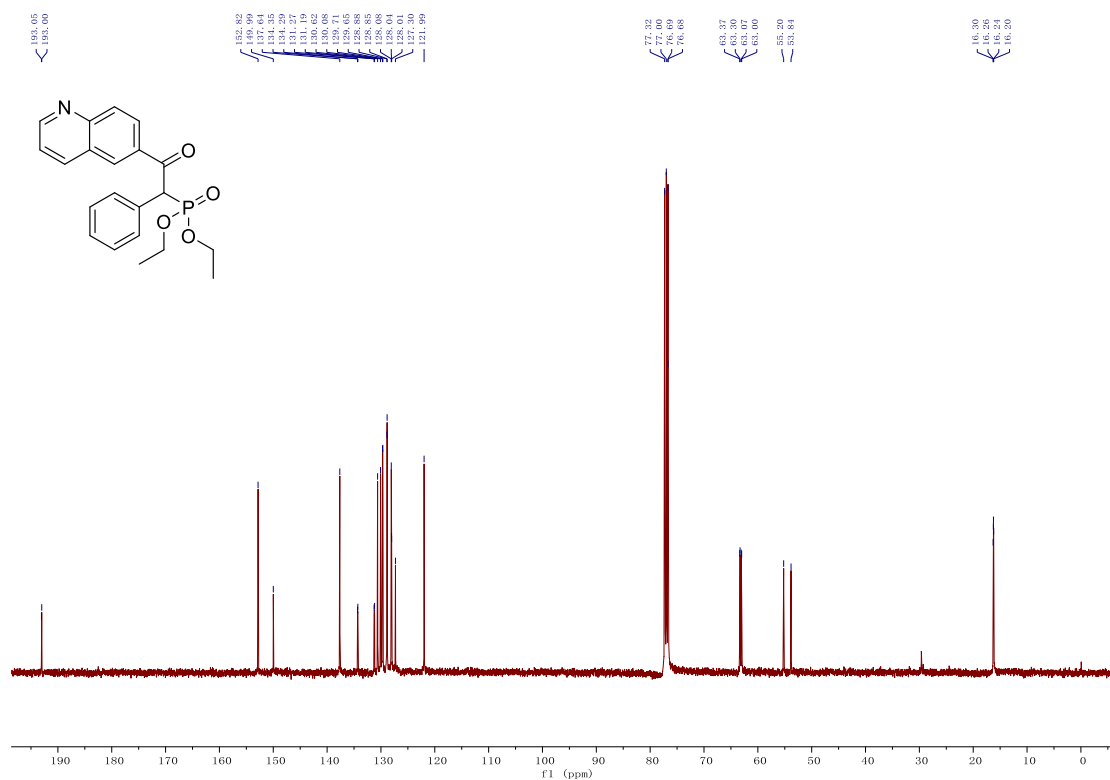

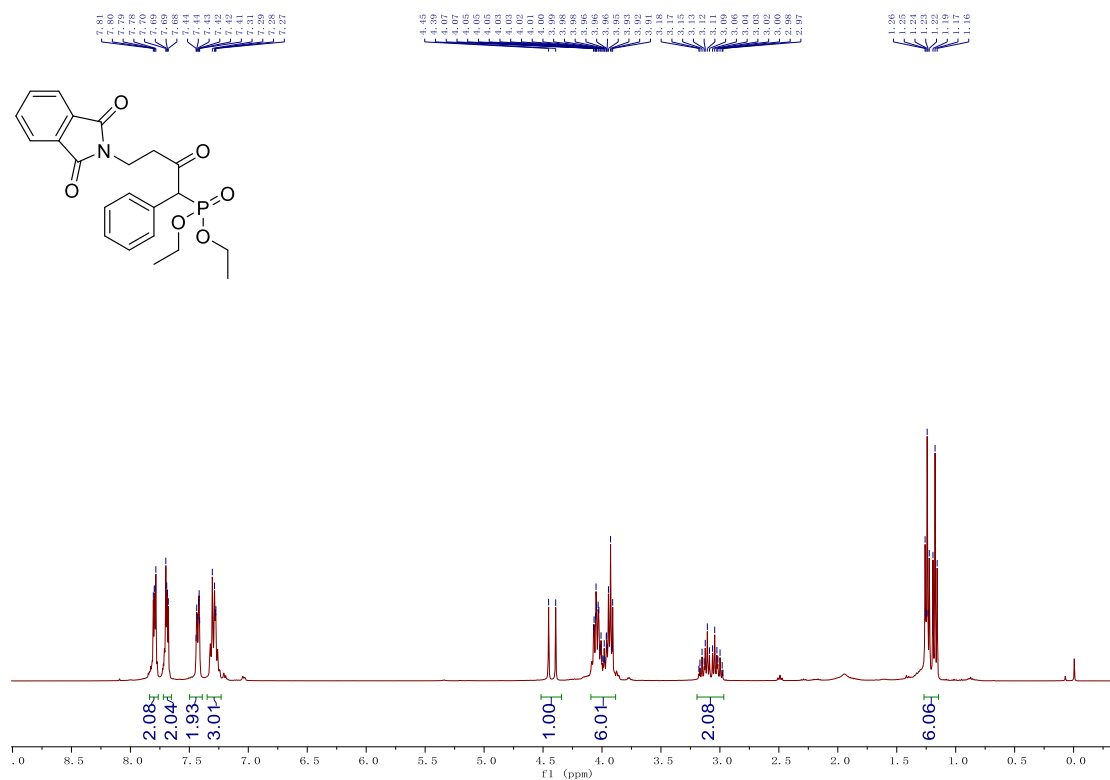

Figure S131. <sup>1</sup>H NMR (400 MHz, CDCl<sub>3</sub>) spectrum of **3ad**

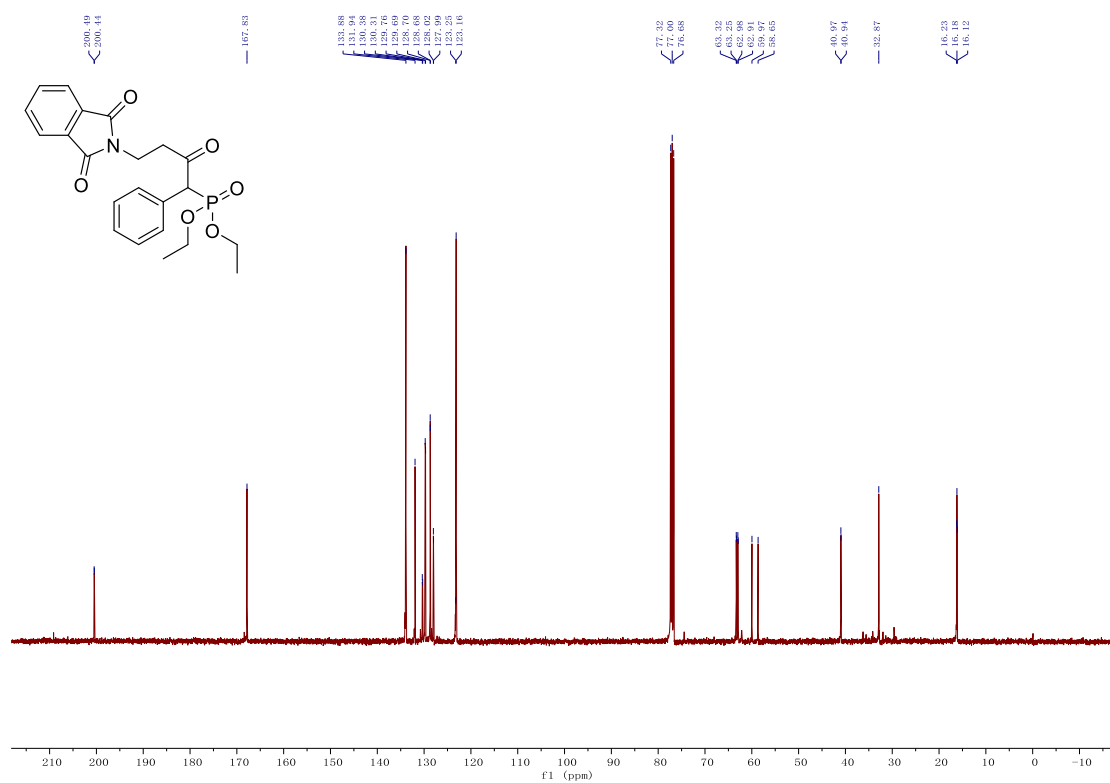

Figure S132. <sup>13</sup>C NMR (101 MHz, CDCl<sub>3</sub>) spectrum of **3ad**

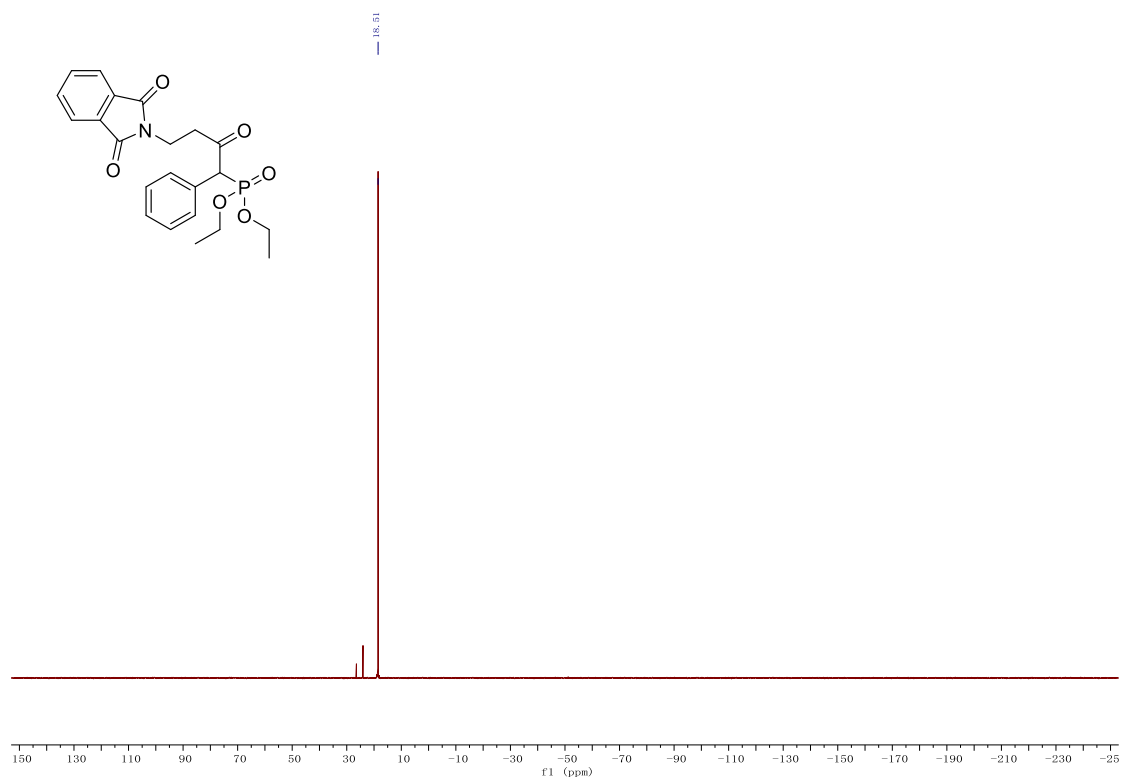

Figure S133.  $^{31}\text{P}$  NMR (162 MHz,  $\text{CDCl}_3$ ) spectrum of 3ad

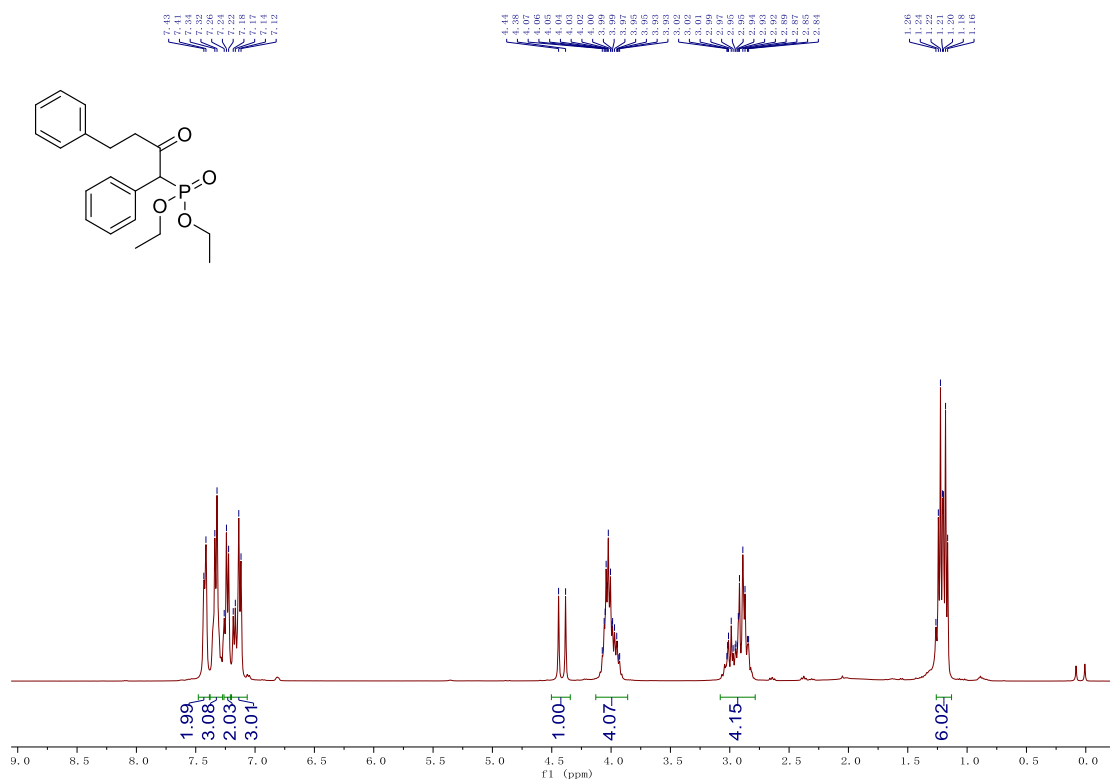

Figure S134.  $^1\text{H}$  NMR (400 MHz,  $\text{CDCl}_3$ ) spectrum of 3ae

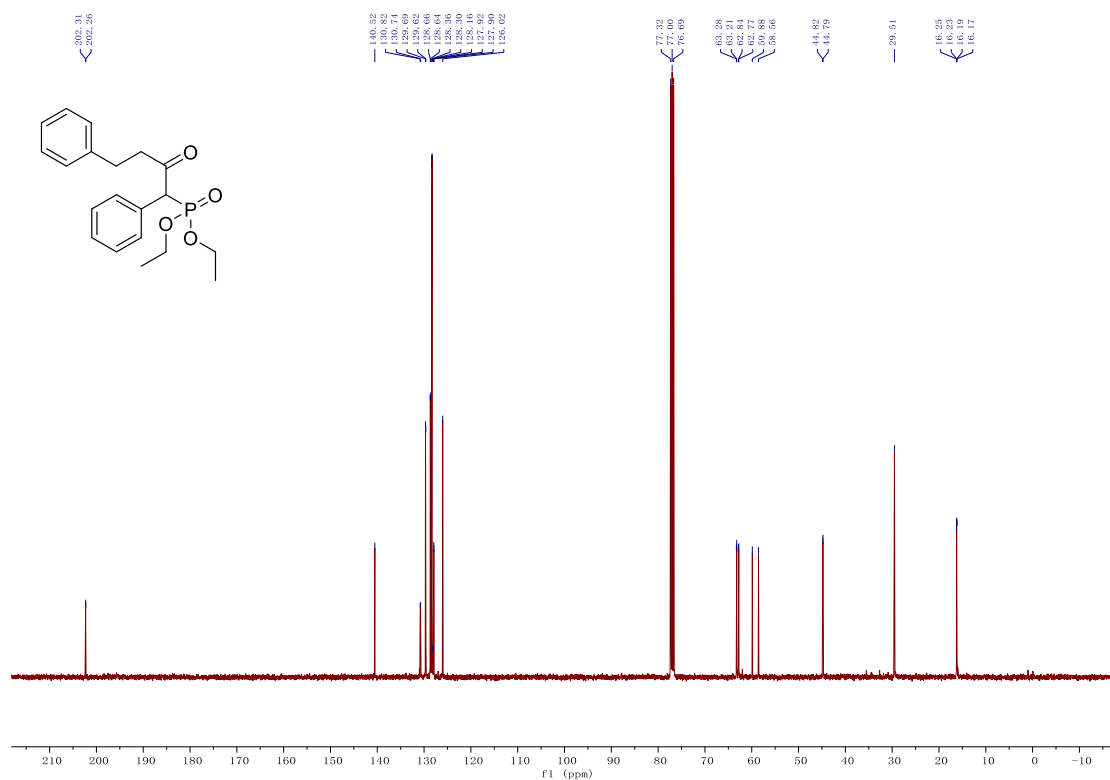

Figure S135. <sup>13</sup>C NMR (101 MHz, CDCl<sub>3</sub>) spectrum of 3ae

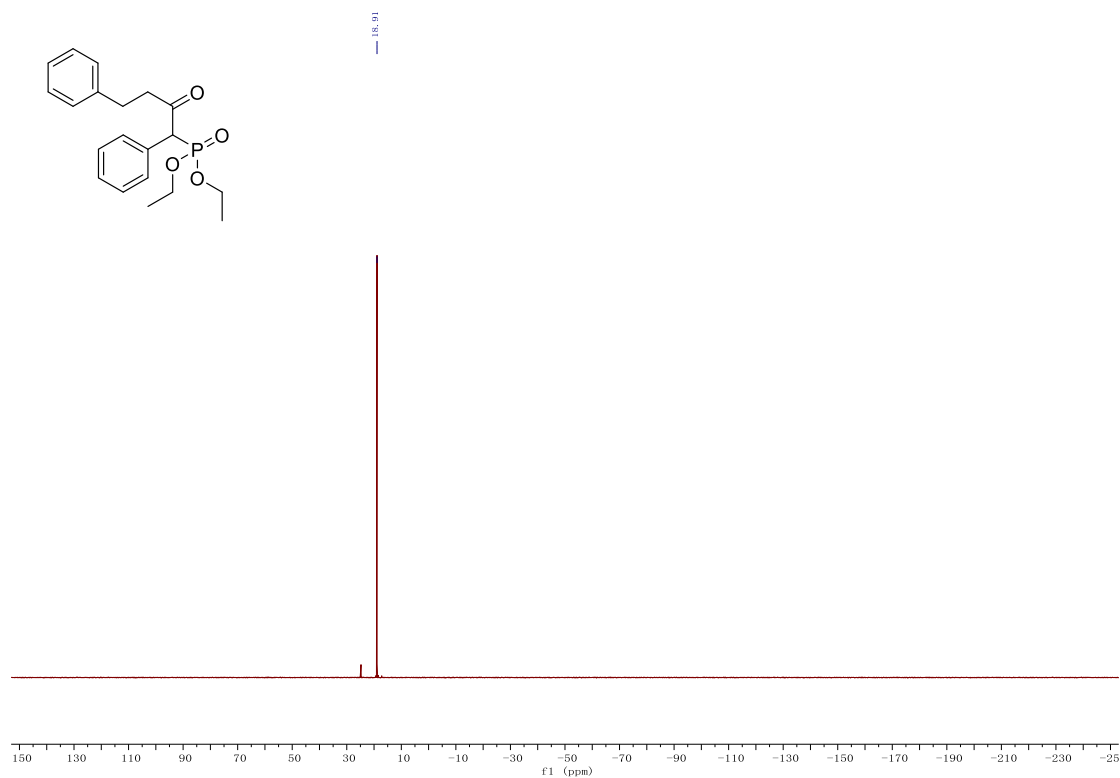

Figure S136. <sup>31</sup>P NMR (162 MHz, CDCl<sub>3</sub>) spectrum of 3ae

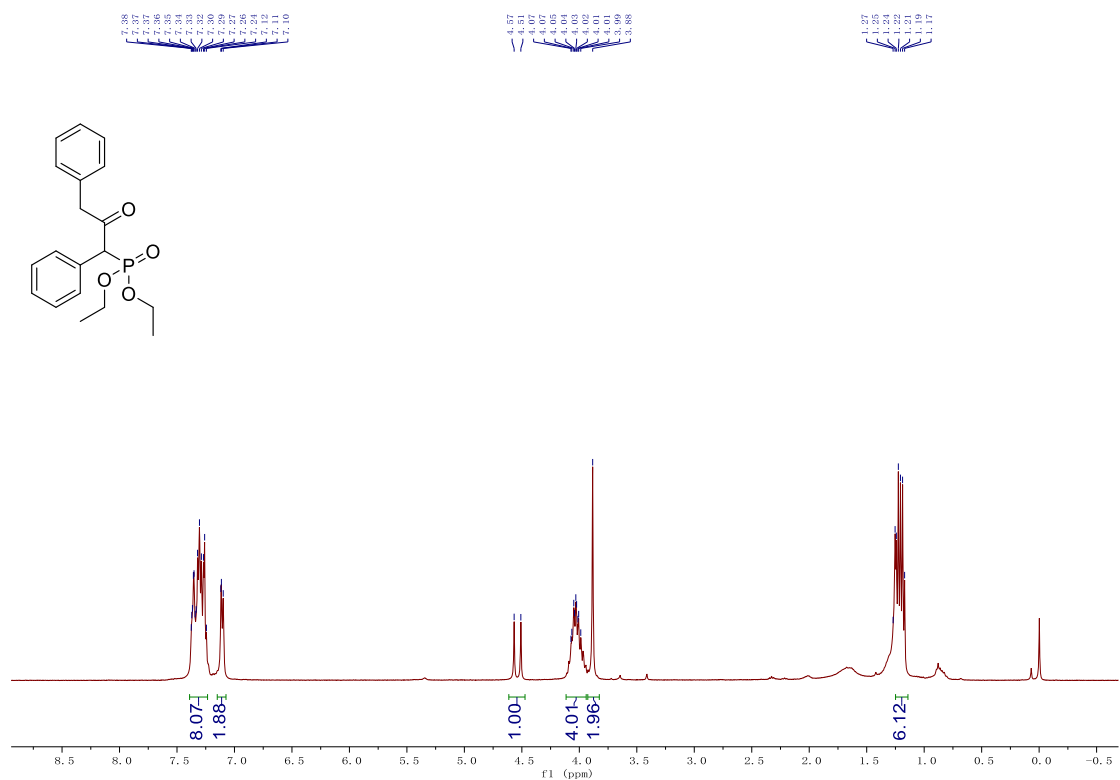

Figure S137. <sup>1</sup>H NMR (400 MHz, CDCl<sub>3</sub>) spectrum of 3af

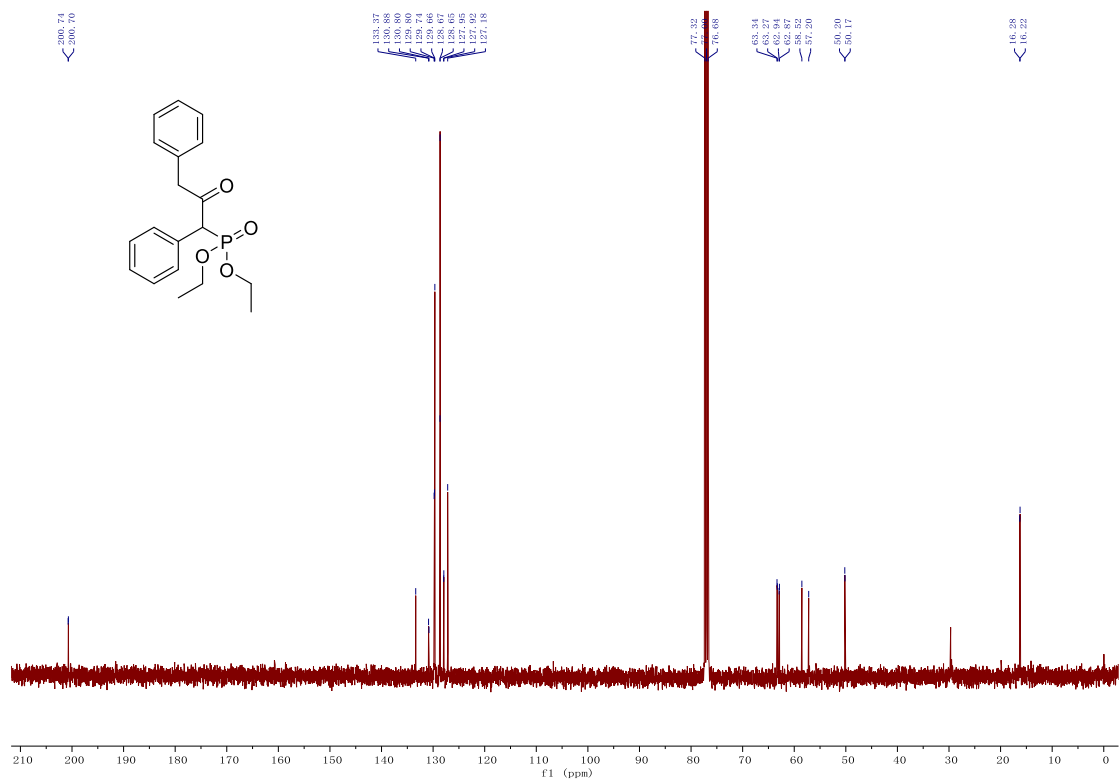

Figure S138. <sup>13</sup>C NMR (101 MHz, CDCl<sub>3</sub>) spectrum of 3af

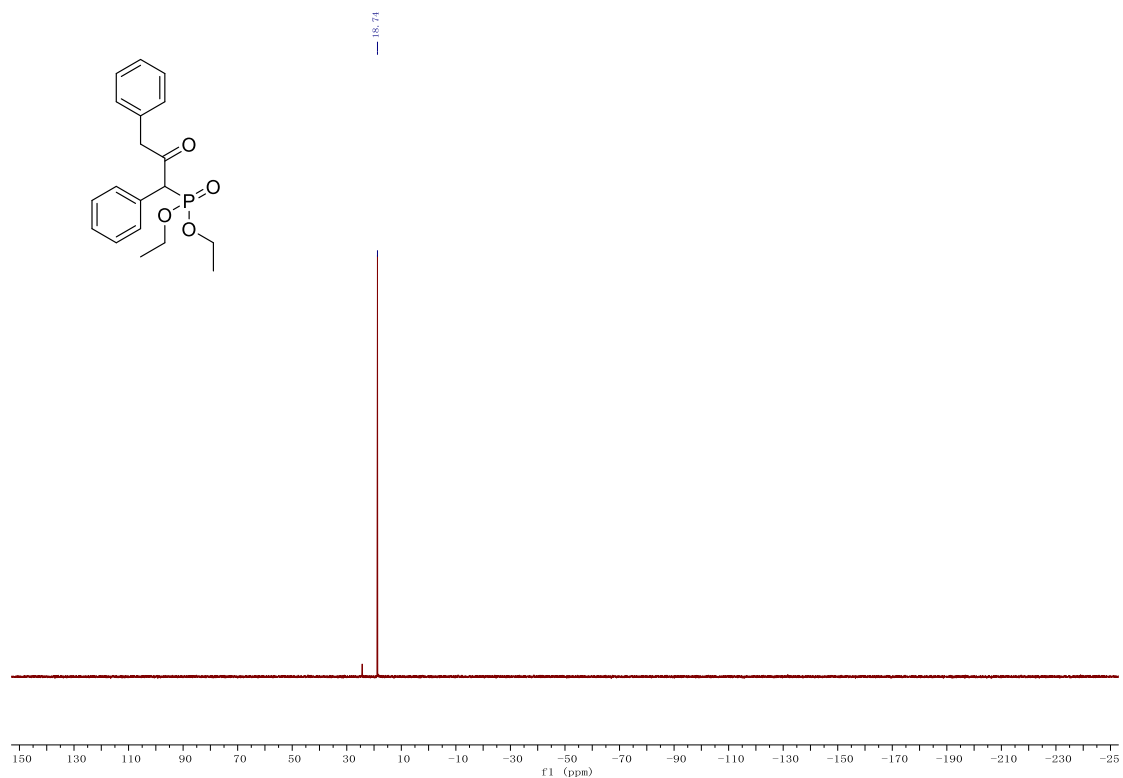

Figure S139.  $^{31}\text{P}$  NMR (162 MHz,  $\text{CDCl}_3$ ) spectrum of 3af

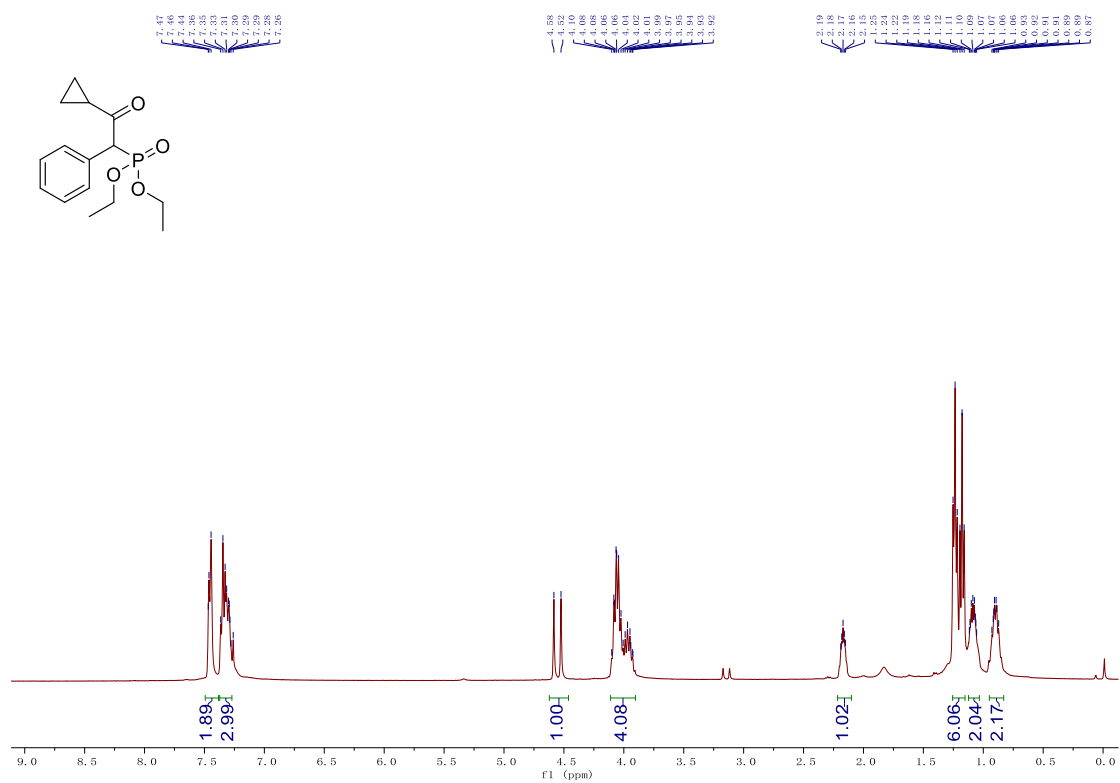

Figure S140.  $^1\text{H}$  NMR (400 MHz,  $\text{CDCl}_3$ ) spectrum of 3ag

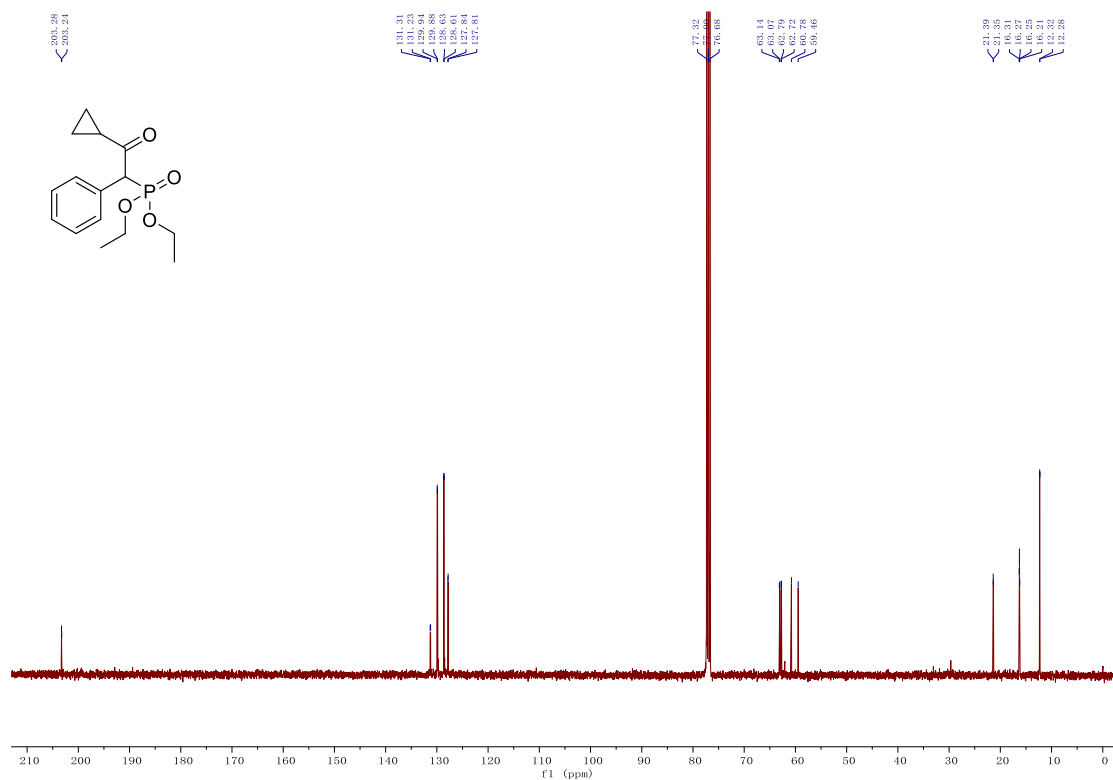

Figure S141. <sup>13</sup>C NMR (101 MHz, CDCl<sub>3</sub>) spectrum of 3ag

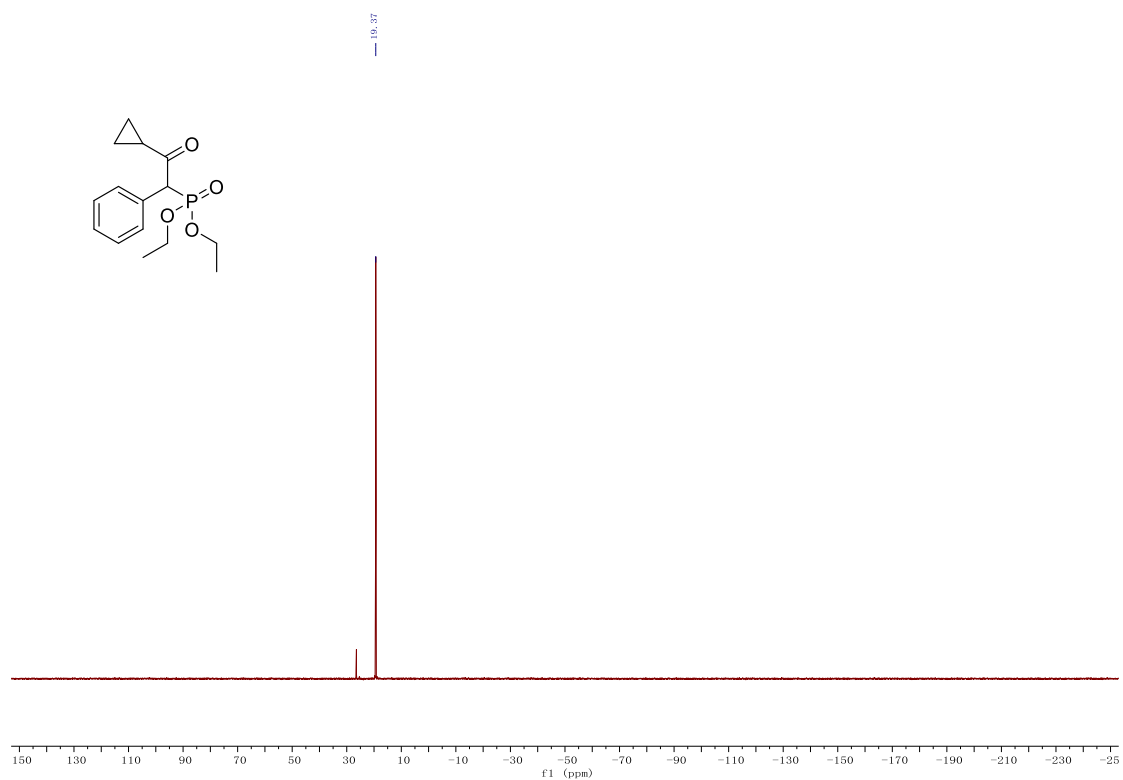

Figure S142. <sup>31</sup>P NMR (162 MHz, CDCl<sub>3</sub>) spectrum of 3ag

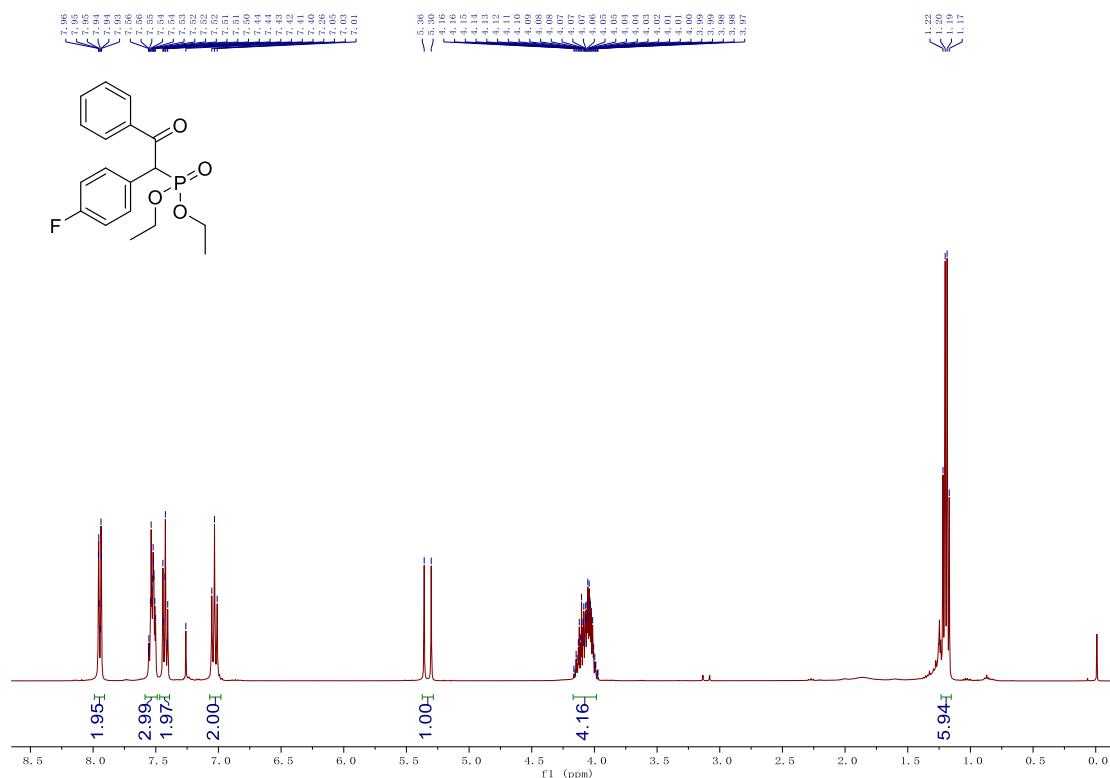

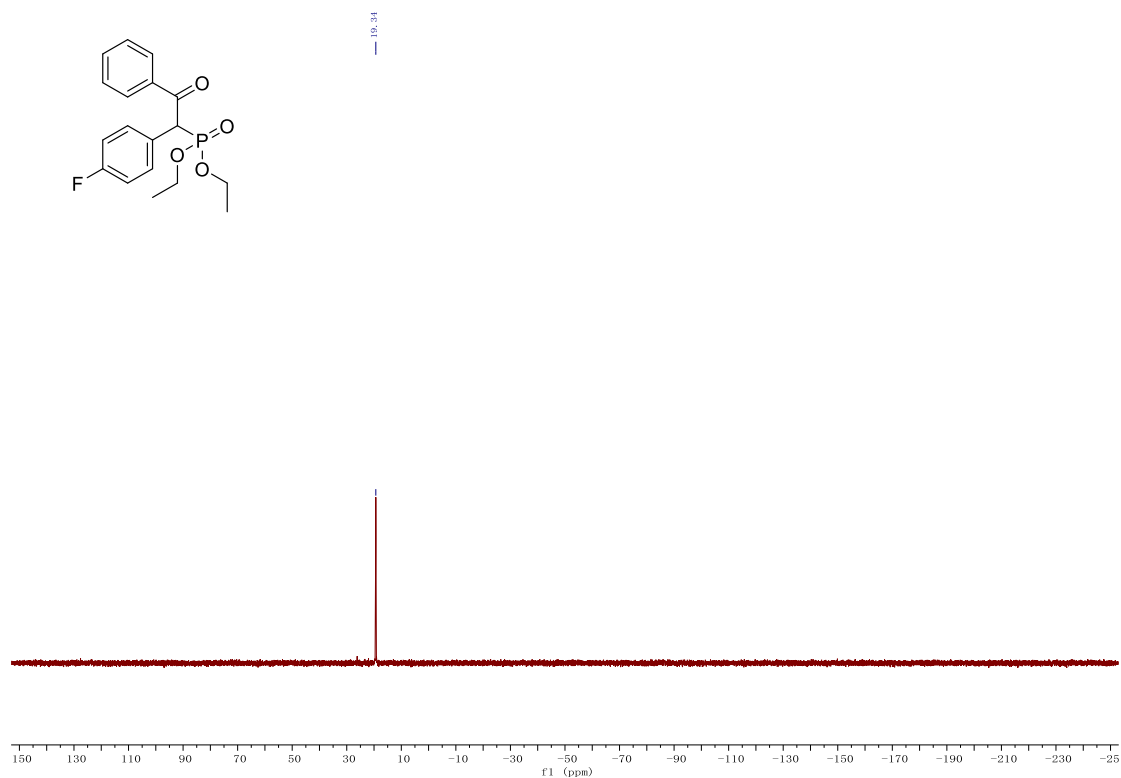

Figure S145.  $^{31}\text{P}$  NMR (162 MHz,  $\text{CDCl}_3$ ) spectrum of 4a

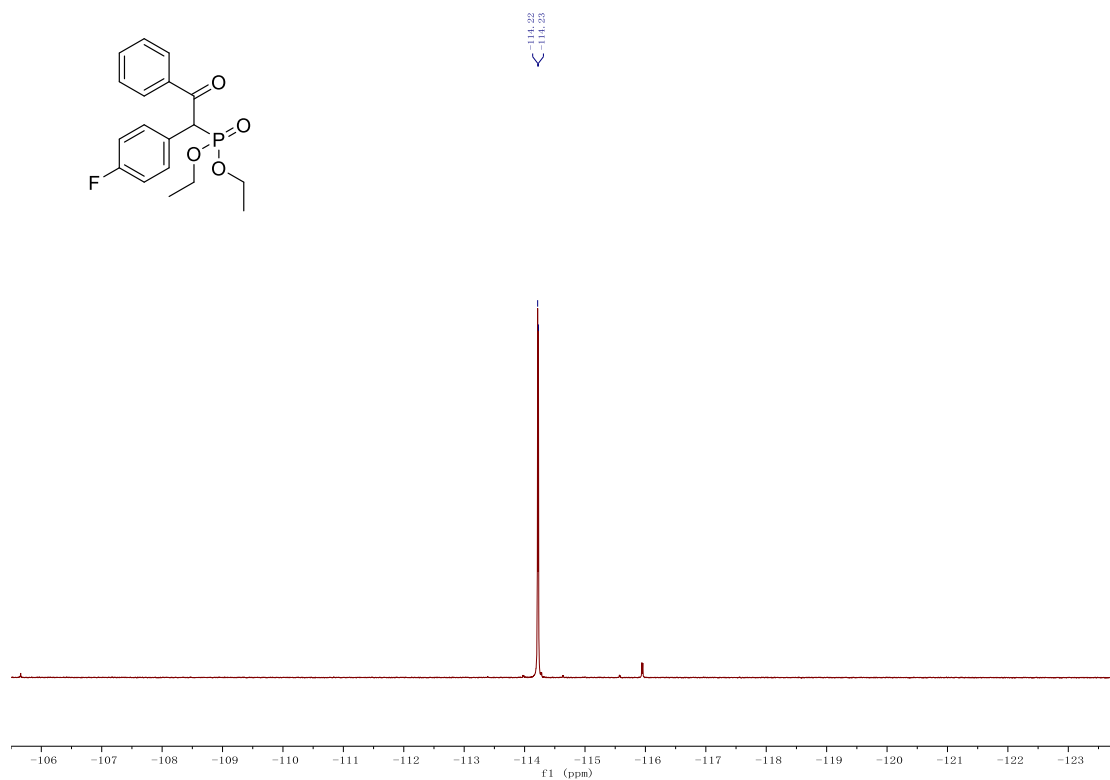

Figure S146.  $^{19}\text{F}$  NMR (377 MHz,  $\text{CDCl}_3$ ) spectrum of 4a



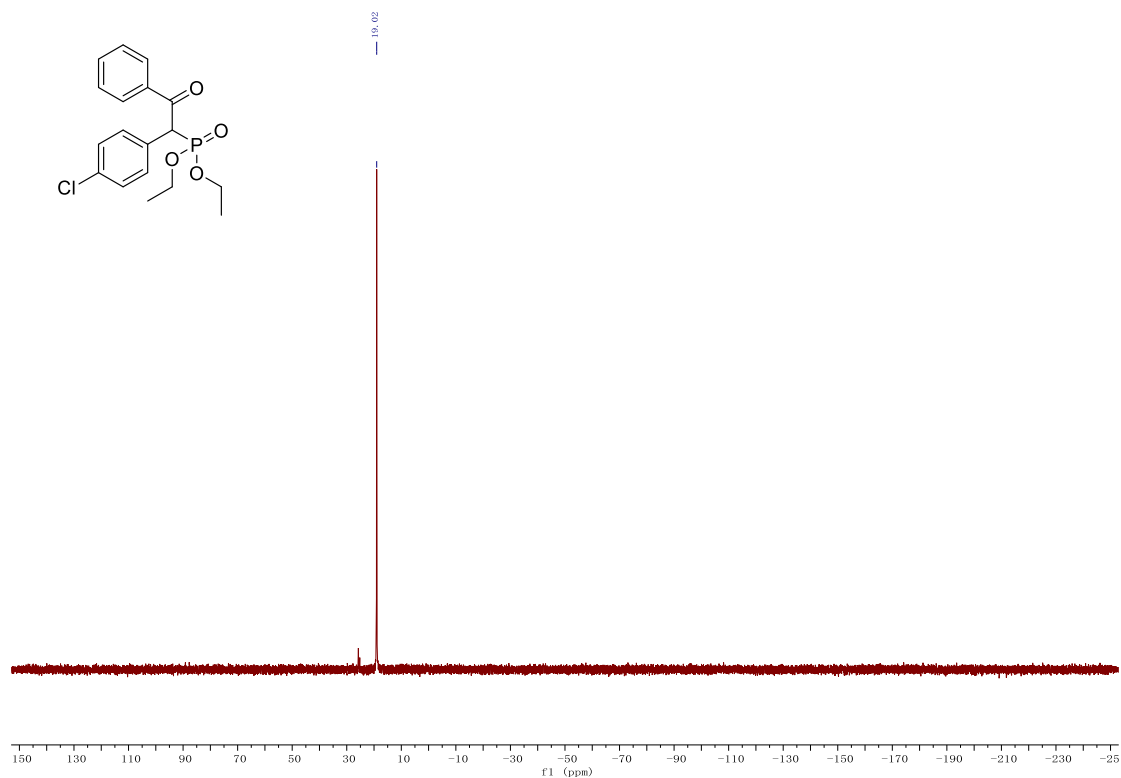

Figure S149.  $^{31}\text{P}$  NMR (162 MHz,  $\text{CDCl}_3$ ) spectrum of 4b

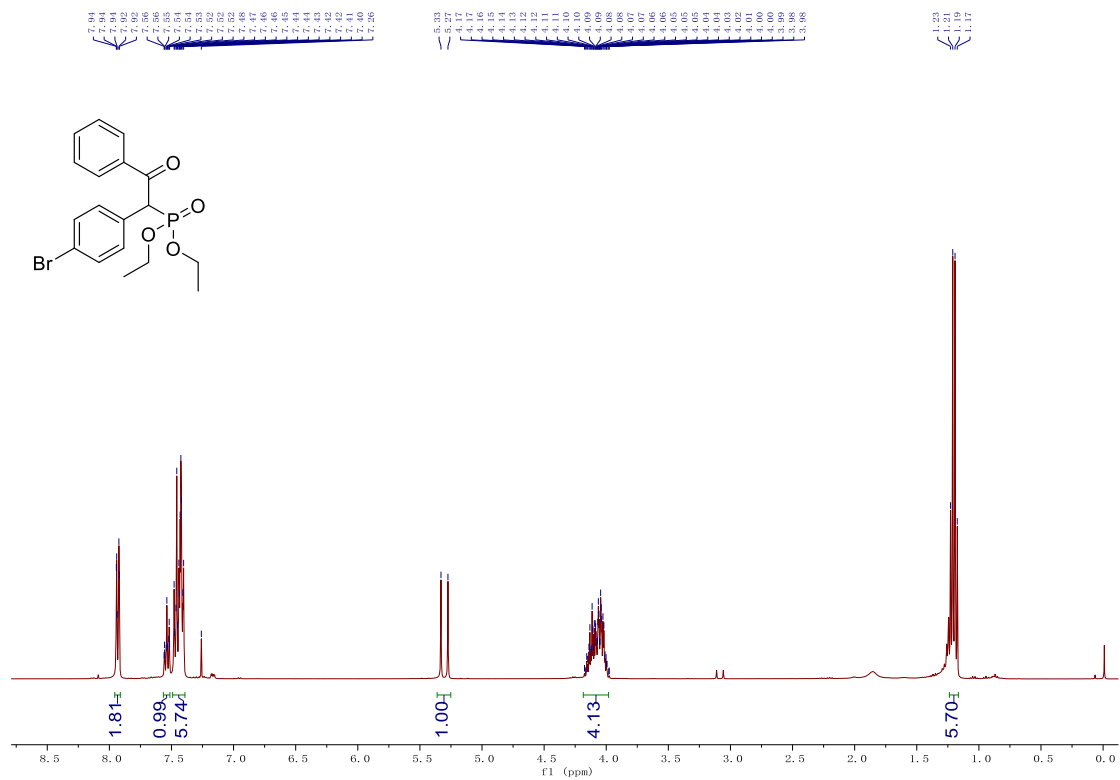

Figure S150.  $^1\text{H}$  NMR (400 MHz,  $\text{CDCl}_3$ ) spectrum of 4c

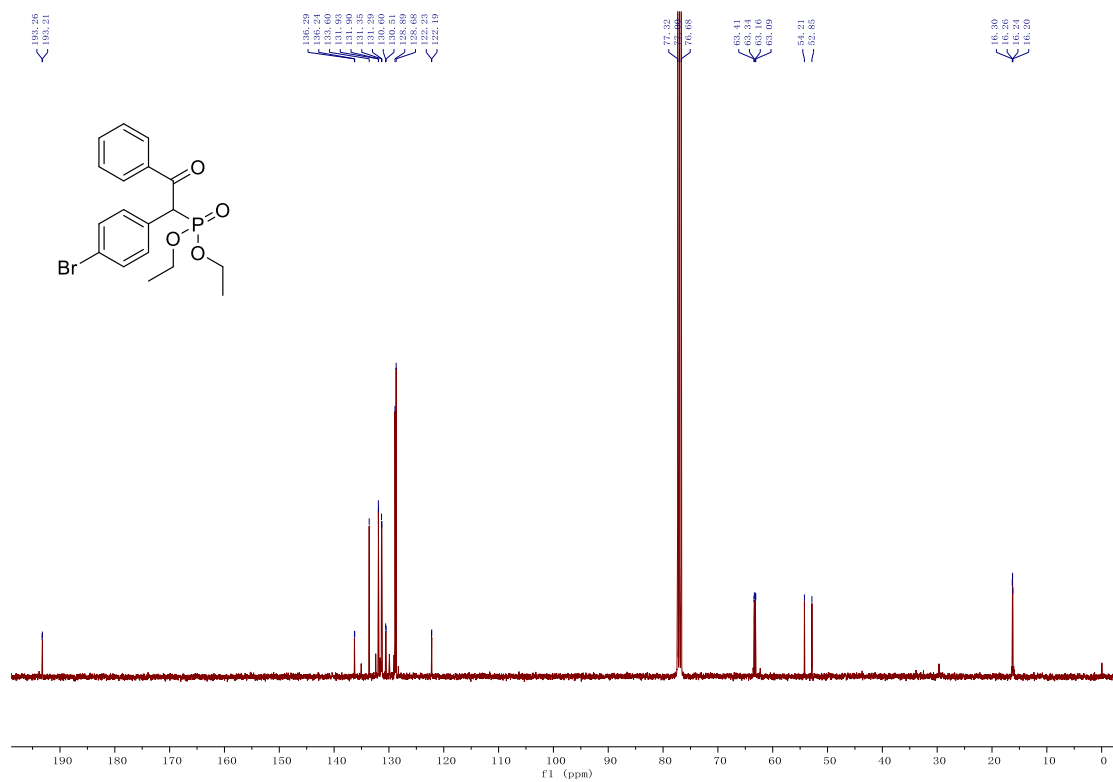

Figure S151 <sup>13</sup>C NMR (101 MHz, CDCl<sub>3</sub>) spectrum of 4c

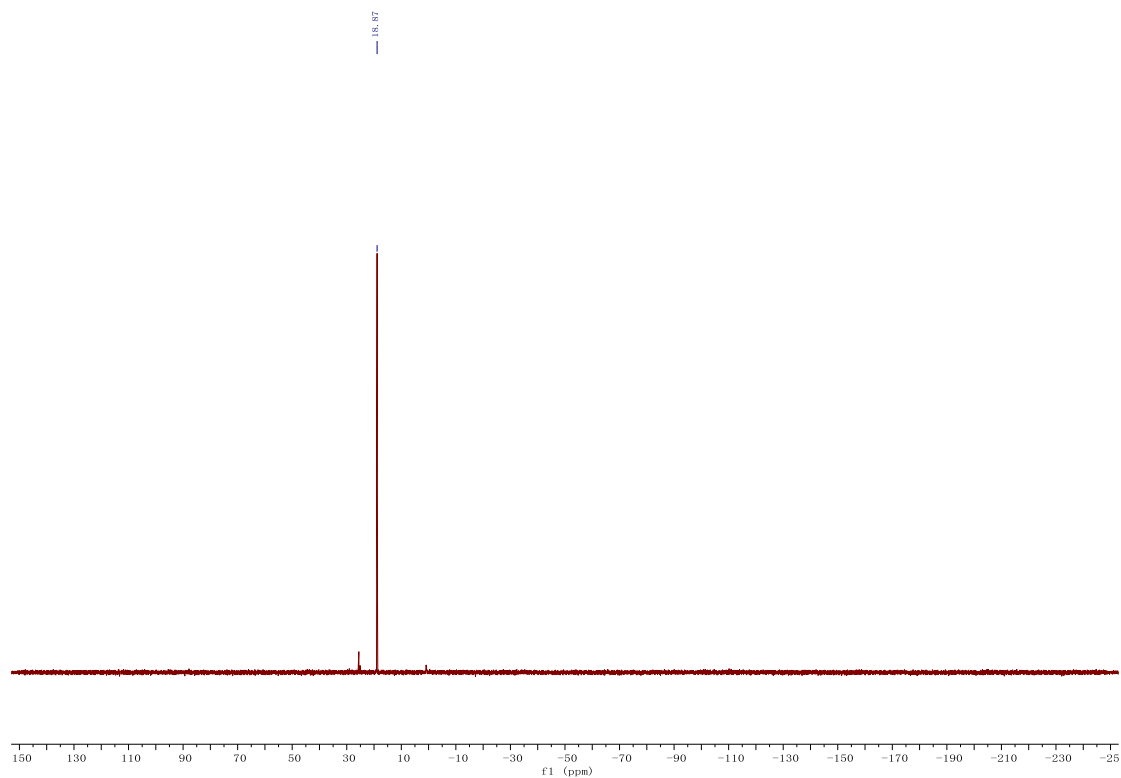

Figure S152. <sup>31</sup>P NMR (162 MHz, CDCl<sub>3</sub>).spectrum of 4c

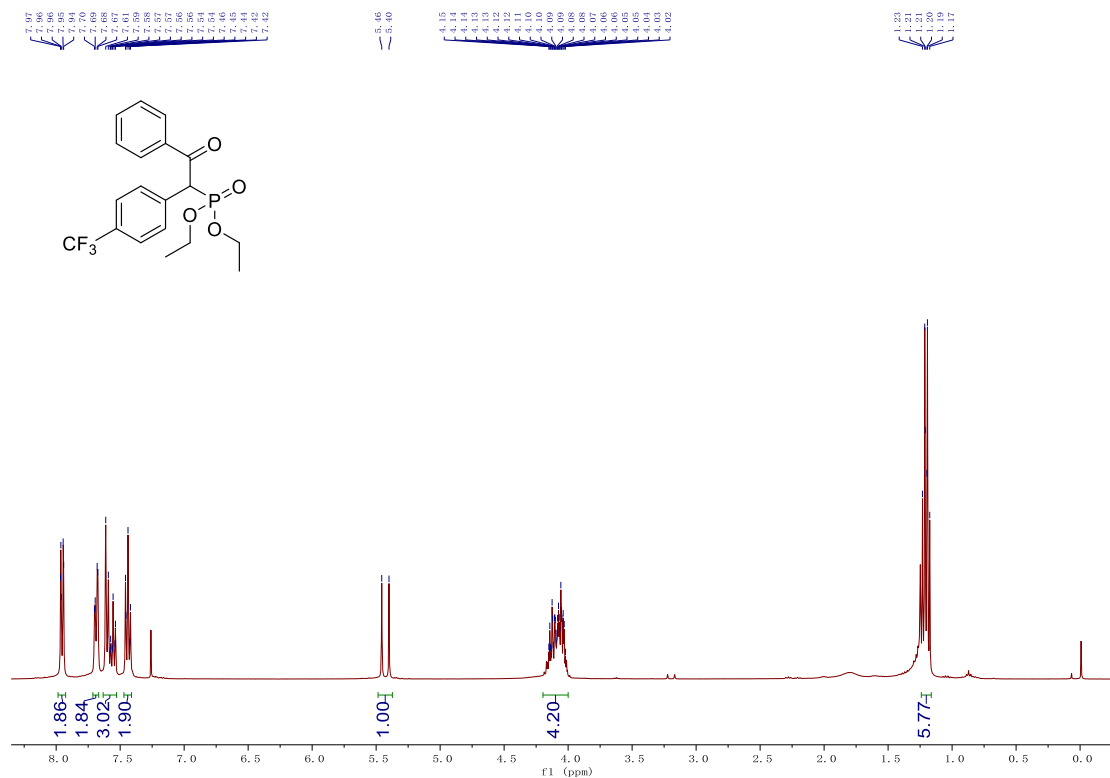

Figure S153. <sup>1</sup>H NMR (400 MHz, CDCl<sub>3</sub>) spectrum of 4d

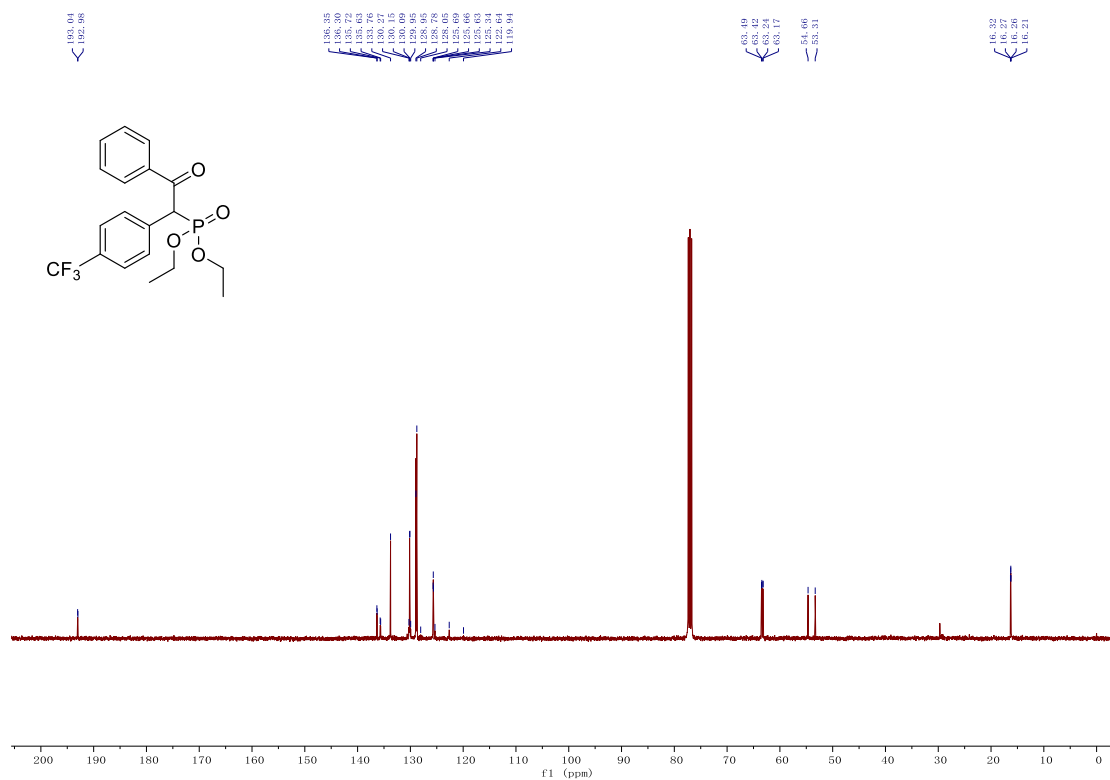

Figure S154. <sup>13</sup>C NMR (101 MHz, CDCl<sub>3</sub>) spectrum of 4d

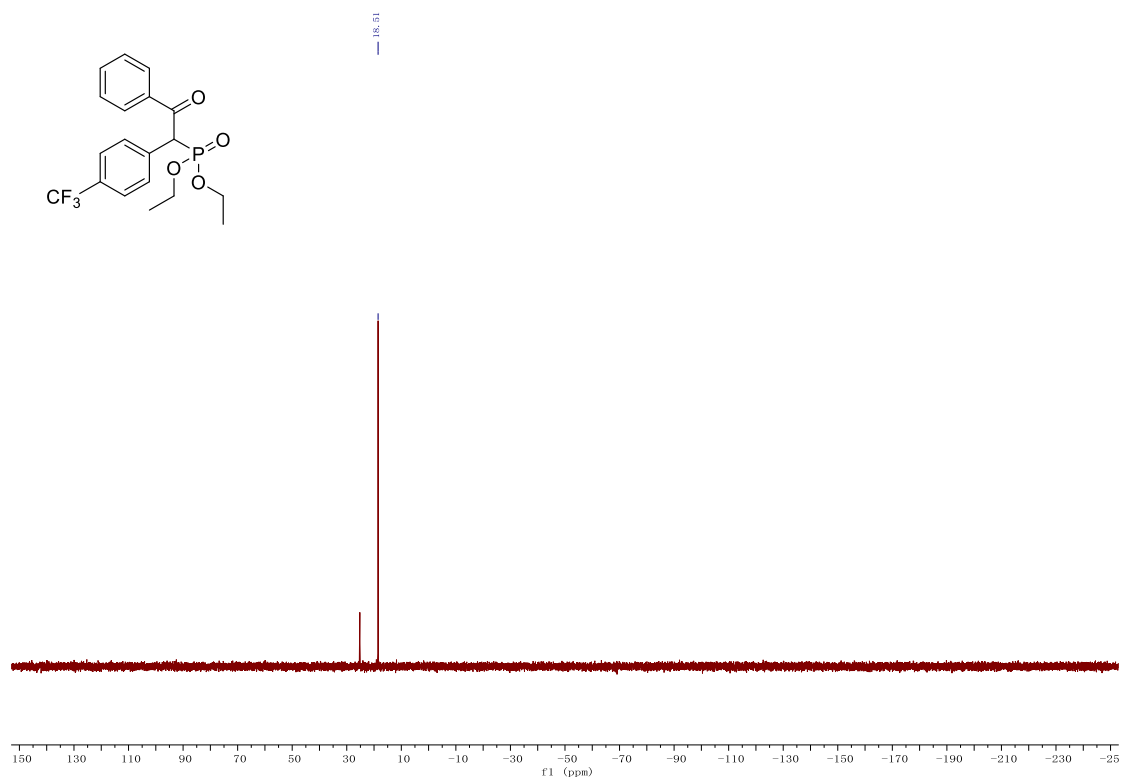

Figure S155.  $^{31}\text{P}$  NMR (162 MHz,  $\text{CDCl}_3$ ) spectrum of 4d

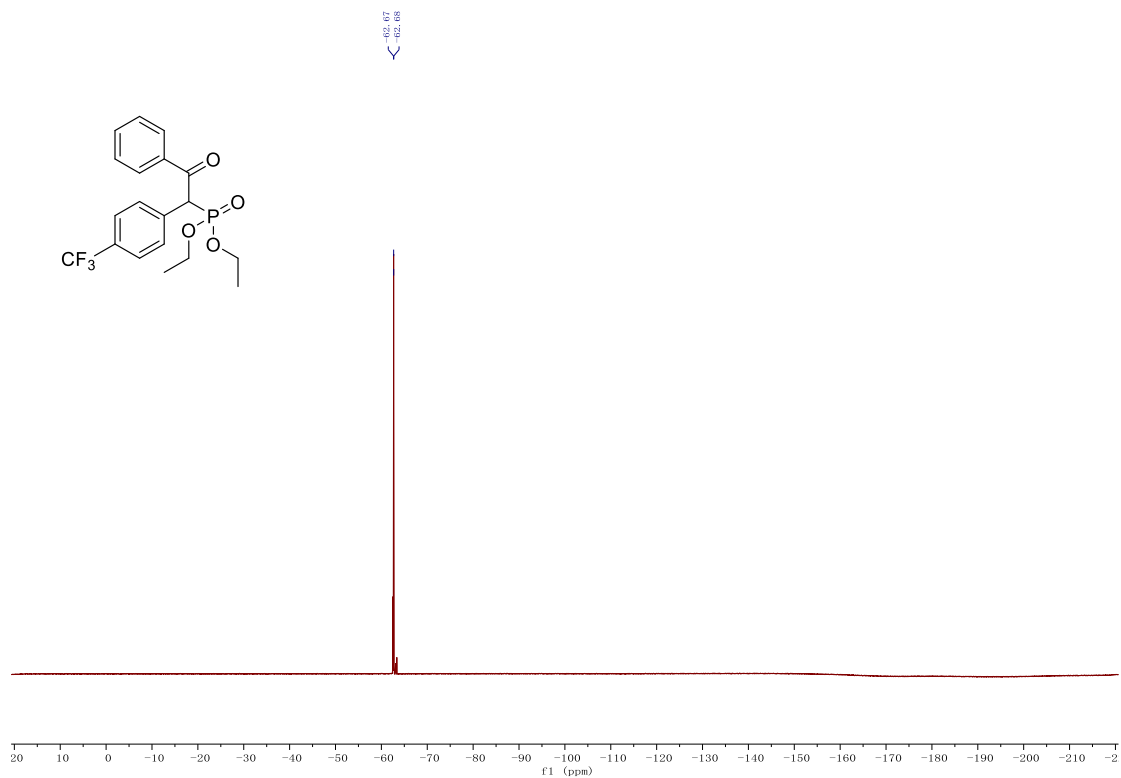

Figure S156.  $^{19}\text{F}$  NMR (377 MHz,  $\text{CDCl}_3$ ) spectrum of 4d

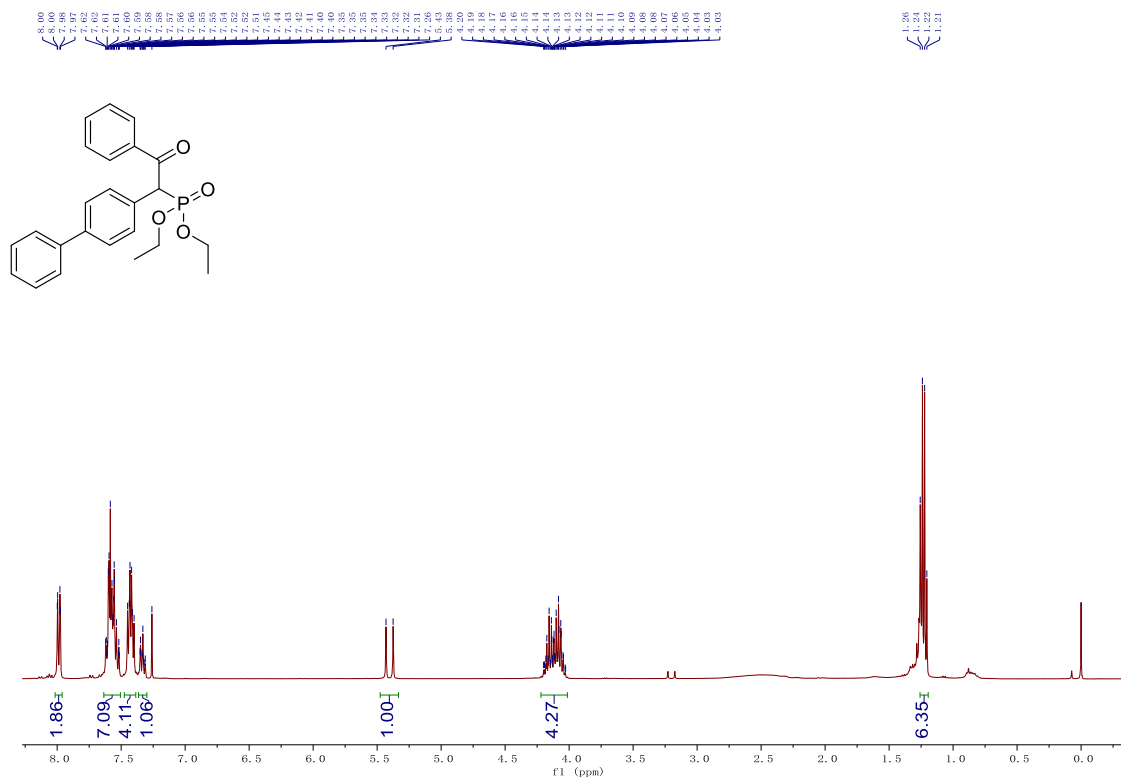

Figure S157. <sup>1</sup>H NMR (400 MHz, CDCl<sub>3</sub>) spectrum of 4e

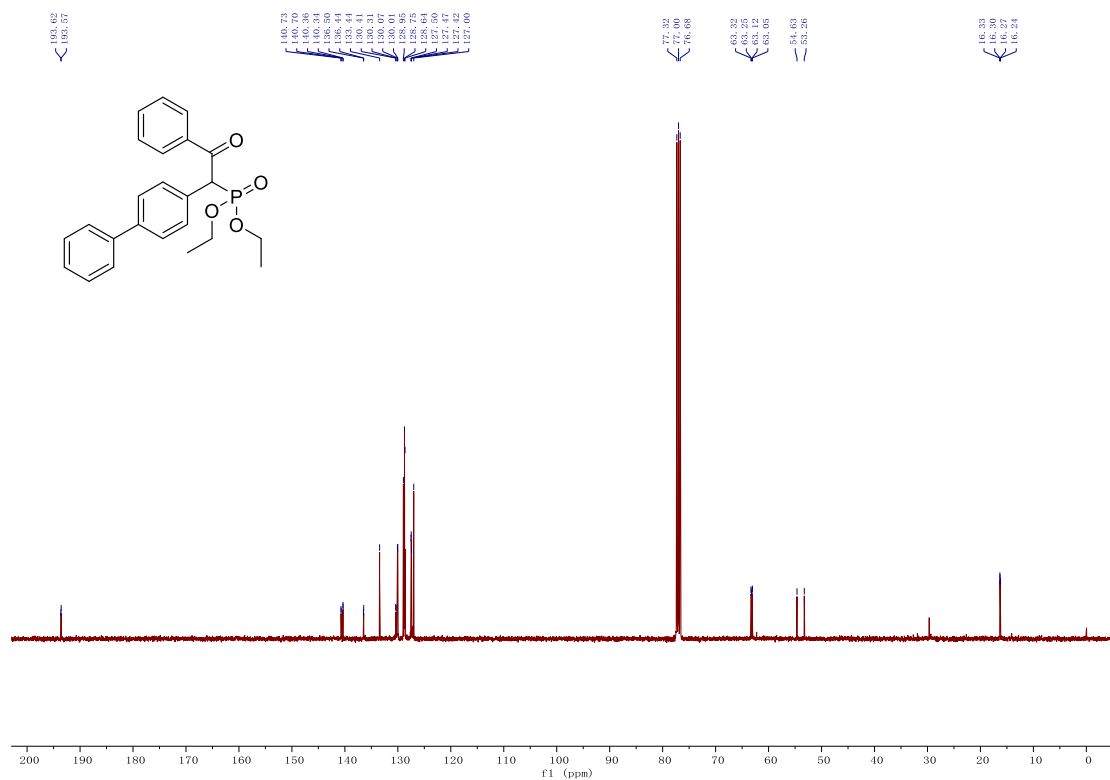

Figure S158. <sup>13</sup>C NMR (101 MHz, CDCl<sub>3</sub>) spectrum of 4e

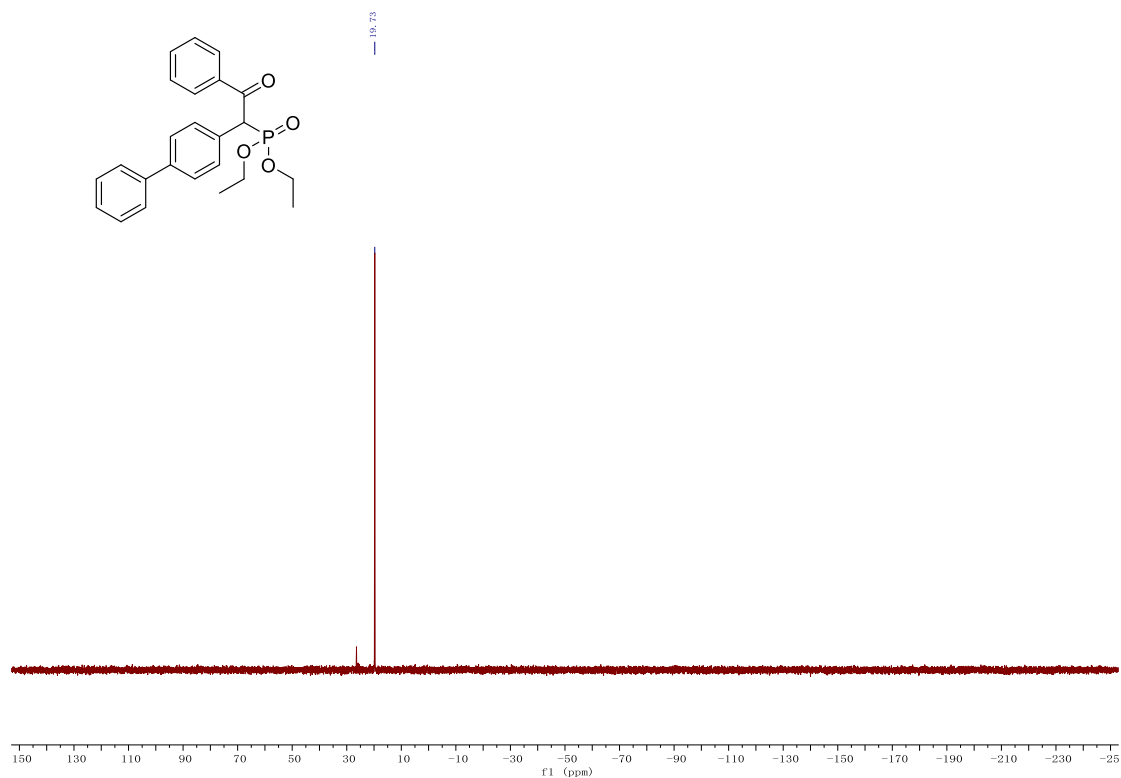

Figure S159.  $^{31}\text{P}$  NMR (162 MHz,  $\text{CDCl}_3$ ) spectrum of 4e

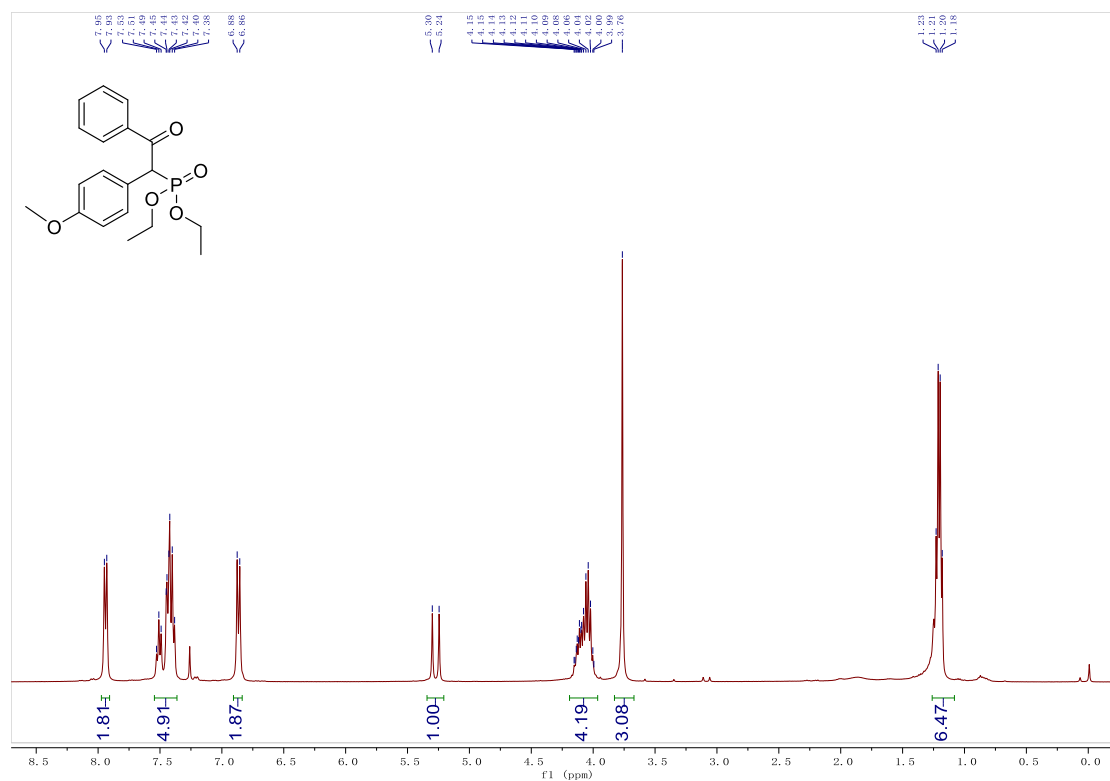

Figure S160.  $^1\text{H}$  NMR (400 MHz,  $\text{CDCl}_3$ ) spectrum of 4f

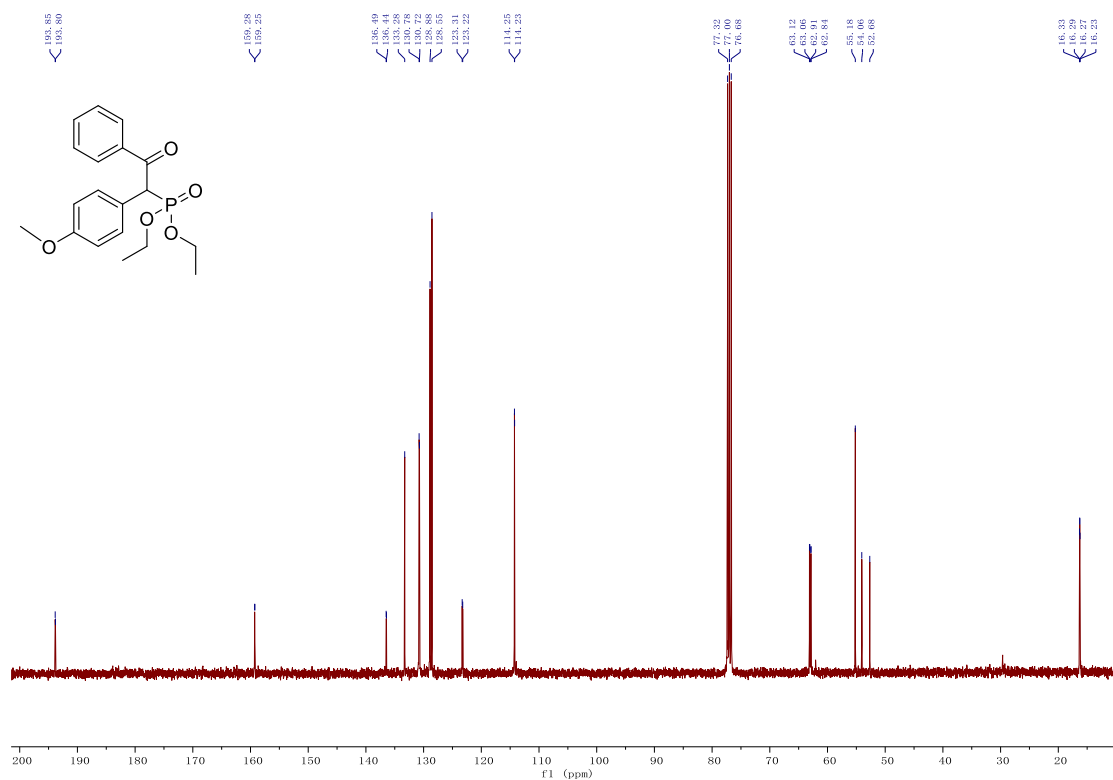

Figure S161.  $^{13}\text{C}$  NMR (101 MHz,  $\text{CDCl}_3$ ) spectrum of 4f

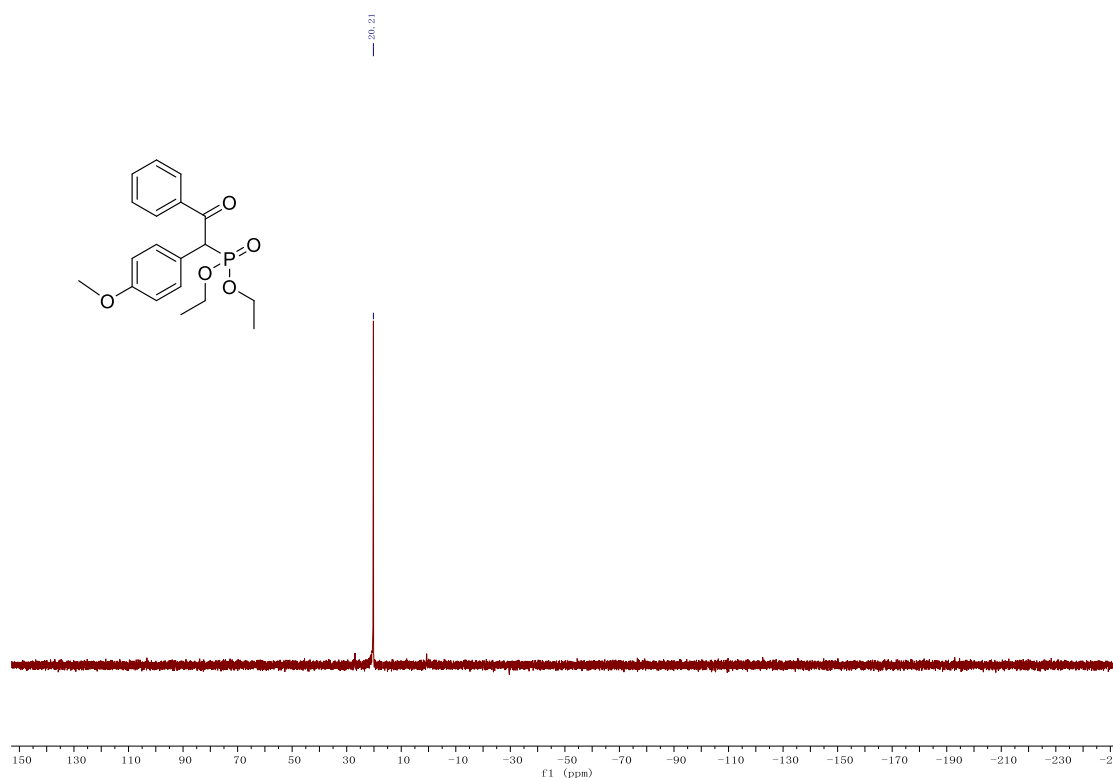

Figure S162.  $^{31}\text{P}$  NMR (162 MHz,  $\text{CDCl}_3$ ) spectrum of 4f

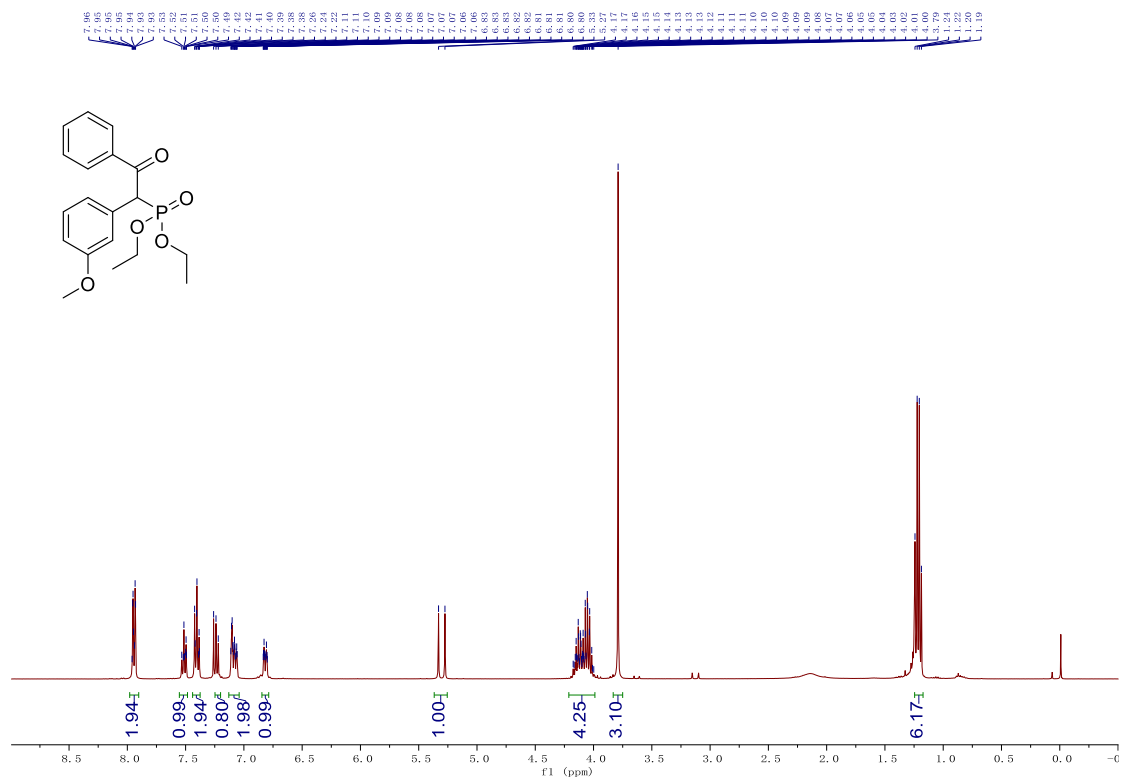

Figure S163. <sup>1</sup>H NMR (400 MHz, CDCl<sub>3</sub>) spectrum of 4g

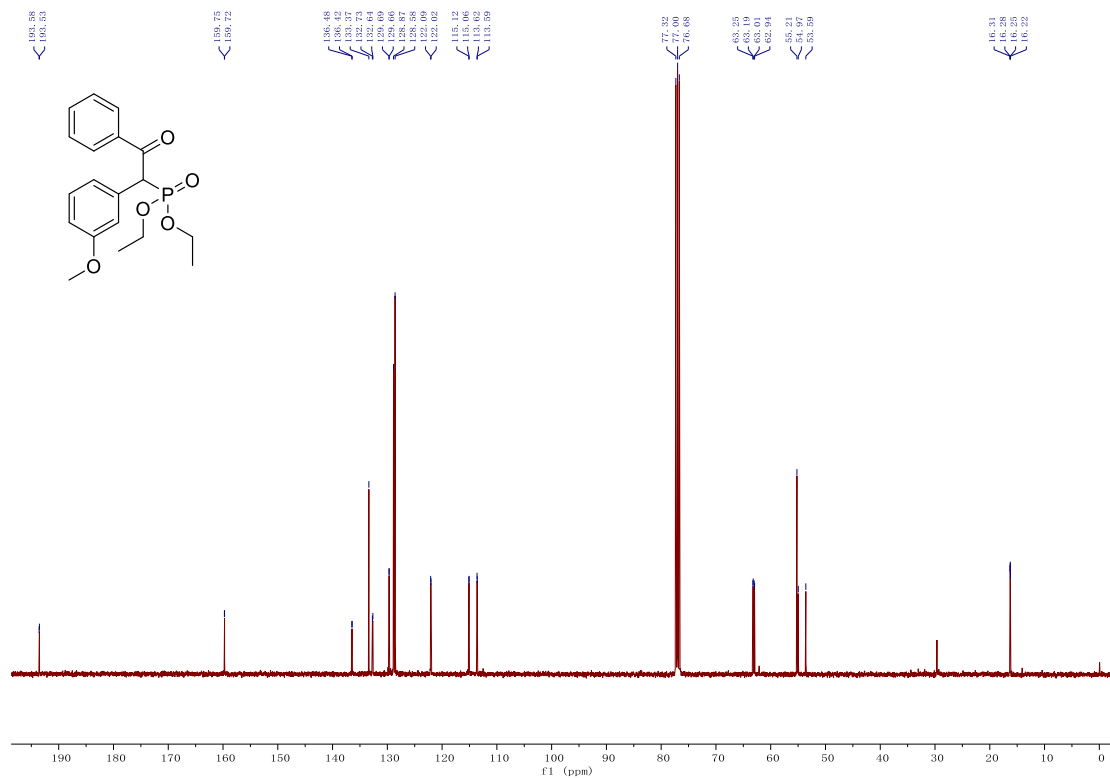

Figure S164. <sup>13</sup>C NMR (101 MHz, CDCl<sub>3</sub>) spectrum of 4g

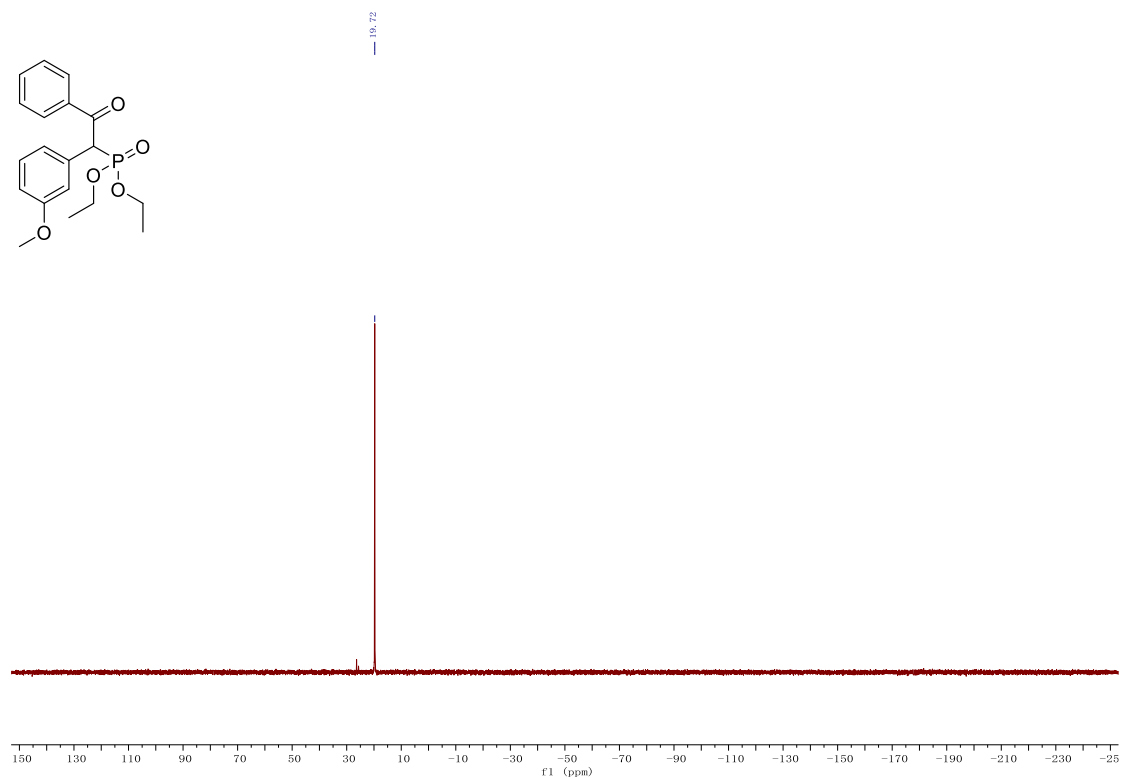

Figure S165.  $^{31}\text{P}$  NMR (162 MHz,  $\text{CDCl}_3$ ) spectrum of 4g

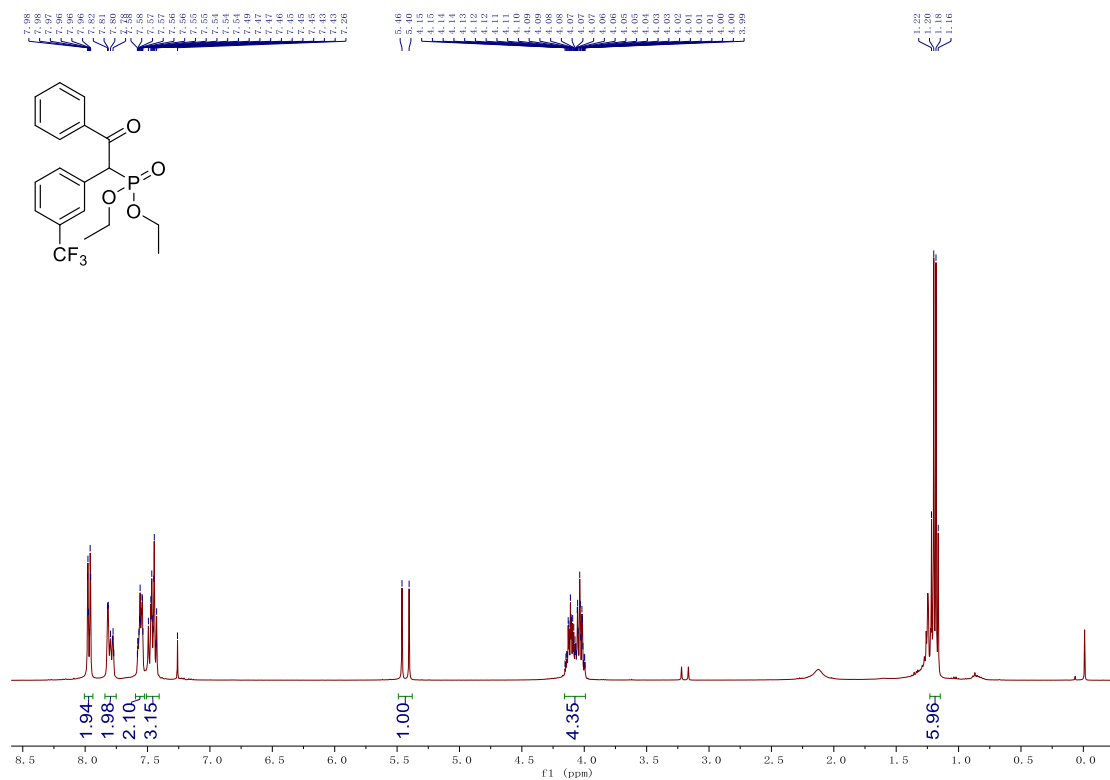

Figure S166.  $^1\text{H}$  NMR (400 MHz,  $\text{CDCl}_3$ ) spectrum of 4h

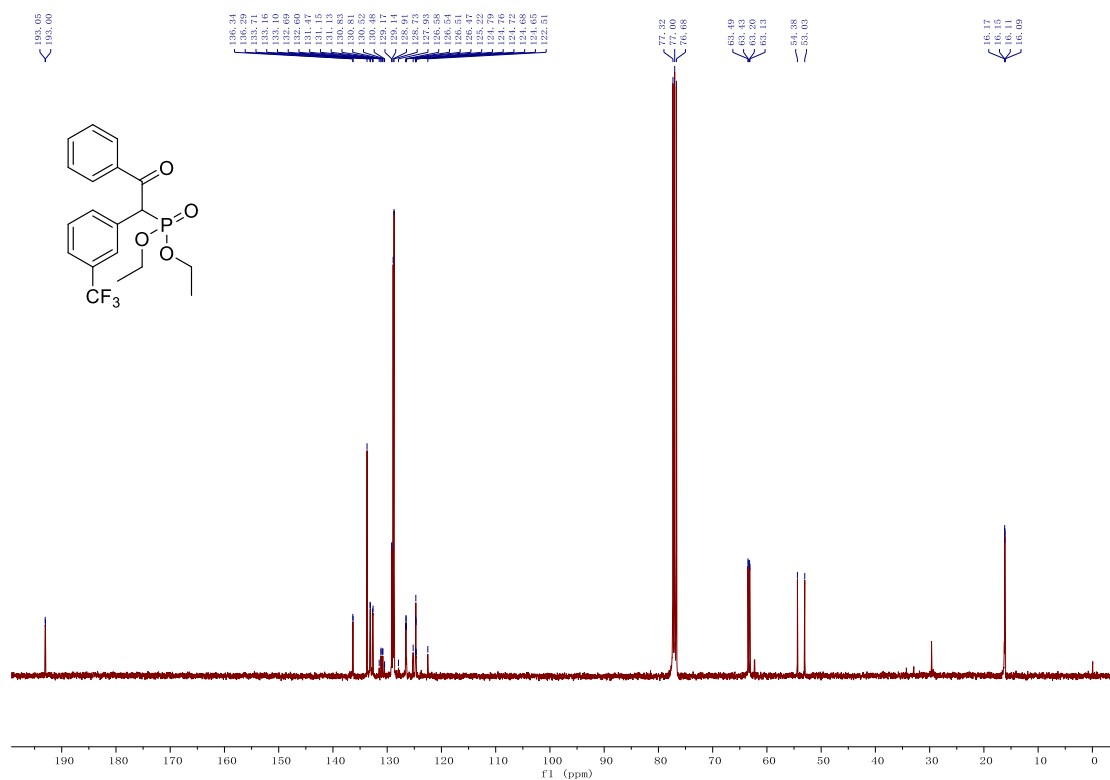

Figure S167. <sup>13</sup>C NMR (101 MHz, CDCl<sub>3</sub>) spectrum of 4h

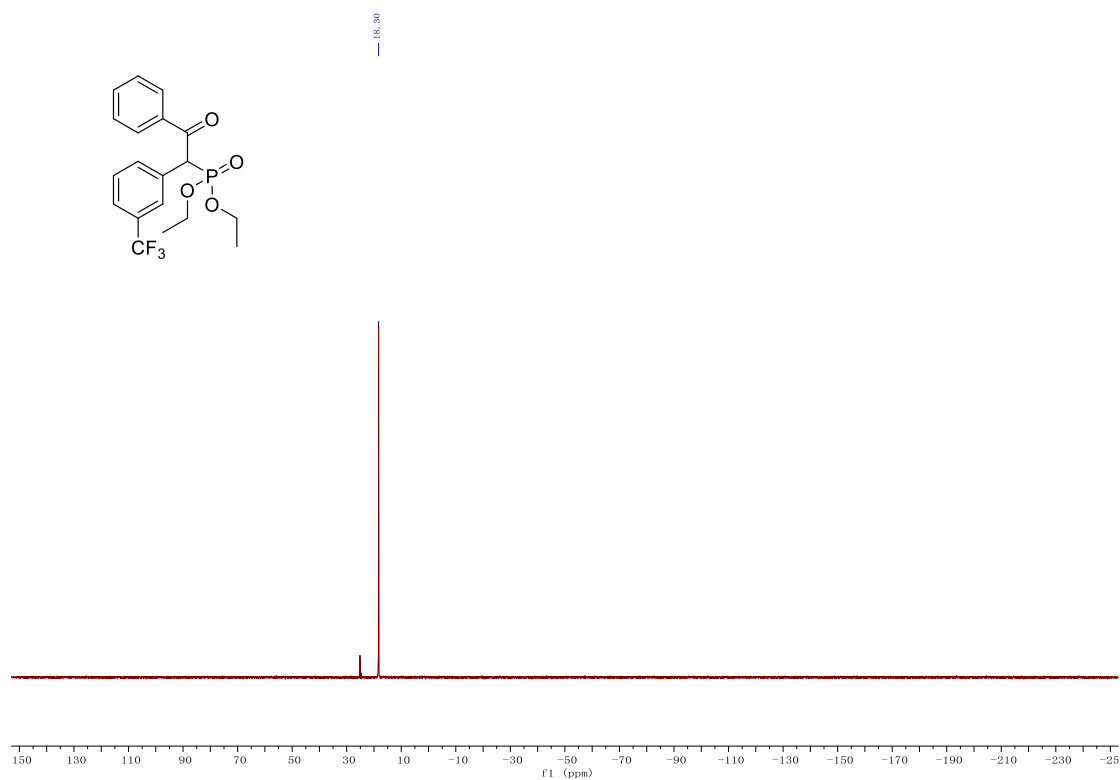

Figure S168. <sup>31</sup>P NMR (162 MHz, CDCl<sub>3</sub>) spectrum of 4h

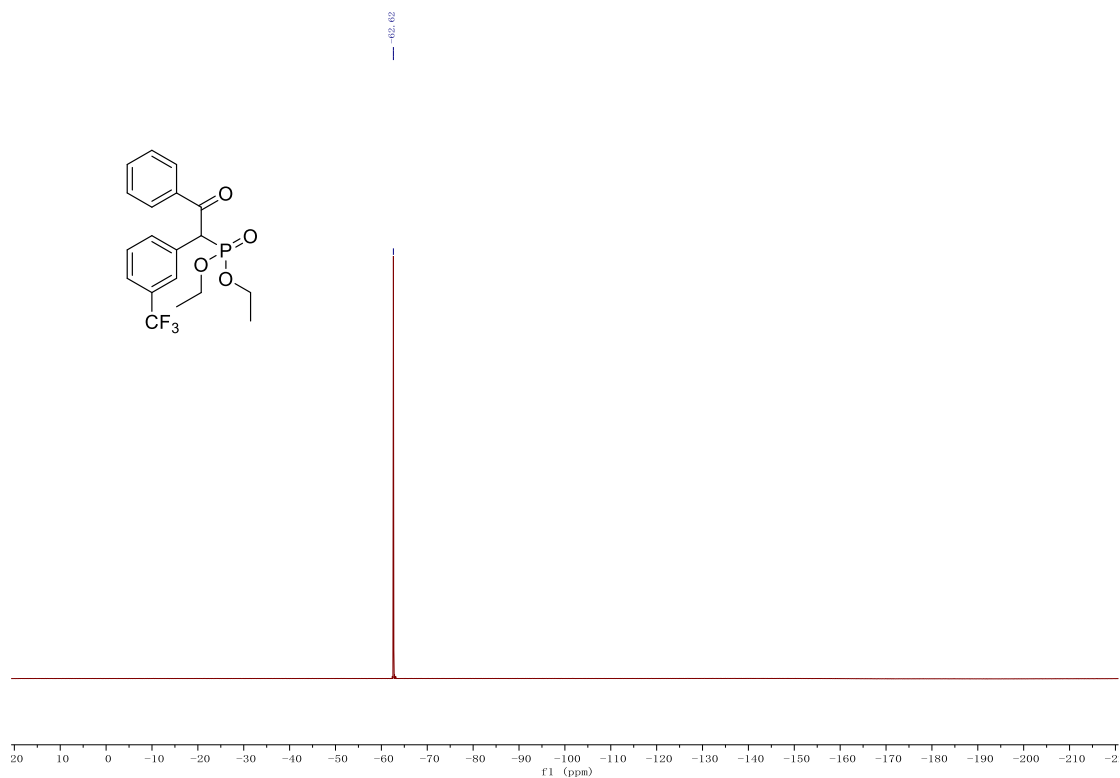

Figure S169.  $^{19}\text{F}$  NMR (377 MHz,  $\text{CDCl}_3$ ) spectrum of 4h

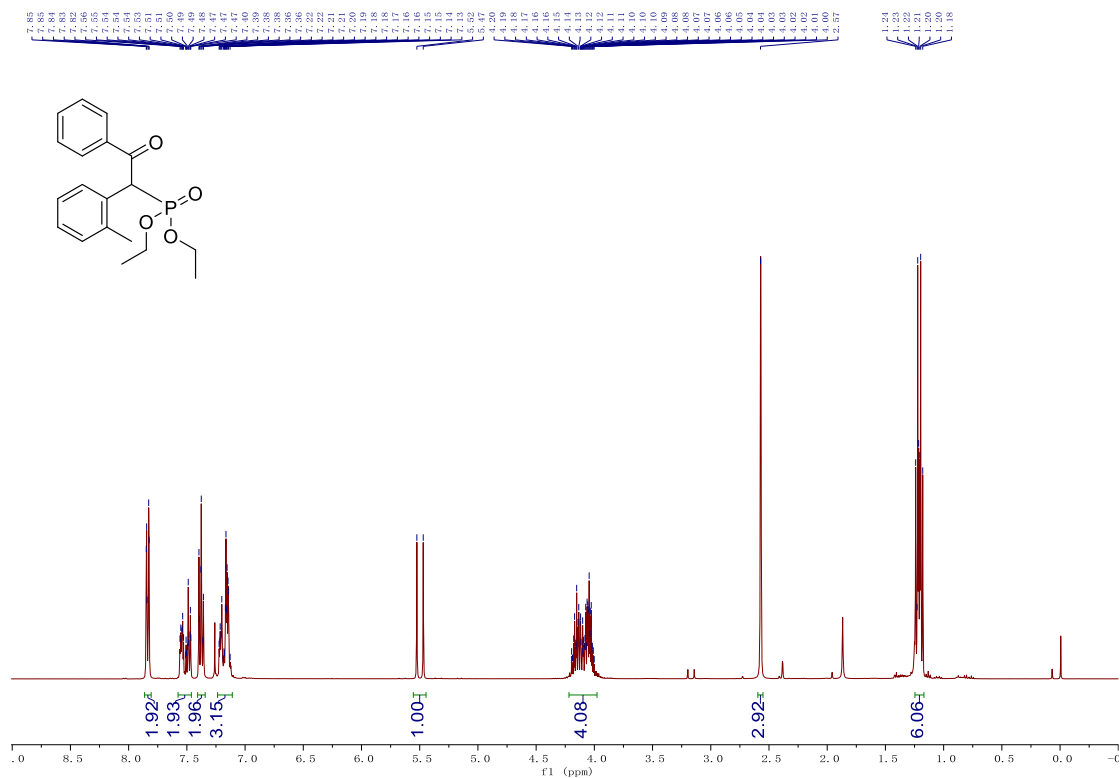

Figure S170.  $^1\text{H}$  NMR (400 MHz,  $\text{CDCl}_3$ ) spectrum of 4i

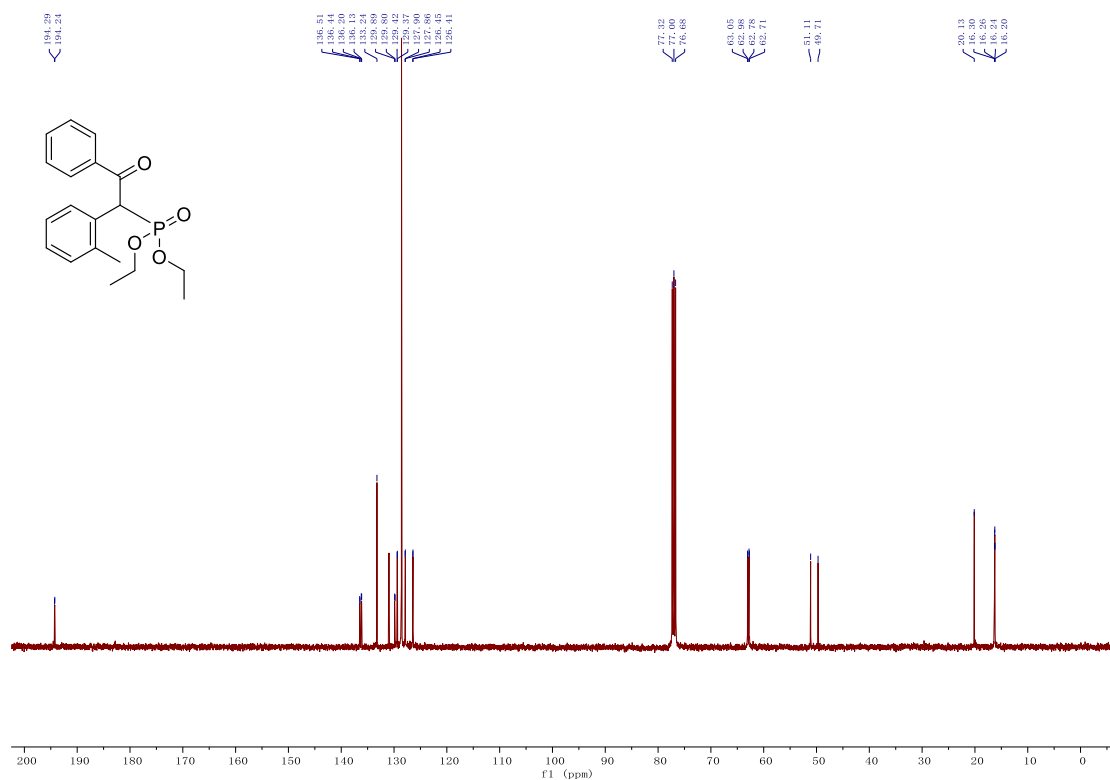

Figure S171. <sup>13</sup>C NMR (101 MHz, CDCl<sub>3</sub>) spectrum of 4i

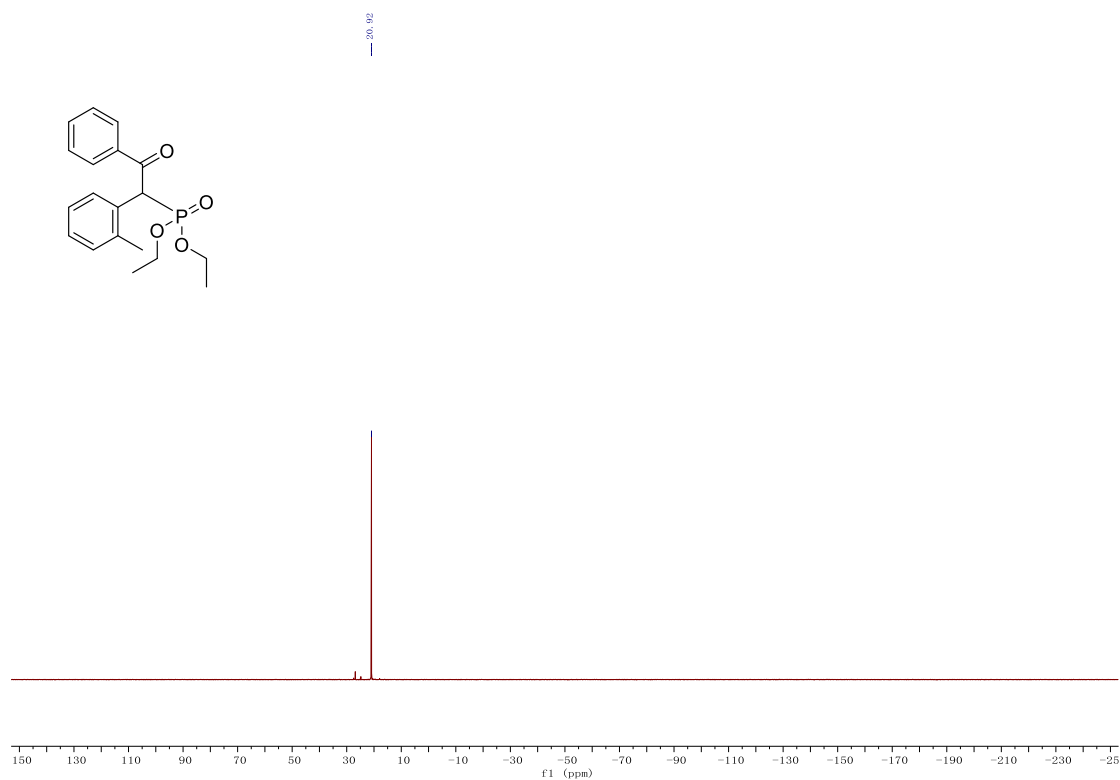

Figure S172. <sup>31</sup>P NMR (162 MHz, CDCl<sub>3</sub>) spectrum of 4i

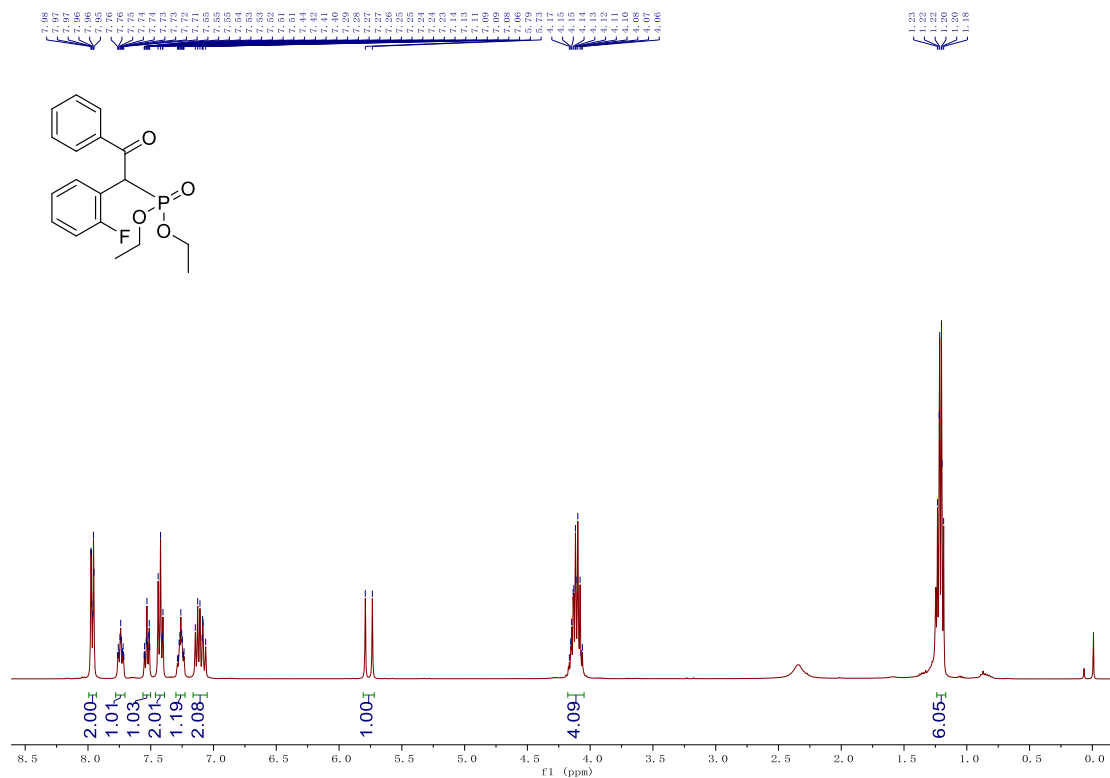

Figure S173. <sup>1</sup>H NMR (400 MHz, CDCl<sub>3</sub>) spectrum of 4j

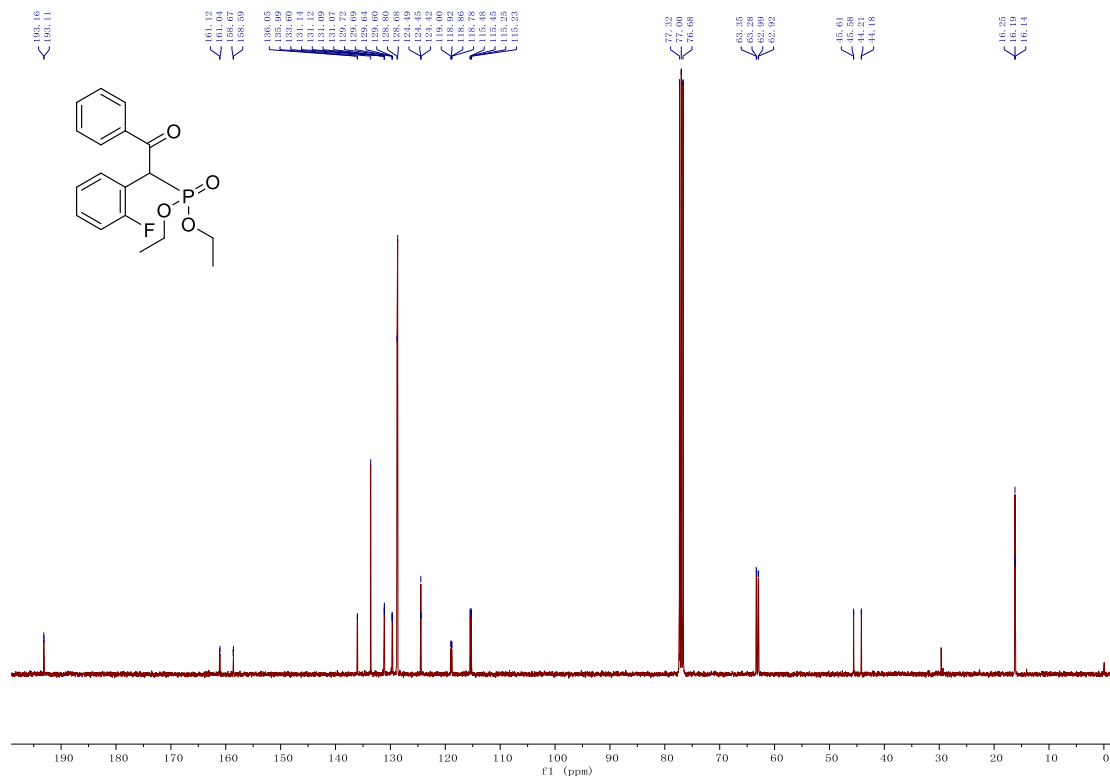

Figure S174. <sup>13</sup>C NMR (101 MHz, CDCl<sub>3</sub>) spectrum of 4j

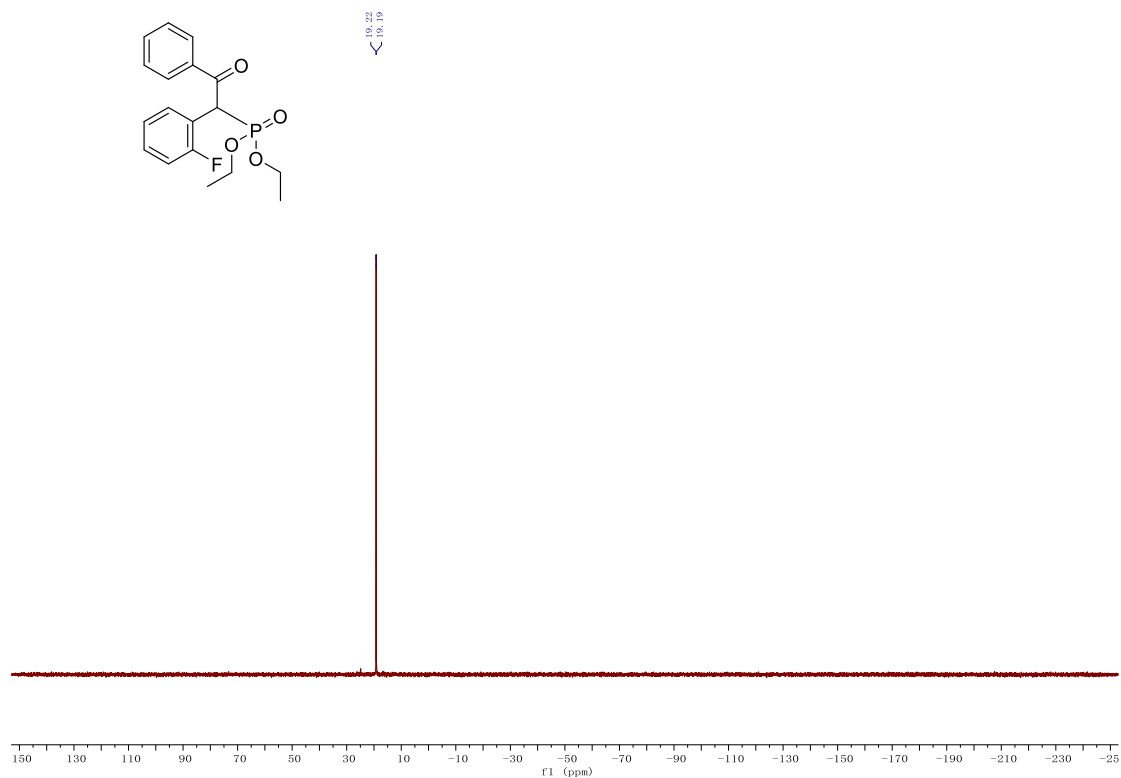

Figure S175.  $^{31}\text{P}$  NMR (162 MHz,  $\text{CDCl}_3$ ) spectrum of 4j

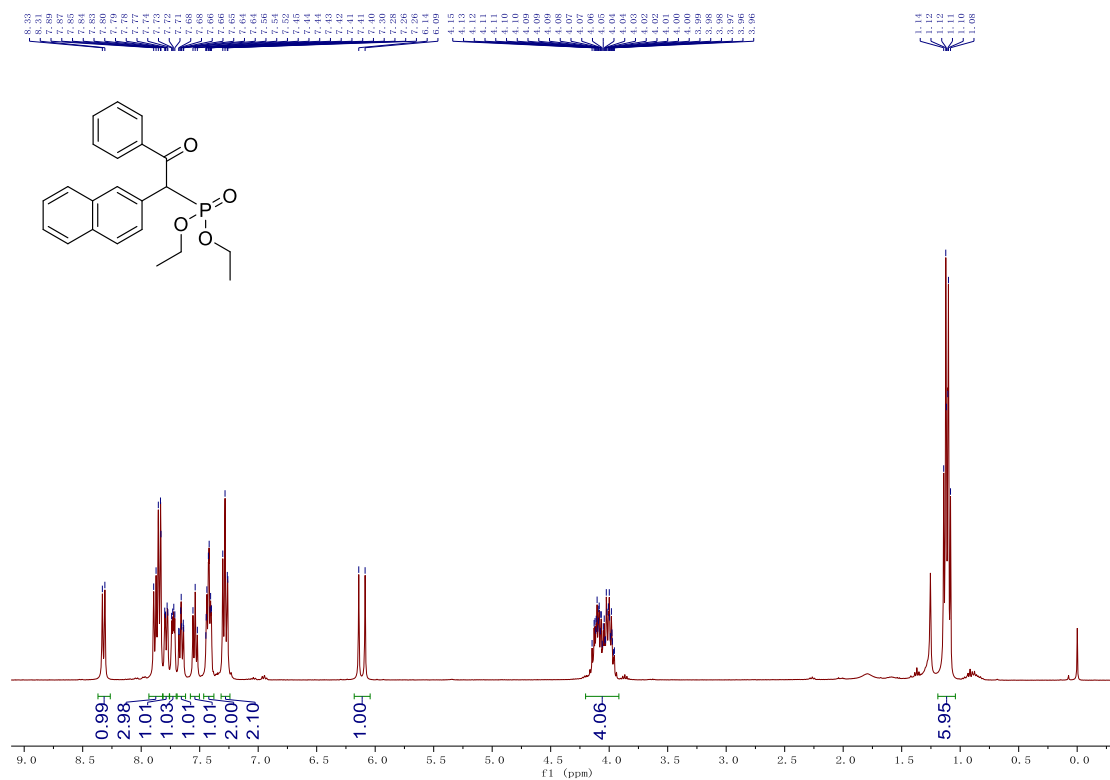

Figure S176.  $^1\text{H}$  NMR (400 MHz,  $\text{CDCl}_3$ ) spectrum of 4k

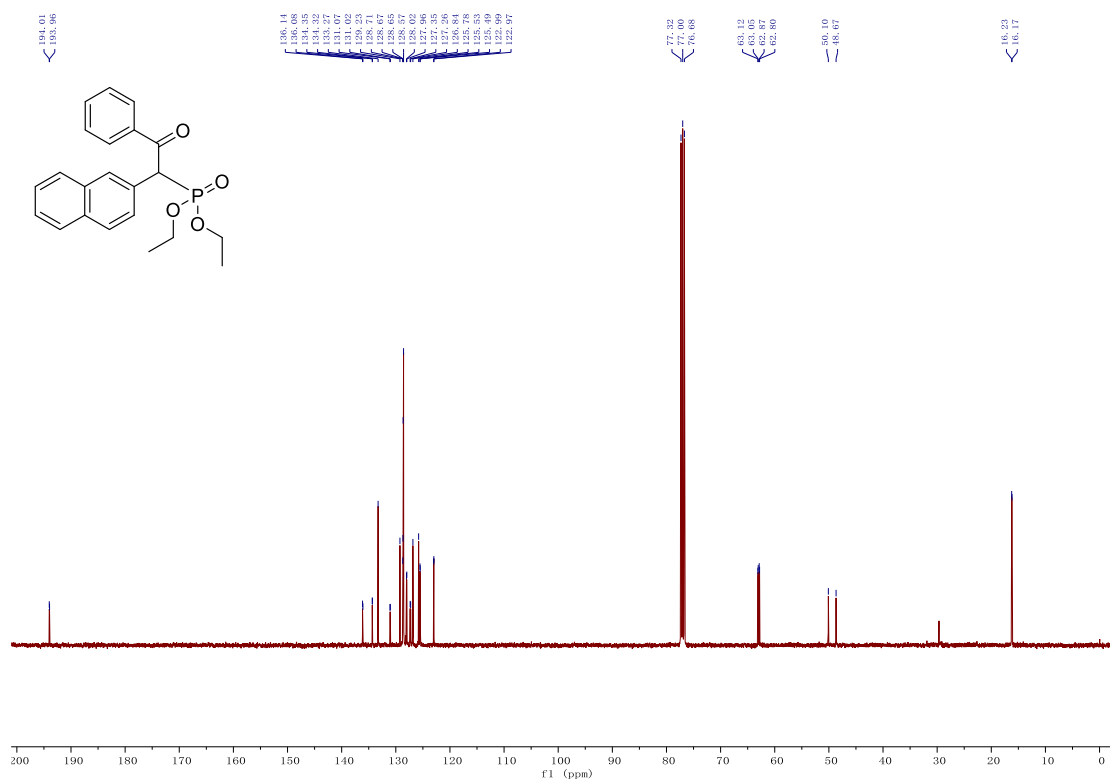

Figure S177. <sup>13</sup>C NMR (101 MHz, CDCl<sub>3</sub>) spectrum of 4k

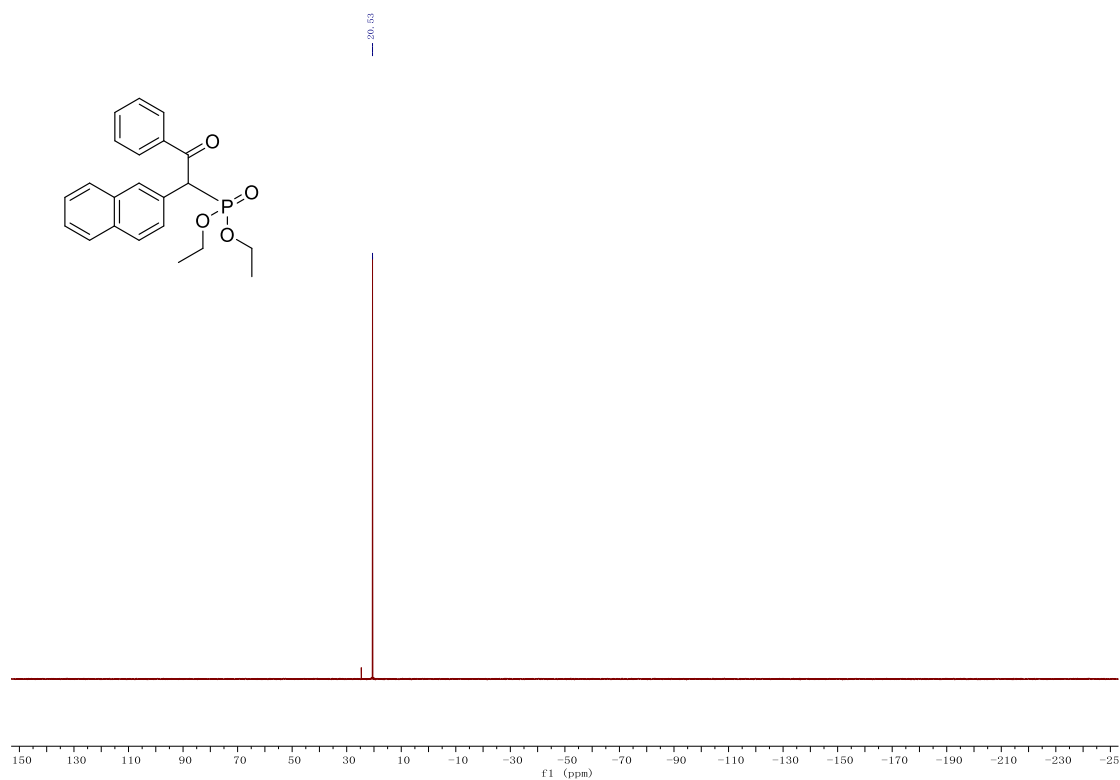

Figure S178. <sup>31</sup>P NMR (162 MHz, CDCl<sub>3</sub>) spectrum of 4k

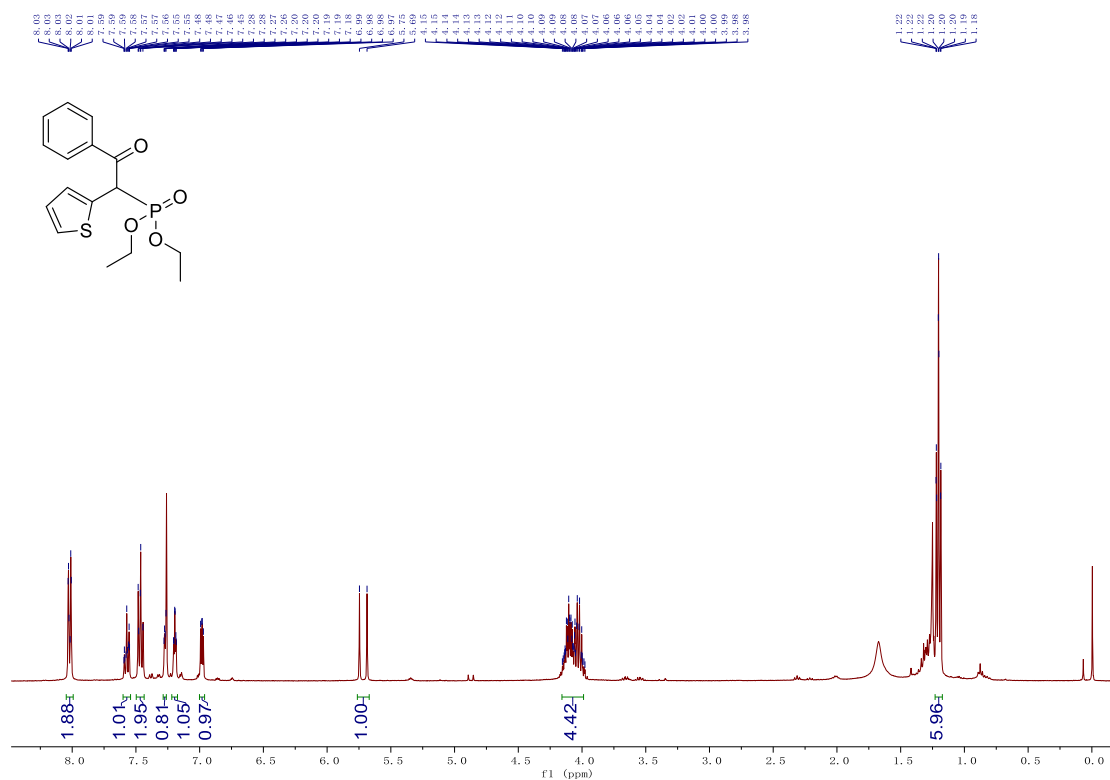

Figure S179. <sup>1</sup>H NMR (400 MHz, CDCl<sub>3</sub>) spectrum of 41

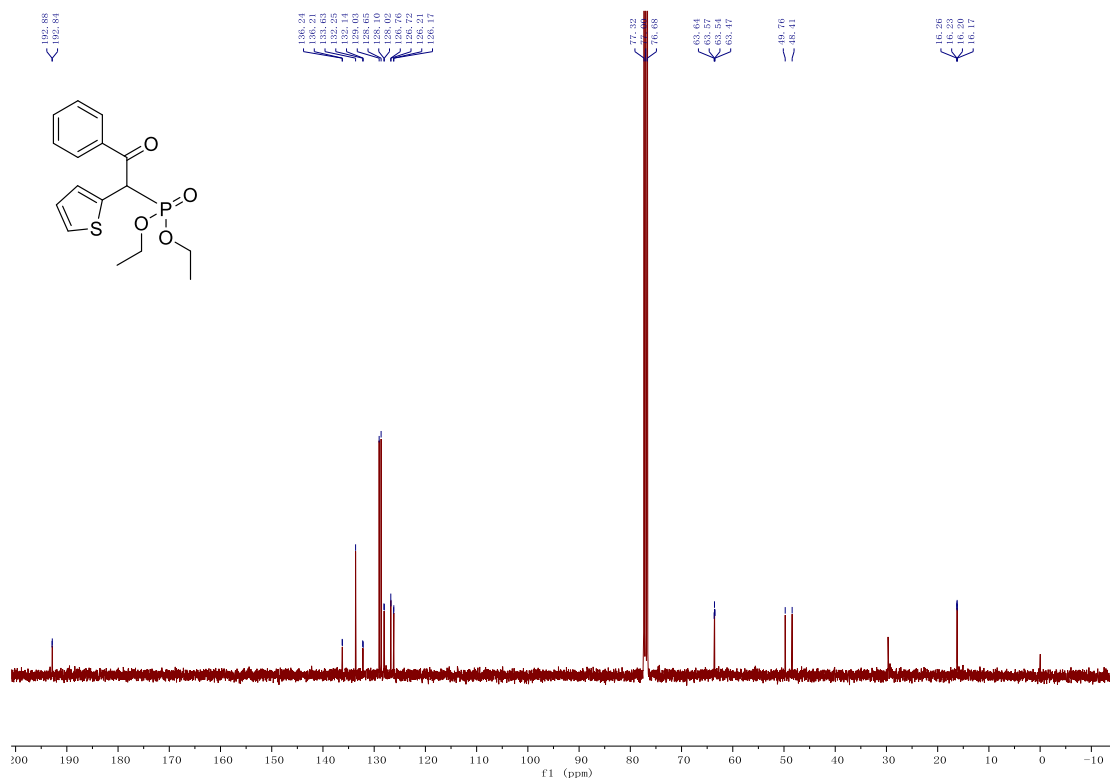

Figure S180. <sup>13</sup>C NMR (101 MHz, CDCl<sub>3</sub>) spectrum of 41

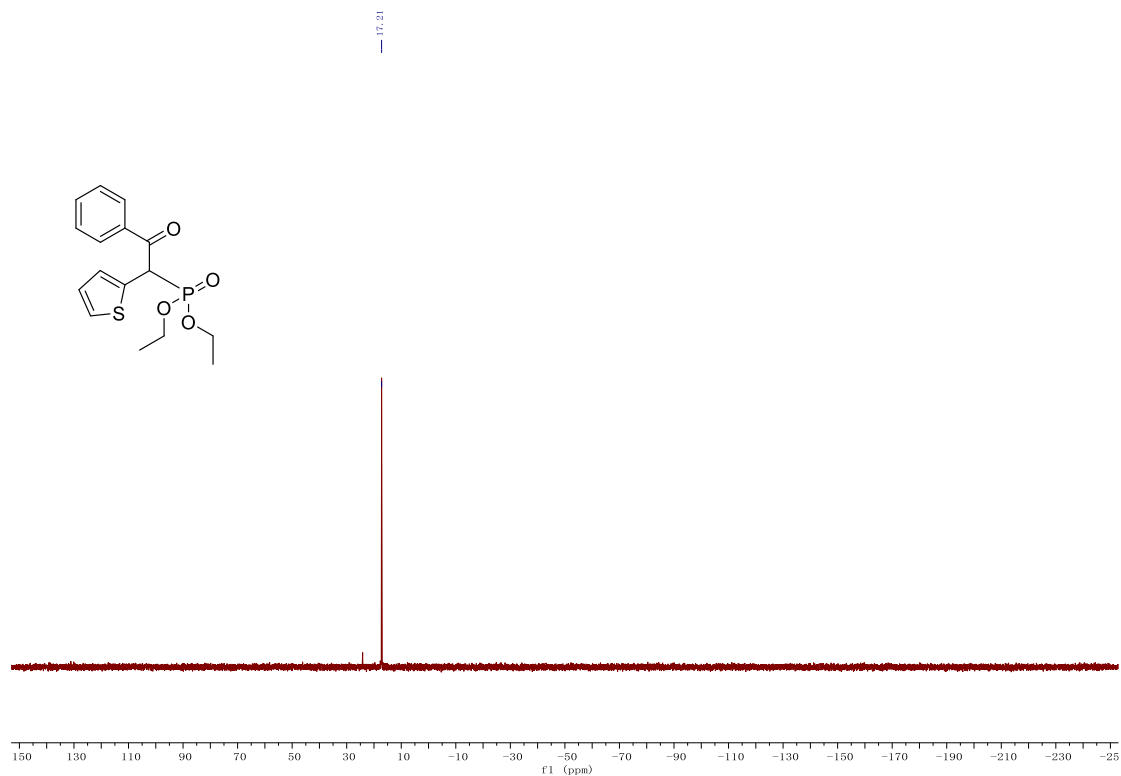

Figure S181.  $^{31}\text{P}$  NMR (162 MHz,  $\text{CDCl}_3$ ) spectrum of 4l

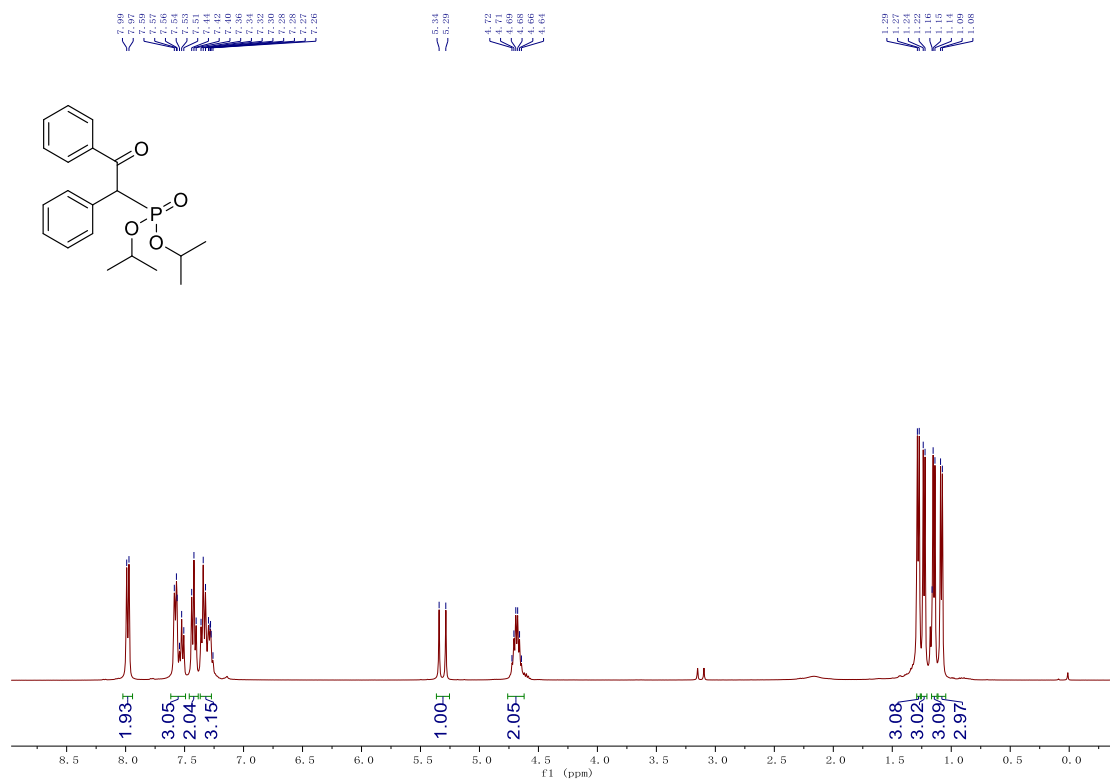

Figure S182.  $^1\text{H}$  NMR (400 MHz,  $\text{CDCl}_3$ ) spectrum of 4m

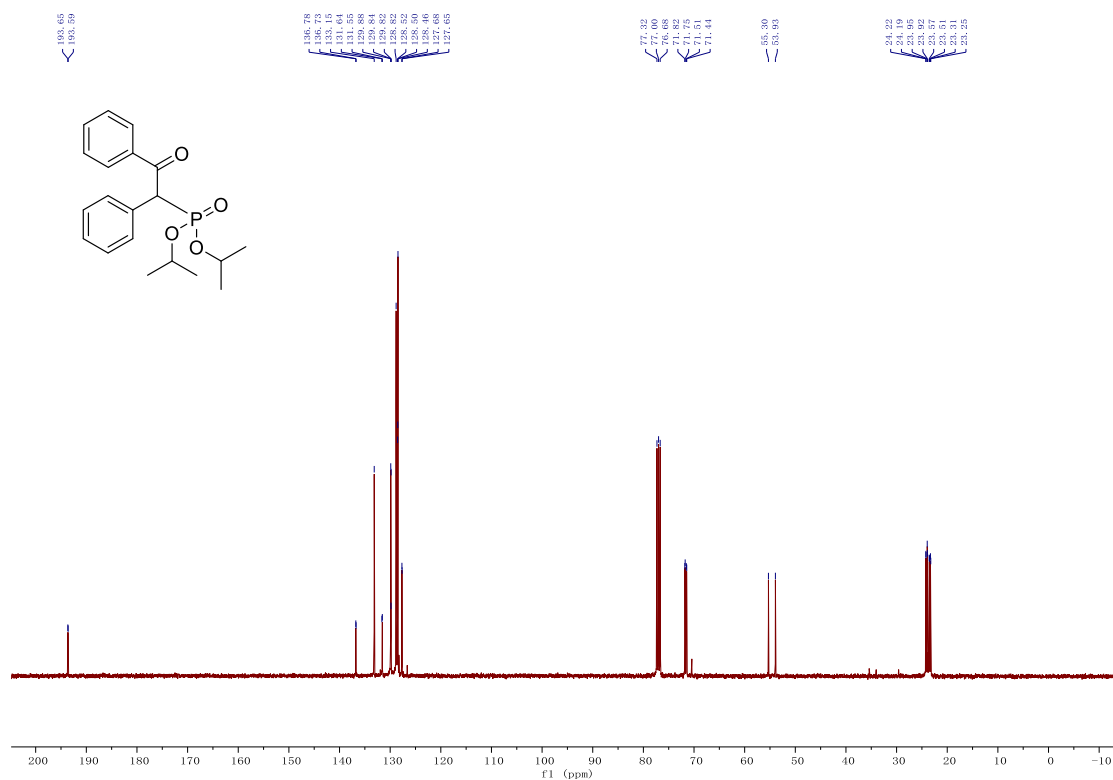

Figure S183. <sup>13</sup>C NMR (101 MHz, CDCl<sub>3</sub>) spectrum of 4m

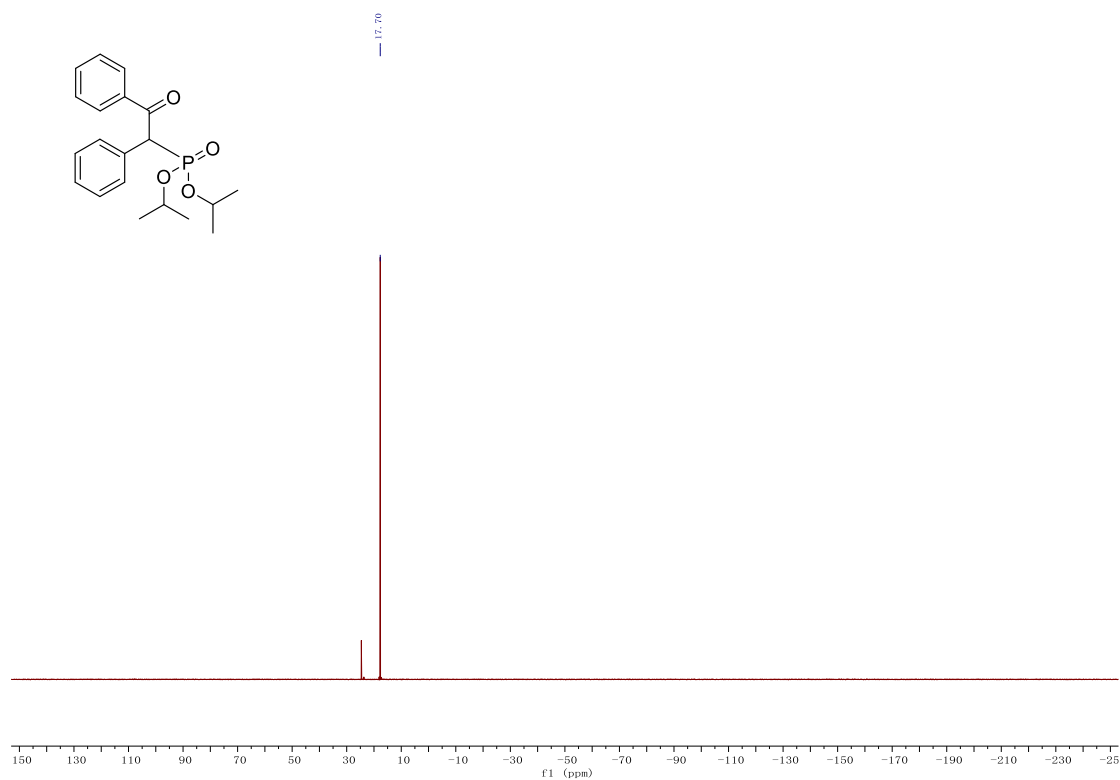

Figure S184. <sup>31</sup>P NMR (162 MHz, CDCl<sub>3</sub>) spectrum of 4m

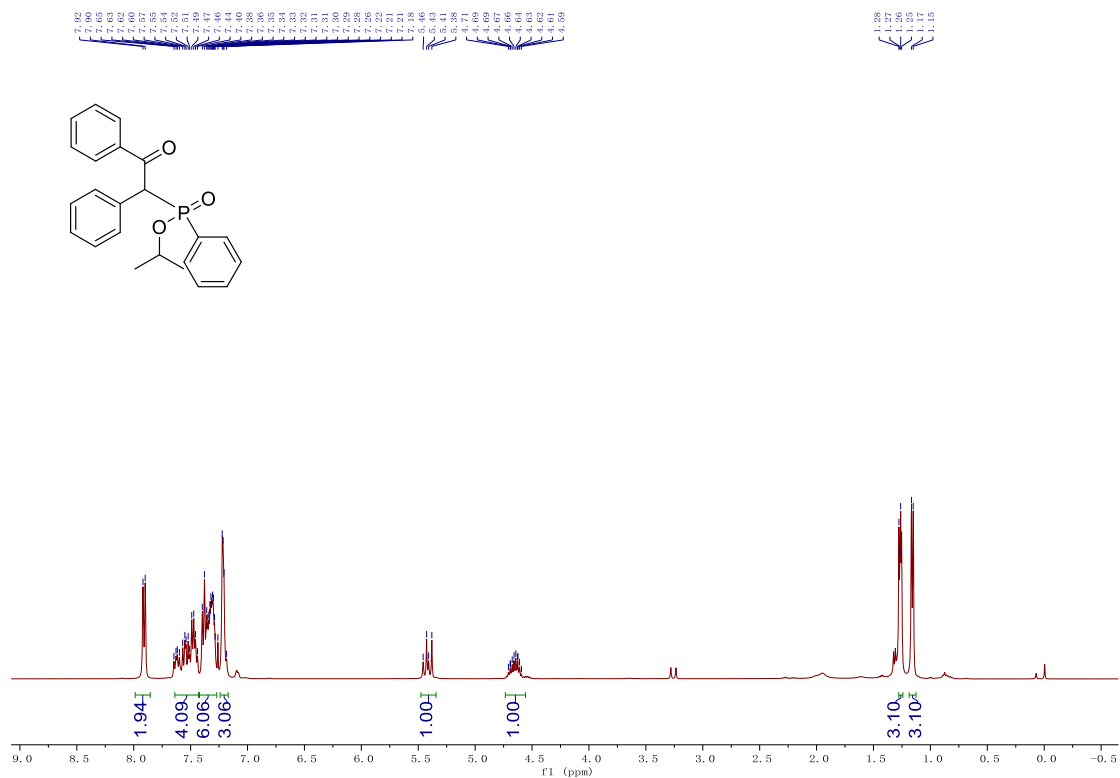

Figure S185. <sup>1</sup>H NMR (400 MHz, CDCl<sub>3</sub>) spectrum of 4n

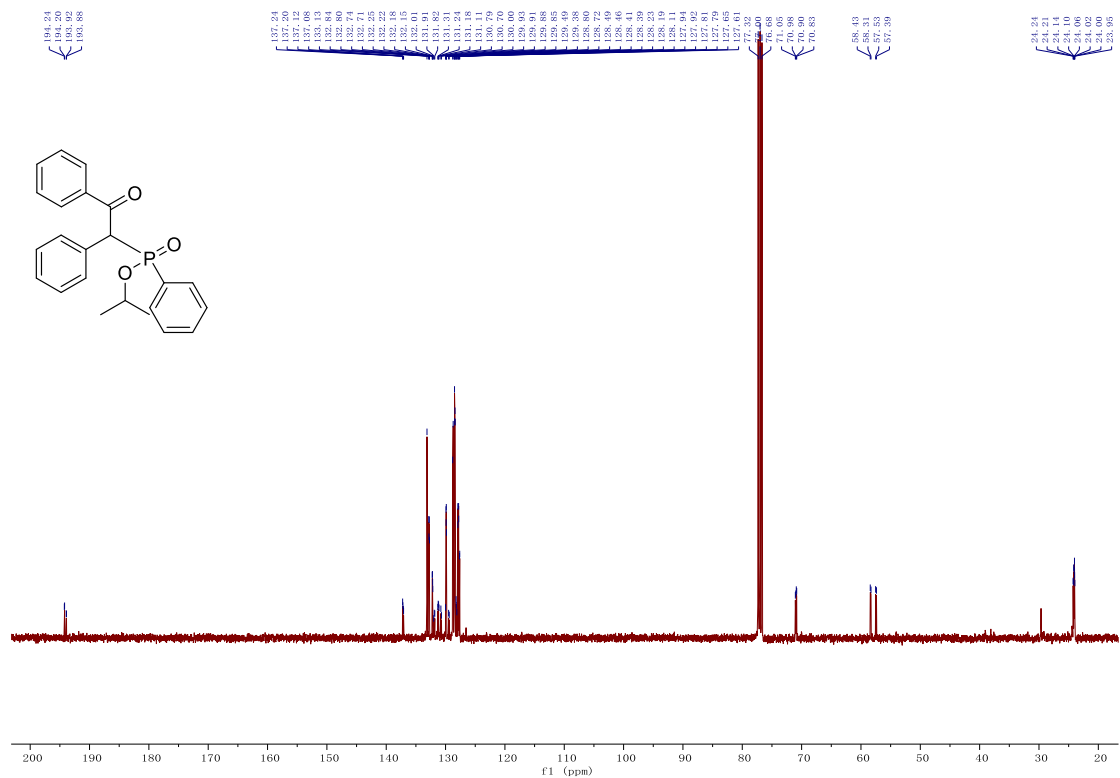

Figure S186. <sup>13</sup>C NMR (101 MHz, CDCl<sub>3</sub>) spectrum of 4n

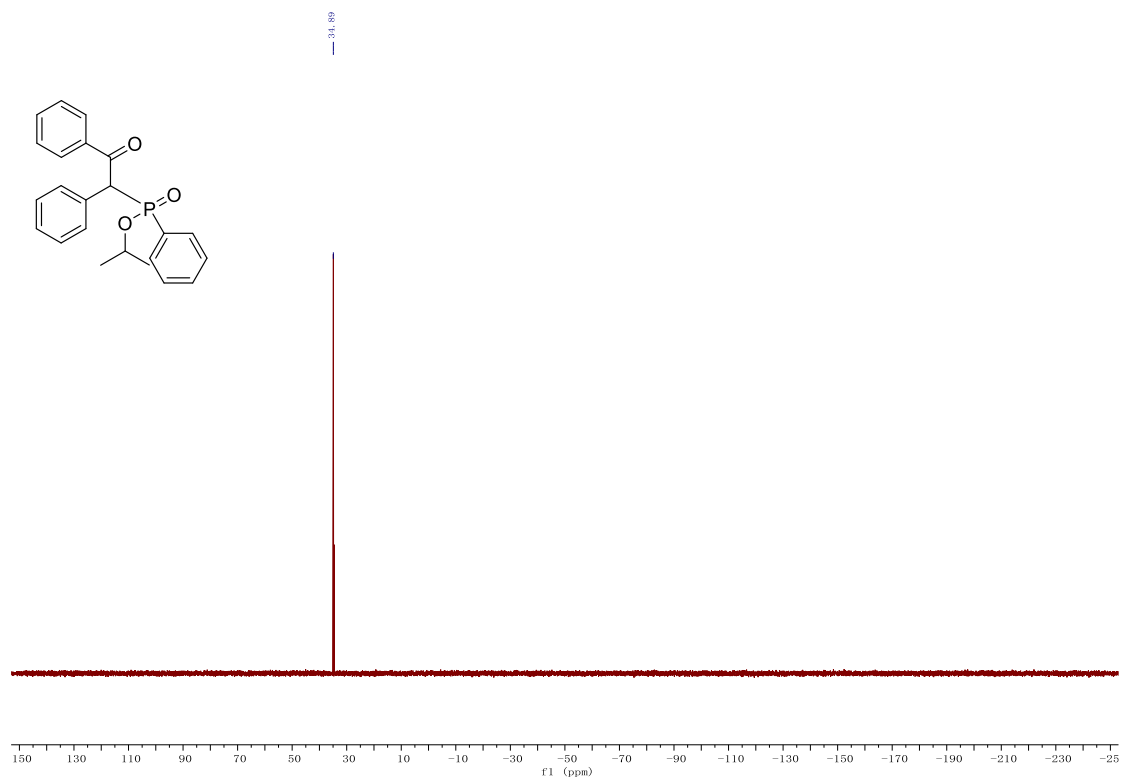

Figure S187.  $^{31}\text{P}$  NMR (162 MHz,  $\text{CDCl}_3$ ) spectrum of 4n

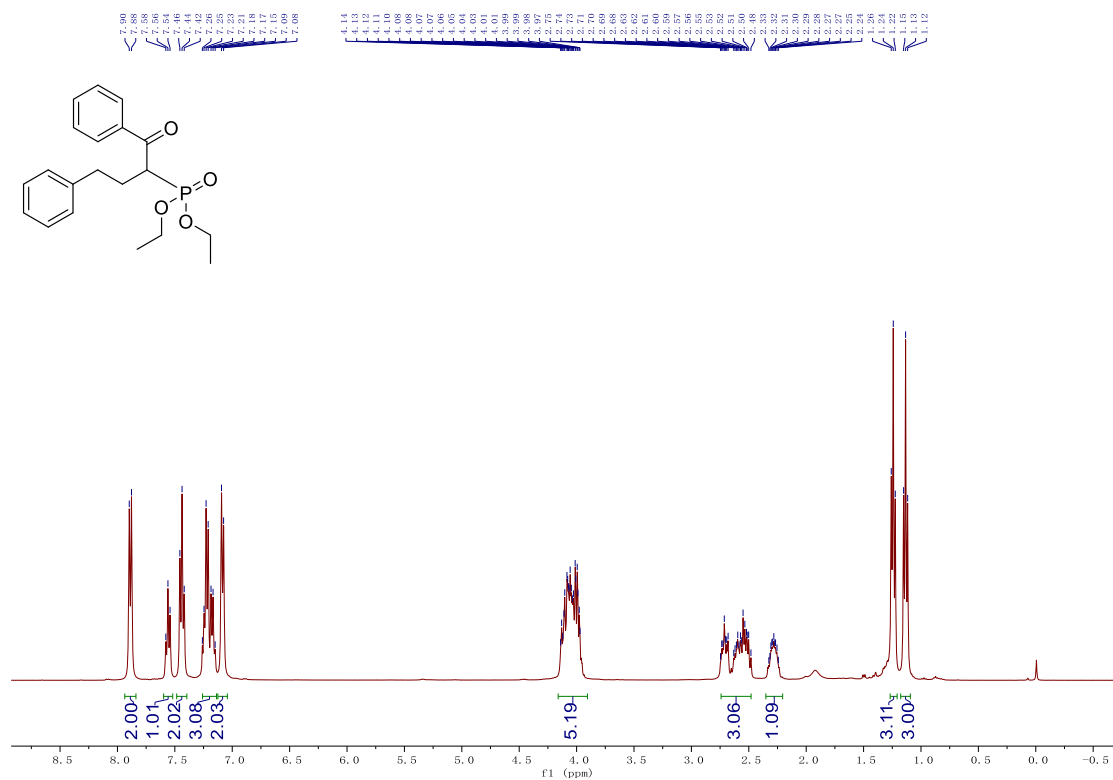

Figure S188.  $^1\text{H}$  NMR (400 MHz,  $\text{CDCl}_3$ ) spectrum of 4o

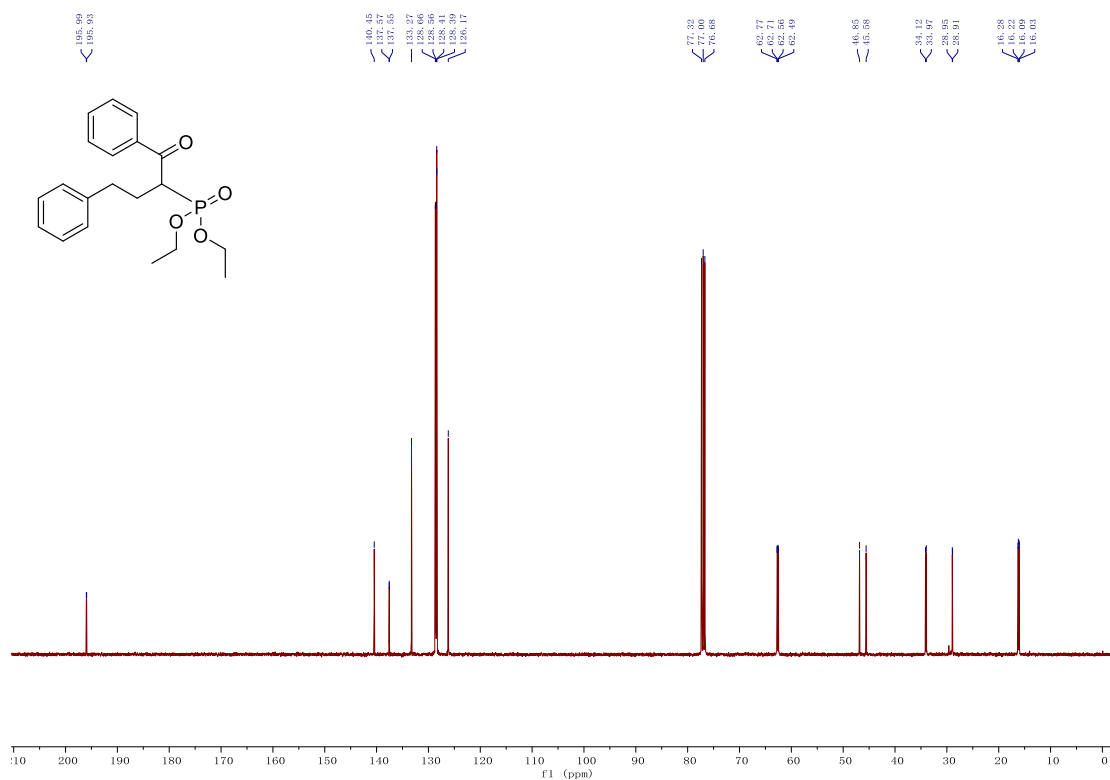

Figure S189.  $^{13}\text{C}$  NMR (101 MHz,  $\text{CDCl}_3$ ) spectrum of 4o

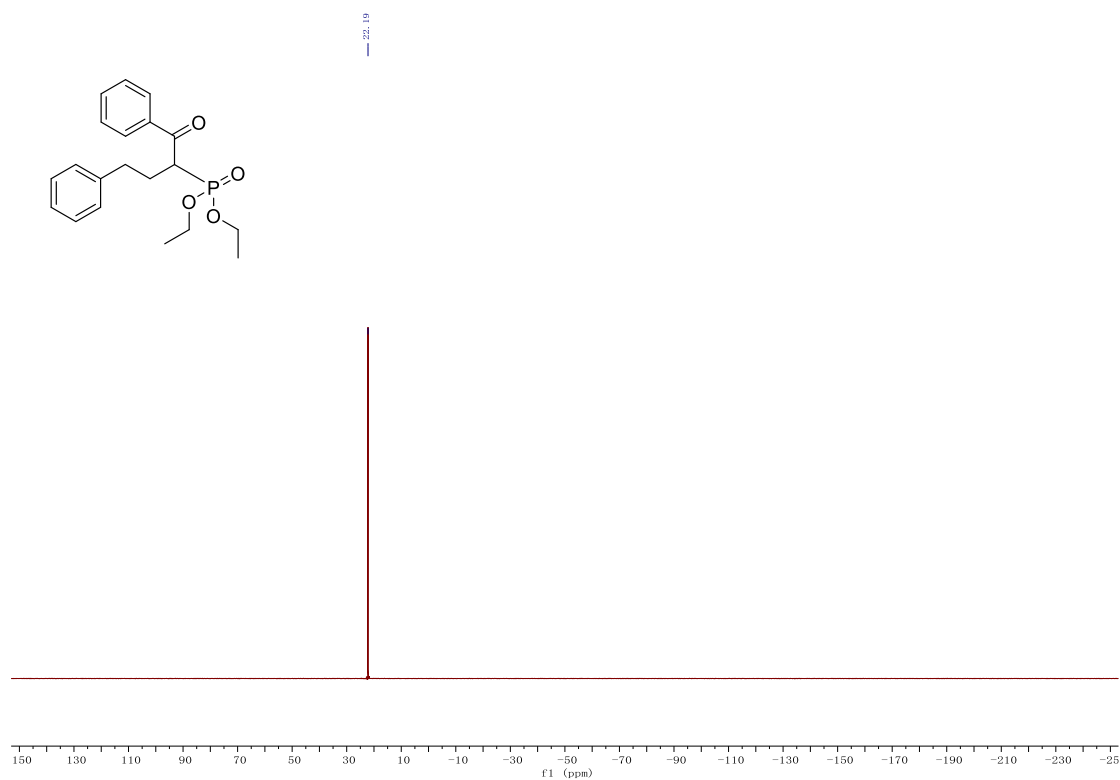

Figure S190.  $^{31}\text{P}$  NMR (162 MHz,  $\text{CDCl}_3$ ) spectrum of 4o

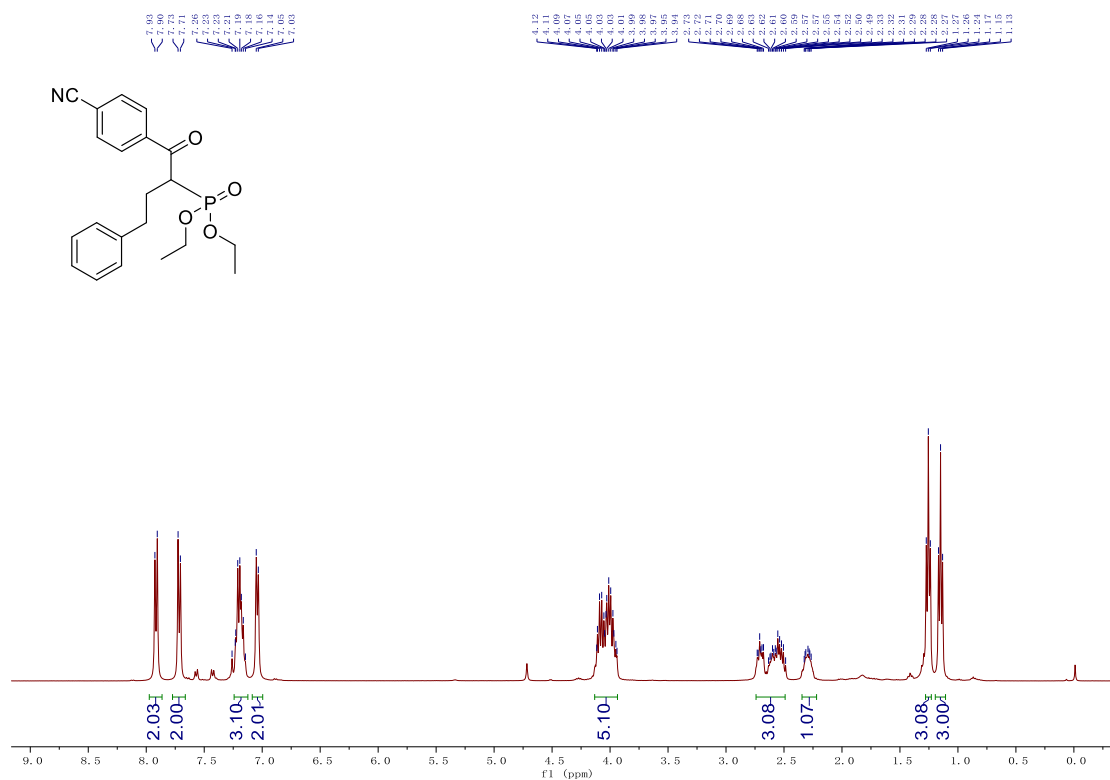

Figure S191. <sup>1</sup>H NMR (400 MHz, CDCl<sub>3</sub>) spectrum of 4p

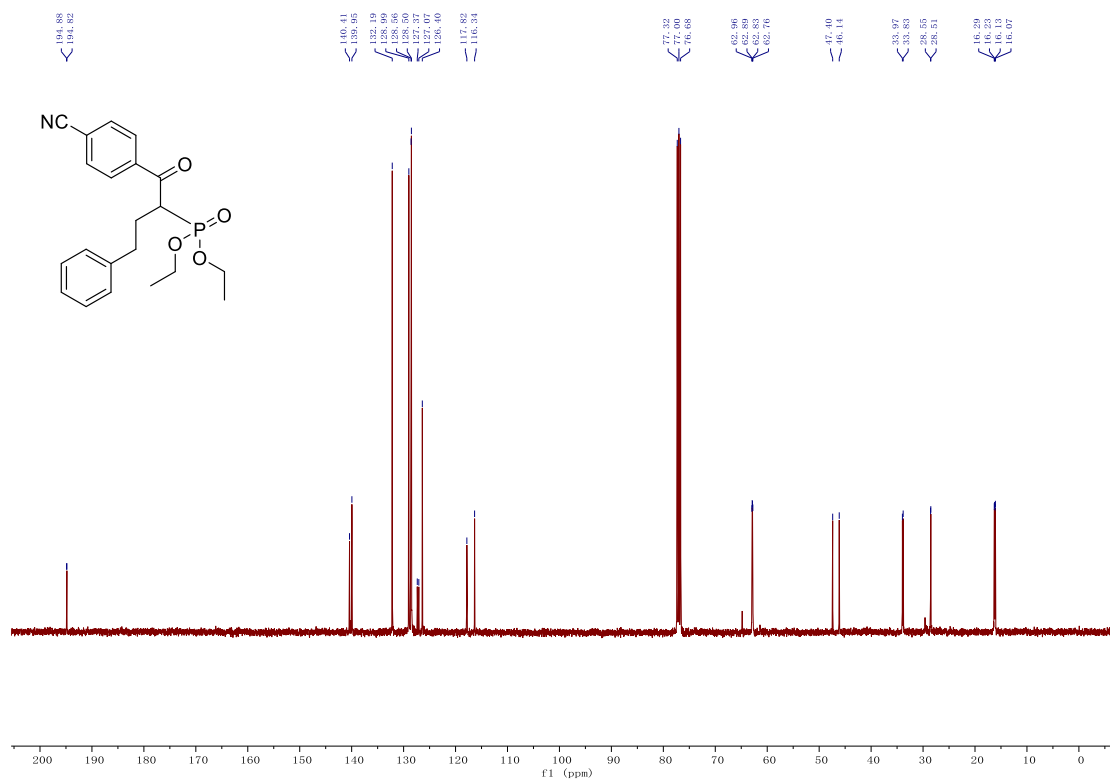

Figure S192. <sup>13</sup>C NMR (101 MHz, CDCl<sub>3</sub>) spectrum of 4p

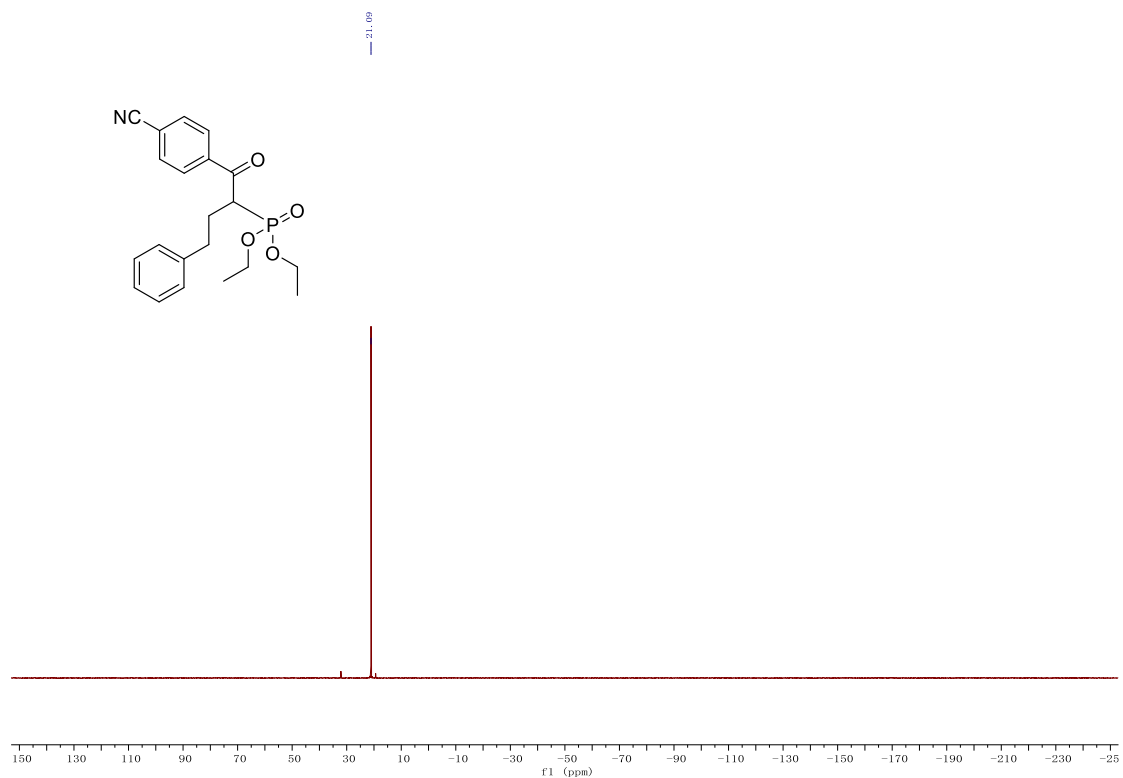

Figure S193.  $^{31}\text{P}$  NMR (162 MHz,  $\text{CDCl}_3$ ) spectrum of 4p

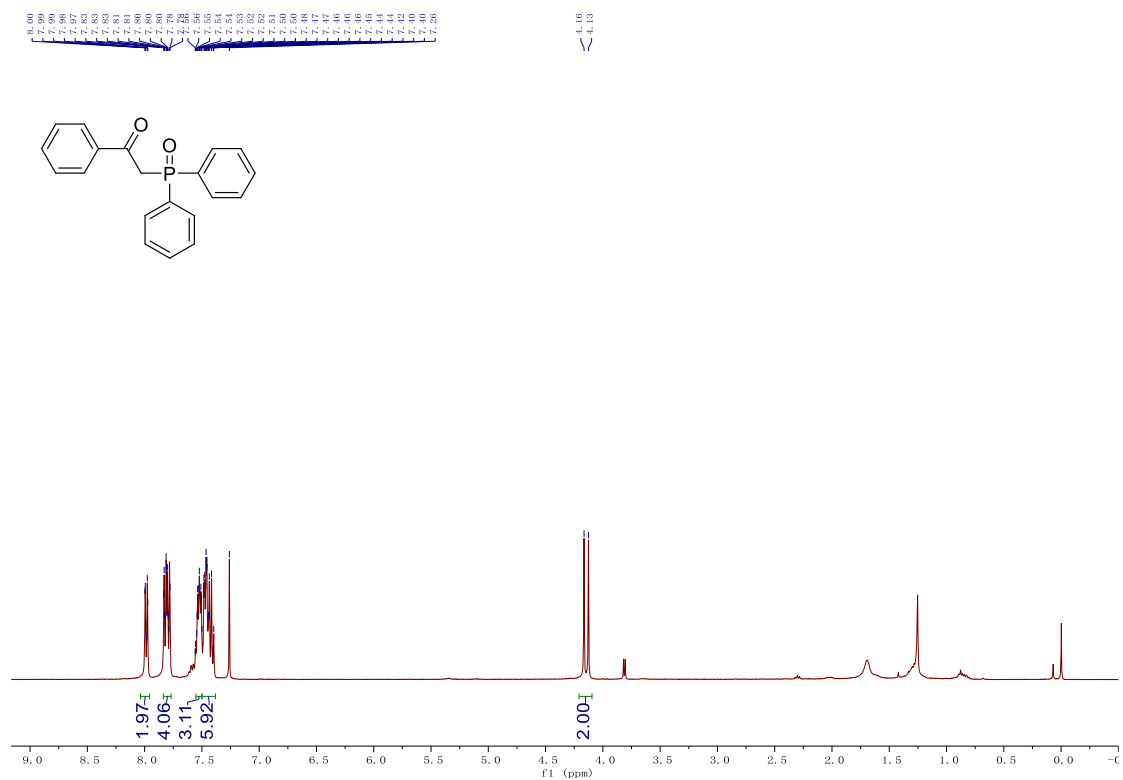

Figure S194.  $^1\text{H}$  NMR (400 MHz,  $\text{CDCl}_3$ ) spectrum of 4q

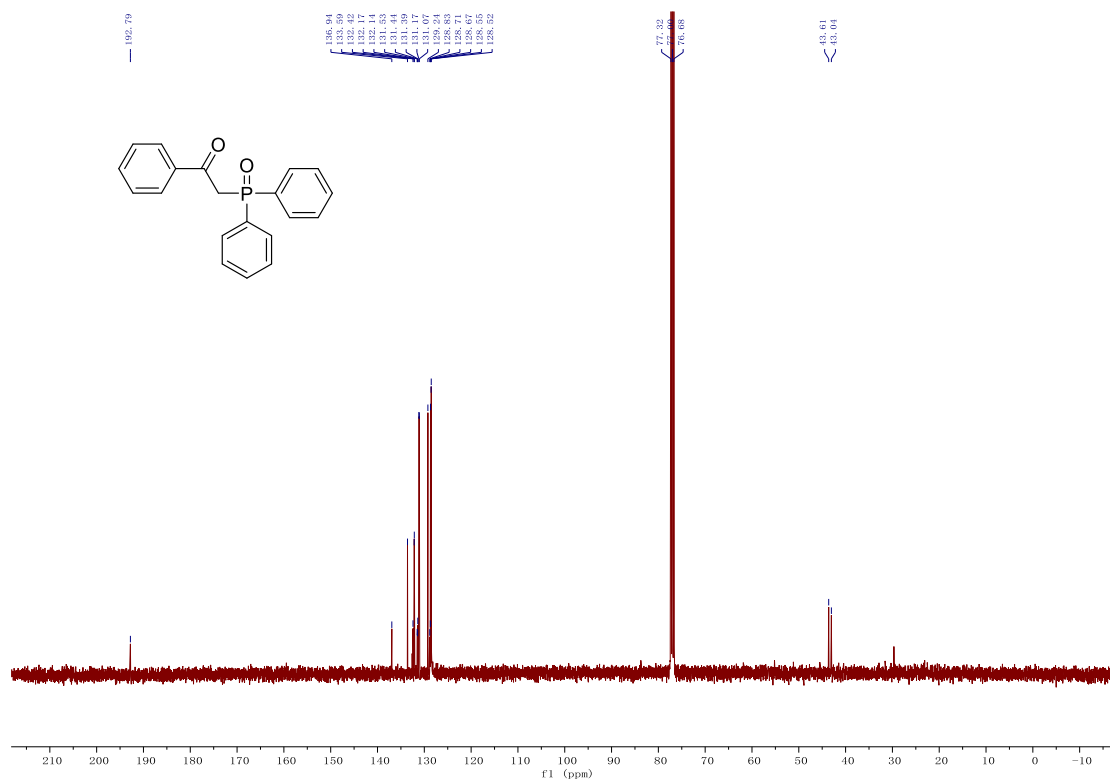

Figure S195. <sup>13</sup>C NMR (101 MHz, CDCl<sub>3</sub>) spectrum of 4q

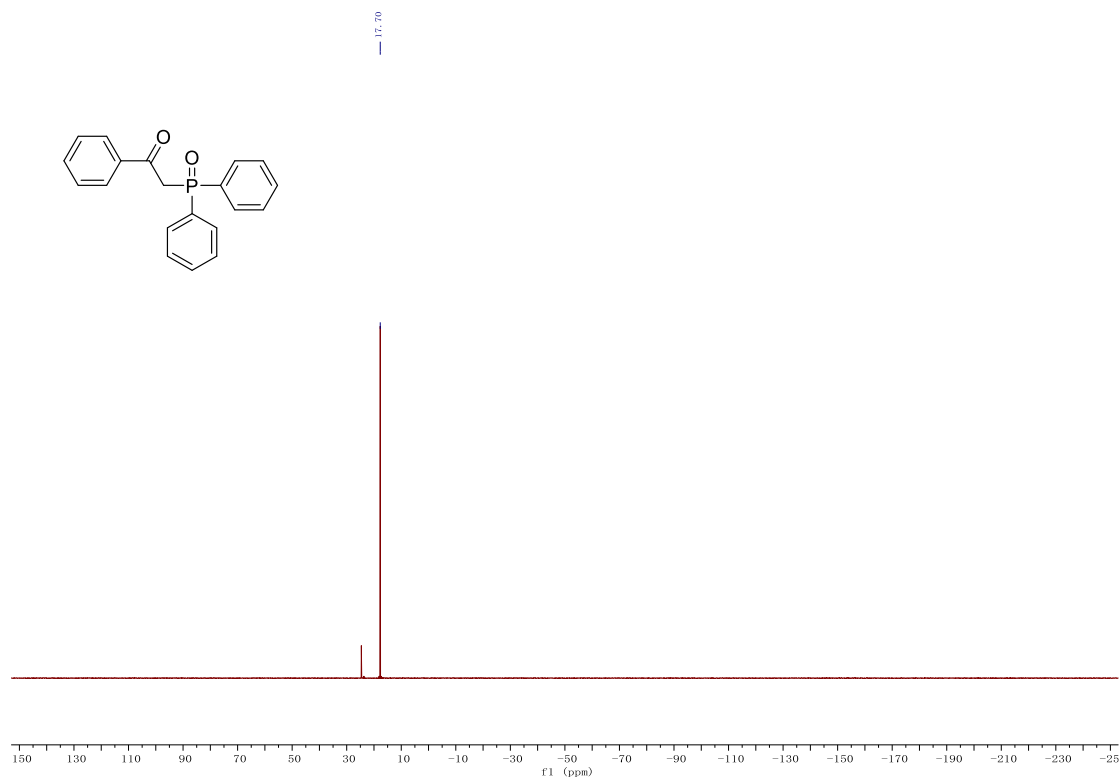

Figure S196 <sup>31</sup>P NMR (162 MHz, CDCl<sub>3</sub>).spectrum of 4q

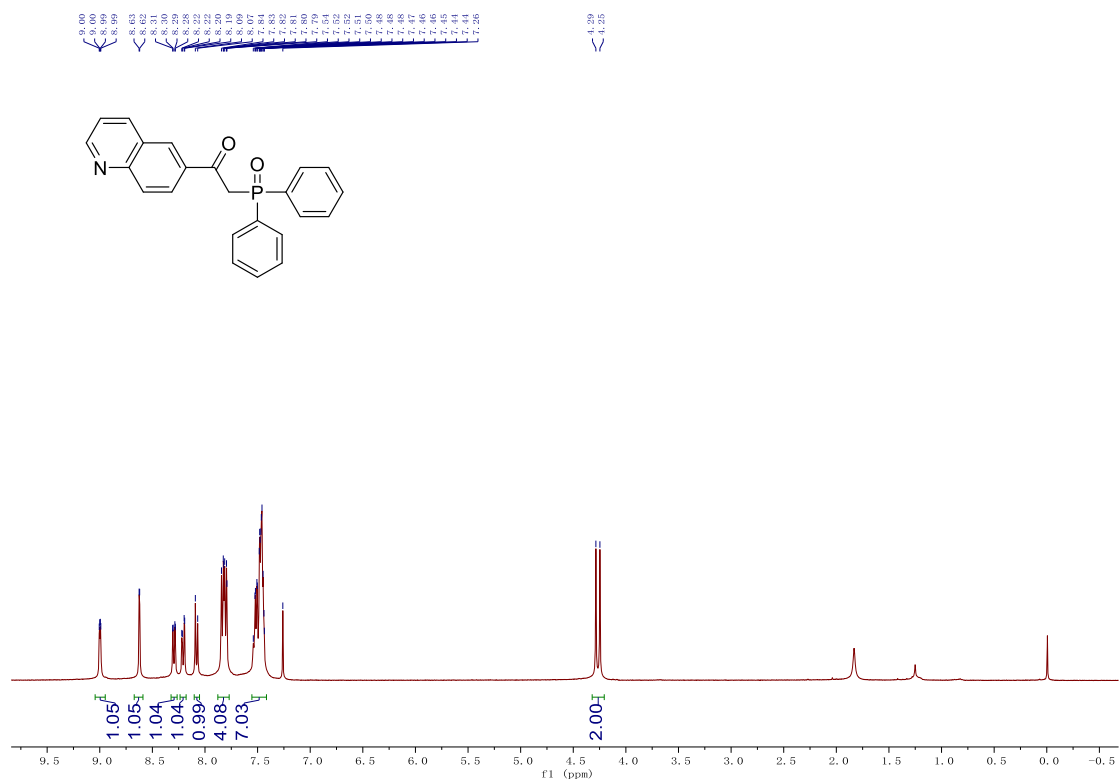

Figure S197. <sup>1</sup>H NMR (400 MHz, CDCl<sub>3</sub>) spectrum of 4r

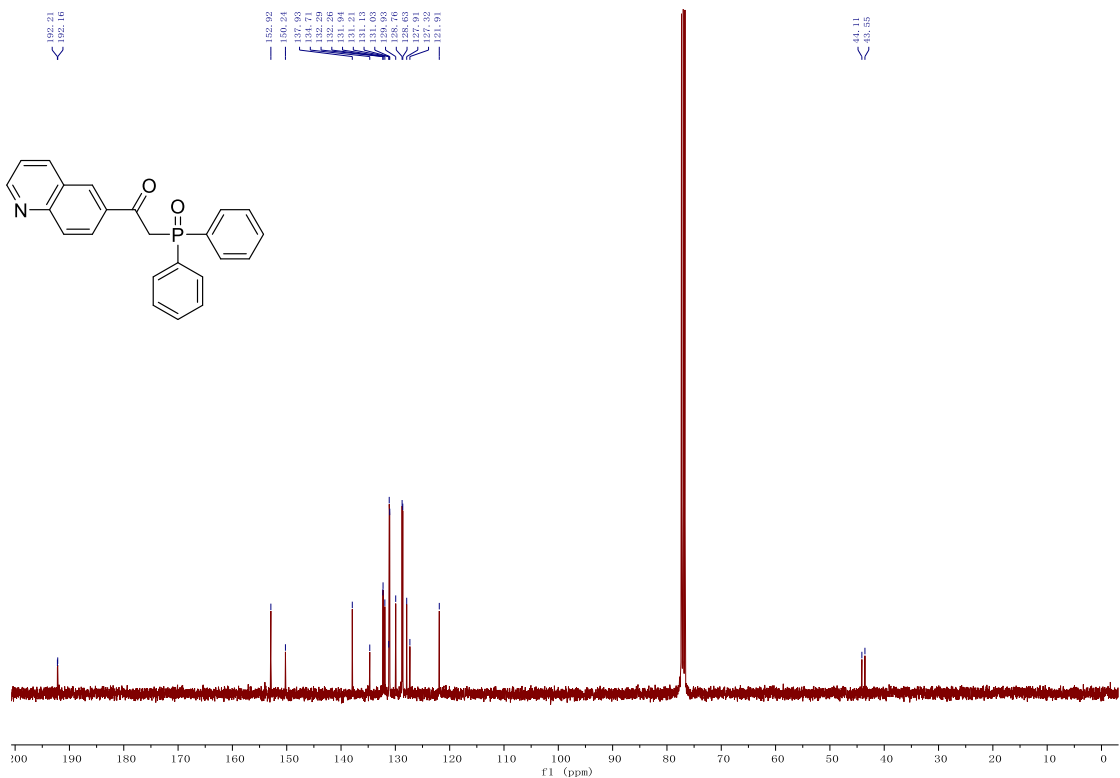

Figure S198. <sup>13</sup>C NMR (101 MHz, CDCl<sub>3</sub>) spectrum of 4r

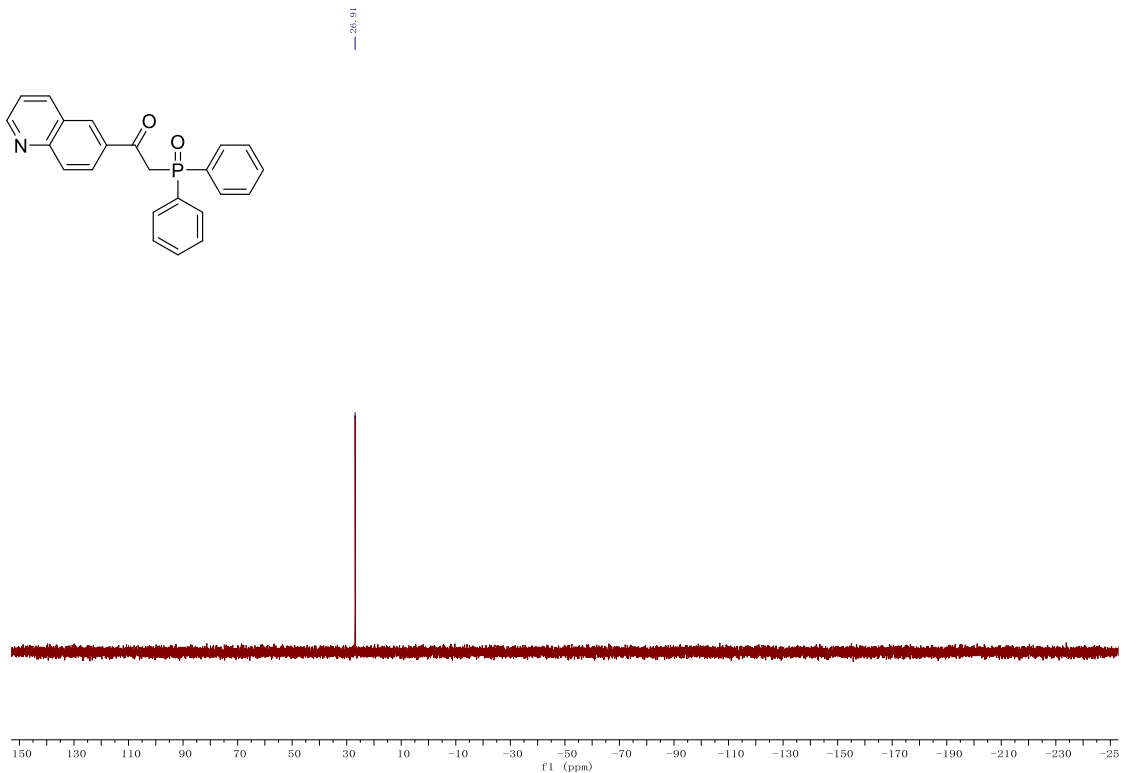

Figure S199.  $^{31}\text{P}$  NMR (162 MHz,  $\text{CDCl}_3$ ) spectrum of 4r

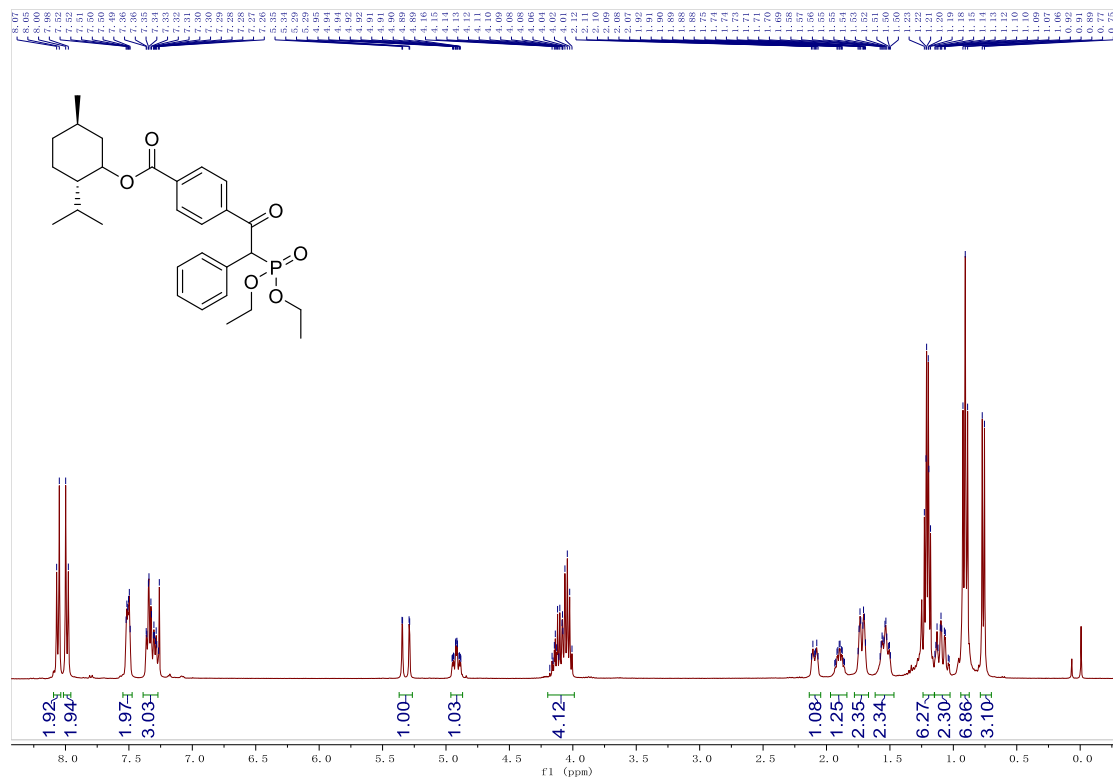

Figure S200.  $^1\text{H}$  NMR (400 MHz,  $\text{CDCl}_3$ ) spectrum of 5

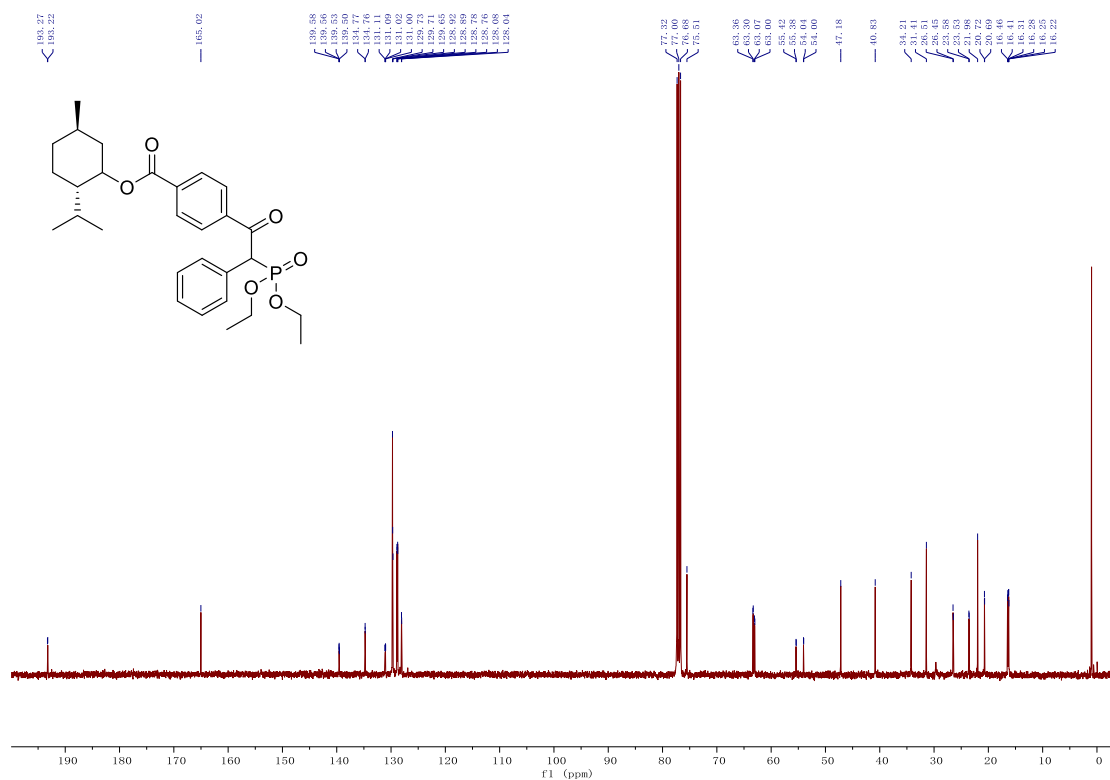

Figure S201. <sup>13</sup>C NMR (101 MHz, CDCl<sub>3</sub>) spectrum of 5

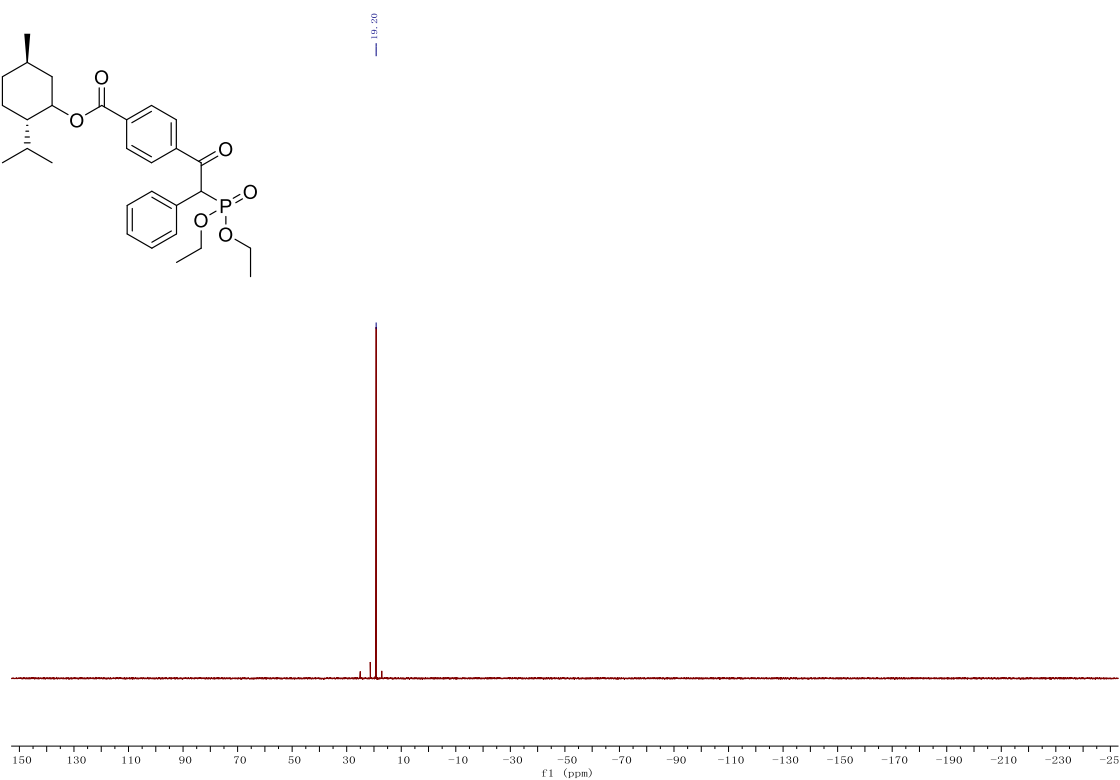

Figure S202. <sup>31</sup>P NMR (162 MHz, CDCl<sub>3</sub>) spectrum of 5

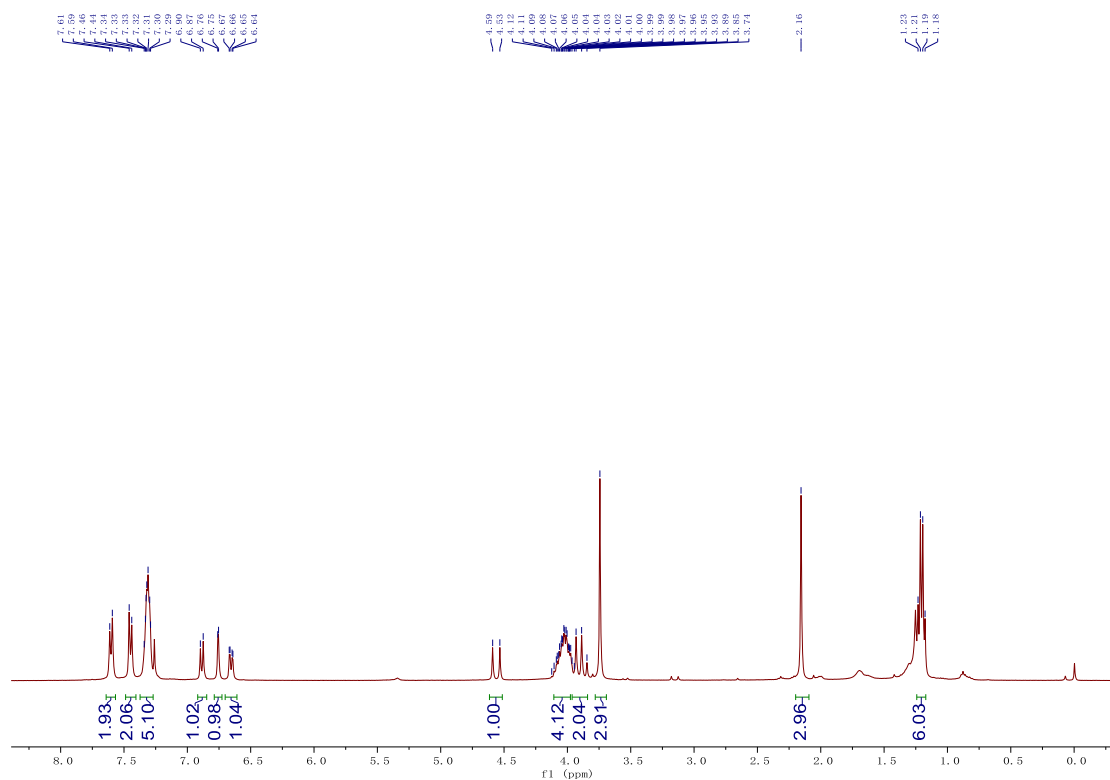

Figure S203.  $^1\text{H}$  NMR (400 MHz,  $\text{CDCl}_3$ ) spectrum of **6**

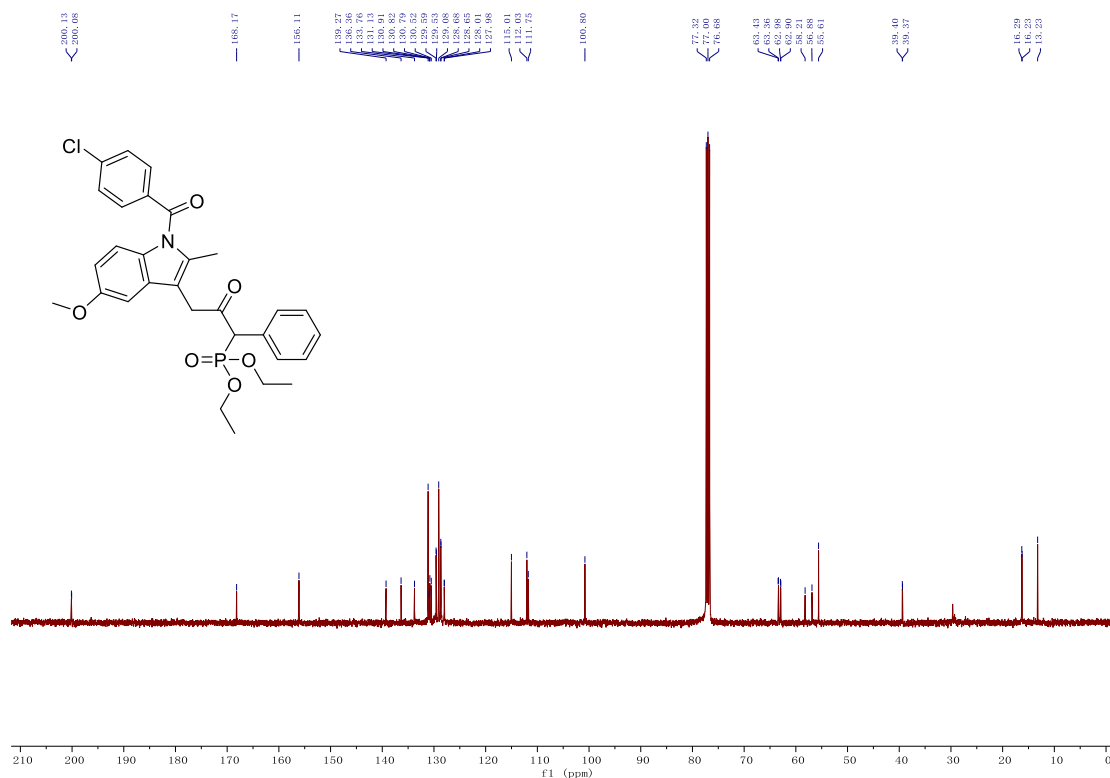

Figure S204.  $^{13}\text{C}$  NMR (101 MHz,  $\text{CDCl}_3$ ) spectrum of **6**

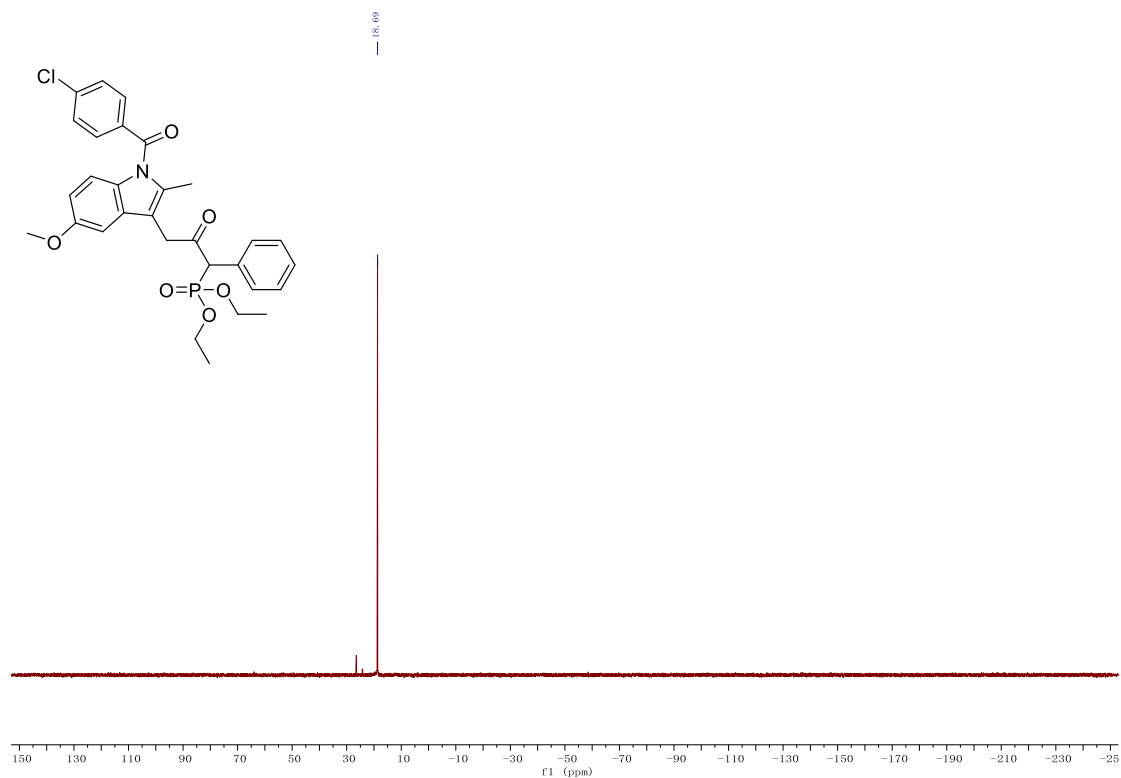

Figure S205.  $^{31}\text{P}$  NMR (162 MHz,  $\text{CDCl}_3$ ) spectrum of 6

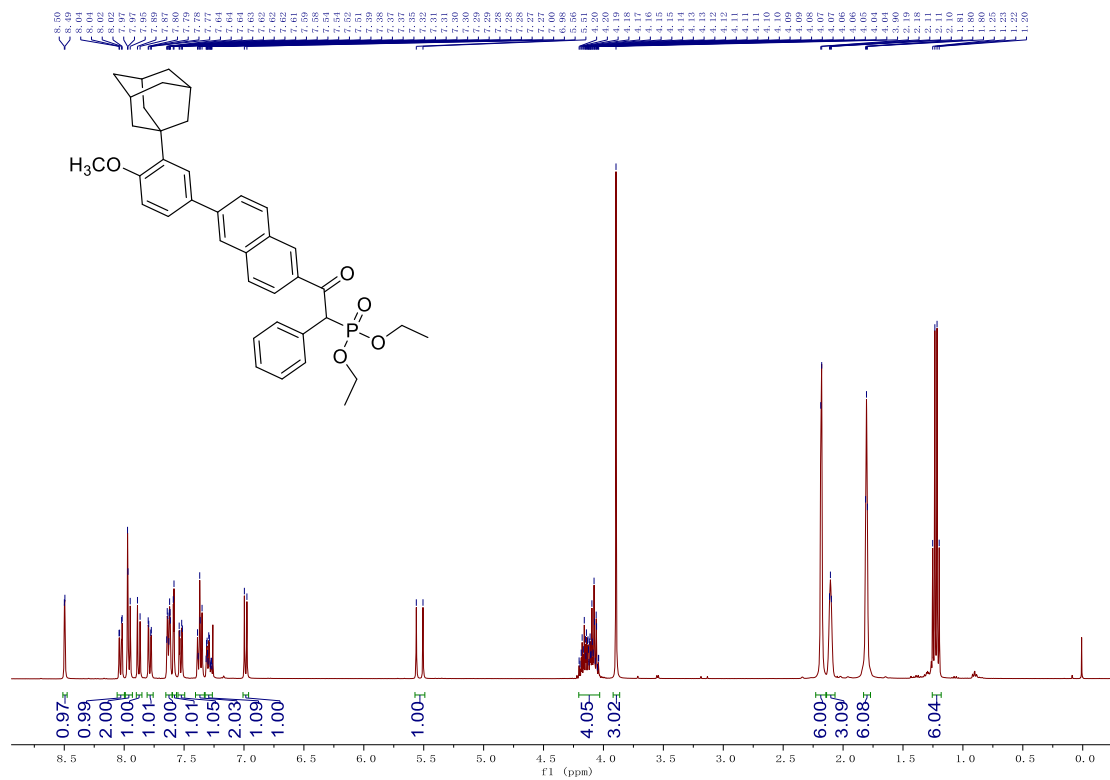

Figure S206.  $^1\text{H}$  NMR (400 MHz,  $\text{CDCl}_3$ ) spectrum of 7

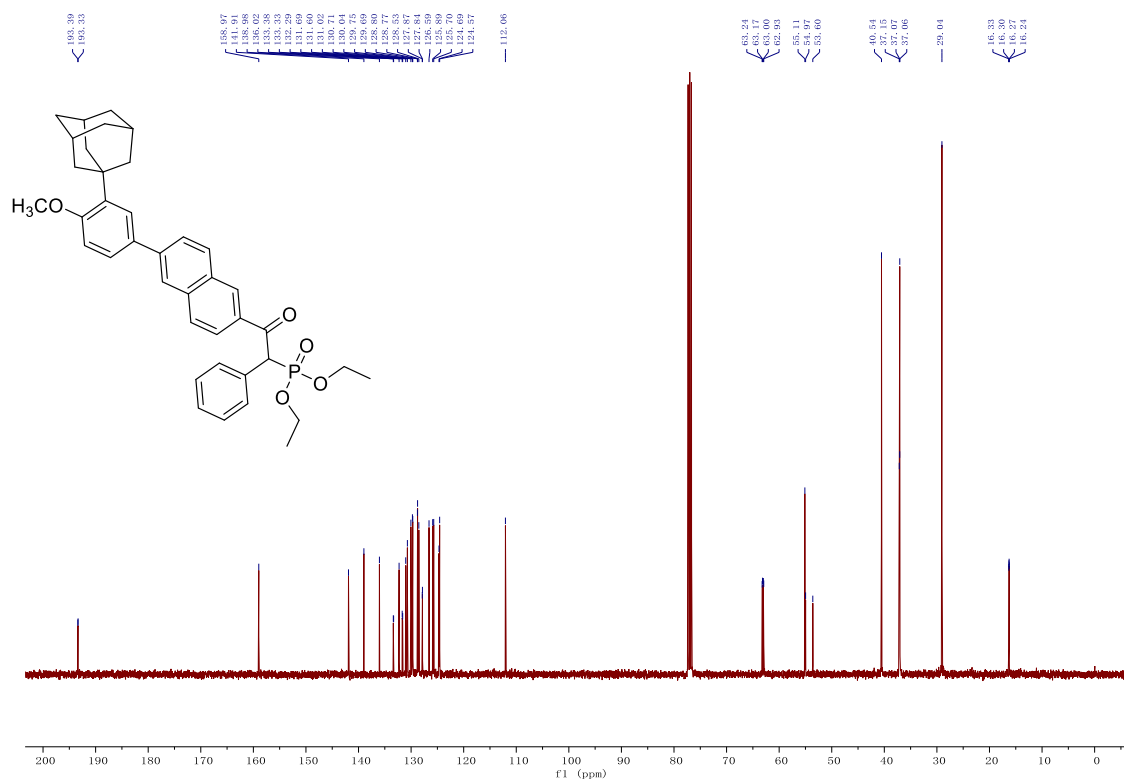

Figure S207.  $^{13}\text{C}$  NMR (101 MHz,  $\text{CDCl}_3$ ) spectrum of 7

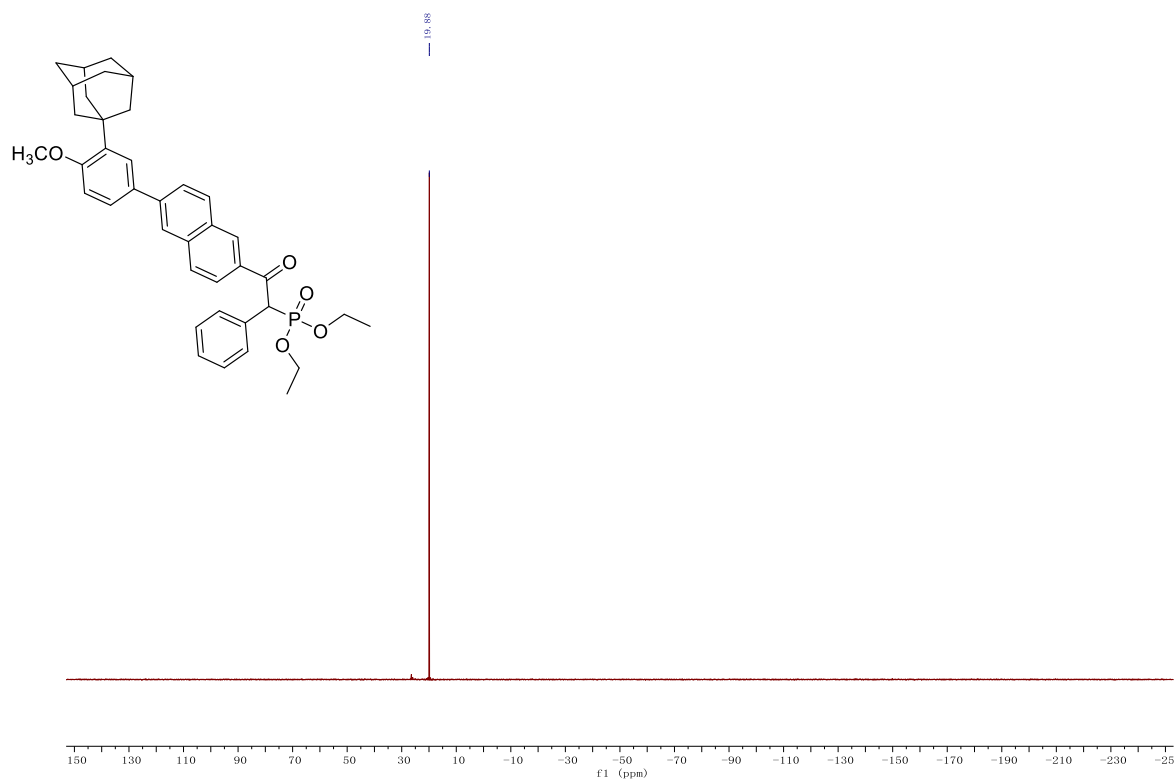

Figure S208.  $^{31}\text{P}$  NMR (162 MHz,  $\text{CDCl}_3$ ) spectrum of 7

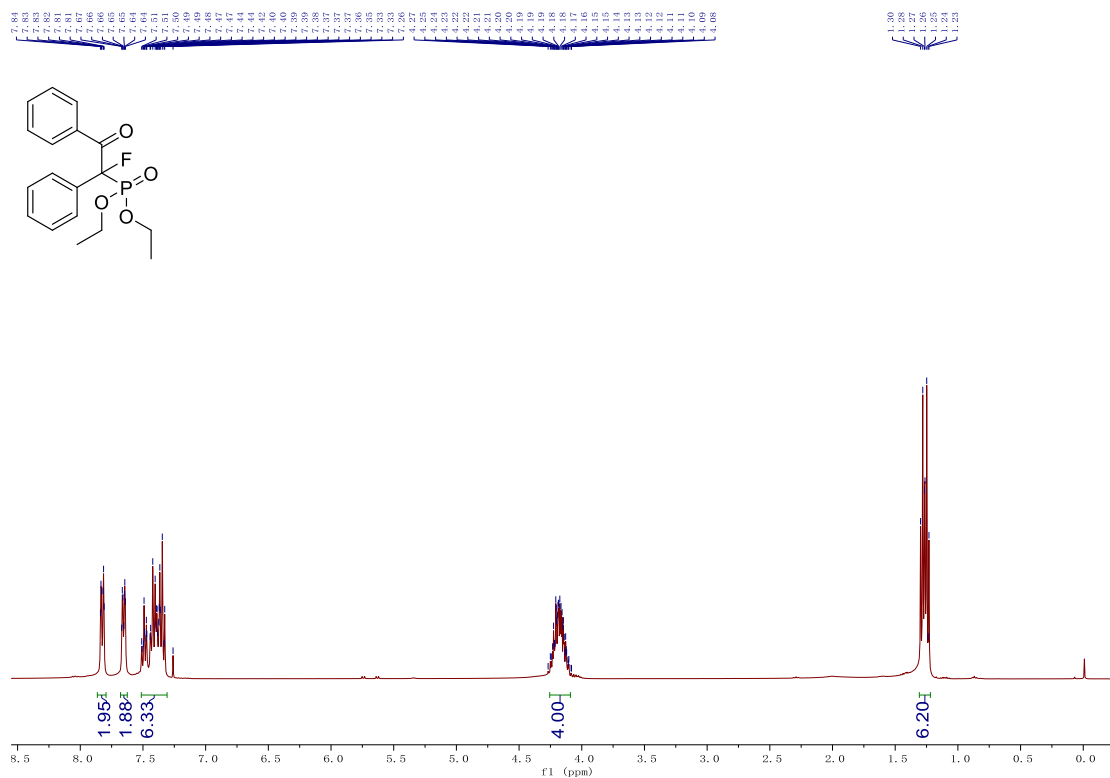

Figure S209. <sup>1</sup>H NMR (400 MHz, CDCl<sub>3</sub>) spectrum of 8

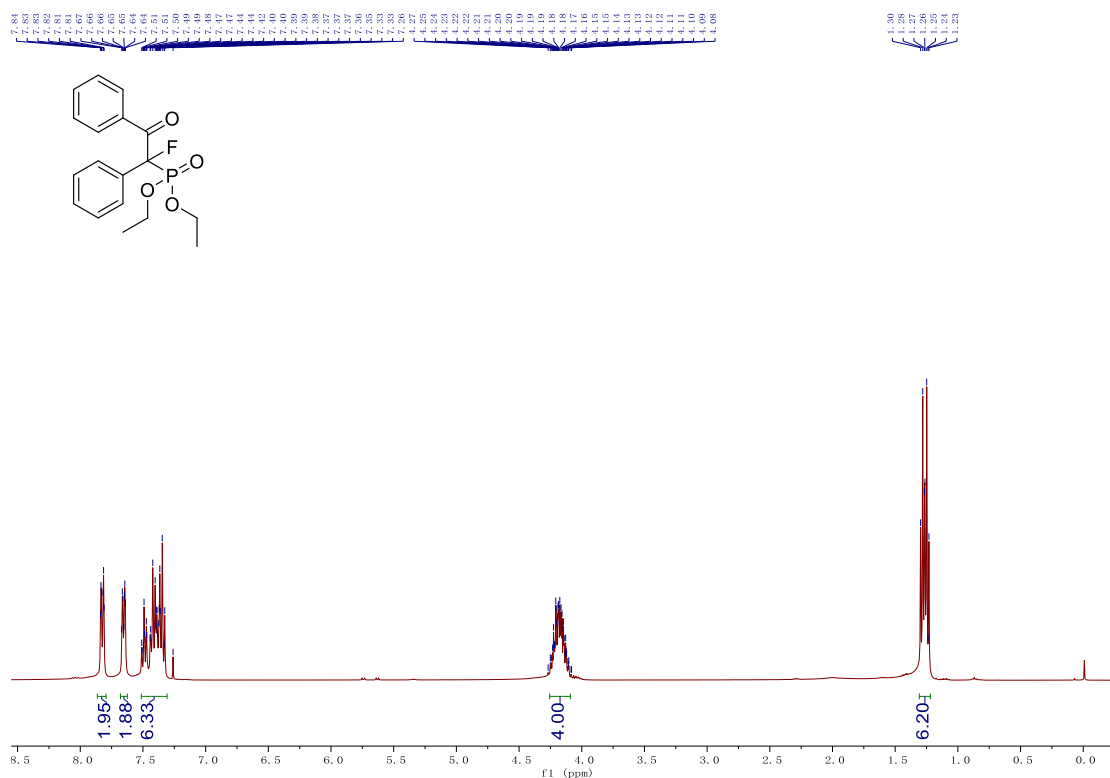

Figure S210. <sup>13</sup>C NMR (101 MHz, CDCl<sub>3</sub>) spectrum of 8

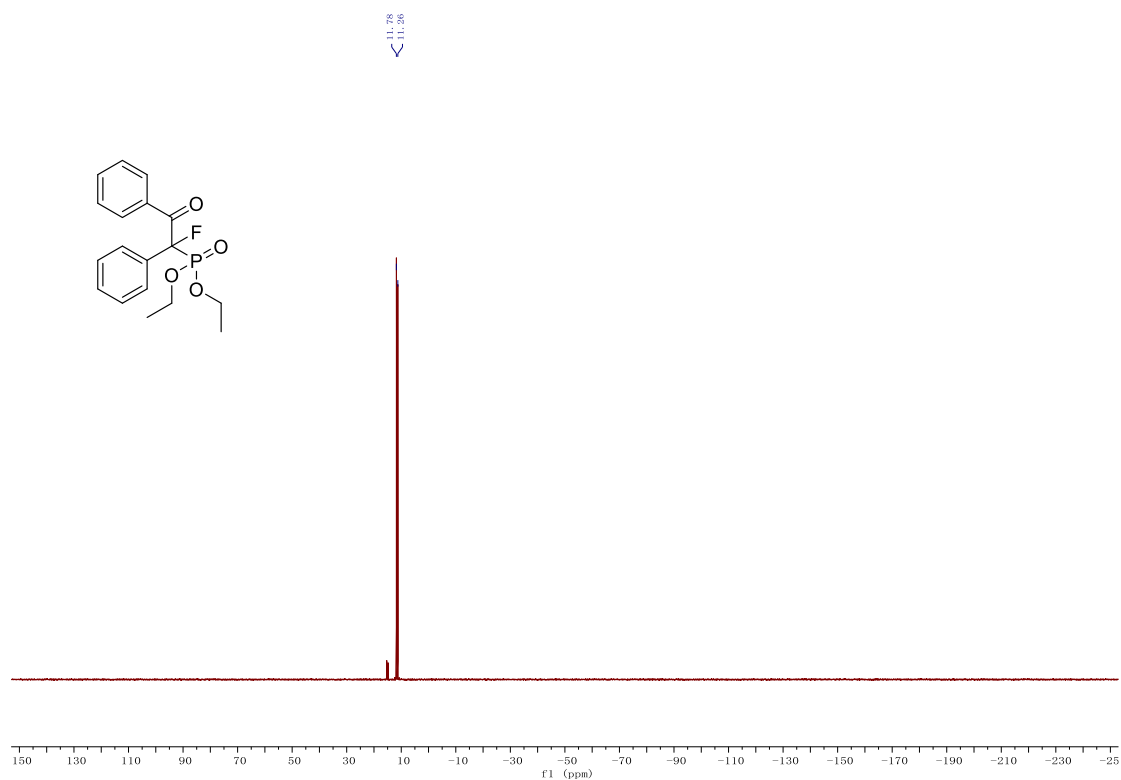

Figure S211.  $^{31}\text{P}$  NMR (162 MHz,  $\text{CDCl}_3$ ) spectrum of **8**

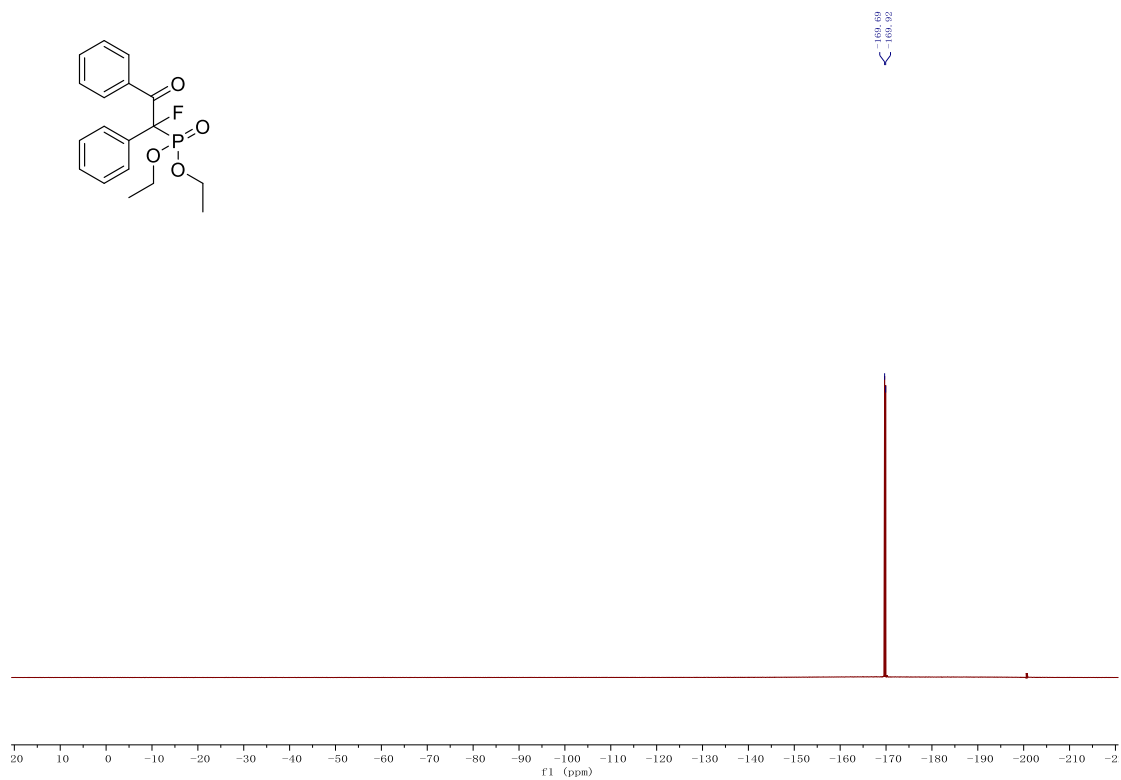

Figure S212.  $^{19}\text{F}$  NMR (377 MHz,  $\text{CDCl}_3$ ) spectrum of **8**

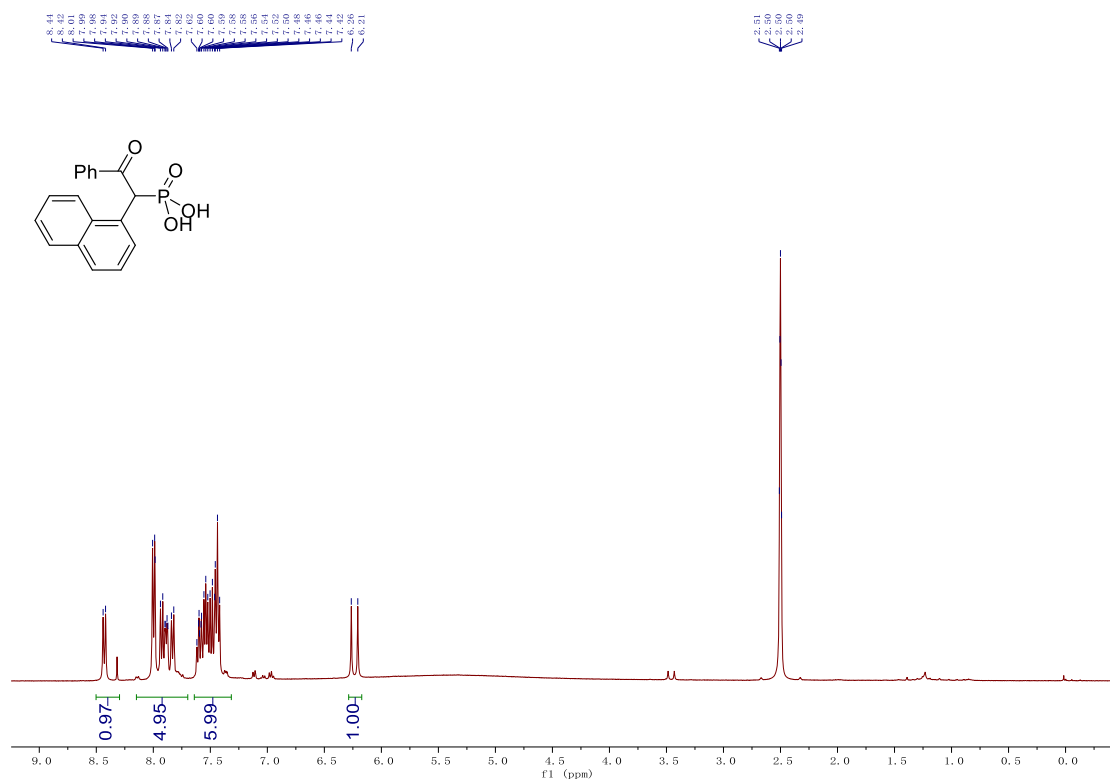

Figure S213. <sup>1</sup>H NMR (400 MHz, DMSO) spectrum of 9

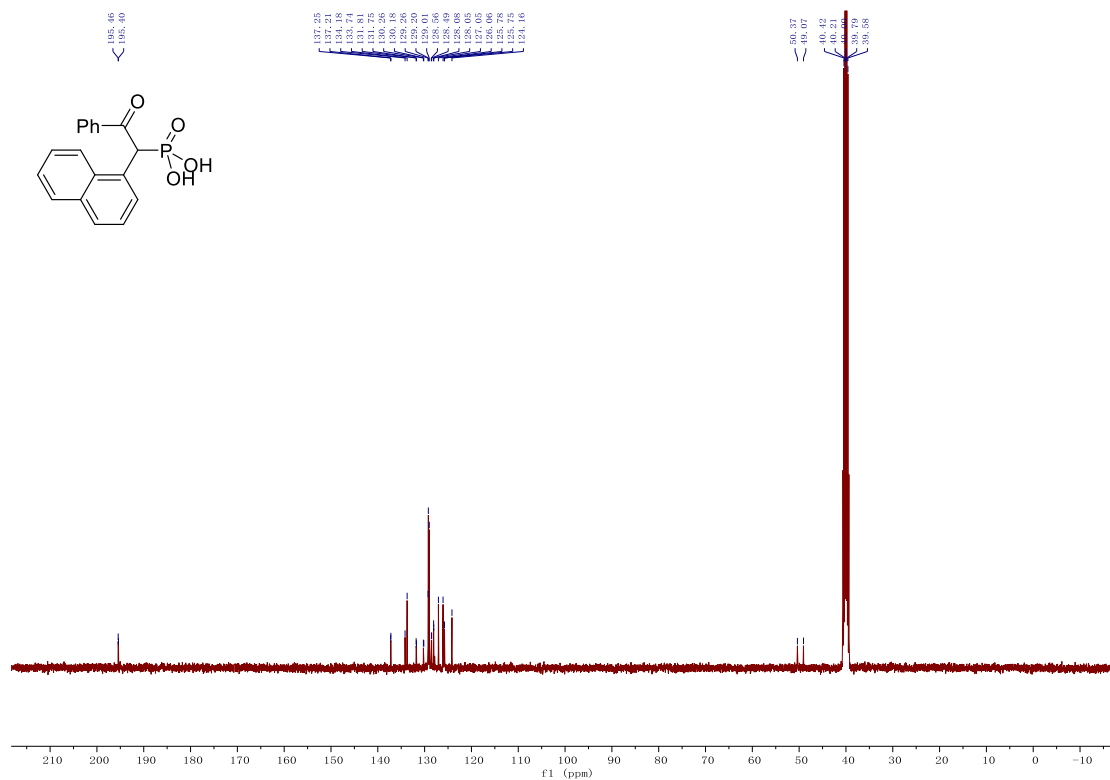

Figure S214. <sup>13</sup>C NMR (101 MHz, DMSO) spectrum of 9

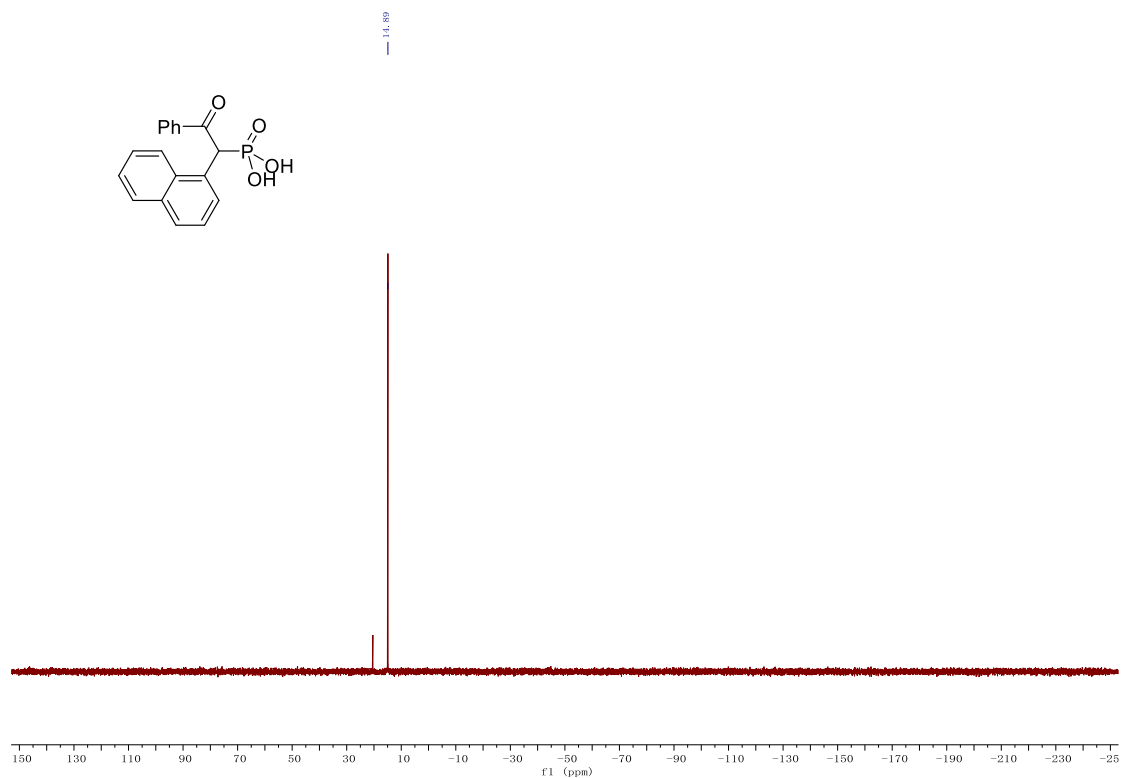

Figure S215.  $^{31}\text{P}$  NMR (162 MHz, DMSO).spectrum of 9

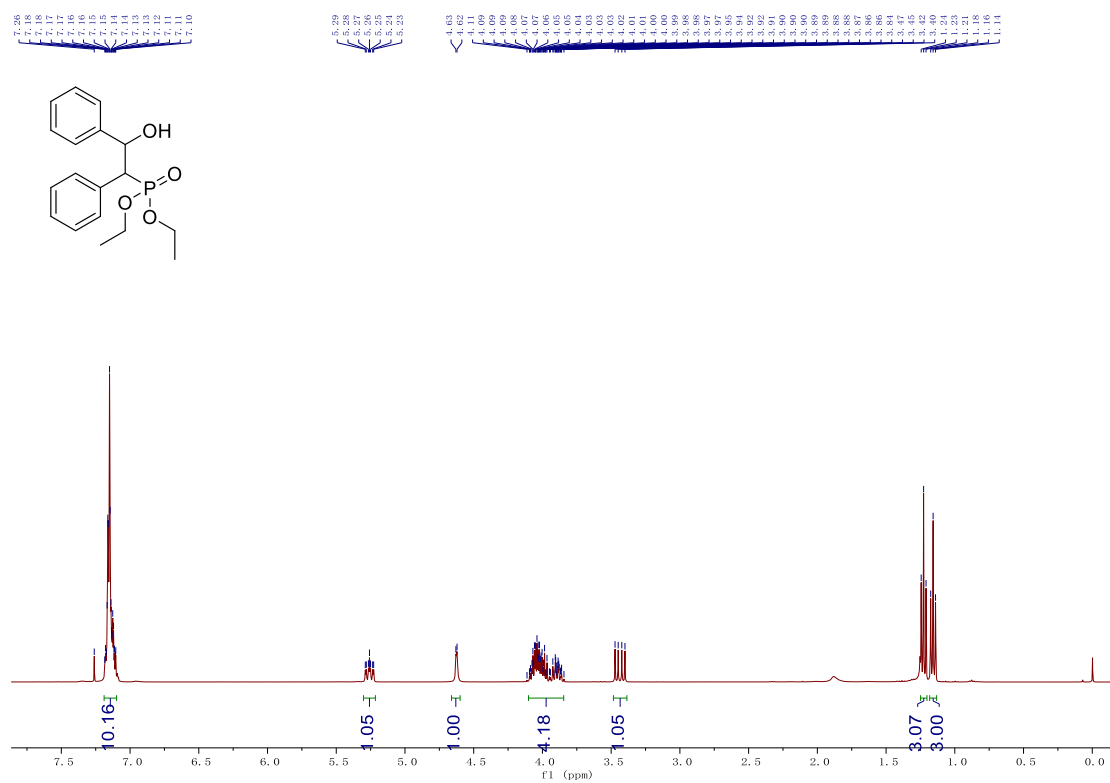

Figure S216.  $^1\text{H}$  NMR (400 MHz,  $\text{CDCl}_3$ ) spectrum of 10

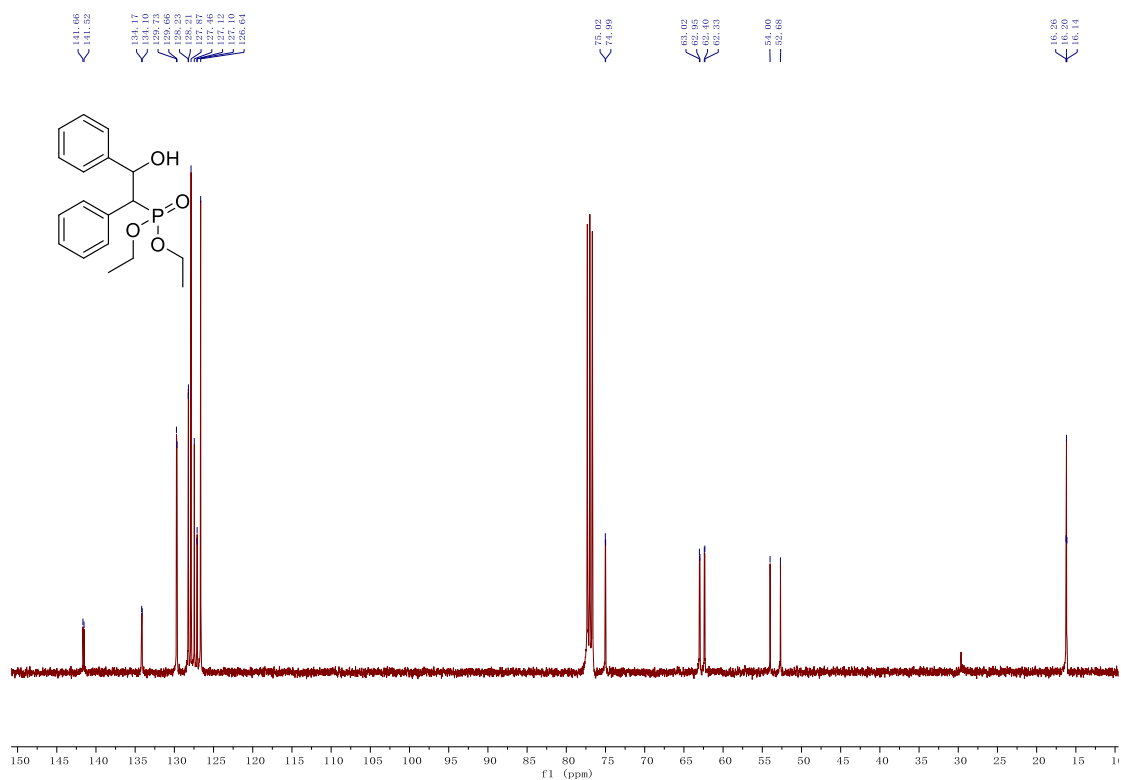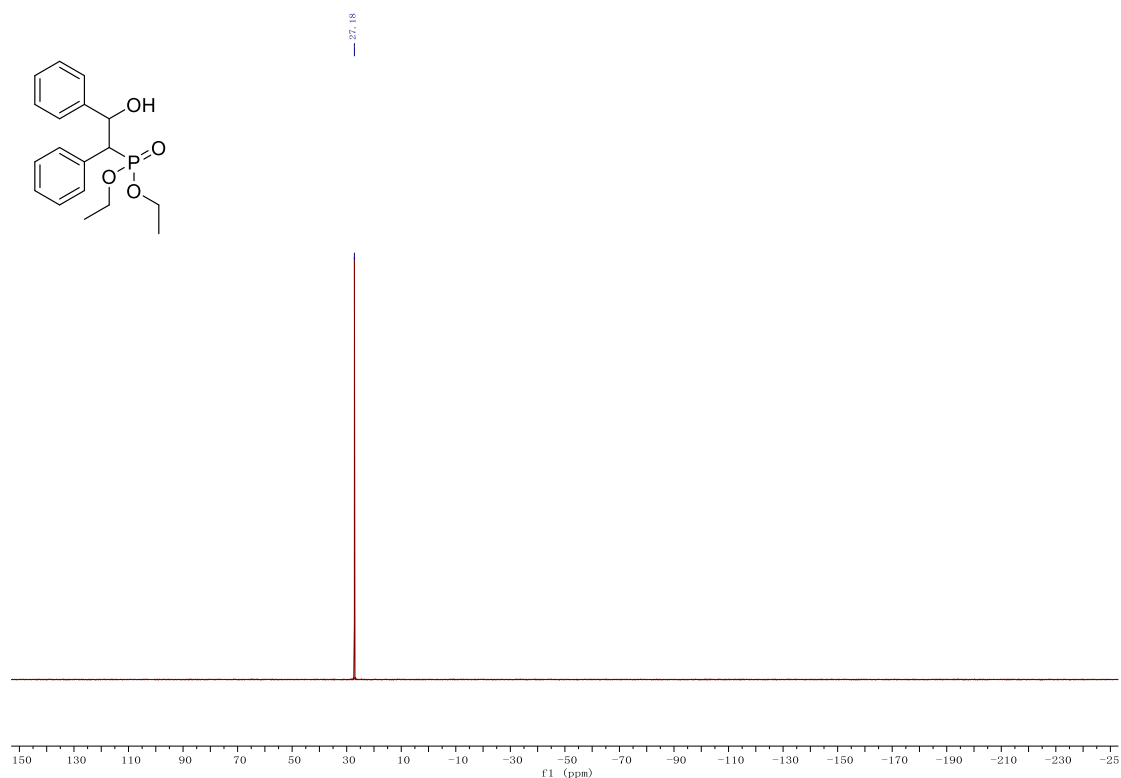

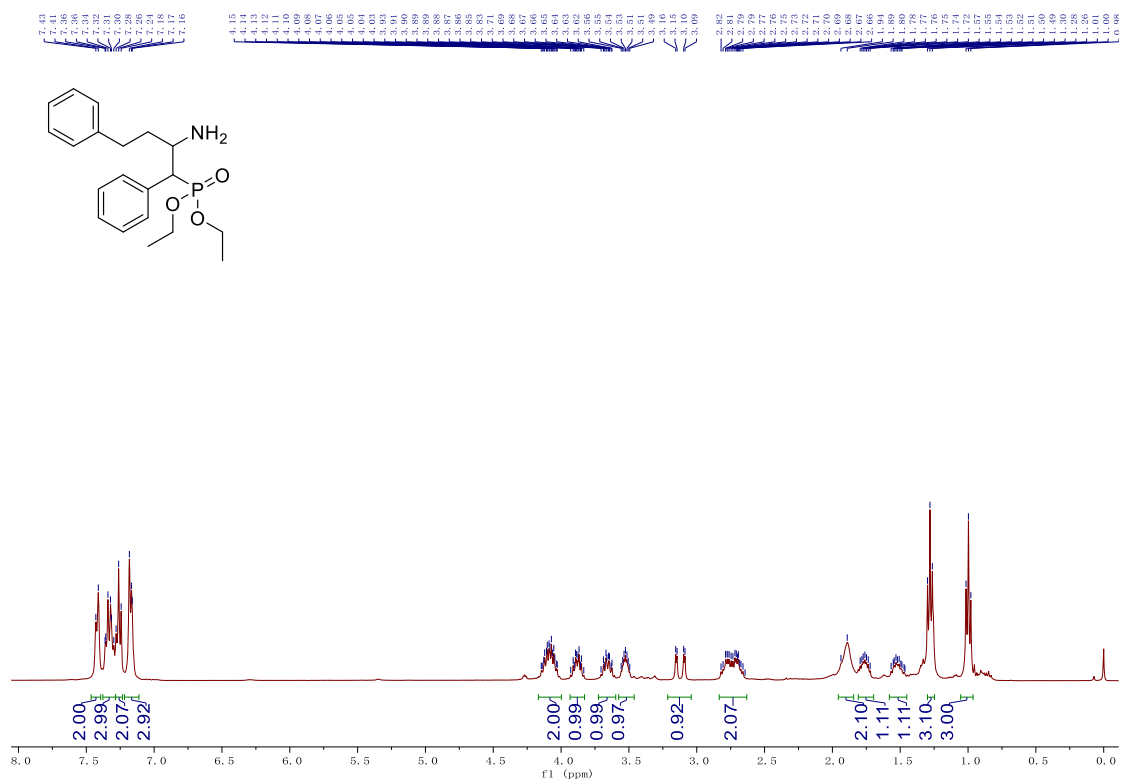

Figure S219. <sup>1</sup>H NMR (400 MHz, CDCl<sub>3</sub>) spectrum of 11

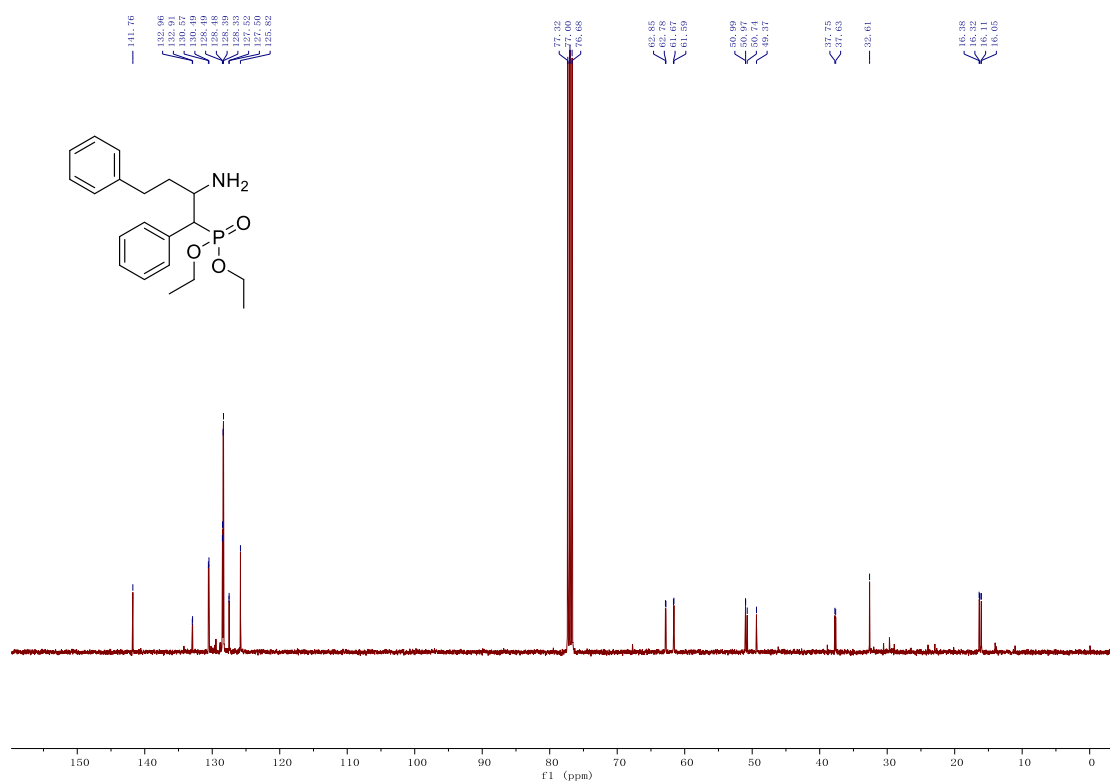

Figure S220. <sup>13</sup>C NMR (101 MHz, CDCl<sub>3</sub>) spectrum of 11

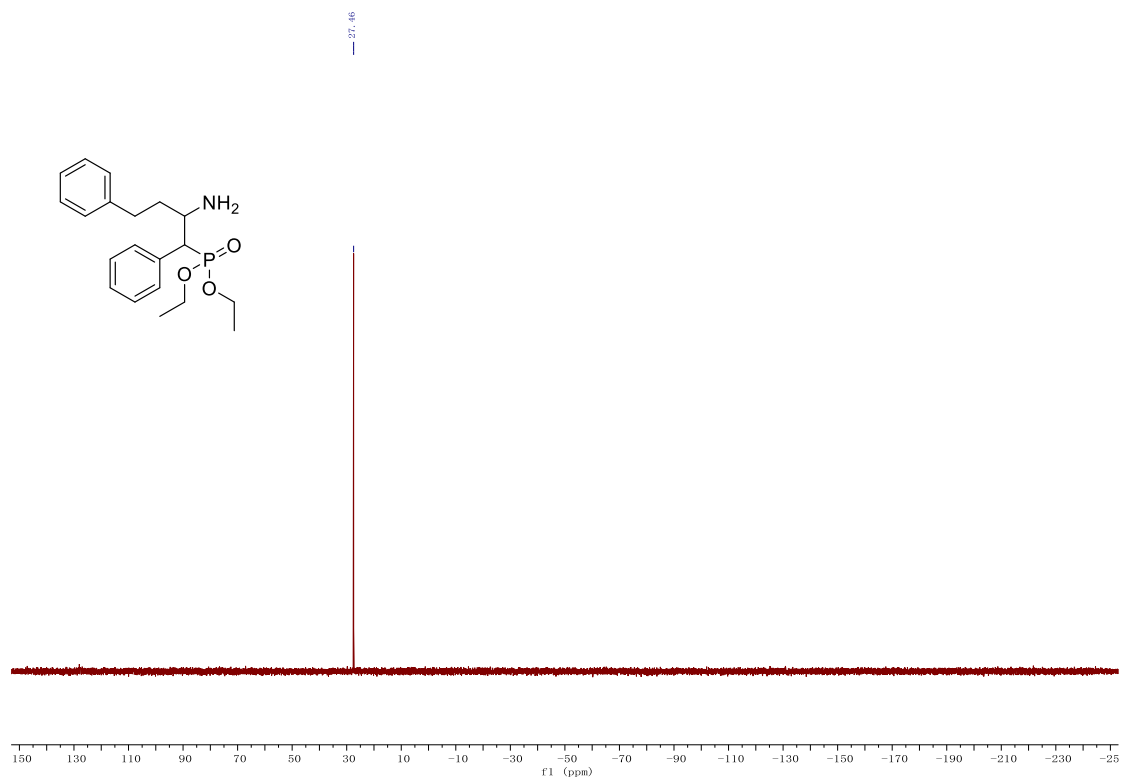

Figure S221.  $^{31}\text{P}$  NMR (162 MHz,  $\text{CDCl}_3$ ).spectrum of 11
